# Supplementary material for: UvrD helicase–RNA polymerase interactions are governed by UvrD’s carboxy-terminal Tudor domain
Source: Commun Biol. 2020 Oct 23;3:607. doi: 10.1038/s42003-020-01332-2 (PMC7585439; doi:10.1038/s42003-020-01332-2)
Supplement: Supplementary file 4 — Supplementary Data 1 [file 42003_2020_1332_MOESM4_ESM.xlsx]

## Sheet: Figure 1
panel c						panel e
	R𝛽			R 𝛂
Delay [ms]	Integration [AU]		Delay [ms]	Integration [AU]		residue no.	∆𝛅(13C𝛂-13C𝜷) [ppm]		residue no.	∆𝛅(13CO) [ppm]
0	1000		0	1000		645	0.203		645	0.17
7	923.611		3	946.119		646	0.098		646	0.05
14	880.3		6	898.444		647	0.013		647	0
21	830.83		9	845.487		648	-0.07		648	0.02
28	773.99		12	804.614		649	-0.15		649	0
35	739.058		15	764.772		650	-0.09		650	0.43
42	692.995		18	723.674		651	0.044		651	1
49	657.96		21	682.177		652	0.056		652	0.61
56	612.281		24	658.757		653	0.047		653	0.15
63	580.842		27	635.462		654	0.063		654	0.06
70	545.201		30	608.123		655	0.002		655	-0.1
77	518.612		33	576.152		656			656
84	476.37		36	555.433		657	0		657	0.02
91	443.888		39	524.757		658	-0.02		658	0.06
98	426.676		42	501.196		659	0.02		659	0.05
105	403.482		45	473.997		660	0.016		660	0.08
112	371.514		48	450.217		661	-0.1		661	0.11
119	363.19		51	425.233		662	-0.13		662	0.03
126	346.63		54	411.346		663	-0.11		663	-0.1
133	322.445		57	386.471		664	-0.17		664	-0.1
140	293.723		60	375.101		665	-0.31		665	0
147	289.77		63	360.148		666	-0.32		666	0.02
154	274.524		66	338.488		667	-0.2		667	-0.1
161	256.872		69	317.536		668	-0.24		668	-0.2
168	240.534		72	304.921		669	-0.76		669	-0.3
						670	-2.31		670	-0.4
						671	-2.35		671	-0.1
						672	-0.11		672	0.22
						673	0.391		673	-0.1
						674	-0.4		674	-0.2
						675	-2.37		675	-0.3
						676	-4.99		676	-1.2
						677	-5.42		677	-1
						678	-3.34		678	0.3
						679	-0.22		679	1.12
						680	0.785		680	1.03
						681	0.589		681	0.05
						682	0.043		682	-0.3
						683	-0.43		683	-0.6
						684	-0.67		684	-1.4
						685	-0.37		685	-0.8
						686	0.902		686	0
						687	-0.29		687	-0.5
						688	-2.73		688	-1.7
						689	-4		689	-2.2
						690	-3.69		690	-1.8
						691	-2.3		691	-1.3
						692	-1.34		692	0.02
						693	0.524		693	1.3
						694	1.7		694	0.93
						695	0.976		695	0.15
						696	-0.62		696	-0.3
						697	-3.47		697	-1.5
						698	-4.05		698	-2.2
						699	-2.45		699	-1.9
						700	-2.19		700	-1.6
						701	-1.54		701	-0.7
						702	0.657		702	0.77
						703	2.054		703	1.25
						704	0.885		704	0.59
						705	-0.68		705	-0.6
						706	-0.67		706	-0.7
						707	-1.82		707	0.04
						708	-3.58		708	0.29
						709	-3.55		709	0.32
						710	-2.39		710	0.51
						711	0.962		711	1.4
						712	3.684		712	1.78
						713	2.125		713	1.13
						714	-0.19		714	0.35
						715	0.398		715	-0.4
						716	0.82		716	-0.6
						717	-1.53		717	-0.2
						718	-2.28		718	0.05
						719	-0.52		719	0.19
						720	0		720

## Sheet: Figure 2
panel a				panel b				panel d				panel e
residue no.	HetNOE [AU]		residue no.	R1 [s-1]			residue no.	S2 [AU]			residue no.	Rex [s-1]
645	-0.116711		645	2.28453			645	0.0001			645	3.4927
646	-0.346534		646	2.35953			646	7.5e-05			646	2.4811
647	-0.444228		647	2.51601			647	0.032575			647	2.4164
648	-0.377677		648	2.41176			648	0.0651			648	1.9095
649	-0.444395		649	2.31461			649	0.0405			649	3.3704
650	-0.370911		650	2.45182			650	0.0159			650	2.441
651	-0.386771		651	2.54031			651	0.0106			651	2.2414
652	-0.352127		652				652				652
653	0		653				653				653
654	-0.164418		654	2.42116			654	0.000466667			654	2.2448
655	-0.366749		655	2.46124			655	0.000333333			655	1.6843
656	-0.370911		656	2.65945			656				656
657			657				657				657
658	-0.163875		658	2.3372			658	0.3634			658	4.125
659	-0.282972		659	2.32525			659				659
660	-0.578582		660	2.26165			660	0.0235333			660	2.6222
661	-0.0559825		661	2.41271			661	0.0117667			661	1.9543
662	0		662				662				662
663	-0.106084		663	2.57042			663	0.0012			663	1.8069
664	-0.023255		664	2.24714			664	0.0006			664	1.7497
665	0.176744		665	2.38398			665				665
666	0.130673		666	2.45094			666	0			666	2.2361
667	0.270305		667	2.20786			667	2.5e-05			667	3.9053
668	0.285007		668	2.23986			668	5e-05			668	3.3206
669	0.4273		669	2.37441			669	0.017775			669	3.7378
670	0.515711		670	2.40268			670	0.221525			670	0.7299
671	0.457994		671	2.04784			671	0.519733			671
672	0.700893		672	2.20526			672				672
673	0.659545		673	1.94625			673	0.756967			673
674	0.653534		674	2.0813			674	0.793525			674	0.4291
675	0.656877		675	1.94545			675	0.70685			675
676	0.637439		676	1.98088			676	0.57965			676
677	0.634988		677	1.82871			677	0.63455			677
678	0.69833		678	1.88848			678	0.7447			678
679	0.521354		679	1.99215			679	0.769425			679	2.5958
680	0.691083		680	1.96037			680	0.780325			680
681	0.676991		681	1.89587			681	0.73375			681
682	0.386481		682	2.0577			682	0.626775			682	1.1842
683	0.663941		683	1.91772			683	0.579325			683
684	0.661861		684	1.94323			684	0.559625			684
685	0.67082		685	1.88203			685	0.569075			685
686	0.627933		686	2.02193			686	0.5315			686
687	0.357507		687	2.08743			687	0.51755			687	0.6446
688	0.602196		688	1.97082			688	0.6411			688
689	0.519974		689	1.86817			689	0.6886			689
690	0.675247		690	1.98796			690	0.690875			690
691	0.675191		691	1.82604			691	0.745225			691	2.3216
692	0.626125		692	1.86958			692	0.7685			692	1.7519
693	0.399486		693	1.9392			693				693
694			694				694				694
695	0.405723		695	2.08197			695	0.5448			695	2.9614
696	0.591954		696	1.84561			696	0.64115			696
697	0.682244		697	1.9695			697	0.606675			697
698	0.676153		698	1.91986			698	0.6453			698
699	0.685429		699	1.90124			699	0.7971			699
700	0.663016		700	1.97121			700	0.79565			700
701	0.504753		701	1.93099			701	0.725725			701
702	0.528994		702	1.88087			702	0.7188			702	0.2031
703	0.731381		703	1.89315			703				703
704			704				704				704
705	0.649567		705	1.99312			705	0.825633			705	0.1475
706	0.316882		706	1.82493			706	0.57725			706	1.6135
707	0.743736		707	1.96396			707	0.36755			707
708	0.684975		708	1.89293			708	0.566825			708
709	0.728848		709	1.80386			709	0.69895			709	0.399
710	0.666355		710	1.84515			710	0.639625			710
711	0.726813		711	1.7309			711	0.71485			711	1.0747
712	0.698496		712	1.98582			712	0.803775			712	0.7598
713	0.755874		713	1.82773			713	0.823025			713	1.6939
714	0.615892		714	1.75191			714	0.80085			714
715	0.555143		715	1.91848			715	0.7518			715
716	0.670716		716	1.87214			716	0.72255			716	1.943
717	0.326603		717	1.94355			717	0.70075			717
718	0.613589		718	1.76643			718	0.72235			718	0.1598
719	0.459782		719	1.77458			719	0.7536			719	0.1991
720	0.453627		720	2.19324			720				720

## Sheet: Figure 3
panel c							panel d
	R𝛽			R 𝛂
Delay	Integration		Delay	integration			residue no.	∆𝛅(13C𝛂-13C𝜷)		residue no.	∆𝛅(13CO)
0	1000		0	1000			472			472
7	894.284		3	872.786			473	0.105333		473
14	826.674		6	789.768			474	0.5875		474	-0.0593333
21	735.453		9	746.543			475	0.66775		475	-0.25425
28	656.607		12	695.495			476	-0.2		476	-0.68425
35	638.083		15	648.705			477	-1.88175		477	-0.69225
42	558.862		18	592.043			478	-1.335		478	-0.01375
49	498.864		21	546.833			479	1.03625		479	0.48725
56	467.551		24	493.608			480	0.95525		480	0.56525
63	418.533		27	455.653			481	0.18525		481	0.15225
70	382.079		30	411.004			482	-1.2065		482	-1.39575
77	355.764		33	392.238			483	-3.06075		483	-2.40375
84	334.136		36	363.327			484	-3.03675		484	-0.80275
91	298.805		39	344.353			485	-1.81325		485	0.83825
98	281.172		42	305.417			486	-0.08875		486	0.83925
105	259.782		45	275.313			487	0.192		487	0.5875
112	210.361		48	260.104			488	-0.3215		488	0.83525
119	193.545		51	242.087			489	0.67375		489	0.70775
126	189.695		54	229.553			490	1.1805		490	-0.167
133	173.649		57	218.827			491	-1.32425		491	0.129
140	150.213		60	203.59			492	-2.26925		492	0.552
147	146.282		63	177.463			493	-0.49625		493	-0.33325
154	124.861		66	163.371			494	-0.78875		494	-1.9475
161	119.017		69	153.635			495	-2.101		495	-2.321
168	109.677		72	144.59			496	-2.70725		496	-1.4015
							497	-2.5995		497	-1.324
							498	-2.67175		498	-1.3835
							499	-3.1235		499	-1.3465
							500	-2.598		500	-1.02775
							501	-1.123		501	-0.1645
							502	0.131		502	0.17225
							503	-0.4385		503	-0.24
							504	-1.16975		504	-0.63275
							505	-0.61675		505	-1.20725
							506	-0.9075		506	-1.4455
							507	-2.54225		507	-0.7595
							508	-3.21525		508	-0.75075
							509	-2.577		509	-1.4715
							510	-3.5545		510	-1.8305
							511	-4.4275		511	-1.504
							512	-3.03575		512	-0.82625
							513	-1.166		513	-0.00275
							514	1.199		514	0.413
							515	2.8005		515	-0.416
							516	1.733		516	-1.28775
							517	-1.24125		517	-1.48225
							518	-4.033		518	-1.80825
							519	-4.13175		519	-1.385
							520	-2.47575		520	-0.1625
							521	-1.52725		521	0.55225
							522	0.6025		522	1.0095
							523	3.0335		523	1.1135
							524	2.20425		524	0.6685
							525	0.9595		525	0.0815
							526	2.078		526	0.13975
							527	2.385		527	0.006
							528	0.0505		528	-1.1005
							529	-2.6875		529	-1.40425
							530	-2.7015		530	-0.65325
							531	-0.517		531	-0.207
							532	0.471		532	-0.400667
							533			533
							534	0.078		534	-1.31167
							535			535	-1.21333
							536			536
							537	3.03733		537	0.973
							538	1.76175		538	0.30725
							539	0.407		539	-0.25
							540	0.1555		540	-0.59175
							541	-0.7785		541	-1.35775
							542	-1.4395		542	-1.9115
							543	-1.20375		543	-1.1655
							544	-1.149		544	-0.2545
							545	-0.61175		545	-0.18775
							546	-0.137667		546	-0.245667
							547			547

## Sheet: Figure 4
panel b			panel d										panel e										panel f
			time	data 1	fit 1	data 2	fit 2	data 3	fit 3	data 4	fit 4		time	data 1	fit 1	data 2	fit 2	data 3	fit 3	data 4	fit 4		time	data 1	fit 1	data 2	fit 2	data 3	fit 3	data 4	fit 4
residue no.	intensity ratio		0	0.034219	0.041273	0.008395	0.00777	0.004635	0.004366	0.001545	0.003672		0	-0.0076483	0.00170869	-0.0099745	-0.00016427	0.00248793	0.00582692	0.00600967	0.00549043		0	0.005106	0.04896	0.008104	0.044241	0.004351	0.019124	0.002507	-0.00092
660			0.2	0.043131	0.056859	0.012505	0.015497	0.005782	0.006447	0.00248	0.004887		0.2	-0.0079135	0.00218395	-0.0100164	0.000176856	0.00248615	0.00604818	0.00560724	0.00564965		0.2	0.008687	0.050547	0.010912	0.045666	0.005374	0.02064	0.003716	0.001639
661			0.4	0.054162	0.071856	0.017634	0.023086	0.007047	0.008516	0.00334	0.006098		0.4	-0.0077986	0.00265575	-0.0097615	0.000515731	0.00242395	0.00626723	0.00552508	0.00580683		0.4	0.012647	0.05212	0.013755	0.047077	0.006312	0.022137	0.004881	0.004104
662			0.6	0.06669	0.086287	0.023442	0.03054	0.008694	0.010574	0.004965	0.007305		0.6	-0.0072196	0.00312412	-0.0092428	0.000852372	0.00261001	0.00648412	0.00583847	0.00596198		0.6	0.017041	0.053677	0.017563	0.048473	0.007456	0.023615	0.006373	0.006476
663			0.8	0.0806	0.100173	0.029873	0.037861	0.010532	0.012621	0.006763	0.008509		0.8	-0.006417	0.00358908	-0.0087314	0.0011868	0.00327003	0.00669884	0.00605395	0.00611513		0.8	0.021853	0.05522	0.021389	0.049855	0.009503	0.025074	0.008243	0.008759
664	0.650097		1	0.095171	0.113535	0.036874	0.045052	0.012258	0.014657	0.00789	0.009708		1	-0.0052646	0.00405066	-0.0081279	0.00151901	0.00390131	0.00691143		0.00626631		1	0.02654	0.056748	0.025763	0.051223	0.011587	0.026515	0.010429	0.010959
665	0.72463		1.2	0.110797	0.126392	0.044599	0.052114	0.014374	0.016683	0.009212	0.010904		1.2	-0.0041003	0.00450889	-0.0073433	0.00184905	0.00391219	0.00712191	0.00602304	0.00641555		1.2	0.031441	0.058262	0.030136	0.052577	0.013737	0.027939	0.012308	0.013077
666			1.4	0.127011	0.138764	0.052497	0.059051	0.016851	0.018698	0.010932	0.012096		1.4	-0.0026507	0.00496379	-0.0064583	0.00217691	0.00447627	0.0073303	0.00621185	0.00656287		1.4	0.037197	0.059761	0.034563	0.053917	0.016302	0.029344	0.014375	0.015119
667	0.594308		1.6	0.143222	0.15067	0.060133	0.065865	0.019069	0.020702	0.012118	0.013284		1.6	-0.001606	0.00541539	-0.0054314	0.00250261	0.00503494	0.00753663	0.00653298	0.0067083		1.6	0.042266	0.061247	0.038552	0.055243	0.018742	0.030731	0.016542	0.017087
668			1.8	0.15854	0.162126	0.067562	0.072558	0.021282	0.022695	0.013338	0.014468		1.8	-0.0003281	0.00586371	-0.0045335	0.00282617	0.00568823	0.00774091	0.00684027	0.00685187		1.8	0.047051	0.062718	0.042528	0.056555	0.021664	0.032102	0.018615	0.018985
669	0.4033		2	0.17317	0.17315	0.074804	0.079131	0.023832	0.024678	0.014687	0.015649		2	0.00108135	0.00630878	-0.0034335	0.0031476	0.00627654	0.00794316	0.00698384	0.00699359		2	0.051239	0.064175	0.046599	0.057854	0.024552	0.033455	0.020221	0.020815
670	0.329949		2.2	0.186374	0.183759	0.081486	0.085587	0.026292	0.026651	0.015768	0.016825		2.2	0.00237235	0.00675062	-0.0026722	0.00346693	0.00684461	0.00814342	0.00681469	0.00713349		2.2	0.055172	0.065619	0.050319	0.059139	0.027547	0.034791	0.022197	0.022582
671	0.328077		2.4	0.199225	0.193967	0.088018	0.091929	0.028586	0.028613	0.017043	0.017998		2.4	0.00329609	0.00718927	-0.001963	0.00378415	0.00728705	0.00834169	0.00706041	0.0072716		2.4	0.058274	0.067049	0.053552	0.060412	0.029602	0.036111	0.023018	0.024287
672	0.271572		2.6	0.21153	0.203792	0.094437	0.098158	0.030458	0.030564	0.018479	0.019167		2.6	0.00390891	0.00762473	-0.0011492	0.0040993	0.00799295	0.008538	0.00738334	0.00740794		2.6	0.06188	0.068465	0.056772	0.061671	0.032451	0.037414	0.024774	0.025934
673	0.198732		2.8	0.223012	0.213246	0.100682	0.104276	0.032128	0.032505	0.01978	0.020333		2.8	0.0041376	0.00805704	-0.0005209	0.00441237	0.00815494	0.00873237	0.00735238	0.00754254		2.8	0.065286	0.069868	0.059793	0.062917	0.035126	0.038701	0.026228	0.027524
674	0.309126		3	0.233777	0.222344	0.106679	0.110285	0.033882	0.034436	0.020905	0.021494		3	0.00507421	0.00848623	0.00093871	0.0047234	0.008433	0.00892482	0.00772017	0.00767541		3	0.067912	0.071258	0.06214	0.064151	0.037814	0.039971	0.027757	0.029061
675	0.285611		3.2	0.243864	0.2311	0.112819	0.116188	0.035706	0.036357	0.021828	0.022652		3.2	0.0056741	0.0089123	0.00181557	0.00503238	0.00835348	0.00911537	0.00776516	0.00780658		3.2	0.070741	0.072634	0.064608	0.065372	0.04035	0.041226	0.029149	0.030547
676	0.279567		3.4	0.253628	0.239526	0.118657	0.121985	0.037537	0.038268	0.023188	0.023807		3.4	0.00675766	0.0093353	0.00326448	0.00533934	0.0091176	0.00930404	0.00835673	0.00793608		3.4	0.073607	0.073998	0.066806	0.06658	0.042261	0.042465	0.030534	0.031983
677	0.307037		3.6	0.26285	0.247635	0.124523	0.12768	0.039387	0.040168	0.024383	0.024957		3.6	0.0072907	0.00975524	0.00380501	0.0056443	0.00930512	0.00949085	0.00826261	0.00806392		3.6	0.076142	0.075349	0.068745	0.067776	0.044071	0.043689	0.031959	0.033373
678	0.292731		3.8	0.271457	0.25544	0.130198	0.133274	0.041508	0.042059	0.025769	0.026104		3.8	0.0072407	0.0101721	0.00382794	0.00594725	0.0095298	0.00967581	0.00824682	0.00819013		3.8	0.078743	0.076687	0.07045	0.06896	0.046107	0.044898	0.033583	0.034718
679	0		4	0.279383	0.262951	0.136088	0.138768	0.0435	0.043939	0.026977	0.027247		4	0.00746775	0.010586	0.00435413	0.00624823	0.0098276	0.00985896	0.00807291	0.00831473		4	0.080777	0.078013	0.072775	0.070131	0.047862	0.046091	0.035126	0.036021
680	0.264237		4.2	0.286959	0.27018	0.141534	0.144164	0.045389	0.045809	0.028059	0.028387		4.2	0.00738623	0.010997	0.00422296	0.00654724	0.00945611	0.0100403	0.00789005	0.00843775		4.2	0.083317	0.079326	0.075478	0.071291	0.049946	0.04727	0.036855	0.037282
681	0.334652		4.4	0.294525	0.277138	0.147227	0.149465	0.047231	0.04767	0.029274	0.029523		4.4	0.00833311	0.0114049	0.0050812	0.00684429	0.0100138	0.0102199	0.00863993	0.00855919		4.4	0.085212	0.080627	0.077088	0.072439	0.051452	0.048433	0.038054	0.038504
682	0.375949		4.6	0.301483	0.283834	0.152754	0.154671	0.04949	0.04952	0.031273	0.030655		4.6	0.00926466	0.0118099	0.0053457	0.0071394	0.0105251	0.0103977	0.00882807	0.00867909		4.6	0.087039	0.081915	0.079003	0.073575	0.05363	0.049583	0.039752	0.039689
683	0.297394		4.8	0.308067	0.290279	0.158411	0.159786	0.051138	0.051361	0.032715	0.031784		4.8	0.010111	0.012212	0.00581598	0.00743259	0.0111994	0.0105737	0.00878345	0.00879746		4.8	0.088875	0.083192	0.080421	0.074699	0.056069	0.050718	0.041532	0.040837
684	0.308894		5	0.314126	0.296483	0.163952	0.164809	0.053273	0.053192	0.033727	0.032909		5	0.0109149	0.0126112	0.00627626	0.00772386	0.0112302	0.010748	0.0086174	0.00891433		5	0.090099	0.084456	0.08225	0.075812	0.057146	0.051839	0.042815	0.041952
685	0.339217		5.2	0.320155	0.302454	0.169544	0.169743	0.055384	0.055014	0.035167	0.03403		5.2	0.011922	0.0130075	0.00715436	0.00801324	0.0112917	0.0109206	0.00913325	0.00902971		5.2	0.092104	0.085709	0.083914	0.076914	0.05877	0.052946	0.043653	0.043033
686	0.228769		5.4	0.325852	0.308201	0.174897	0.17459	0.057583	0.056826	0.03676	0.035148		5.4	0.0128571	0.013401	0.00779747	0.00830073	0.0118277	0.0110916	0.00961125	0.00914362		5.4	0.094633	0.086949	0.085403	0.078004	0.06049	0.054039	0.044903	0.044083
687	0.262929		5.6	0.330777	0.313733	0.179721	0.179351	0.05929	0.058628	0.037966	0.036263		5.6	0.0134261	0.0137916	0.00848485	0.00858634	0.0122782	0.0112608	0.0100535	0.00925609		5.6	0.096022	0.088179	0.086751	0.079084	0.062058	0.055119	0.046288	0.045103
688	0.262271		5.8	0.335433	0.319058	0.185013	0.184027	0.061486	0.060421	0.039403	0.037373		5.8	0.0140095	0.0141794	0.00886562	0.0088701	0.0123633	0.0114284	0.0102469	0.00936714		5.8	0.097774	0.089396	0.088736	0.080152	0.064115	0.056186	0.046956	0.046094
689	0.308159		6	0.340352	0.324184	0.1903	0.18862	0.063724	0.062204	0.040864	0.038481		6	0.0146431	0.0145645	0.00963253	0.00915201	0.0129025	0.0115943	0.0102444	0.00947677		6	0.099664	0.090603	0.090272	0.081209	0.065388	0.057239	0.047487	0.047057
690	0.306102		6.2	0.344468	0.329119	0.194983	0.193132	0.065844	0.063978	0.04185	0.039584		6.2	0.015217	0.0149467	0.00995414	0.00943209	0.0131632	0.0117587	0.00988649	0.00958502		6.2	0.101292	0.091798	0.091436	0.082256	0.066515	0.058279	0.048295	0.047994
691	0.432136		6.4	0.348206	0.333869	0.199672	0.197564	0.067442	0.065742	0.042867	0.040684		6.4	0.015445	0.0153263	0.0101492	0.00971034	0.0127326	0.0119214	0.00939138	0.00969189		6.4	0.102295	0.092981	0.092734	0.083292	0.067639	0.059306	0.049193	0.048906
692	0.277283		6.6	0.351872	0.338442	0.204624	0.201918	0.0694	0.067497	0.04391	0.041781		6.6	0.0166581	0.0157031	0.0109925	0.00998679	0.0132785	0.0120825	0.00946922	0.00979742		6.6	0.103673	0.094154	0.094409	0.084317	0.068426	0.06032	0.050297	0.049793
693			6.8	0.355486	0.342844	0.209489	0.206194	0.07123	0.069243	0.045044	0.042874		6.8	0.0175089	0.0160772	0.0119668	0.0102614	0.0135327	0.0122421	0.0098561	0.00990161		6.8	0.104979	0.095316	0.09588	0.085332	0.06926	0.061322	0.051184	0.050656
694			7	0.359256	0.347082	0.214424	0.210395	0.073616	0.070979	0.046126	0.043964		7	0.018087	0.0164486	0.0133876	0.0105343	0.0137012	0.0124001	0.010119	0.0100045		7	0.106477	0.096467	0.096998	0.086337	0.070442	0.062312	0.052006	0.051498
695	0.274553		7.2	0.362406	0.351163	0.218959	0.214521	0.075545	0.072707	0.047638	0.04505		7.2	0.0185548	0.0168174	0.0136787	0.0108054	0.0139293	0.0125565	0.0101534	0.0101061		7.2	0.107881	0.097607	0.098434	0.087331	0.071212	0.063289	0.052829	0.052318
696	0.292242		7.4	0.365161	0.355091	0.223261	0.218574	0.076718	0.074425	0.048823	0.046133		7.4	0.019033	0.0171835	0.0140245	0.0110748	0.0141299	0.0127115	0.0105582	0.0102063		7.4	0.109509	0.098736	0.099888	0.088316	0.071466	0.064254	0.053468	0.053117
697	0.306181		7.6	0.367944	0.358873	0.227628	0.222556	0.078543	0.076134	0.049718	0.047212		7.6	0.0192742	0.017547	0.0139305	0.0113424	0.014196	0.0128649	0.0107336	0.0103054		7.6	0.110933	0.099855	0.100656	0.08929	0.07225	0.065208	0.054009	0.053897
698	0.215822		7.8	0.370472	0.362515	0.231871	0.226467	0.080239	0.077834	0.050473	0.048288		7.8	0.0197085	0.0179079	0.0141227	0.0116082	0.0147447	0.0130168	0.0109114	0.0104032		7.8	0.111975	0.100964	0.101645	0.090255	0.073026	0.066149	0.054622	0.054658
699	0.293896		8	0.372888	0.366022	0.235769	0.230309	0.081398	0.079525	0.051516	0.04936		8	0.0201987	0.0182663	0.0149107	0.0118724	0.0150455	0.0131673	0.0109282	0.0104997		8	0.113365	0.102062	0.102627	0.09121	0.074007	0.067079	0.055549	0.0554
700	0.325659		8.2	0.374924	0.369398	0.239363	0.234082	0.082496	0.081207	0.052139	0.050429		8.2	0.0204489	0.018622	0.0146845	0.0121348	0.0149481	0.0133163	0.0108987	0.0105951		8.2	0.114575	0.10315	0.1035	0.092155	0.074991	0.067997	0.056152	0.056125
701	0.288876		8.4	0.377283	0.372649	0.243207	0.23779	0.084563	0.082881	0.053423	0.051495		8.4	0.0211581	0.0189753	0.0149118	0.0123955	0.0155054	0.0134639	0.0109597	0.0106892		8.4	0.115669	0.104228	0.104293	0.09309	0.076407	0.068905	0.056866	0.056834
702	0.312411		8.6	0.379484	0.37578	0.246463	0.241431	0.08625	0.084545	0.054576	0.052557		8.6	0.0213748	0.019326	0.0145289	0.0126546	0.0153531	0.01361	0.0104596	0.0107822		8.6	0.116886	0.105296	0.105073	0.094016	0.077552	0.069801	0.057754	0.057526
703			8.8	0.381563	0.378796	0.250032	0.245008	0.087676	0.086201	0.055581	0.053615		8.8	0.0218948	0.0196742	0.0150675	0.012912	0.0151834	0.0137547	0.0106581	0.0108739		8.8	0.117932	0.106354	0.106319	0.094933	0.078429	0.070685	0.058456	0.058203
704			9	0.383151	0.381699	0.253059	0.248522	0.089112	0.087848	0.056035	0.054671		9	0.0222031	0.0200199	0.0149023	0.0131677	0.0147622	0.013898	0.010587	0.0109646		9	0.119161	0.107402	0.107532	0.09584	0.079478	0.071559	0.059412	0.058865
705			9.2	0.384718	0.384496	0.25637	0.251974	0.090337	0.089486	0.056697	0.055723		9.2	0.0228693	0.0203632	0.0150717	0.0134218	0.0146172	0.01404	0.0107079	0.0110541		9.2	0.120926	0.10844	0.108507	0.096739	0.080861	0.072423	0.060291	0.059513
706	0.286848		9.4	0.386233	0.387189	0.259554	0.255365	0.091502	0.091115	0.057524	0.056771		9.4	0.0229522	0.020704	0.0152914	0.0136742	0.0146723	0.0141805	0.010414	0.0111425		9.4	0.122391	0.109469	0.109416	0.097628	0.081755	0.073275	0.061385	0.060147
707			9.6	0.387874	0.389784	0.26323	0.258696	0.093166	0.092736	0.058655	0.057817		9.6	0.0233507	0.0210424	0.0159243	0.013925	0.014888	0.0143197	0.0107811	0.0112298		9.6	0.123117	0.110488	0.109748	0.098508	0.082564	0.074118	0.062105	0.060768
708	0.270538		9.8	0.389884	0.392282	0.267178	0.261969	0.094783	0.094349	0.059127	0.058859		9.8	0.0237088	0.0213784	0.0163672	0.0141742	0.0150944	0.0144576	0.0109964	0.0113159		9.8	0.124307	0.111498	0.110677	0.099379	0.083404	0.074949	0.062008	0.061376
709	0.210541		10	0.391286	0.394689	0.270735	0.265183	0.096011	0.095953	0.060047	0.059897		10	0.0244934	0.021712	0.0168184	0.0144218	0.0157096	0.0145941	0.0110497	0.0114011		10	0.125056	0.112498	0.111041	0.100242	0.083754	0.075771	0.061988	0.061972
710	0.355206		10.2	0.392376	0.397008	0.273724	0.268341	0.097773	0.097548	0.060946	0.060933		10.2	0.0252032	0.0220432	0.0165773	0.0146678	0.0155369	0.0147293	0.0107857	0.0114851		10.2	0.125664	0.113489	0.111742	0.101096	0.084422	0.076583	0.062622	0.062556
711	0.275733		10.4	0.39412	0.399242	0.27734	0.271443	0.099293	0.099135	0.061814	0.061965		10.4	0.0259355	0.0223721	0.0168684	0.0149122	0.0155742	0.0148632	0.0110281	0.0115681		10.4	0.125834	0.114471	0.112613	0.101941	0.085115	0.077384	0.063324	0.063129
712	0.267437		10.6	0.395823	0.401394	0.280982	0.274491	0.101239	0.100714	0.062905	0.062993		10.6	0.0271143	0.0226986	0.017425	0.0151551	0.0161659	0.0149959	0.0113565	0.0116501		10.6	0.126643	0.115444	0.113416	0.102778	0.085397	0.078176	0.063663	0.063691
713	0.258053		10.8	0.397414	0.403467	0.284447	0.277484	0.102691	0.102284	0.06407	0.064019		10.8	0.0274274	0.0230228	0.0179923	0.0153964	0.0162747	0.0151272	0.0112523	0.0117311		10.8	0.127499	0.116408	0.113982	0.103606	0.08629	0.078958	0.06401	0.064242
714	0.237462		11	0.399298	0.405464	0.287831	0.280425	0.104689	0.103846	0.065307	0.065041		11	0.0276024	0.0233448	0.0184094	0.0156361	0.0163856	0.0152573	0.0113619	0.011811		11	0.128558	0.117363	0.11462	0.104426	0.087391	0.079731	0.064129	0.064784
715	0.287692		11.2	0.400769	0.407389	0.291175	0.283315	0.106184	0.1054	0.067212	0.06606		11.2	0.027775	0.0236644	0.0183781	0.0158743	0.0164944	0.0153862	0.0116252	0.01189		11.2	0.129415	0.118309	0.115421	0.105238	0.087595	0.080494	0.064274	0.065316
716	0		11.4	0.402727	0.409244	0.294708	0.286153	0.107784	0.106946	0.068196	0.067076		11.4	0.0282857	0.0239818	0.0188656	0.016111	0.0168067	0.0155138	0.0119834	0.0119679		11.4	0.130598	0.119246	0.116004	0.106042	0.087862	0.081248	0.064756	0.065838
717	0.198355		11.6	0.404526	0.411032	0.297409	0.288941	0.109565	0.108483	0.069715	0.068088		11.6	0.0289403	0.024297	0.0197926	0.0163462	0.0171482	0.0156402	0.0124984	0.0120449		11.6	0.131627	0.120175	0.116204	0.106838	0.088589	0.081992	0.065242	0.066351
718	0.295565		11.8	0.405988	0.412754	0.300007	0.291681	0.111086	0.110012	0.070998	0.069097		11.8	0.0292937	0.0246099	0.0205701	0.0165798	0.0172752	0.0157653	0.0124887	0.012121		11.8	0.132771	0.121095	0.117115	0.107625	0.089031	0.082728	0.065697	0.066855
719	0.382695		12	0.407111	0.414415	0.302405	0.294372	0.112381	0.111534	0.07251	0.070103		12	0.0290395	0.0249206	0.0204256	0.016812	0.0172013	0.0158893	0.0122867	0.0121961		12	0.133443	0.122007	0.117907	0.108405	0.089759	0.083454	0.066105	0.067351
720	0.388461		12.2	0.408296	0.416015	0.304906	0.297016	0.113868	0.113047	0.073908	0.071106		12.2	0.0291506	0.0252291	0.0205867	0.0170427	0.0168207	0.0160121	0.0120456	0.0122703		12.2	0.134087	0.12291	0.118515	0.109177	0.090284	0.084172	0.066415	0.067839
			12.4	0.409686	0.417558	0.307285	0.299613	0.115714	0.114552	0.075162	0.072105		12.4	0.0291806	0.0255354	0.0208577	0.0172719	0.0167106	0.0161338	0.0120325	0.0123436		12.4	0.135333	0.123805	0.119865	0.109941	0.091162	0.084881	0.067607	0.068319
			12.6	0.410492	0.419045	0.309213	0.302165	0.117083	0.116049	0.07596	0.073102		12.6	0.0292033	0.0258396	0.0213703	0.0174996	0.0162672	0.0162542	0.0117401	0.0124159		12.6	0.136378	0.124692	0.120546	0.110698	0.091509	0.085581	0.068403	0.068792
			12.8	0.411138	0.420478	0.311518	0.304672	0.118211	0.117539	0.076784	0.074095		12.8	0.0297862	0.0261416	0.0221905	0.0177259	0.0161356	0.0163736	0.0122195	0.0124874		12.8	0.136517	0.125571	0.1211	0.111447	0.091926	0.086273	0.069177	0.069257
			13	0.411348	0.421861	0.313531	0.307134	0.119419	0.119021	0.077078	0.075085		13	0.0298179	0.0264415	0.0222721	0.0179508	0.0161759	0.0164918	0.0120694	0.012558		13	0.137057	0.126441	0.121185	0.112189	0.092433	0.086956	0.069794	0.069714
			13.2	0.411759	0.423194	0.315579	0.309554	0.120741	0.120494	0.077993	0.076072		13.2	0.02997	0.0267393	0.0229495	0.0181742	0.0164009	0.0166088	0.0120534	0.0126278		13.2	0.137169	0.127304	0.121674	0.112923	0.092098	0.087631	0.070494	0.070165
			13.4	0.412369	0.424479	0.318025	0.311931	0.122029	0.12196	0.079273	0.077056		13.4	0.0302214	0.027035	0.0235716	0.0183962	0.0171284	0.0167248	0.0121547	0.0126966		13.4	0.137378	0.128159	0.1219	0.11365	0.092135	0.088298	0.071062	0.07061
			13.6	0.413239	0.425719	0.320622	0.314267	0.123652	0.123419	0.080382	0.078036		13.6	0.0307821	0.0273286	0.0238504	0.0186168	0.0174564	0.0168396	0.0126062	0.0127647		13.6	0.13788	0.129005	0.121808	0.114369	0.092759	0.088957	0.071654	0.071048
			13.8	0.413981	0.426914	0.322854	0.316561	0.125065	0.124869	0.081388	0.079014		13.8	0.0313803	0.0276202	0.0236622	0.018836	0.0179263	0.0169534	0.0128979	0.0128319		13.8	0.13899	0.129845	0.122779	0.115082	0.093616	0.089608	0.072267	0.071479
			14	0.414569	0.428068	0.324923	0.318816	0.126251	0.126312	0.082711	0.079988		14	0.0317978	0.0279097	0.0234286	0.0190538	0.0178282	0.0170661	0.0127949	0.0128982		14	0.139297	0.130676	0.122991	0.115787	0.093941	0.090251	0.072363	0.071905
			14.2	0.415407	0.42918	0.326927	0.32103	0.128106	0.127748	0.083769	0.080959		14.2	0.0318692	0.0281972	0.0233532	0.0192702	0.0177319	0.0171777	0.0123688	0.0129638		14.2	0.140124	0.1315	0.123329	0.116486	0.094546	0.090886	0.073488	0.072325
			14.4	0.416215	0.430254	0.329289	0.323206	0.129413	0.129176	0.084413	0.081928		14.4	0.0323135	0.0284827	0.0241882	0.0194852	0.0181479	0.0172883	0.0125728	0.0130286		14.4	0.140184	0.132316	0.123434	0.117177	0.095013	0.091514	0.073512	0.072739
			14.6	0.416975	0.431289	0.33193	0.325344	0.131151	0.130596	0.085625	0.082893		14.6	0.0324975	0.0287661	0.0242981	0.0196989	0.0182455	0.0173979	0.0119997	0.0130925		14.6	0.14157	0.133125	0.124293	0.117862	0.095892	0.092134	0.074042	0.073147
			14.8	0.417696	0.432289	0.333983	0.327445	0.132635	0.132009	0.086702	0.083855		14.8	0.0326153	0.0290476	0.0243822	0.0199112	0.0183675	0.0175064	0.0118277	0.0131557		14.8	0.142157	0.133926	0.124722	0.11854	0.096757	0.092746	0.074223	0.07355
			15	0.41894	0.433253	0.336103	0.329509	0.134312	0.133414	0.087874	0.084814		15	0.0325954	0.0293271	0.0240843	0.0201222	0.0188254	0.0176138	0.0122357	0.0132182		15	0.142823	0.134721	0.125206	0.119211	0.097237	0.093351	0.07466	0.073948
			15.2	0.420275	0.434184	0.338342	0.331536	0.135897	0.134812	0.088986	0.085769		15.2	0.0330877	0.0296047	0.0241414	0.0203318	0.0189083	0.0177203	0.01275	0.0132798		15.2	0.143496	0.135507	0.125941	0.119875	0.097954	0.093949	0.0748	0.074341
			15.4	0.421401	0.435083	0.340084	0.333529	0.137591	0.136203	0.089983	0.086722		15.4	0.0338245	0.0298803	0.02422	0.0205402	0.0193539	0.0178258	0.0133149	0.0133408		15.4	0.144448	0.136287	0.127011	0.120533	0.098383	0.09454	0.075565	0.074729
			15.6	0.42253	0.43595	0.341845	0.335486	0.139176	0.137586	0.09119	0.087672		15.6	0.034348	0.030154	0.0242791	0.0207472	0.0192442	0.0179303	0.0134961	0.0134009		15.6	0.145724	0.13706	0.127672	0.121184	0.098949	0.095123	0.07615	0.075112
			15.8	0.422772	0.436788	0.343286	0.337409	0.140025	0.138962	0.091519	0.088619		15.8	0.0345064	0.0304258	0.0244991	0.0209529	0.0193339	0.0180338	0.0136573	0.0134604		15.8	0.146686	0.137826	0.128273	0.121829	0.099648	0.095699	0.076764	0.075491
			16	0.423387	0.437597	0.345123	0.339299	0.141031	0.140331	0.092367	0.089563		16	0.034786	0.0306956	0.0245186	0.0211573	0.019416	0.0181363	0.0138012	0.0135191		16	0.146689	0.138584	0.128424	0.122468	0.099851	0.096269	0.07674	0.075865
			16.2	0.424313	0.438378	0.347131	0.341156	0.14209	0.141693	0.093012	0.090503		16.2	0.0346858	0.0309637	0.0251346	0.0213604	0.0191995	0.0182379	0.0141404	0.0135772		16.2	0.147575	0.139336	0.128862	0.1231	0.100225	0.096832	0.077238	0.076234
			16.4	0.424989	0.439133	0.348532	0.34298	0.143467	0.143047	0.093655	0.091441		16.4	0.0350479	0.0312298	0.0256142	0.0215622	0.0193594	0.0183385	0.0142815	0.0136345		16.4	0.148782	0.140081	0.13002	0.123726	0.100709	0.097388	0.077771	0.0766
			16.6	0.425274	0.439862	0.349465	0.344773	0.144575	0.144394	0.093894	0.092376		16.6	0.035579	0.0314941	0.02625	0.0217628	0.0195145	0.0184382	0.0147244	0.0136911		16.6	0.148666	0.140819	0.130059	0.124346	0.100455	0.097937	0.07769	0.076961
			16.8	0.425577	0.440566	0.350796	0.346534	0.14539	0.145735	0.094347	0.093308		16.8	0.0364181	0.0317565	0.0268489	0.0219621	0.0201226	0.0185369	0.0152346	0.0137471		16.8	0.148619	0.141551	0.130557	0.12496	0.100642	0.09848	0.077669	0.077318
			17	0.42574	0.441247	0.352229	0.348265	0.146824	0.147068	0.094888	0.094237		17	0.0364976	0.0320172	0.026629	0.0221601	0.0202972	0.0186348	0.0152551	0.0138024		17	0.149275	0.142276	0.131118	0.125568	0.101182	0.099016	0.07796	0.077671
			17.2	0.425844	0.441905	0.353328	0.349966	0.147744	0.148394	0.095471	0.095162		17.2	0.0369412	0.032276	0.0267006	0.0223569	0.0203653	0.0187317	0.0152541	0.013857		17.2	0.150133	0.142994	0.131536	0.12617	0.101235	0.099546	0.078651	0.078021
			17.4	0.426641	0.442541	0.355212	0.351637	0.149505	0.149713	0.096729	0.096085		17.4	0.0372253	0.032533	0.0266058	0.0225525	0.0209349	0.0188277	0.0154216	0.0139109		17.4	0.151074	0.143706	0.13174	0.126765	0.101623	0.100069	0.078807	0.078366
			17.6	0.42719	0.443155	0.356759	0.353279	0.150878	0.151026	0.097676	0.097005		17.6	0.0371587	0.0327883	0.026527	0.0227468	0.0206668	0.0189229	0.0155405	0.0139643		17.6	0.151805	0.144412	0.132268	0.127356	0.101966	0.100587	0.079408	0.078708
			17.8	0.427706	0.44375	0.358241	0.354893	0.152157	0.152331	0.098755	0.097923		17.8	0.0373563	0.0330418	0.0263006	0.0229399	0.0204925	0.0190171	0.0154864	0.0140169		17.8	0.152347	0.145111	0.132342	0.12794	0.101848	0.101098	0.079537	0.079046
			18	0.428015	0.444325	0.359618	0.356478	0.153107	0.15363	0.099439	0.098837		18	0.0372013	0.0332935	0.0266554	0.0231319	0.0202608	0.0191105	0.0151668	0.014069		18	0.152746	0.145803	0.132552	0.128518	0.10163	0.101603	0.079305	0.079381
			18.2	0.428305	0.444881	0.361244	0.358036	0.154562	0.154921	0.100508	0.099748		18.2	0.0368289	0.0335435	0.0269013	0.0233226	0.020502	0.019203	0.0148598	0.0141204		18.2	0.153633	0.14649	0.133043	0.129091	0.102082	0.102102	0.079653	0.079712
			18.4	0.428683	0.445419	0.362472	0.359567	0.155757	0.156206	0.101473	0.100656		18.4	0.0371665	0.0337917	0.0270421	0.0235121	0.0207608	0.0192947	0.0150245	0.0141713		18.4	0.153923	0.14717	0.133618	0.129659	0.102811	0.102595	0.079418	0.08004
			18.6	0.429416	0.44594	0.363981	0.361072	0.157112	0.157485	0.102913	0.101562		18.6	0.0369392	0.0340382	0.0266008	0.0237004	0.0205472	0.0193855	0.0144133	0.0142215		18.6	0.15484	0.147845	0.134499	0.13022	0.103493	0.103082	0.079839	0.080365
			18.8	0.429808	0.446444	0.365006	0.36255	0.158026	0.158756	0.104113	0.102464		18.8	0.037307	0.0342831	0.0268737	0.0238876	0.0209987	0.0194755	0.0145099	0.0142711		18.8	0.154998	0.148513	0.135022	0.130777	0.1042	0.103564	0.080308	0.080686
			19	0.430332	0.446932	0.366259	0.364003	0.159253	0.160021	0.104938	0.103364		19	0.0373448	0.0345262	0.0263198	0.0240736	0.0210408	0.0195646	0.0146423	0.0143201		19	0.155848	0.149175	0.135813	0.131328	0.105098	0.104039	0.081025	0.081005
			19.2	0.431	0.447404	0.367286	0.365431	0.160538	0.161279	0.106023	0.104261		19.2	0.0378867	0.0347677	0.0263563	0.0242584	0.0210435	0.019653	0.0149675	0.0143686		19.2	0.156544	0.149831	0.13648	0.131873	0.106161	0.104509	0.081079	0.08132
			19.4	0.431742	0.447861	0.368696	0.366834	0.161903	0.162531	0.107413	0.105155		19.4	0.0381825	0.0350075	0.0262223	0.0244421	0.021146	0.0197405	0.0150505	0.0144165		19.4	0.156858	0.150482	0.13685	0.132413	0.106135	0.104974	0.081817	0.081632
			19.6	0.431863	0.448305	0.369964	0.368212	0.162989	0.163776	0.108071	0.106046		19.6	0.038643	0.0352457	0.0263732	0.0246247	0.020886	0.0198272	0.0148498	0.0144638		19.6	0.157358	0.151126	0.136968	0.132948	0.106801	0.105433	0.082474	0.081941
			19.8	0.431693	0.448734	0.370953	0.369567	0.163395	0.165014	0.108625	0.106934		19.8	0.03912	0.0354822	0.0269472	0.0248061	0.0214991	0.0199132	0.0152601	0.0145106		19.8	0.157868	0.151765	0.137481	0.133478	0.107797	0.105887	0.083379	0.082248
			20	0.432531	0.44915	0.372589	0.370899	0.164865	0.166246	0.109712	0.10782		20	0.0390316	0.0357171	0.0270071	0.0249864	0.0212725	0.0199983	0.0152079	0.0145568		20	0.158278	0.152398	0.137593	0.134003	0.107818	0.106335	0.083436	0.082551
			20.2	0.432986	0.449553	0.373677	0.372208	0.16606	0.167472	0.110428	0.108702		20.2	0.0390157	0.0359504	0.0273441	0.0251655	0.0210723	0.0200827	0.0152507	0.0146025		20.2	0.15923	0.153026	0.138421	0.134522	0.108293	0.106778	0.084184	0.082852
			20.4	0.433263	0.449944	0.374045	0.373494	0.16699	0.168691	0.111182	0.109582		20.4	0.0400959	0.0361821	0.0283014	0.0253436	0.0214332	0.0201663	0.0157248	0.0146476		20.4	0.159955	0.153648	0.138982	0.135037	0.108716	0.107216	0.084784	0.08315
			20.6	0.433701	0.450323	0.374959	0.374758	0.16794	0.169903	0.111795	0.110459		20.6	0.0405468	0.0364122	0.0286807	0.0255205	0.0217433	0.0202491	0.0162657	0.0146922		20.6	0.159858	0.154264	0.139109	0.135546	0.108549	0.107649	0.085202	0.083446
			20.8	0.434112	0.450691	0.376201	0.376	0.169054	0.17111	0.112606	0.111334		20.8	0.0408373	0.0366407	0.0286301	0.0256964	0.0218692	0.0203312	0.0161616	0.0147363		20.8	0.160643	0.154875	0.140149	0.136051	0.109296	0.108076	0.085763	0.083738
			21	0.434482	0.451048	0.377041	0.377221	0.170462	0.17231	0.112917	0.112205		21	0.0409378	0.0368677	0.0282954	0.0258711	0.0217654	0.0204126	0.0161158	0.0147799		21	0.160716	0.15548	0.140254	0.136551	0.109152	0.108499	0.086112	0.084028
			21.2	0.435261	0.451394	0.378124	0.378421	0.171949	0.173504	0.113346	0.113074		21.2	0.040897	0.0370931	0.0283047	0.0260448	0.0217839	0.0204932	0.0159729	0.0148229		21.2	0.160671	0.15608	0.139915	0.137046	0.108619	0.108917	0.085899	0.084316
			21.4	0.436208	0.45173	0.379498	0.3796	0.173676	0.174691	0.114553	0.11394		21.4	0.0402159	0.037317	0.0283157	0.0262174	0.0216399	0.020573	0.0155464	0.0148655		21.4	0.160724	0.156675	0.140074	0.137536	0.108559	0.109329	0.085881	0.084601
			21.6	0.43633	0.452057	0.380552	0.380759	0.174708	0.175872	0.11515	0.114803		21.6	0.0395155	0.0375394	0.0282143	0.026389	0.0209849	0.0206522	0.0146943	0.0149076		21.6	0.160459	0.157264	0.139599	0.138021	0.10797	0.109737	0.086246	0.084884
			21.8	0.436756	0.452374	0.381442	0.381898	0.176204	0.177047	0.11604	0.115664		21.8	0.0393429	0.0377602	0.0279339	0.0265595	0.0209275	0.0207306	0.0143551	0.0149492		21.8	0.160964	0.157849	0.139721	0.138502	0.108359	0.110141	0.086472	0.085164
			22	0.437093	0.452682	0.382722	0.383018	0.177597	0.178216	0.117192	0.116521		22	0.0390348	0.0379795	0.0283412	0.0267289	0.0210351	0.0208084	0.0140282	0.0149903		22	0.16081	0.158428	0.139834	0.138978	0.108418	0.110539	0.085943	0.085442
			22.2	0.437545	0.452981	0.383777	0.384119	0.178922	0.179379	0.118771	0.117376		22.2	0.0385838	0.0381974	0.0283007	0.0268973	0.0208546	0.0208854	0.0137784	0.0150309		22.2	0.160586	0.159002	0.139971	0.13945	0.108338	0.110933	0.085661	0.085717
			22.4	0.438474	0.453272	0.384599	0.3852	0.180228	0.180536	0.119688	0.118229		22.4	0.0387307	0.0384137	0.0284272	0.0270647	0.0207012	0.0209617	0.0135506	0.0150711		22.4	0.160591	0.15957	0.140268	0.139917	0.108948	0.111322	0.086106	0.08599
			22.6	0.438995	0.453555	0.385881	0.386264	0.181336	0.181687	0.120644	0.119078		22.6	0.0387529	0.0386286	0.0285714	0.027231	0.0207054	0.0210374	0.013581	0.0151108		22.6	0.160627	0.160134	0.140296	0.14038	0.109007	0.111707	0.086171	0.086261
			22.8	0.439244	0.45383	0.386845	0.387309	0.182492	0.182831	0.121602	0.119925		22.8	0.0392915	0.038842	0.0291045	0.0273963	0.0208306	0.0211124	0.0136457	0.0151501		22.8	0.161412	0.160693	0.140785	0.140838	0.109809	0.112087	0.086847	0.08653
			23	0.439592	0.454098	0.387562	0.388336	0.183398	0.18397	0.122462	0.120769		23	0.0393863	0.039054	0.0289105	0.0275606	0.0207663	0.0211867	0.013493	0.0151889		23	0.162429	0.161247	0.141071	0.141292	0.110253	0.112463	0.087316	0.086796
			23.2	0.440098	0.454359	0.388609	0.389346	0.184698	0.185103	0.123365	0.121611		23.2	0.039861	0.0392646	0.0292903	0.0277239	0.0208331	0.0212603	0.013573	0.0152272		23.2	0.162468	0.161796	0.140803	0.141741	0.110373	0.112835	0.086968	0.087061
			23.4	0.440349	0.454612	0.389947	0.390338	0.185884	0.186229	0.124225	0.12245		23.4	0.0404429	0.0394737	0.0294635	0.0278862	0.0209633	0.0213333	0.0136606	0.0152651		23.4	0.163488	0.16234	0.141122	0.142186	0.111034	0.113202	0.087876	0.087323
			23.6	0.439984	0.454859	0.390955	0.391314	0.186502	0.18735	0.124941	0.123286		23.6	0.0411006	0.0396814	0.0300993	0.0280475	0.021146	0.0214056	0.0144477	0.0153026		23.6	0.164463	0.16288	0.141216	0.142627	0.111719	0.113565	0.088045	0.087583
			23.8	0.440443	0.4551	0.392213	0.392273	0.187415	0.188465	0.125575	0.124119		23.8	0.0415417	0.0398877	0.0302491	0.0282079	0.0211189	0.0214773	0.0149103	0.0153397		23.8	0.165545	0.163415	0.141731	0.143064	0.112176	0.113924	0.088723	0.087841
			24	0.440619	0.455334	0.392796	0.393216	0.188603	0.189574	0.126317	0.12495		24	0.0418103	0.0400926	0.030496	0.0283672	0.0207991	0.0215484	0.0152445	0.0153764		24	0.166475	0.163945	0.141547	0.143497	0.112324	0.114278	0.088819	0.088097
			24.2	0.440568	0.455563	0.393254	0.394143	0.189533	0.190678	0.126953	0.125779		24.2	0.0425459	0.0402962	0.0309959	0.0285256	0.0210446	0.0216188	0.0159591	0.0154126		24.2	0.167012	0.16447	0.141946	0.143925	0.112709	0.114629	0.089548	0.088351
			24.4	0.440708	0.455786	0.393708	0.395054	0.19045	0.191775	0.127659	0.126604		24.4	0.0433555	0.0404983	0.0313147	0.028683	0.0213521	0.0216886	0.0167028	0.0154484		24.4	0.16739	0.164991	0.142746	0.14435	0.113028	0.114975	0.089965	0.088603
			24.6	0.440942	0.456004	0.394338	0.39595	0.191514	0.192867	0.128074	0.127427		24.6	0.0433949	0.0406991	0.030782	0.0288394	0.0214862	0.0217578	0.016675	0.0154838		24.6	0.167484	0.165507	0.143469	0.14477	0.11317	0.115318	0.090341	0.088853
			24.8	0.441065	0.456216	0.394546	0.396831	0.192133	0.193953	0.127995	0.128248		24.8	0.0437635	0.0408986	0.0305293	0.0289949	0.0217064	0.0218264	0.0168412	0.0155189		24.8	0.168342	0.166019	0.144562	0.145187	0.114498	0.115657	0.090641	0.089101
			25	0.441465	0.456423	0.394889	0.397696	0.193393	0.195034	0.128304	0.129065		25	0.0438215	0.0410967	0.0306389	0.0291494	0.0217856	0.0218944	0.0163725	0.0155535		25	0.168407	0.166526	0.145011	0.145599	0.1147	0.115992	0.090941	0.089347
			25.2	0.442053	0.456625	0.395801	0.398547	0.194856	0.196109	0.129342	0.129881		25.2	0.0436453	0.0412934	0.0308329	0.0293031	0.021917	0.0219618	0.0165243	0.0155877		25.2	0.168698	0.167029	0.145345	0.146008	0.115338	0.116323	0.09143	0.089591
			25.4	0.442346	0.456823	0.396436	0.399384	0.195979	0.197178	0.130442	0.130693		25.4	0.0434573	0.0414889	0.0307971	0.0294557	0.0215348	0.0220286	0.0161935	0.0156216		25.4	0.169074	0.167527	0.146356	0.146413	0.115918	0.11665	0.091751	0.089833
			25.6	0.442936	0.457016	0.397448	0.400207	0.197507	0.198242	0.131489	0.131503		25.6	0.0433392	0.0416831	0.0309248	0.0296075	0.0217852	0.0220948	0.0158908	0.0156551		25.6	0.169088	0.168022	0.147155	0.146814	0.116524	0.116973	0.09247	0.090073
			25.8	0.444079	0.457204	0.398148	0.401016	0.198976	0.1993	0.132792	0.132311		25.8	0.0439253	0.0418759	0.0311423	0.0297583	0.0219128	0.0221604	0.0160354	0.0156882		25.8	0.169281	0.168511	0.148284	0.147211	0.117422	0.117293	0.092548	0.090312
			26	0.444788	0.457389	0.399016	0.401811	0.200231	0.200352	0.133762	0.133116		26	0.0440862	0.0420675	0.0313868	0.0299083	0.0220153	0.0222254	0.0157839	0.0157209		26	0.169152	0.168997	0.1487	0.147604	0.117284	0.117609	0.092434	0.090549
			26.2	0.445325	0.457569	0.399489	0.402593	0.201391	0.201399	0.134754	0.133918		26.2	0.0442227	0.0422578	0.0315677	0.0300573	0.0224049	0.0222899	0.0159359	0.0157533		26.2	0.169188	0.169479	0.149005	0.147994	0.117186	0.117922	0.09273	0.090784
			26.4	0.446001	0.457746	0.400344	0.403362	0.202444	0.202441	0.1356	0.134718		26.4	0.0447975	0.0424468	0.0319277	0.0302054	0.0232973	0.0223538	0.016251	0.0157853		26.4	0.169445	0.169956	0.148767	0.14838	0.117487	0.118231	0.092996	0.091017
			26.6	0.446339	0.457919	0.401573	0.404117	0.203613	0.203477	0.136761	0.135515		26.6	0.0453486	0.0426345	0.0324508	0.0303526	0.0235916	0.0224172	0.0167657	0.015817		26.6	0.169147	0.170429	0.148395	0.148763	0.11744	0.118536	0.092835	0.091248
			26.8	0.446696	0.458088	0.402061	0.404861	0.204809	0.204508	0.138193	0.13631		26.8	0.0454778	0.042821	0.0324866	0.030499	0.0236184	0.02248	0.016365	0.0158483		26.8	0.169795	0.170898	0.148829	0.149142	0.118005	0.118838	0.093327	0.091478
			27	0.447056	0.458254	0.402641	0.405592	0.20563	0.205533	0.139287	0.137102		27	0.045358	0.0430063	0.032366	0.0306444	0.023836	0.0225423	0.0158455	0.0158793		27	0.170526	0.171363	0.14906	0.149517	0.118438	0.119137	0.093511	0.091706
			27.2	0.447545	0.458417	0.404069	0.40631	0.207068	0.206553	0.140429	0.137892		27.2	0.045433	0.0431903	0.0326901	0.030789	0.0236412	0.022604	0.0157833	0.01591		27.2	0.171027	0.171824	0.14872	0.149889	0.118774	0.119432	0.093554	0.091933
			27.4	0.447936	0.458576	0.405124	0.407017	0.208134	0.207568	0.141412	0.138679		27.4	0.0457958	0.0433731	0.0332087	0.0309327	0.0239792	0.0226652	0.016046	0.0159403		27.4	0.171614	0.172281	0.148634	0.150258	0.119278	0.119724	0.094031	0.092157
			27.6	0.448135	0.458732	0.405516	0.407712	0.209098	0.208578	0.142016	0.139464		27.6	0.0461955	0.0435547	0.0335369	0.0310756	0.0239804	0.0227259	0.0162871	0.0159703		27.6	0.171685	0.172734	0.147893	0.150623	0.11888	0.120013	0.093355	0.09238
			27.8	0.448426	0.458885	0.405917	0.408395	0.210094	0.209582	0.142646	0.140246		27.8	0.0466273	0.0437351	0.0335987	0.0312176	0.0237977	0.0227861	0.0160788	0.0159999		27.8	0.172179	0.173183	0.147935	0.150985	0.118771	0.120299	0.093346	0.092602
			28	0.448343	0.459036	0.405973	0.409067	0.211008	0.210581	0.143099	0.141026		28	0.0469686	0.0439143	0.0337299	0.0313587	0.0239499	0.0228457	0.0164038	0.0160292		28	0.172529	0.173629	0.148003	0.151343	0.118782	0.120581	0.093066	0.092821
			28.2	0.448835	0.459184	0.406757	0.409728	0.212177	0.211575	0.143783	0.141803		28.2	0.046789	0.0440923	0.0334275	0.031499	0.0236211	0.0229048	0.0159778	0.0160583		28.2	0.172748	0.17407	0.148519	0.151698	0.118782	0.12086	0.092786	0.093039
			28.4	0.448885	0.459329	0.40738	0.410378	0.213189	0.212563	0.144165	0.142578		28.4	0.0467862	0.0442692	0.0331473	0.0316385	0.0233401	0.0229635	0.0154438	0.016087		28.4	0.173178	0.174508	0.149037	0.15205	0.11891	0.121136	0.09304	0.093256
			28.6	0.448869	0.459471	0.407583	0.411017	0.213705	0.213547	0.144144	0.14335		28.6	0.0466524	0.0444448	0.0329383	0.0317771	0.0237138	0.0230216	0.0154539	0.0161154		28.6	0.17355	0.174942	0.14948	0.152398	0.119033	0.121409	0.092723	0.093471
			28.8	0.448917	0.459611	0.408099	0.411646	0.21464	0.214525	0.144248	0.14412		28.8	0.0467704	0.0446194	0.0332866	0.0319149	0.0237071	0.0230792	0.0157274	0.0161435		28.8	0.174248	0.175373	0.150204	0.152744	0.119966	0.121679	0.09281	0.093684
			29	0.448942	0.459749	0.408609	0.412264	0.215786	0.215498	0.144852	0.144887		29	0.046752	0.0447927	0.0331015	0.0320519	0.0236206	0.0231364	0.0155192	0.0161712		29	0.174189	0.175799	0.150731	0.153086	0.120154	0.121946	0.093257	0.093896
			29.2	0.449157	0.459884	0.409273	0.412872	0.216798	0.216466	0.145746	0.145652		29.2	0.0471428	0.0449649	0.0336158	0.0321881	0.0239134	0.023193	0.0163741	0.0161987		29.2	0.174577	0.176222	0.15149	0.153425	0.120395	0.12221	0.09358	0.094106
			29.4	0.449433	0.460018	0.409483	0.41347	0.217664	0.217429	0.146325	0.146415		29.4	0.0471301	0.045136	0.0335583	0.0323234	0.023573	0.0232492	0.01633	0.0162259		29.4	0.17488	0.176642	0.152291	0.153761	0.12064	0.122471	0.093574	0.094315
			29.6	0.449914	0.460149	0.409683	0.414059	0.218476	0.218387	0.146864	0.147175		29.6	0.0473664	0.045306	0.0341193	0.032458	0.0236494	0.0233049	0.0162104	0.0162529		29.6	0.175886	0.177058	0.153096	0.154093	0.121273	0.122729	0.094689	0.094522
			29.8	0.450187	0.460278	0.409519	0.414637	0.219015	0.21934	0.147386	0.147933		29.8	0.0473831	0.0454749	0.0343312	0.0325918	0.0234213	0.0233602	0.0161847	0.0162795		29.8	0.176233	0.17747	0.153256	0.154423	0.120927	0.122984	0.09491	0.094728
			30	0.450466	0.460405	0.410193	0.415207	0.220035	0.220289	0.148461	0.148688		30	0.0472545	0.0456426	0.0343837	0.0327247	0.0236621	0.0234149	0.0165183	0.0163058		30	0.176857	0.177879	0.153695	0.15475	0.121092	0.123237	0.095588	0.094932
			30.2	0.450507	0.46053	0.410288	0.415766	0.220518	0.221232	0.1493	0.149441		30.2	0.0476623	0.0458093	0.0347673	0.0328569	0.0240484	0.0234692	0.0169345	0.0163319		30.2	0.177093	0.178285	0.153564	0.155074	0.121201	0.123486	0.095592	0.095135
			30.4	0.450752	0.460654	0.410577	0.416317	0.221314	0.22217	0.150679	0.150192		30.4	0.0472583	0.0459748	0.0345996	0.0329883	0.023963	0.0235231	0.0169981	0.0163577		30.4	0.177723	0.178687	0.153901	0.155394	0.121776	0.123733	0.09599	0.095337
			30.6	0.451364	0.460776	0.411144	0.416859	0.222171	0.223103	0.151913	0.15094		30.6	0.0471459	0.0461393	0.0346129	0.0331189	0.0233222	0.0235765	0.0168918	0.0163832		30.6	0.178067	0.179085	0.154666	0.155712	0.122729	0.123978	0.096829	0.095537
			30.8	0.451467	0.460896	0.411363	0.417392	0.223116	0.224032	0.15294	0.151686		30.8	0.0471285	0.0463027	0.0345345	0.0332488	0.0231624	0.0236295	0.0163962	0.0164085		30.8	0.178616	0.179481	0.154974	0.156027	0.12301	0.124219	0.096813	0.095735
			31	0.451514	0.461014	0.411893	0.417916	0.224082	0.224956	0.153929	0.15243		31	0.0473691	0.0464651	0.034814	0.0333779	0.0232484	0.023682	0.0161889	0.0164335		31	0.179426	0.179873	0.155446	0.156339	0.123697	0.124458	0.097535	0.095932
			31.2	0.451389	0.461131	0.412279	0.418432	0.224886	0.225875	0.154513	0.153171		31.2	0.0480127	0.0466264	0.0353142	0.0335062	0.0235421	0.0237341	0.016717	0.0164583		31.2	0.179339	0.180261	0.155155	0.156649	0.123505	0.124695	0.097486	0.096128
			31.4	0.451189	0.461247	0.412105	0.41894	0.22543	0.226789	0.154838	0.15391		31.4	0.0483009	0.0467866	0.0354783	0.0336338	0.0234855	0.0237857	0.0162147	0.0164828		31.4	0.179186	0.180647	0.155186	0.156955	0.123016	0.124928	0.096928	0.096322
			31.6	0.451485	0.46136	0.412469	0.419439	0.22624	0.227698	0.15528	0.154646		31.6	0.0486174	0.0469458	0.0351863	0.0337606	0.0231542	0.0238369	0.015872	0.016507		31.6	0.179483	0.181029	0.155453	0.157259	0.122803	0.12516	0.096493	0.096515
			31.8	0.451651	0.461473	0.41323	0.41993	0.227082	0.228603	0.156012	0.15538		31.8	0.0488039	0.047104	0.035152	0.0338867	0.0230431	0.0238878	0.0154541	0.016531		31.8	0.179342	0.181408	0.155381	0.15756	0.122627	0.125388	0.096373	0.096707
			32	0.451672	0.461584	0.413683	0.420413	0.227892	0.229503	0.155866	0.156112		32	0.04858	0.0472611	0.0349933	0.034012	0.0227689	0.0239381	0.0152455	0.0165547		32	0.179265	0.181784	0.155161	0.157858	0.122526	0.125615	0.09605	0.096897
			32.2	0.452082	0.461694	0.414188	0.420889	0.229072	0.230398	0.156202	0.156841		32.2	0.0481047	0.0474173	0.0345845	0.0341367	0.0227176	0.0239881	0.014336	0.0165782		32.2	0.179068	0.182157	0.154653	0.158154	0.122048	0.125839	0.095644	0.097086
			32.4	0.452322	0.461803	0.415054	0.421357	0.230178	0.231289	0.156138	0.157569		32.4	0.0479913	0.0475724	0.0343509	0.0342605	0.0229819	0.0240377	0.0144936	0.0166015		32.4	0.179244	0.182526	0.154659	0.158447	0.121796	0.12606	0.095572	0.097273
			32.6	0.452644	0.461911	0.416029	0.421817	0.231241	0.232175	0.1565	0.158293		32.6	0.0479315	0.0477265	0.0344564	0.0343837	0.0234473	0.0240868	0.0145753	0.0166245		32.6	0.178947	0.182893	0.154602	0.158737	0.121577	0.126279	0.09511	0.09746
			32.8	0.452772	0.462017	0.416812	0.422271	0.232483	0.233057	0.156747	0.159016		32.8	0.047881	0.0478797	0.0346495	0.0345061	0.0234166	0.0241356	0.0144345	0.0166473		32.8	0.179023	0.183256	0.154818	0.159025	0.121865	0.126496	0.095378	0.097645
			33	0.452873	0.462122	0.417285	0.422716	0.233337	0.233933	0.157328	0.159736		33	0.0482615	0.0480318	0.0351261	0.0346279	0.0239312	0.024184	0.0147795	0.0166699		33	0.179224	0.183617	0.154946	0.15931	0.121926	0.12671	0.095688	0.097828
			33.2	0.45306	0.462226	0.417503	0.423155	0.234472	0.234806	0.157998	0.160454		33.2	0.048728	0.048183	0.0357845	0.0347489	0.0244421	0.0242319	0.015443	0.0166922		33.2	0.179345	0.183974	0.154979	0.159593	0.12169	0.126922	0.095703	0.09801
			33.4	0.453307	0.46233	0.417631	0.423587	0.235268	0.235674	0.158544	0.16117		33.4	0.0489479	0.0483332	0.036028	0.0348692	0.024506	0.0242795	0.0152975	0.0167143		33.4	0.179594	0.184329	0.154599	0.159873	0.121662	0.127132	0.096101	0.098192
			33.6	0.453748	0.462432	0.418036	0.424012	0.236094	0.236537	0.15967	0.161884		33.6	0.049421	0.0484824	0.0372516	0.0349888	0.0249254	0.0243267	0.0159161	0.0167362		33.6	0.179983	0.184681	0.154092	0.160151	0.121328	0.12734	0.096561	0.098371
			33.8	0.453978	0.462533	0.418604	0.42443	0.237117	0.237396	0.160643	0.162595		33.8	0.0493431	0.0486307	0.037578	0.0351078	0.0251419	0.0243735	0.0166253	0.0167579		33.8	0.180138	0.185029	0.153809	0.160426	0.120766	0.127545	0.096622	0.09855
			34	0.454355	0.462633	0.419307	0.424842	0.238236	0.23825	0.161917	0.163304		34	0.0493469	0.048778	0.0379083	0.035226	0.0253245	0.02442	0.016832	0.0167794		34	0.18068	0.185375	0.154351	0.160699	0.121473	0.127748	0.097128	0.098727
			34.2	0.454316	0.462733	0.419234	0.425247	0.239152	0.2391	0.162801	0.164011		34.2	0.0493102	0.0489244	0.0381466	0.0353436	0.0251934	0.024466	0.0169962	0.0168006		34.2	0.181166	0.185718	0.154352	0.160969	0.121508	0.127949	0.097091	0.098903
			34.4	0.454568	0.462831	0.419259	0.425646	0.240116	0.239946	0.164016	0.164715		34.4	0.0490683	0.0490699	0.0380208	0.0354604	0.0250914	0.0245117	0.0172931	0.0168217		34.4	0.181871	0.186059	0.154818	0.161237	0.121741	0.128148	0.097729	0.099078
			34.6	0.454663	0.462929	0.419588	0.426038	0.24094	0.240787	0.164828	0.165418		34.6	0.0495053	0.0492144	0.038125	0.0355766	0.0250167	0.0245571	0.0176358	0.0168425		34.6	0.182152	0.186396	0.155293	0.161503	0.122378	0.128345	0.097964	0.099251
			34.8	0.454529	0.463026	0.419455	0.426425	0.241708	0.241624	0.165355	0.166118		34.8	0.0494834	0.049358	0.0380444	0.0356922	0.0251108	0.024602	0.0179366	0.0168631		34.8	0.182227	0.186731	0.155007	0.161766	0.122239	0.12854	0.097574	0.099424
			35	0.454245	0.463122	0.418903	0.426805	0.242151	0.242456	0.166037	0.166815		35	0.049565	0.0495007	0.0376488	0.035807	0.0251344	0.0246466	0.0179774	0.0168836		35	0.18283	0.187063	0.15551	0.162027	0.122602	0.128733	0.097947	0.099595
			35.2	0.453925	0.463218	0.418588	0.42718	0.242608	0.243284	0.166442	0.167511		35.2	0.0493919	0.0496425	0.0370476	0.0359213	0.0247038	0.0246909	0.0178871	0.0169038		35.2	0.182642	0.187392	0.155766	0.162286	0.122353	0.128923	0.097295	0.099765
			35.4	0.4542	0.463313	0.418636	0.427548	0.243534	0.244108	0.167576	0.168205		35.4	0.0487634	0.0497834	0.0365326	0.0360348	0.0236856	0.0247348	0.0167358	0.0169238		35.4	0.183365	0.187719	0.156282	0.162542	0.122888	0.129112	0.097668	0.099934
			35.6	0.454399	0.463407	0.418691	0.427911	0.244373	0.244928	0.167758	0.168896		35.6	0.0488888	0.0499234	0.0362454	0.0361477	0.0235787	0.0247784	0.0166361	0.0169437		35.6	0.183789	0.188043	0.156791	0.162796	0.123461	0.129299	0.09831	0.100101
			35.8	0.453977	0.4635	0.418609	0.428269	0.245173	0.245743	0.167902	0.169585		35.8	0.048735	0.0500625	0.0361479	0.03626	0.023508	0.0248216	0.0167216	0.0169634		35.8	0.184145	0.188364	0.156779	0.163048	0.123986	0.129484	0.098472	0.100268
			36	0.454227	0.463593	0.418479	0.428621	0.246036	0.246555	0.168162	0.170272		36	0.0488308	0.0502008	0.0359302	0.0363716	0.0234501	0.0248645	0.0167732	0.0169828		36	0.184877	0.188683	0.157246	0.163298	0.124478	0.129667	0.099276	0.100433
			36.2	0.454352	0.463685	0.418755	0.428967	0.247002	0.247362	0.168419	0.170957		36.2	0.0484325	0.0503381	0.0356202	0.0364826	0.0232945	0.024907	0.0162971	0.0170021		36.2	0.185076	0.188999	0.158019	0.163546	0.124896	0.129848	0.099636	0.100597
			36.4	0.45464	0.463777	0.419485	0.429308	0.247523	0.248164	0.168812	0.171639		36.4	0.0482848	0.0504746	0.035355	0.0365929	0.0227616	0.0249493	0.0162155	0.0170212		36.4	0.185977	0.189313	0.159212	0.163791	0.125888	0.130027	0.100642	0.10076
			36.6	0.454746	0.463868	0.419969	0.429644	0.24814	0.248963	0.169546	0.17232		36.6	0.0485967	0.0506103	0.0354168	0.0367026	0.0229696	0.0249911	0.0161467	0.0170401		36.6	0.185878	0.189624	0.159633	0.164035	0.126453	0.130204	0.100902	0.100922
			36.8	0.454704	0.463958	0.419835	0.429975	0.248622	0.249758	0.169887	0.172998		36.8	0.0487952	0.0507451	0.0354904	0.0368117	0.0227332	0.0250327	0.0157934	0.0170589		36.8	0.186114	0.189932	0.160594	0.164276	0.127328	0.13038	0.101473	0.101083
			37	0.454917	0.464048	0.419801	0.4303	0.24909	0.250548	0.170568	0.173674		37	0.0495035	0.050879	0.0357227	0.0369202	0.023188	0.025074	0.0158714	0.0170775		37	0.1862	0.190238	0.161146	0.164515	0.127804	0.130553	0.101616	0.101243
			37.2	0.455287	0.464137	0.420038	0.430621	0.249878	0.251335	0.171435	0.174348		37.2	0.0502464	0.0510121	0.0356714	0.0370281	0.0233437	0.0251149	0.0158106	0.0170958		37.2	0.185984	0.190542	0.161021	0.164752	0.127748	0.130725	0.101336	0.101401
			37.4	0.455193	0.464226	0.420542	0.430937	0.250498	0.252117	0.172244	0.17502		37.4	0.0504769	0.0511444	0.036231	0.0371353	0.0235398	0.0251555	0.0156619	0.0171141		37.4	0.18672	0.190843	0.161561	0.164987	0.128032	0.130896	0.101147	0.101559
			37.6	0.455112	0.464315	0.420939	0.431248	0.251323	0.252895	0.173066	0.17569		37.6	0.0509696	0.0512759	0.0366942	0.037242	0.0235312	0.0251958	0.0162872	0.0171321		37.6	0.186893	0.191142	0.161447	0.16522	0.127929	0.131064	0.101289	0.101715
			37.8	0.454661	0.464403	0.421377	0.431555	0.251836	0.253669	0.173194	0.176357		37.8	0.0506242	0.0514065	0.036515	0.037348	0.0232978	0.0252358	0.0163059	0.01715		37.8	0.187522	0.191439	0.162133	0.165452	0.128009	0.131231	0.101793	0.10187
			38	0.454868	0.46449	0.422172	0.431857	0.252605	0.25444	0.174196	0.177023		38	0.0505143	0.0515363	0.0367703	0.0374534	0.0231818	0.0252755	0.0160028	0.0171678		38	0.187687	0.191733	0.162123	0.165681	0.128264	0.131396	0.10177	0.102024
			38.2	0.455107	0.464577	0.422515	0.432154	0.252981	0.255206	0.174869	0.177686		38.2	0.0511593	0.0516653	0.0369201	0.0375583	0.0237607	0.0253148	0.0166395	0.0171853		38.2	0.188101	0.192024	0.16211	0.165908	0.127878	0.131559	0.101971	0.102177
			38.4	0.455399	0.464664	0.422826	0.432447	0.253435	0.255968	0.175331	0.178348		38.4	0.0511829	0.0517935	0.0365703	0.0376625	0.0237222	0.0253539	0.0166974	0.0172027		38.4	0.188532	0.192314	0.162481	0.166133	0.127959	0.131721	0.10227	0.10233
			38.6	0.45568	0.46475	0.423063	0.432736	0.254198	0.256727	0.176287	0.179007		38.6	0.0510127	0.051921	0.03607	0.0377662	0.0233652	0.0253927	0.0166633	0.01722		38.6	0.188657	0.192601	0.162539	0.166356	0.128247	0.131881	0.101979	0.102481
			38.8	0.456113	0.464836	0.423341	0.43302	0.254621	0.257481	0.17728	0.179664		38.8	0.051306	0.0520476	0.0360957	0.0378693	0.0235107	0.0254312	0.0165505	0.0172371		38.8	0.188702	0.192886	0.162005	0.166578	0.127799	0.13204	0.101895	0.102631
			39	0.456025	0.464922	0.42382	0.4333	0.255398	0.258232	0.178123	0.180319		39	0.051702	0.0521734	0.0360874	0.0379718	0.0237178	0.0254694	0.0164373	0.017254		39	0.188908	0.193169	0.161883	0.166798	0.127831	0.132197	0.101996	0.102779
			39.2	0.456557	0.465007	0.424108	0.433576	0.256477	0.258978	0.17914	0.180972		39.2	0.0517712	0.0522985	0.0363938	0.0380738	0.0240482	0.0255073	0.0171043	0.0172708		39.2	0.189208	0.193449	0.162395	0.167015	0.128077	0.132352	0.10247	0.102927
			39.4	0.457055	0.465092	0.424642	0.433848	0.257374	0.259721	0.180177	0.181623		39.4	0.0521439	0.0524228	0.0365623	0.0381751	0.0242057	0.025545	0.0173734	0.0172874		39.4	0.189736	0.193727	0.162726	0.167231	0.127982	0.132506	0.103175	0.103074
			39.6	0.457411	0.465176	0.425373	0.434116	0.258321	0.26046	0.180744	0.182272		39.6	0.0528529	0.0525463	0.0372378	0.0382759	0.0250221	0.0255823	0.0181431	0.0173039		39.6	0.189828	0.194003	0.162756	0.167445	0.127765	0.132658	0.103071	0.10322
			39.8	0.457873	0.46526	0.426424	0.43438	0.259681	0.261196	0.181778	0.182919		39.8	0.0528603	0.0526691	0.0368352	0.0383762	0.0249751	0.0256194	0.0181658	0.0173203		39.8	0.190303	0.194277	0.16291	0.167658	0.128054	0.132809	0.103073	0.103365
			40	0.458529	0.465344	0.426864	0.43464	0.260624	0.261927	0.182316	0.183564		40	0.0529544	0.0527911	0.0365813	0.0384759	0.0251832	0.0256562	0.0181602	0.0173365		40	0.19033	0.194549	0.163492	0.167868	0.128206	0.132958	0.103553	0.103509
			40.2	0.458865	0.465428	0.427654	0.434896	0.261504	0.262655	0.182532	0.184207		40.2	0.0524282	0.0529124	0.0365878	0.038575	0.0250467	0.0256927	0.0177635	0.0173525		40.2	0.190142	0.194819	0.163973	0.168077	0.128783	0.133106	0.103372	0.103652
			40.4	0.459696	0.465511	0.428442	0.435149	0.262498	0.263379	0.183635	0.184847		40.4	0.0528859	0.0530329	0.0366802	0.0386736	0.0252844	0.025729	0.0178355	0.0173685		40.4	0.190533	0.195086	0.164187	0.168284	0.129054	0.133252	0.103533	0.103794
			40.6	0.460636	0.465594	0.428755	0.435398	0.263429	0.264099	0.184749	0.185486		40.6	0.0531125	0.0531527	0.0365733	0.0387716	0.0256576	0.025765	0.0174566	0.0173843		40.6	0.190363	0.195352	0.163938	0.168489	0.129021	0.133397	0.103076	0.103935
			40.8	0.461112	0.465677	0.428621	0.435643	0.26398	0.264816	0.18538	0.186123		40.8	0.0530273	0.0532718	0.0366492	0.0388691	0.0253036	0.0258007	0.0167551	0.0173999		40.8	0.190544	0.195615	0.16435	0.168693	0.129392	0.133541	0.103501	0.104075
			41	0.461431	0.465759	0.428664	0.435885	0.26481	0.265528	0.186073	0.186758		41	0.0529657	0.0533901	0.0365961	0.0389661	0.0255714	0.0258362	0.0165153	0.0174154		41	0.190489	0.195876	0.164474	0.168895	0.129343	0.133683	0.102985	0.104214
			41.2	0.461493	0.465841	0.428963	0.436124	0.265951	0.266238	0.186486	0.18739		41.2	0.0529525	0.0535077	0.0368021	0.0390625	0.0254715	0.0258714	0.0163999	0.0174308		41.2	0.191042	0.196136	0.164992	0.169095	0.12966	0.133824	0.102949	0.104352
			41.4	0.461447	0.465923	0.429519	0.436359	0.266897	0.266943	0.187065	0.188021		41.4	0.0527344	0.0536246	0.0370744	0.0391584	0.0254816	0.0259063	0.0165202	0.0174461		41.4	0.191695	0.196393	0.165577	0.169294	0.13	0.133963	0.103038	0.104489
			41.6	0.461295	0.466005	0.429582	0.436591	0.267417	0.267645	0.186888	0.18865		41.6	0.052295	0.0537408	0.0370528	0.0392538	0.025218	0.025941	0.0167988	0.0174612		41.6	0.191829	0.196649	0.165297	0.169491	0.130032	0.134101	0.103522	0.104625
			41.8	0.461325	0.466086	0.430138	0.436819	0.268086	0.268343	0.186997	0.189277		41.8	0.0519895	0.0538563	0.0375652	0.0393486	0.0254936	0.0259755	0.0167405	0.0174762		41.8	0.19187	0.196902	0.165185	0.169687	0.129974	0.134238	0.103541	0.10476
			42	0.461767	0.466168	0.430161	0.437044	0.268831	0.269038	0.187796	0.189901		42	0.0523481	0.0539711	0.0380946	0.0394429	0.0255631	0.0260097	0.0168885	0.017491		42	0.191773	0.197153	0.164917	0.16988	0.129675	0.134374	0.103083	0.104894
			42.2	0.461817	0.466249	0.430096	0.437267	0.269422	0.269729	0.188138	0.190524		42.2	0.0522529	0.0540852	0.0381083	0.0395367	0.0258997	0.0260437	0.0169289	0.0175058		42.2	0.192144	0.197403	0.165508	0.170073	0.129845	0.134508	0.103716	0.105028
			42.4	0.461776	0.46633	0.430389	0.437486	0.270378	0.270417	0.18884	0.191145		42.4	0.0522178	0.0541986	0.0384854	0.03963	0.0255394	0.0260774	0.0169846	0.0175204		42.4	0.19219	0.197651	0.166039	0.170263	0.130178	0.134641	0.103811	0.10516
			42.6	0.461923	0.46641	0.430391	0.437702	0.271164	0.271101	0.189668	0.191764		42.6	0.0527174	0.0543113	0.0389643	0.0397228	0.0254641	0.0261109	0.0173229	0.0175349		42.6	0.192025	0.197897	0.16609	0.170453	0.129967	0.134772	0.103738	0.105292
			42.8	0.461366	0.46649	0.430283	0.437915	0.271204	0.271781	0.189717	0.192381		42.8	0.0533124	0.0544234	0.0393583	0.0398151	0.0257706	0.0261441	0.0174055	0.0175493		42.8	0.191922	0.19814	0.166354	0.17064	0.130058	0.134903	0.104681	0.105422
			43	0.461005	0.466571	0.430425	0.438125	0.271889	0.272459	0.189964	0.192996		43	0.0533939	0.0545348	0.0397659	0.0399069	0.0259577	0.0261771	0.0180514	0.0175636		43	0.19193	0.198383	0.166541	0.170826	0.129923	0.135032	0.105187	0.105552
			43.2	0.461244	0.466651	0.430378	0.438332	0.272689	0.273132	0.190524	0.193609		43.2	0.0533472	0.0546455	0.0396848	0.0399982	0.025877	0.0262099	0.0187313	0.0175777		43.2	0.19239	0.198623	0.167249	0.171011	0.129852	0.13516	0.105747	0.105681
			43.4	0.461219	0.466731	0.431127	0.438536	0.273651	0.273802	0.191099	0.19422		43.4	0.0542537	0.0547555	0.0397956	0.0400889	0.0257704	0.0262424	0.0192211	0.0175918		43.4	0.192715	0.198861	0.168036	0.171194	0.130045	0.135286	0.105843	0.105809
			43.6	0.461415	0.46681	0.431368	0.438738	0.274424	0.274469	0.19185	0.19483		43.6	0.0546148	0.0548649	0.0400498	0.0401792	0.0259346	0.0262747	0.0194855	0.0176057		43.6	0.193198	0.199098	0.167784	0.171376	0.130688	0.135412	0.106091	0.105936
			43.8	0.461511	0.46689	0.431544	0.438937	0.275114	0.275132	0.192408	0.195437		43.8	0.0548322	0.0549737	0.0394809	0.040269	0.0252331	0.0263068	0.019214	0.0176195		43.8	0.193143	0.199333	0.167807	0.171556	0.130708	0.135536	0.106228	0.106062
			44	0.461832	0.466969	0.431671	0.439133	0.275629	0.275792	0.193007	0.196042		44	0.0550635	0.0550818	0.0394308	0.0403584	0.0254103	0.0263387	0.0192815	0.0176332		44	0.193298	0.199566	0.168135	0.171735	0.131024	0.135659	0.106962	0.106187
			44.2	0.462338	0.467048	0.432147	0.439327	0.276559	0.276449	0.194107	0.196646		44.2	0.055403	0.0551892	0.0395639	0.0404472	0.0252527	0.0263704	0.0188213	0.0176468		44.2	0.193337	0.199797	0.167873	0.171912	0.131126	0.135782	0.107111	0.106312
			44.4	0.463166	0.467127	0.432776	0.439518	0.27691	0.277102	0.195212	0.197248		44.4	0.0558415	0.0552961	0.0393301	0.0405356	0.025122	0.0264018	0.0185264	0.0176603		44.4	0.19378	0.200027	0.167433	0.172088	0.131279	0.135902	0.107356	0.106435
			44.6	0.463464	0.467206	0.432432	0.439706	0.276986	0.277752	0.195884	0.197847		44.6	0.0559034	0.0554022	0.0391427	0.0406235	0.0251263	0.026433	0.0186733	0.0176737		44.6	0.193825	0.200255	0.167135	0.172263	0.131116	0.136022	0.10749	0.106558
			44.8	0.463578	0.467285	0.432317	0.439892	0.277338	0.278398	0.196534	0.198445		44.8	0.0558167	0.0555078	0.0390398	0.0407109	0.0248244	0.026464	0.0187428	0.017687		44.8	0.194215	0.200481	0.167558	0.172436	0.131078	0.136141	0.107855	0.10668
			45	0.463231	0.467363	0.432322	0.440076	0.27794	0.279041	0.196955	0.199041		45	0.0554307	0.0556127	0.0389208	0.0407978	0.0245219	0.0264948	0.0183474	0.0177002		45	0.194356	0.200706	0.167889	0.172608	0.131223	0.136259	0.107871	0.106801
			45.2	0.463115	0.467442	0.432597	0.440257	0.27869	0.279681	0.197322	0.199635		45.2	0.0554986	0.0557171	0.0387692	0.0408843	0.0246555	0.0265254	0.0180975	0.0177132		45.2	0.194614	0.200929	0.168324	0.172778	0.131244	0.136375	0.108149	0.106921
			45.4	0.463363	0.46752	0.433106	0.440436	0.279147	0.280318	0.198	0.200227		45.4	0.0551016	0.0558208	0.0385609	0.0409703	0.0245178	0.0265557	0.0178045	0.0177262		45.4	0.195274	0.20115	0.168139	0.172947	0.131565	0.136491	0.108131	0.107041
			45.6	0.463297	0.467598	0.433026	0.440612	0.279308	0.280951	0.197978	0.200818		45.6	0.0546346	0.0559239	0.0384515	0.0410559	0.0248994	0.0265859	0.0174653	0.0177391		45.6	0.195372	0.201369	0.168183	0.173115	0.131831	0.136605	0.107796	0.107159
			45.8	0.464009	0.467676	0.433688	0.440786	0.280248	0.281582	0.198516	0.201406		45.8	0.0548324	0.0560264	0.0388268	0.041141	0.0254779	0.0266159	0.0172038	0.0177519		45.8	0.195368	0.201588	0.168	0.173282	0.131739	0.136719	0.106947	0.107277
			46	0.464393	0.467754	0.43394	0.440958	0.280997	0.282208	0.199458	0.201993		46	0.0548504	0.0561283	0.039352	0.0412257	0.0257652	0.0266456	0.0172584	0.0177646		46	0.196098	0.201804	0.168426	0.173447	0.132037	0.136831	0.10709	0.107394
			46.2	0.464337	0.467832	0.434521	0.441128	0.281799	0.282832	0.199888	0.202578		46.2	0.0544163	0.0562296	0.0394736	0.0413099	0.0258057	0.0266752	0.016819	0.0177772		46.2	0.196036	0.202019	0.168783	0.173611	0.132239	0.136943	0.107264	0.10751
			46.4	0.463962	0.46791	0.434805	0.441295	0.282268	0.283453	0.200236	0.203161		46.4	0.0548236	0.0563303	0.0404106	0.0413936	0.0261047	0.0267046	0.0170609	0.0177897		46.4	0.195935	0.202232	0.168938	0.173774	0.13215	0.137053	0.10653	0.107626
			46.6	0.46386	0.467987	0.435056	0.441461	0.282814	0.28407	0.200691	0.203742		46.6	0.0548252	0.0564304	0.0407259	0.0414769	0.0261243	0.0267337	0.0171164	0.0178021		46.6	0.195939	0.202444	0.168724	0.173935	0.13198	0.137163	0.106029	0.10774
			46.8	0.463842	0.468065	0.435324	0.441624	0.283518	0.284684	0.201292	0.204321		46.8	0.0550723	0.05653	0.0409208	0.0415598	0.0264951	0.0267627	0.0171012	0.0178144		46.8	0.195907	0.202654	0.168823	0.174095	0.132151	0.137271	0.105962	0.107854
			47	0.464095	0.468142	0.435495	0.441785	0.284577	0.285295	0.202017	0.204899		47	0.0549763	0.0566289	0.0412049	0.0416423	0.026617	0.0267915	0.0176929	0.0178266		47	0.196131	0.202863	0.169196	0.174254	0.132227	0.137379	0.105617	0.107967
			47.2	0.463955	0.468219	0.435251	0.441944	0.285143	0.285903	0.20247	0.205474		47.2	0.0548137	0.0567273	0.0413564	0.0417243	0.0267017	0.0268201	0.0178642	0.0178388		47.2	0.196568	0.20307	0.169593	0.174412	0.13292	0.137485	0.105819	0.10808
			47.4	0.464144	0.468296	0.435459	0.442102	0.286043	0.286508	0.203082	0.206048		47.4	0.0555283	0.0568252	0.0418613	0.0418059	0.0273175	0.0268485	0.0185364	0.0178508		47.4	0.196684	0.203276	0.169915	0.174569	0.133601	0.137591	0.105531	0.108191
			47.6	0.464192	0.468373	0.435478	0.442257	0.287034	0.28711	0.203812	0.20662		47.6	0.0555764	0.0569224	0.042396	0.041887	0.0277035	0.0268768	0.0190505	0.0178628		47.6	0.196657	0.20348	0.169153	0.174724	0.133605	0.137696	0.10548	0.108302
			47.8	0.464467	0.46845	0.435963	0.442411	0.287675	0.287709	0.204717	0.207191		47.8	0.0558777	0.0570191	0.0424063	0.0419678	0.0274781	0.0269048	0.019041	0.0178747		47.8	0.196484	0.203683	0.168739	0.174878	0.133581	0.137799	0.105394	0.108412
			48	0.465106	0.468527	0.436314	0.442562	0.288753	0.288304	0.205482	0.207759		48	0.0559326	0.0571153	0.0425493	0.0420481	0.0278315	0.0269327	0.0193801	0.0178865		48	0.197026	0.203884	0.168883	0.175031	0.134372	0.137902	0.105921	0.108521
			48.2	0.46531	0.468604	0.436451	0.442712	0.289406	0.288897	0.206298	0.208326		48.2	0.0563346	0.0572109	0.0429322	0.042128	0.0277929	0.0269604	0.0198948	0.0178982		48.2	0.196957	0.204084	0.168613	0.175183	0.13403	0.138004	0.105703	0.108629
			48.4	0.465824	0.46868	0.436748	0.44286	0.289862	0.289487	0.206475	0.208891		48.4	0.0560015	0.057306	0.042516	0.0422074	0.0273452	0.0269879	0.0198813	0.0179098		48.4	0.1977	0.204282	0.168925	0.175334	0.134545	0.138105	0.105985	0.108737
			48.6	0.466049	0.468757	0.436581	0.443006	0.290479	0.290073	0.207253	0.209454		48.6	0.0558188	0.0574005	0.0425819	0.0422865	0.027005	0.0270152	0.0203986	0.0179214		48.6	0.198259	0.204479	0.169611	0.175484	0.134778	0.138206	0.106592	0.108844
			48.8	0.466114	0.468834	0.436273	0.44315	0.290898	0.290657	0.207835	0.210015		48.8	0.0554182	0.0574945	0.0419269	0.0423651	0.026317	0.0270424	0.0200457	0.0179328		48.8	0.199298	0.204675	0.170033	0.175632	0.135053	0.138305	0.107373	0.10895
			49	0.465628	0.46891	0.435992	0.443293	0.291107	0.291238	0.208131	0.210575		49	0.0551706	0.0575879	0.0416144	0.0424434	0.0257862	0.0270693	0.0194971	0.0179442		49	0.199334	0.204869	0.169914	0.17578	0.135055	0.138404	0.107647	0.109056
			49.2	0.465719	0.468986	0.436198	0.443434	0.29202	0.291815	0.209129	0.211133		49.2	0.0556016	0.0576808	0.0415989	0.0425212	0.0260535	0.0270962	0.0193004	0.0179555		49.2	0.199806	0.205062	0.169956	0.175926	0.134983	0.138502	0.108037	0.109161
			49.4	0.466119	0.469062	0.436719	0.443573	0.292239	0.29239	0.209814	0.211689		49.4	0.0559308	0.0577732	0.0416891	0.0425987	0.0255368	0.0271228	0.0188918	0.0179668		49.4	0.200221	0.205254	0.169861	0.176071	0.135354	0.138598	0.108307	0.109265
			49.6	0.466095	0.469139	0.436995	0.443711	0.292932	0.292962	0.21067	0.212243		49.6	0.0564261	0.0578651	0.0416912	0.0426757	0.0258236	0.0271493	0.0189011	0.0179779		49.6	0.200468	0.205444	0.170395	0.176216	0.135794	0.138695	0.108673	0.109368
			49.8	0.466532	0.469215	0.437724	0.443847	0.293847	0.293531	0.211468	0.212796		49.8	0.0571659	0.0579564	0.0422628	0.0427524	0.0259646	0.0271756	0.0190182	0.017989		49.8	0.200525	0.205633	0.170298	0.176359	0.135273	0.13879	0.108482	0.109471
			50	0.466399	0.469291	0.437973	0.443982	0.294268	0.294097	0.212341	0.213347		50	0.0574275	0.0580472	0.0425926	0.0428286	0.0262741	0.0272018	0.0189561	0.018		50	0.201245	0.20582	0.171151	0.176501	0.135634	0.138884	0.109237	0.109573
			50.2	0.465987	0.469366	0.438222	0.444115	0.294641	0.29466	0.212808	0.213896		50.2	0.0576969	0.0581375	0.0428918	0.0429045	0.0258692	0.0272278	0.0183381	0.018011		50.2	0.200724	0.206006	0.170989	0.176642	0.135117	0.138978	0.108641	0.109674
			50.4	0.465879	0.469442	0.438548	0.444247	0.295586	0.29522	0.213533	0.214444		50.4	0.0581137	0.0582274	0.0433472	0.04298	0.0262552	0.0272536	0.0180226	0.0180219		50.4	0.201293	0.206191	0.171663	0.176782	0.135456	0.139071	0.10839	0.109774
			50.6	0.466133	0.469518	0.43839	0.444377	0.296547	0.295778	0.214565	0.214989		50.6	0.0581864	0.0583167	0.0433768	0.0430551	0.0266007	0.0272793	0.0177185	0.0180327		50.6	0.201312	0.206375	0.171849	0.176921	0.13571	0.139163	0.108305	0.109874
			50.8	0.466529	0.469594	0.438186	0.444505	0.297294	0.296333	0.215347	0.215533		50.8	0.0579913	0.0584055	0.0432049	0.0431298	0.0267361	0.0273048	0.0174974	0.0180434		50.8	0.201748	0.206557	0.172576	0.177059	0.136149	0.139255	0.108477	0.109973
			51	0.466326	0.469669	0.437856	0.444632	0.297712	0.296884	0.215439	0.216076		51	0.0578865	0.0584938	0.0431969	0.0432041	0.0270836	0.0273302	0.0175019	0.0180541		51	0.202103	0.206739	0.173385	0.177196	0.13632	0.139345	0.109076	0.110072
			51.2	0.466192	0.469745	0.437824	0.444758	0.29818	0.297433	0.215635	0.216616		51.2	0.0573723	0.0585816	0.0432043	0.0432781	0.0275214	0.0273554	0.0170264	0.0180647		51.2	0.202341	0.206919	0.173344	0.177332	0.136205	0.139435	0.109385	0.11017
			51.4	0.466427	0.46982	0.437919	0.444883	0.299142	0.29798	0.215899	0.217155		51.4	0.0575561	0.058669	0.0432218	0.0433516	0.0281348	0.0273805	0.0174523	0.0180752		51.4	0.202673	0.207097	0.174074	0.177467	0.136533	0.139525	0.109176	0.110267
			51.6	0.466357	0.469896	0.437928	0.445006	0.299468	0.298523	0.215932	0.217693		51.6	0.0570338	0.0587558	0.0436174	0.0434249	0.0283283	0.0274054	0.0175672	0.0180857		51.6	0.203178	0.207275	0.173786	0.177601	0.136467	0.139613	0.109511	0.110363
			51.8	0.466866	0.469971	0.438526	0.445127	0.300121	0.299064	0.216669	0.218228		51.8	0.056146	0.0588422	0.0428495	0.0434977	0.0277485	0.0274301	0.0170954	0.0180961		51.8	0.203308	0.207451	0.174039	0.177734	0.13666	0.139701	0.109811	0.110459
			52	0.467183	0.470046	0.438607	0.445248	0.301017	0.299602	0.216778	0.218762		52	0.0558617	0.0589281	0.0428758	0.0435702	0.0279558	0.0274548	0.0173549	0.0181064		52	0.203312	0.207626	0.173952	0.177866	0.137055	0.139788	0.110142	0.110554
			52.2	0.467234	0.470122	0.438612	0.445367	0.301363	0.300137	0.217376	0.219294		52.2	0.0556924	0.0590135	0.0428667	0.0436423	0.0278267	0.0274792	0.0173166	0.0181167		52.2	0.203752	0.2078	0.174457	0.177998	0.137262	0.139874	0.109987	0.110649
			52.4	0.46769	0.470197	0.438983	0.445485	0.302382	0.30067	0.21753	0.219825		52.4	0.0551758	0.0590985	0.0423879	0.043714	0.0273266	0.0275036	0.0167837	0.0181269		52.4	0.204542	0.207973	0.17526	0.178128	0.138185	0.13996	0.11053	0.110743
			52.6	0.467642	0.470272	0.438795	0.445601	0.302387	0.3012	0.218285	0.220354		52.6	0.0550248	0.059183	0.0423672	0.0437854	0.0274037	0.0275278	0.0171182	0.018137		52.6	0.204715	0.208144	0.175245	0.178257	0.138015	0.140045	0.110965	0.110836
			52.8	0.467711	0.470347	0.438387	0.445717	0.302928	0.301727	0.21866	0.220881		52.8	0.0552338	0.059267	0.0425314	0.0438565	0.0273847	0.0275518	0.0170081	0.0181471		52.8	0.204912	0.208315	0.175294	0.178386	0.138004	0.14013	0.11071	0.110929
			53	0.467669	0.470422	0.438414	0.445831	0.303494	0.302251	0.219465	0.221407		53	0.0555558	0.0593506	0.0430188	0.0439271	0.0273765	0.0275757	0.0170957	0.0181571		53	0.204338	0.208484	0.175172	0.178514	0.138072	0.140213	0.110926	0.111021
			53.2	0.467907	0.470497	0.438626	0.445944	0.304078	0.302773	0.220423	0.22193		53.2	0.0562793	0.0594337	0.0434622	0.0439975	0.027346	0.0275995	0.0174071	0.0181671		53.2	0.204587	0.208652	0.175772	0.17864	0.138265	0.140296	0.110957	0.111112
			53.4	0.468427	0.470572	0.439088	0.446056	0.304321	0.303293	0.220741	0.222453		53.4	0.0566332	0.0595163	0.0431217	0.0440675	0.0266008	0.0276231	0.0175705	0.018177		53.4	0.204283	0.208819	0.17555	0.178766	0.13826	0.140379	0.111121	0.111203
			53.6	0.468966	0.470646	0.439358	0.446166	0.305249	0.303809	0.221801	0.222973		53.6	0.0568854	0.0595985	0.042895	0.0441371	0.0266229	0.0276466	0.0178427	0.0181869		53.6	0.204264	0.208985	0.175682	0.178891	0.138576	0.140461	0.110937	0.111293
			53.8	0.469238	0.470721	0.439593	0.446276	0.305499	0.304323	0.222138	0.223493		53.8	0.0570715	0.0596803	0.0427276	0.0442064	0.0267122	0.02767	0.0177179	0.0181967		53.8	0.204171	0.20915	0.175159	0.179015	0.137802	0.140542	0.110253	0.111382
			54	0.469411	0.470796	0.439548	0.446384	0.306028	0.304835	0.222573	0.22401		54	0.0569168	0.0597616	0.0425744	0.0442753	0.02681	0.0276932	0.0178327	0.0182064		54	0.204856	0.209314	0.175483	0.179139	0.13817	0.140622	0.110515	0.111471
			54.2	0.469387	0.470871	0.439411	0.446492	0.306488	0.305344	0.223011	0.224526		54.2	0.0575101	0.0598425	0.0430962	0.0443439	0.0270838	0.0277163	0.0179515	0.0182161		54.2	0.204512	0.209476	0.175148	0.179261	0.137898	0.140702	0.110436	0.111559
			54.4	0.469335	0.470945	0.439368	0.446598	0.30725	0.30585	0.223434	0.22504		54.4	0.0578757	0.059923	0.0429045	0.0444122	0.0275293	0.0277393	0.0180723	0.0182257		54.4	0.204961	0.209638	0.175681	0.179383	0.138588	0.140781	0.110907	0.111647
			54.6	0.46951	0.47102	0.439536	0.446704	0.307527	0.306354	0.22372	0.225553		54.6	0.0578742	0.060003	0.0425257	0.0444802	0.027491	0.0277621	0.0180439	0.0182353		54.6	0.204825	0.209799	0.175396	0.179503	0.138708	0.14086	0.110707	0.111734
			54.8	0.469719	0.471094	0.439991	0.446808	0.308161	0.306855	0.224158	0.226063		54.8	0.0576275	0.0600826	0.0423801	0.0445478	0.0269601	0.0277848	0.0175609	0.0182448		54.8	0.205442	0.209958	0.175796	0.179623	0.138678	0.140938	0.111144	0.11182
			55	0.469705	0.471169	0.440187	0.446911	0.308553	0.307353	0.224156	0.226573		55	0.057939	0.0601618	0.0426082	0.044615	0.0271014	0.0278074	0.0176229	0.0182543		55	0.205187	0.210117	0.175702	0.179743	0.138488	0.141016	0.111284	0.111906
			55.2	0.46994	0.471243	0.440685	0.447014	0.309415	0.30785	0.224893	0.227081		55.2	0.0575596	0.0602405	0.0425753	0.044682	0.0267707	0.0278299	0.0179252	0.0182637		55.2	0.20543	0.210274	0.175612	0.179861	0.138417	0.141093	0.111339	0.111991
			55.4	0.469952	0.471317	0.440864	0.447115	0.309967	0.308343	0.225384	0.227587		55.4	0.0577265	0.0603188	0.0429561	0.0447486	0.0270524	0.0278522	0.018613	0.0182731		55.4	0.205777	0.21043	0.175907	0.179979	0.1389	0.141169	0.11111	0.112076
			55.6	0.470164	0.471392	0.441386	0.447215	0.310431	0.308834	0.225749	0.228091		55.6	0.0574125	0.0603967	0.0431822	0.0448149	0.0271925	0.0278745	0.0186776	0.0182824		55.6	0.205848	0.210586	0.175157	0.180095	0.13892	0.141245	0.11107	0.11216
			55.8	0.470441	0.471466	0.442376	0.447315	0.311277	0.309323	0.226144	0.228595		55.8	0.0572405	0.0604742	0.0427952	0.0448809	0.0264991	0.0278966	0.0185053	0.0182917		55.8	0.2054	0.21074	0.175194	0.180211	0.138702	0.14132	0.110765	0.112244
			56	0.470486	0.47154	0.442226	0.447413	0.311776	0.309809	0.226455	0.229096		56	0.0579452	0.0605513	0.0431544	0.0449466	0.0268432	0.0279185	0.0185135	0.0183009		56	0.205528	0.210894	0.174745	0.180327	0.139153	0.141395	0.110988	0.112327
			56.2	0.470832	0.471614	0.442728	0.447511	0.312603	0.310293	0.227389	0.229596		56.2	0.0582195	0.060628	0.0431432	0.0450119	0.0268128	0.0279404	0.0182704	0.0183101		56.2	0.205923	0.211046	0.174892	0.180441	0.139222	0.141469	0.110731	0.112409
			56.4	0.470997	0.471688	0.442987	0.447608	0.313318	0.310774	0.227612	0.230094		56.4	0.0586024	0.0607043	0.0431339	0.0450769	0.0270301	0.0279622	0.0180684	0.0183192		56.4	0.205804	0.211198	0.175258	0.180555	0.139141	0.141543	0.111133	0.112491
			56.6	0.470903	0.471762	0.442288	0.447704	0.313097	0.311253	0.227692	0.230591		56.6	0.0584395	0.0607802	0.0432869	0.0451417	0.0269594	0.0279838	0.0181073	0.0183283		56.6	0.205747	0.211348	0.175216	0.180668	0.13883	0.141616	0.111017	0.112572
			56.8	0.471369	0.471836	0.442494	0.447799	0.313842	0.31173	0.228095	0.231086		56.8	0.058701	0.0608557	0.0435801	0.0452061	0.0269703	0.0280053	0.0179464	0.0183373		56.8	0.20583	0.211498	0.175628	0.18078	0.139082	0.141689	0.110532	0.112653
			57	0.471471	0.47191	0.442467	0.447893	0.314062	0.312204	0.22878	0.23158		57	0.0582589	0.0609307	0.0435565	0.0452702	0.0267786	0.0280267	0.0180459	0.0183463		57	0.205692	0.211647	0.175253	0.180892	0.139005	0.141761	0.110518	0.112733
			57.2	0.471549	0.471984	0.442566	0.447987	0.314178	0.312676	0.229158	0.232072		57.2	0.05816	0.0610054	0.0430486	0.045334	0.0264049	0.028048	0.0177711	0.0183552		57.2	0.205607	0.211794	0.175188	0.181003	0.138656	0.141832	0.110445	0.112812
			57.4	0.472158	0.472058	0.442839	0.448079	0.314955	0.313145	0.22978	0.232563		57.4	0.0580033	0.0610798	0.042655	0.0453975	0.0262457	0.0280692	0.017436	0.0183641		57.4	0.205216	0.211941	0.174373	0.181113	0.138753	0.141903	0.110433	0.112891
			57.6	0.472329	0.472132	0.442806	0.448171	0.315648	0.313612	0.2302	0.233052		57.6	0.0582429	0.0611537	0.0428611	0.0454606	0.0265733	0.0280903	0.0174937	0.0183729		57.6	0.205048	0.212087	0.174258	0.181222	0.138863	0.141974	0.110073	0.11297
			57.8	0.471793	0.472205	0.442526	0.448262	0.315634	0.314077	0.2304	0.233539		57.8	0.0583783	0.0612272	0.0428107	0.0455235	0.026867	0.0281112	0.0174345	0.0183817		57.8	0.205542	0.212232	0.174553	0.181331	0.138632	0.142044	0.110267	0.113048
			58	0.472001	0.472279	0.442349	0.448352	0.315808	0.314539	0.230479	0.234025		58	0.0590901	0.0613004	0.0439315	0.0455861	0.0274896	0.0281321	0.0181278	0.0183905		58	0.205663	0.212376	0.174884	0.181439	0.138742	0.142114	0.110854	0.113125
			58.2	0.471935	0.472353	0.442345	0.448442	0.315914	0.314999	0.231008	0.23451		58.2	0.059489	0.0613732	0.0445174	0.0456484	0.0278897	0.0281528	0.0181637	0.0183992		58.2	0.205271	0.212519	0.174936	0.181546	0.138548	0.142183	0.110693	0.113202
			58.4	0.472028	0.472426	0.442779	0.44853	0.31636	0.315457	0.231616	0.234993		58.4	0.0594907	0.0614456	0.0445705	0.0457104	0.0277373	0.0281735	0.0178415	0.0184079		58.4	0.205088	0.212662	0.175094	0.181653	0.138626	0.142251	0.110588	0.113279
			58.6	0.472114	0.4725	0.442889	0.448618	0.316879	0.315913	0.232289	0.235474		58.6	0.0596782	0.0615176	0.0447523	0.0457722	0.0276496	0.028194	0.0175346	0.0184165		58.6	0.205048	0.212803	0.175384	0.181759	0.138516	0.142319	0.11029	0.113355
			58.8	0.472115	0.472573	0.442523	0.448706	0.317407	0.316366	0.232989	0.235955		58.8	0.0600146	0.0615893	0.045316	0.0458336	0.0279894	0.0282145	0.0174023	0.0184251		58.8	0.205131	0.212944	0.176244	0.181864	0.138367	0.142387	0.11069	0.11343
			59	0.472244	0.472647	0.442256	0.448792	0.317757	0.316817	0.233457	0.236433		59	0.0604208	0.0616606	0.0455179	0.0458947	0.0281563	0.0282348	0.0176828	0.0184337		59	0.20533	0.213083	0.176759	0.181969	0.138536	0.142454	0.110739	0.113505
			59.2	0.472485	0.47272	0.442633	0.448878	0.318554	0.317265	0.234493	0.23691		59.2	0.0606018	0.0617315	0.0458217	0.0459556	0.0284951	0.028255	0.0182332	0.0184422		59.2	0.205768	0.213222	0.177244	0.182073	0.138599	0.142521	0.111082	0.113579
			59.4	0.472346	0.472794	0.442483	0.448964	0.318422	0.317712	0.234662	0.237386		59.4	0.0606005	0.0618021	0.0458545	0.0460162	0.0287794	0.0282752	0.0180731	0.0184507		59.4	0.206114	0.21336	0.177139	0.182176	0.139108	0.142588	0.111468	0.113653
			59.6	0.472518	0.472867	0.442894	0.449048	0.318915	0.318156	0.235257	0.23786		59.6	0.0606638	0.0618724	0.0458026	0.0460765	0.0287421	0.0282952	0.0184183	0.0184591		59.6	0.206826	0.213498	0.177325	0.182279	0.139552	0.142653	0.112017	0.113726
			59.8	0.472541	0.47294	0.443453	0.449132	0.319533	0.318598	0.235634	0.238332		59.8	0.060884	0.0619422	0.0452544	0.0461365	0.0283274	0.0283151	0.0183842	0.0184675		59.8	0.207276	0.213634	0.177709	0.182381	0.139522	0.142719	0.112519	0.113799
			60	0.472784	0.473014	0.443368	0.449215	0.320064	0.319038	0.236673	0.238803		60	0.0610016	0.0620118	0.04534	0.0461962	0.0287728	0.028335	0.0187264	0.0184759		60	0.208069	0.21377	0.177455	0.182482	0.139906	0.142784	0.112883	0.113871
			60.2	0.472704	0.473087	0.443465	0.449298	0.320341	0.319475	0.236782	0.239273		60.2	0.060786	0.0620809	0.044882	0.0462557	0.0286877	0.0283547	0.0187516	0.0184842		60.2	0.208636	0.213904	0.177579	0.182583	0.139971	0.142849	0.113143	0.113943
			60.4	0.472957	0.47316	0.443713	0.44938	0.320377	0.319911	0.237089	0.239741		60.4	0.06045	0.0621498	0.0443538	0.0463149	0.0286396	0.0283744	0.0185875	0.0184925		60.4	0.208977	0.214038	0.178178	0.182683	0.140382	0.142913	0.113804	0.114014
			60.6	0.4728	0.473233	0.443699	0.449461	0.320709	0.320344	0.237287	0.240208		60.6	0.0600357	0.0622182	0.0444612	0.0463738	0.0280044	0.0283939	0.0187043	0.0185008		60.6	0.209466	0.214172	0.177914	0.182783	0.140695	0.142976	0.11367	0.114085
			60.8	0.472719	0.473306	0.44407	0.449542	0.321127	0.320775	0.237671	0.240673		60.8	0.0596559	0.0622864	0.0441093	0.0464324	0.027537	0.0284134	0.0185976	0.018509		60.8	0.209644	0.214304	0.177622	0.182882	0.141005	0.14304	0.113528	0.114155
			61	0.472902	0.473379	0.444448	0.449622	0.321765	0.321204	0.238586	0.241137		61	0.0591152	0.0623542	0.0437653	0.0464908	0.0270442	0.0284328	0.0185732	0.0185172		61	0.209718	0.214436	0.177786	0.182981	0.141256	0.143103	0.113485	0.114225
			61.2	0.472967	0.473452	0.444665	0.449702	0.322302	0.321631	0.239114	0.241599		61.2	0.059188	0.0624216	0.043736	0.0465489	0.027073	0.028452	0.0185771	0.0185253		61.2	0.210177	0.214567	0.177943	0.183078	0.141382	0.143165	0.113919	0.114295
			61.4	0.473486	0.473525	0.445209	0.449781	0.32297	0.322055	0.239686	0.24206		61.4	0.0594234	0.0624888	0.0444989	0.0466068	0.0268105	0.0284712	0.0185713	0.0185334		61.4	0.209978	0.214697	0.177912	0.183176	0.141639	0.143227	0.113543	0.114363
			61.6	0.47352	0.473598	0.445168	0.44986	0.323298	0.322478	0.239624	0.24252		61.6	0.0596369	0.0625556	0.0452417	0.0466643	0.0267194	0.0284903	0.0193039	0.0185415		61.6	0.210079	0.214826	0.178182	0.183272	0.141618	0.143289	0.11303	0.114432
			61.8	0.473869	0.473671	0.445462	0.449938	0.3236	0.322898	0.240251	0.242978		61.8	0.0598247	0.062622	0.0455209	0.0467217	0.0264959	0.0285093	0.0195052	0.0185495		61.8	0.210456	0.214955	0.178688	0.183369	0.142049	0.143351	0.113223	0.1145
			62	0.474229	0.473744	0.445749	0.450015	0.324067	0.323317	0.240934	0.243434		62	0.0599745	0.0626882	0.0462071	0.0467787	0.0265112	0.0285283	0.0198485	0.0185576		62	0.210243	0.215082	0.178566	0.183464	0.142207	0.143412	0.113293	0.114567
			62.2	0.474321	0.473817	0.446209	0.450092	0.324585	0.323733	0.241842	0.24389		62.2	0.0597249	0.062754	0.0460241	0.0468355	0.026377	0.0285471	0.0197381	0.0185655		62.2	0.20994	0.21521	0.178607	0.183559	0.14181	0.143472	0.112821	0.114634
			62.4	0.474612	0.473889	0.446243	0.450168	0.325194	0.324147	0.2427	0.244343		62.4	0.0604601	0.0628195	0.046451	0.0468921	0.0267861	0.0285659	0.0199594	0.0185735		62.4	0.209922	0.215336	0.179118	0.183654	0.14175	0.143532	0.112575	0.114701
			62.6	0.474634	0.473962	0.446269	0.450244	0.325761	0.324559	0.243406	0.244796		62.6	0.061206	0.0628847	0.0465923	0.0469484	0.0271429	0.0285845	0.0199614	0.0185814		62.6	0.209746	0.215462	0.179416	0.183748	0.141739	0.143592	0.112413	0.114767
			62.8	0.474838	0.474035	0.446076	0.45032	0.326387	0.324969	0.243932	0.245247		62.8	0.0617076	0.0629496	0.0468099	0.0470045	0.0275768	0.0286031	0.0200284	0.0185893		62.8	0.209406	0.215587	0.179929	0.183841	0.141743	0.143652	0.112638	0.114833
			63	0.474694	0.474108	0.446164	0.450394	0.326812	0.325377	0.24447	0.245696		63	0.0616708	0.0630141	0.0468075	0.0470603	0.0272849	0.0286216	0.0197907	0.0185972		63	0.209423	0.215711	0.180412	0.183934	0.141699	0.143711	0.112762	0.114898
			63.2	0.475173	0.47418	0.446529	0.450469	0.327125	0.325783	0.245032	0.246145		63.2	0.0619806	0.0630784	0.0469806	0.0471158	0.0275998	0.02864	0.0203589	0.018605		63.2	0.209184	0.215834	0.180269	0.184026	0.141834	0.14377	0.112783	0.114963
			63.4	0.475143	0.474253	0.446401	0.450543	0.327349	0.326187	0.245673	0.246591		63.4	0.0622285	0.0631423	0.0467752	0.0471711	0.0275202	0.0286584	0.020057	0.0186128		63.4	0.209514	0.215957	0.180603	0.184118	0.142421	0.143828	0.113282	0.115027
			63.6	0.475423	0.474325	0.446466	0.450616	0.328036	0.326589	0.246422	0.247037		63.6	0.0627105	0.0632059	0.046795	0.0472262	0.0278699	0.0286766	0.0205107	0.0186205		63.6	0.209931	0.216079	0.181134	0.184209	0.142645	0.143886	0.113791	0.115091
			63.8	0.475134	0.474398	0.446124	0.450689	0.328125	0.326989	0.246528	0.247481		63.8	0.0628109	0.0632692	0.0463248	0.047281	0.0275809	0.0286948	0.0201403	0.0186283		63.8	0.210188	0.216201	0.180895	0.1843	0.142808	0.143944	0.114388	0.115154
			64	0.47548	0.47447	0.445913	0.450762	0.328309	0.327387	0.246748	0.247923		64	0.0626095	0.0633322	0.0455527	0.0473356	0.0277599	0.0287129	0.0199061	0.018636		64	0.210305	0.216322	0.180464	0.18439	0.143152	0.144001	0.114718	0.115217
			64.2	0.475472	0.474543	0.445677	0.450834	0.328548	0.327784	0.246653	0.248365		64.2	0.0627802	0.063395	0.0450015	0.0473899	0.0278321	0.0287309	0.0196044	0.0186437		64.2	0.210639	0.216442	0.18066	0.18448	0.143554	0.144058	0.115359	0.11528
			64.4	0.475375	0.474615	0.44584	0.450905	0.328843	0.328178	0.247064	0.248805		64.4	0.0631519	0.0634574	0.04493	0.047444	0.0281225	0.0287489	0.019623	0.0186513		64.4	0.210491	0.216561	0.180106	0.184569	0.143464	0.144115	0.115665	0.115342
			64.6	0.47487	0.474687	0.445663	0.450977	0.329058	0.32857	0.246794	0.249243		64.6	0.0630754	0.0635195	0.0456983	0.0474979	0.0281158	0.0287668	0.0197694	0.0186589		64.6	0.210511	0.21668	0.179856	0.184658	0.14361	0.144171	0.115396	0.115404
			64.8	0.474695	0.47476	0.445291	0.451047	0.329091	0.32896	0.246559	0.24968		64.8	0.0625437	0.0635813	0.0450069	0.0475515	0.0277967	0.0287845	0.0194442	0.0186665		64.8	0.21063	0.216798	0.179915	0.184746	0.143369	0.144227	0.115256	0.115465
			65	0.474878	0.474832	0.445452	0.451118	0.329084	0.329348	0.246988	0.250116		65	0.0627935	0.0636429	0.0451002	0.0476049	0.0278281	0.0288023	0.0198272	0.0186741		65	0.211273	0.216916	0.180259	0.184834	0.143457	0.144283	0.115436	0.115526
			65.2	0.474923	0.474904	0.445396	0.451188	0.329024	0.329735	0.246917	0.25055		65.2	0.0626882	0.0637041	0.0455863	0.0476581	0.0278248	0.0288199	0.0197227	0.0186817		65.2	0.2119	0.217033	0.180066	0.184921	0.143649	0.144339	0.115739	0.115586
			65.4	0.474616	0.474976	0.445607	0.451257	0.329003	0.330119	0.24682	0.250984		65.4	0.0627068	0.0637651	0.0459751	0.047711	0.0277687	0.0288375	0.0198075	0.0186892		65.4	0.211732	0.217149	0.180413	0.185008	0.144077	0.144394	0.115591	0.115646
			65.6	0.474511	0.475048	0.445511	0.451326	0.329446	0.330502	0.247188	0.251415		65.6	0.0625298	0.0638257	0.0457644	0.0477637	0.0280494	0.028855	0.0197516	0.0186967		65.6	0.21219	0.217265	0.180707	0.185094	0.144519	0.144448	0.115641	0.115706
			65.8	0.47472	0.475121	0.446058	0.451395	0.329641	0.330882	0.247754	0.251846		65.8	0.0622766	0.0638861	0.0454662	0.0478162	0.0280817	0.0288724	0.0195027	0.0187041		65.8	0.212674	0.21738	0.181365	0.18518	0.144956	0.144503	0.116047	0.115765
			66	0.474414	0.475193	0.446296	0.451464	0.330084	0.331261	0.248345	0.252275		66	0.0619886	0.0639463	0.0457443	0.0478685	0.0284382	0.0288898	0.0196118	0.0187116		66	0.213012	0.217494	0.181302	0.185266	0.145234	0.144557	0.116136	0.115824
			66.2	0.474282	0.475265	0.446556	0.451532	0.330383	0.331638	0.248681	0.252703		66.2	0.0619283	0.0640061	0.0458787	0.0479205	0.0290049	0.028907	0.0198999	0.018719		66.2	0.213467	0.217608	0.181553	0.185351	0.144976	0.144611	0.115831	0.115883
			66.4	0.474374	0.475337	0.44638	0.451599	0.331237	0.332013	0.249485	0.253129		66.4	0.0626393	0.0640656	0.0467486	0.0479723	0.0297529	0.0289243	0.0205686	0.0187264		66.4	0.21364	0.217721	0.181497	0.185435	0.145536	0.144665	0.115532	0.115941
			66.6	0.474228	0.475409	0.446946	0.451667	0.33189	0.332387	0.25006	0.253554		66.6	0.0626302	0.0641249	0.0470192	0.0480239	0.0295663	0.0289414	0.020438	0.0187337		66.6	0.213247	0.217834	0.181188	0.185519	0.14548	0.144718	0.115177	0.115998
			66.8	0.47428	0.475481	0.446808	0.451733	0.332497	0.332758	0.25048	0.253978		66.8	0.0626032	0.0641839	0.0471086	0.0480753	0.0297295	0.0289585	0.0204785	0.0187411		66.8	0.213546	0.217946	0.18173	0.185603	0.145983	0.144771	0.114924	0.116055
			67	0.474529	0.475552	0.447182	0.4518	0.332753	0.333127	0.251095	0.2544		67	0.0625929	0.0642427	0.0473912	0.0481264	0.029778	0.0289755	0.0204747	0.0187484		67	0.213837	0.218057	0.182167	0.185686	0.146049	0.144824	0.115049	0.116112
			67.2	0.475049	0.475624	0.44743	0.451866	0.333208	0.333495	0.251745	0.254822		67.2	0.0629404	0.0643012	0.0474796	0.0481774	0.0297138	0.0289924	0.0206621	0.0187557		67.2	0.213656	0.218168	0.182013	0.185769	0.145814	0.144876	0.114843	0.116169
			67.4	0.475166	0.475696	0.447333	0.451932	0.333902	0.333861	0.252772	0.255241		67.4	0.0631646	0.0643594	0.0473061	0.0482281	0.0297423	0.0290093	0.0202069	0.018763		67.4	0.214053	0.218278	0.182641	0.185851	0.145837	0.144928	0.114963	0.116225
			67.6	0.475629	0.475768	0.4472	0.451998	0.334287	0.334225	0.253384	0.25566		67.6	0.0629898	0.0644173	0.0468798	0.0482786	0.029673	0.0290261	0.020057	0.0187702		67.6	0.21374	0.218388	0.182512	0.185933	0.145098	0.14498	0.114748	0.11628
			67.8	0.475812	0.47584	0.446874	0.452063	0.334764	0.334588	0.253884	0.256077		67.8	0.0626328	0.064475	0.0465059	0.0483289	0.0293781	0.0290429	0.0195828	0.0187775		67.8	0.213492	0.218497	0.18229	0.186015	0.14492	0.145032	0.114663	0.116336
			68	0.476436	0.475911	0.447002	0.452128	0.335613	0.334948	0.254469	0.256493		68	0.0626305	0.0645324	0.0461505	0.048379	0.0297978	0.0290596	0.0195082	0.0187847		68	0.213292	0.218606	0.182525	0.186096	0.14441	0.145083	0.114512	0.116391
			68.2	0.476563	0.475983	0.446711	0.452193	0.335882	0.335307	0.2548	0.256908		68.2	0.0629233	0.0645896	0.0471189	0.0484289	0.0296354	0.0290762	0.0198915	0.0187918		68.2	0.213391	0.218714	0.182656	0.186176	0.1439	0.145134	0.114345	0.116445
			68.4	0.47666	0.476055	0.447033	0.452257	0.33639	0.335664	0.255012	0.257321		68.4	0.0627932	0.0646465	0.0472119	0.0484786	0.0293883	0.0290928	0.0194585	0.018799		68.4	0.212846	0.218821	0.182157	0.186257	0.143006	0.145185	0.114483	0.116499
			68.6	0.477038	0.476126	0.447672	0.452321	0.336685	0.336019	0.255571	0.257733		68.6	0.0620674	0.0647031	0.0470925	0.048528	0.028941	0.0291092	0.0185611	0.0188061		68.6	0.212558	0.218928	0.182134	0.186337	0.142281	0.145235	0.113708	0.116553
			68.8	0.477184	0.476198	0.447727	0.452385	0.337016	0.336373	0.256103	0.258144		68.8	0.0619406	0.0647595	0.0466862	0.0485773	0.0284564	0.0291257	0.017975	0.0188133		68.8	0.213035	0.219035	0.1827	0.186416	0.142083	0.145286	0.113912	0.116607
			69	0.477749	0.476269	0.448314	0.452448	0.337415	0.336725	0.256885	0.258554		69	0.0623471	0.0648157	0.0467496	0.0486264	0.0284357	0.0291421	0.0177869	0.0188204		69	0.213559	0.219141	0.183026	0.186495	0.142388	0.145336	0.114431	0.11666
			69.2	0.47807	0.476341	0.448702	0.452511	0.33793	0.337075	0.257282	0.258962		69.2	0.0620252	0.0648716	0.0465067	0.0486752	0.0281595	0.0291584	0.0170404	0.0188275		69.2	0.21372	0.219246	0.183348	0.186574	0.142611	0.145385	0.114735	0.116712
			69.4	0.478555	0.476412	0.449342	0.452574	0.338636	0.337423	0.257955	0.259369		69.4	0.0619068	0.0649272	0.0462772	0.0487239	0.0279174	0.0291746	0.0163467	0.0188345		69.4	0.21358	0.219351	0.18425	0.186652	0.142755	0.145435	0.115041	0.116765
			69.6	0.47907	0.476484	0.449624	0.452636	0.339026	0.33777	0.258733	0.259775		69.6	0.0622437	0.0649826	0.0458346	0.0487723	0.0277953	0.0291908	0.0153404	0.0188416		69.6	0.213766	0.219455	0.184216	0.18673	0.142764	0.145484	0.115341	0.116817
			69.8	0.479241	0.476555	0.450213	0.452699	0.339031	0.338115	0.2591	0.260179		69.8	0.0622095	0.0650378	0.0460713	0.0488206	0.0277109	0.029207	0.0152596	0.0188486		69.8	0.214016	0.219559	0.184122	0.186807	0.142498	0.145533	0.11556	0.116868
			70	0.479188	0.476626	0.450336	0.452761	0.339632	0.338458	0.259301	0.260583		70	0.0625953	0.0650927	0.0462531	0.0488687	0.02817	0.029223	0.0153599	0.0188556		70	0.214274	0.219662	0.183705	0.186885	0.142822	0.145582	0.116138	0.11692
			70.2	0.47917	0.476698	0.450492	0.452823	0.339861	0.3388	0.259471	0.260985		70.2	0.0629655	0.0651474	0.0461564	0.0489166	0.0284755	0.0292391	0.0157145	0.0188626		70.2	0.214376	0.219765	0.183944	0.186961	0.142979	0.145631	0.116453	0.11697
			70.4	0.479312	0.476769	0.450676	0.452884	0.340416	0.33914	0.26001	0.261386		70.4	0.0635967	0.0652018	0.0464743	0.0489642	0.028908	0.029255	0.0160468	0.0188695		70.4	0.214658	0.219867	0.18379	0.187038	0.143849	0.145679	0.116582	0.117021
			70.6	0.479613	0.47684	0.451223	0.452945	0.340886	0.339478	0.26059	0.261785		70.6	0.0636478	0.0652561	0.0464294	0.0490117	0.0285797	0.0292709	0.0159944	0.0188765		70.6	0.214593	0.219969	0.18358	0.187114	0.143574	0.145727	0.11635	0.117071
			70.8	0.479459	0.476911	0.4511	0.453006	0.341198	0.339815	0.261261	0.262183		70.8	0.0637481	0.06531	0.0462238	0.049059	0.0290114	0.0292868	0.0162704	0.0188834		70.8	0.21513	0.22007	0.184106	0.187189	0.144319	0.145775	0.116428	0.117121
			71	0.479139	0.476982	0.450945	0.453067	0.341539	0.34015	0.261694	0.262581		71	0.0643788	0.0653638	0.0466572	0.0491061	0.0290903	0.0293026	0.017116	0.0188903		71	0.215354	0.220171	0.184121	0.187265	0.144512	0.145822	0.117177	0.117171
			71.2	0.478904	0.477053	0.451051	0.453127	0.341558	0.340483	0.262242	0.262976		71.2	0.0648794	0.0654173	0.0469579	0.049153	0.0292543	0.0293183	0.017507	0.0188972		71.2	0.215336	0.220271	0.184136	0.18734	0.144039	0.14587	0.117011	0.11722
			71.4	0.47894	0.477124	0.450739	0.453188	0.341763	0.340815	0.262984	0.263371		71.4	0.065156	0.0654706	0.0466976	0.0491998	0.029302	0.029334	0.0176137	0.0189041		71.4	0.215543	0.220371	0.184403	0.187414	0.144254	0.145917	0.116848	0.117269
			71.6	0.478818	0.477196	0.450055	0.453248	0.341972	0.341145	0.26338	0.263764		71.6	0.0651239	0.0655236	0.0468465	0.0492463	0.029222	0.0293497	0.0179811	0.0189109		71.6	0.215391	0.22047	0.184846	0.187489	0.14415	0.145964	0.11727	0.117317
			71.8	0.478456	0.477267	0.449699	0.453307	0.342216	0.341474	0.263227	0.264157		71.8	0.065074	0.0655764	0.0470989	0.0492927	0.0292319	0.0293652	0.0182304	0.0189178		71.8	0.215111	0.220569	0.184844	0.187562	0.144264	0.146011	0.117559	0.117365
			72	0.478329	0.477337	0.449632	0.453367	0.342314	0.341801	0.263341	0.264548		72	0.0652256	0.065629	0.047653	0.0493389	0.0292991	0.0293808	0.0190218	0.0189246		72	0.215221	0.220668	0.184665	0.187636	0.143992	0.146057	0.117706	0.117413
			72.2	0.478356	0.477408	0.449442	0.453426	0.342576	0.342126	0.263577	0.264937		72.2	0.0653502	0.0656814	0.0483758	0.0493849	0.0290365	0.0293963	0.0194176	0.0189314		72.2	0.21524	0.220766	0.184599	0.187709	0.144303	0.146103	0.117754	0.117461
			72.4	0.478281	0.477479	0.449863	0.453485	0.34324	0.34245	0.264242	0.265326		72.4	0.0649976	0.0657336	0.0482309	0.0494307	0.0289472	0.0294117	0.0193123	0.0189382		72.4	0.215233	0.220863	0.184416	0.187782	0.144378	0.146149	0.118297	0.117508
			72.6	0.478223	0.47755	0.449886	0.453544	0.343684	0.342772	0.264829	0.265713		72.6	0.0647367	0.0657855	0.048679	0.0494763	0.0290315	0.0294271	0.0190959	0.0189449		72.6	0.215518	0.22096	0.184516	0.187855	0.14435	0.146195	0.11808	0.117555
			72.8	0.478419	0.477621	0.4498	0.453603	0.343979	0.343093	0.265204	0.266099		72.8	0.0644867	0.0658373	0.0488833	0.0495218	0.0290258	0.0294424	0.0194448	0.0189517		72.8	0.21618	0.221057	0.18487	0.187927	0.145121	0.146241	0.118554	0.117601
			73	0.478702	0.477692	0.450144	0.453661	0.344424	0.343412	0.26528	0.266484		73	0.0643423	0.0658888	0.0486129	0.0495671	0.0287049	0.0294577	0.0193653	0.0189584		73	0.216164	0.221153	0.184425	0.187999	0.145341	0.146286	0.118402	0.117648
			73.2	0.478674	0.477763	0.449873	0.45372	0.344674	0.343729	0.265318	0.266868		73.2	0.0636596	0.0659401	0.0487328	0.0496122	0.0281465	0.0294729	0.0192664	0.0189652		73.2	0.216349	0.221249	0.18473	0.18807	0.145699	0.146332	0.118357	0.117694
			73.4	0.479315	0.477833	0.450185	0.453778	0.345324	0.344045	0.266075	0.267251		73.4	0.0635184	0.0659911	0.048781	0.0496571	0.0282443	0.0294881	0.0193518	0.0189719		73.4	0.2167	0.221344	0.18489	0.188142	0.145838	0.146377	0.118685	0.117739
			73.6	0.479373	0.477904	0.450418	0.453836	0.34585	0.34436	0.266559	0.267632		73.6	0.0635358	0.066042	0.0485056	0.0497019	0.0283577	0.0295032	0.0191176	0.0189786		73.6	0.217072	0.221439	0.184686	0.188213	0.145707	0.146422	0.118701	0.117785
			73.8	0.479194	0.477975	0.450688	0.453893	0.346239	0.344673	0.26638	0.268013		73.8	0.0632258	0.0660927	0.0486552	0.0497465	0.0288393	0.0295183	0.0193414	0.0189852		73.8	0.217473	0.221533	0.184882	0.188283	0.145555	0.146466	0.118568	0.11783
			74	0.479424	0.478045	0.450874	0.453951	0.346641	0.344984	0.266399	0.268392		74	0.0633606	0.0661431	0.0483275	0.0497909	0.0289882	0.0295333	0.0194341	0.0189919		74	0.217847	0.221627	0.185228	0.188354	0.146296	0.146511	0.118646	0.117874
			74.2	0.480319	0.478116	0.451428	0.454008	0.347266	0.345294	0.26747	0.26877		74.2	0.0627427	0.0661934	0.0477778	0.0498352	0.0285159	0.0295483	0.0191196	0.0189986		74.2	0.218332	0.221721	0.185829	0.188424	0.146875	0.146555	0.11856	0.117919
			74.4	0.481009	0.478186	0.452123	0.454065	0.347681	0.345603	0.268259	0.269146		74.4	0.0625546	0.0662434	0.0479114	0.0498792	0.0286793	0.0295633	0.0191202	0.0190052		74.4	0.218628	0.221814	0.185747	0.188493	0.147067	0.146599	0.117999	0.117963
			74.6	0.481327	0.478257	0.452581	0.454122	0.34796	0.34591	0.269009	0.269522		74.6	0.0626359	0.0662933	0.0482391	0.0499232	0.0290496	0.0295782	0.0193172	0.0190118		74.6	0.21866	0.221907	0.185673	0.188563	0.147081	0.146643	0.117291	0.118006
			74.8	0.481244	0.478327	0.452733	0.454179	0.348275	0.346215	0.269669	0.269896		74.8	0.0626538	0.0663429	0.0479073	0.0499669	0.0291565	0.029593	0.0190559	0.0190184		74.8	0.218518	0.221999	0.185837	0.188632	0.14715	0.146687	0.116872	0.11805
			75	0.48155	0.478398	0.452926	0.454235	0.348592	0.346519	0.26986	0.27027		75	0.0635517	0.0663923	0.0481444	0.0500105	0.0293104	0.0296078	0.0194488	0.019025		75	0.218491	0.222091	0.185578	0.188701	0.147158	0.14673	0.117058	0.118093
			75.2	0.481852	0.478468	0.453382	0.454292	0.348441	0.346822	0.27054	0.270642		75.2	0.0637104	0.0664416	0.0483614	0.0500539	0.0295656	0.0296226	0.0190923	0.0190316		75.2	0.218647	0.222182	0.186182	0.188769	0.14691	0.146774	0.11699	0.118136
			75.4	0.481927	0.478538	0.453248	0.454348	0.348477	0.347123	0.270782	0.271013		75.4	0.0638729	0.0664906	0.0481587	0.0500972	0.0293588	0.0296373	0.0189838	0.0190382		75.4	0.218357	0.222274	0.186271	0.188838	0.146916	0.146817	0.116919	0.118179
			75.6	0.48178	0.478609	0.452989	0.454404	0.348568	0.347422	0.271106	0.271383		75.6	0.0641479	0.0665395	0.0486068	0.0501403	0.0296163	0.029652	0.0187806	0.0190447		75.6	0.218011	0.222364	0.186825	0.188906	0.146473	0.14686	0.117178	0.118221
			75.8	0.481677	0.478679	0.452775	0.45446	0.34864	0.34772	0.271152	0.271751		75.8	0.0645529	0.0665881	0.0487954	0.0501832	0.0297002	0.0296666	0.0186119	0.0190513		75.8	0.218086	0.222455	0.186569	0.188973	0.146587	0.146903	0.11722	0.118263
			76	0.481794	0.478749	0.453143	0.454515	0.348958	0.348017	0.271906	0.272119		76	0.064846	0.0666366	0.0492775	0.050226	0.0300939	0.0296812	0.0187071	0.0190578		76	0.218824	0.222545	0.186713	0.189041	0.146973	0.146945	0.11767	0.118305
			76.2	0.482146	0.478819	0.453316	0.454571	0.349826	0.348313	0.27314	0.272485		76.2	0.0646725	0.0666848	0.0492884	0.0502686	0.0297536	0.0296958	0.0182092	0.0190643		76.2	0.218773	0.222634	0.186852	0.189108	0.146863	0.146988	0.118092	0.118346
			76.4	0.482249	0.47889	0.453434	0.454626	0.349969	0.348606	0.273321	0.272851		76.4	0.0646661	0.0667329	0.0493619	0.0503111	0.0297514	0.0297103	0.0183686	0.0190708		76.4	0.218877	0.222723	0.187193	0.189175	0.146443	0.14703	0.118781	0.118387
			76.6	0.482263	0.47896	0.45312	0.454681	0.349697	0.348899	0.273616	0.273215		76.6	0.0645552	0.0667808	0.0496241	0.0503534	0.0302081	0.0297248	0.0184532	0.0190773		76.6	0.219116	0.222812	0.186808	0.189241	0.146341	0.147072	0.118794	0.118428
			76.8	0.482287	0.47903	0.453311	0.454737	0.349572	0.34919	0.274112	0.273578		76.8	0.0645623	0.0668285	0.0494773	0.0503955	0.030226	0.0297392	0.0189115	0.0190838		76.8	0.219012	0.222901	0.185909	0.189308	0.146086	0.147114	0.118581	0.118469
			77	0.481991	0.4791	0.453298	0.454791	0.349831	0.34948	0.273873	0.27394		77	0.0647062	0.066876	0.04939	0.0504375	0.0298585	0.0297536	0.0190162	0.0190902		77	0.218955	0.222989	0.185818	0.189374	0.14629	0.147156	0.118818	0.118509
			77.2	0.481677	0.47917	0.452962	0.454846	0.350103	0.349768	0.274351	0.274301		77.2	0.0650914	0.0669233	0.049813	0.0504793	0.0301306	0.0297679	0.019665	0.0190967		77.2	0.219408	0.223076	0.186467	0.189439	0.14712	0.147197	0.119206	0.118549
			77.4	0.482006	0.47924	0.453461	0.454901	0.350883	0.350055	0.275069	0.27466		77.4	0.0655496	0.0669705	0.0496097	0.050521	0.0304183	0.0297822	0.0199233	0.0191031		77.4	0.21967	0.223164	0.186174	0.189505	0.147045	0.147239	0.119351	0.118589
			77.6	0.481821	0.47931	0.453661	0.454955	0.351222	0.35034	0.274866	0.275019		77.6	0.0658041	0.0670174	0.0491803	0.0505626	0.0302749	0.0297965	0.0197962	0.0191095		77.6	0.219731	0.223251	0.186766	0.18957	0.147231	0.14728	0.119211	0.118628
			77.8	0.481801	0.47938	0.453457	0.45501	0.351266	0.350625	0.274736	0.275377		77.8	0.0661888	0.0670642	0.0496078	0.050604	0.0305402	0.0298107	0.0200799	0.019116		77.8	0.219964	0.223337	0.186416	0.189635	0.147408	0.147321	0.119407	0.118667
			78	0.482377	0.47945	0.453957	0.455064	0.351767	0.350907	0.275522	0.275733		78	0.0660121	0.0671108	0.0492808	0.0506452	0.0294274	0.0298249	0.0198016	0.0191224		78	0.220331	0.223424	0.186162	0.1897	0.147701	0.147362	0.119553	0.118706
			78.2	0.483067	0.47952	0.454496	0.455118	0.352454	0.351189	0.276513	0.276088		78.2	0.065974	0.0671572	0.0492032	0.0506863	0.0293455	0.0298391	0.0196033	0.0191288		78.2	0.220227	0.223509	0.186307	0.189764	0.147523	0.147403	0.119442	0.118745
			78.4	0.482521	0.47959	0.454586	0.455172	0.352771	0.351469	0.276547	0.276443		78.4	0.0661147	0.0672035	0.0497674	0.0507272	0.0296491	0.0298532	0.0198235	0.0191351		78.4	0.220195	0.223595	0.186393	0.189829	0.147768	0.147444	0.119383	0.118783
			78.6	0.482233	0.479659	0.45429	0.455226	0.353249	0.351748	0.277097	0.276796		78.6	0.0662699	0.0672496	0.049802	0.050768	0.0295319	0.0298673	0.0195862	0.0191415		78.6	0.219905	0.22368	0.186495	0.189893	0.147982	0.147484	0.119162	0.118822
			78.8	0.482417	0.479729	0.454146	0.455279	0.353929	0.352025	0.277656	0.277148		78.8	0.0665329	0.0672955	0.049829	0.0508087	0.0292132	0.0298813	0.0194819	0.0191479		78.8	0.219598	0.223765	0.186078	0.189956	0.147662	0.147525	0.118948	0.118859
			79	0.482225	0.479799	0.453879	0.455333	0.354289	0.352301	0.277691	0.277499		79	0.0667537	0.0673412	0.0499438	0.0508492	0.0292521	0.0298953	0.0197745	0.0191542		79	0.220348	0.22385	0.186525	0.19002	0.148595	0.147565	0.119524	0.118897
			79.2	0.482045	0.479868	0.453783	0.455386	0.354673	0.352576	0.278366	0.277849		79.2	0.0665799	0.0673867	0.0500805	0.0508896	0.0288416	0.0299093	0.0194893	0.0191606		79.2	0.220869	0.223934	0.187385	0.190083	0.148708	0.147605	0.119912	0.118934
			79.4	0.482192	0.479938	0.453895	0.455439	0.35501	0.35285	0.278758	0.278198		79.4	0.0667072	0.0674321	0.0501266	0.0509298	0.0283452	0.0299232	0.0192643	0.0191669		79.4	0.220718	0.224018	0.187056	0.190146	0.148331	0.147645	0.119845	0.118972
			79.6	0.481972	0.480008	0.453618	0.455493	0.355601	0.353122	0.279063	0.278545		79.6	0.0666841	0.0674773	0.0500042	0.0509699	0.02827	0.0299371	0.0185442	0.0191732		79.6	0.220946	0.224101	0.18749	0.190209	0.148383	0.147685	0.119845	0.119008
			79.8	0.482295	0.480077	0.45419	0.455546	0.356411	0.353393	0.279681	0.278892		79.8	0.0660968	0.0675224	0.0494897	0.0510098	0.028084	0.029951	0.0181115	0.0191795		79.8	0.221636	0.224185	0.187076	0.190271	0.148713	0.147724	0.120147	0.119045
			80	0.482681	0.480147	0.454579	0.455599	0.356791	0.353663	0.280236	0.279238		80	0.0656102	0.0675673	0.0491762	0.0510496	0.0278629	0.0299648	0.0178018	0.0191858		80	0.222212	0.224267	0.18734	0.190334	0.148713	0.147764	0.120412	0.119081
			80.2	0.48303	0.480216	0.454636	0.455651	0.357102	0.353931	0.281049	0.279582		80.2	0.0647414	0.067612	0.0488593	0.0510893	0.0273644	0.0299786	0.0173958	0.0191921		80.2	0.221273	0.22435	0.186986	0.190396	0.148023	0.147803	0.120082	0.119118
			80.4	0.483	0.480286	0.45492	0.455704	0.356727	0.354198	0.280983	0.279926		80.4	0.0646814	0.0676565	0.049285	0.0511288	0.0279293	0.0299923	0.0181116	0.0191984		80.4	0.221617	0.224432	0.187486	0.190458	0.148135	0.147842	0.119943	0.119153
			80.6	0.482919	0.480355	0.455206	0.455757	0.356463	0.354464	0.281586	0.280268		80.6	0.0644621	0.0677009	0.0492488	0.0511682	0.0282972	0.0300061	0.0184447	0.0192047		80.6	0.221612	0.224514	0.187137	0.190519	0.148475	0.147881	0.119553	0.119189
			80.8	0.483051	0.480425	0.455669	0.455809	0.356504	0.354728	0.281884	0.28061		80.8	0.0647965	0.0677452	0.0491249	0.0512075	0.0284307	0.0300198	0.0185267	0.0192109		80.8	0.221231	0.224596	0.187226	0.190581	0.148172	0.14792	0.118879	0.119224
			81	0.483105	0.480494	0.456071	0.455861	0.35691	0.354992	0.281891	0.28095		81	0.0650342	0.0677892	0.0493741	0.0512466	0.0287904	0.0300334	0.0187815	0.0192172		81	0.221561	0.224677	0.188004	0.190642	0.148871	0.147959	0.118939	0.119259
			81.2	0.483321	0.480563	0.456087	0.455914	0.356985	0.355254	0.282205	0.281289		81.2	0.0652301	0.0678331	0.0496991	0.0512856	0.0290286	0.030047	0.0191058	0.0192234		81.2	0.221393	0.224758	0.188416	0.190703	0.149069	0.147998	0.118641	0.119294
			81.4	0.483874	0.480633	0.456567	0.455966	0.35747	0.355514	0.282196	0.281628		81.4	0.0649904	0.0678769	0.0494146	0.0513245	0.0292003	0.0300606	0.0189858	0.0192297		81.4	0.221596	0.224839	0.188734	0.190764	0.148769	0.148036	0.118428	0.119329
			81.6	0.483894	0.480702	0.456162	0.456018	0.357032	0.355774	0.282035	0.281965		81.6	0.0652778	0.0679205	0.0493263	0.0513632	0.0290312	0.0300742	0.0194079	0.0192359		81.6	0.221941	0.224919	0.189416	0.190824	0.148743	0.148075	0.11884	0.119363
			81.8	0.484609	0.480771	0.456439	0.45607	0.357504	0.356032	0.282285	0.282301		81.8	0.0653897	0.0679639	0.0496341	0.0514018	0.0291811	0.0300877	0.0194853	0.0192421		81.8	0.222132	0.224999	0.189297	0.190885	0.148518	0.148113	0.119161	0.119398
			82	0.484803	0.48084	0.45678	0.456121	0.357487	0.35629	0.28261	0.282636		82	0.065295	0.0680072	0.0494736	0.0514403	0.0285163	0.0301012	0.019114	0.0192483		82	0.222178	0.225079	0.189719	0.190945	0.148441	0.148151	0.11902	0.119432
			82.2	0.484822	0.48091	0.456538	0.456173	0.357838	0.356545	0.28298	0.28297		82.2	0.0660092	0.0680503	0.050094	0.0514786	0.0295264	0.0301147	0.0194481	0.0192545		82.2	0.22218	0.225159	0.190325	0.191005	0.148585	0.148189	0.119158	0.119465
			82.4	0.484616	0.480979	0.456321	0.456225	0.358409	0.3568	0.28309	0.283303		82.4	0.0657609	0.0680933	0.04965	0.0515168	0.0292105	0.0301281	0.0193176	0.0192607		82.4	0.22225	0.225238	0.190437	0.191064	0.148909	0.148227	0.119412	0.119499
			82.6	0.484708	0.481048	0.45605	0.456276	0.358688	0.357054	0.283247	0.283636		82.6	0.0657179	0.0681361	0.0497746	0.0515549	0.0289472	0.0301415	0.0195939	0.0192669		82.6	0.222013	0.225317	0.190646	0.191124	0.148874	0.148265	0.119401	0.119532
			82.8	0.484262	0.481117	0.455821	0.456328	0.358617	0.357306	0.283087	0.283967		82.8	0.0659627	0.0681788	0.0498116	0.0515929	0.0290712	0.0301549	0.0202977	0.019273		82.8	0.22244	0.225396	0.190684	0.191183	0.148689	0.148303	0.119344	0.119565
			83	0.484031	0.481186	0.45587	0.456379	0.359097	0.357557	0.283249	0.284297		83	0.0661237	0.0682213	0.0499206	0.0516307	0.0290593	0.0301682	0.0206601	0.0192792		83	0.22258	0.225474	0.191425	0.191242	0.14924	0.14834	0.120129	0.119598
			83.2	0.484888	0.481255	0.456437	0.45643	0.359783	0.357807	0.284243	0.284626		83.2	0.0664372	0.0682637	0.0499246	0.0516684	0.028602	0.0301816	0.0207068	0.0192854		83.2	0.222499	0.225552	0.191454	0.191301	0.148898	0.148377	0.120059	0.11963
			83.4	0.484466	0.481324	0.455903	0.456481	0.35983	0.358056	0.284075	0.284954		83.4	0.0664549	0.0683059	0.0499496	0.051706	0.0286968	0.0301948	0.020681	0.0192915		83.4	0.222124	0.22563	0.190622	0.19136	0.148758	0.148415	0.120115	0.119663
			83.6	0.483891	0.481393	0.455751	0.456533	0.35974	0.358303	0.284144	0.285281		83.6	0.0661816	0.068348	0.049779	0.0517435	0.0290729	0.0302081	0.0206004	0.0192977		83.6	0.221917	0.225707	0.190665	0.191418	0.148903	0.148452	0.119875	0.119695
			83.8	0.484237	0.481462	0.456104	0.456583	0.35995	0.35855	0.285237	0.285607		83.8	0.0655592	0.0683899	0.0496486	0.0517808	0.0290696	0.0302213	0.0205392	0.0193038		83.8	0.222126	0.225785	0.190509	0.191477	0.149795	0.148489	0.120241	0.119727
			84	0.483845	0.48153	0.455531	0.456634	0.359709	0.358795	0.285372	0.285932		84	0.0654532	0.0684317	0.0497622	0.051818	0.0287004	0.0302345	0.0206936	0.0193099		84	0.222298	0.225862	0.19091	0.191535	0.150035	0.148526	0.120264	0.119758
			84.2	0.483455	0.481599	0.455568	0.456685	0.359713	0.359039	0.285836	0.286256		84.2	0.0648872	0.0684734	0.0501229	0.0518551	0.0288204	0.0302477	0.0204607	0.019316		84.2	0.2216	0.225938	0.190745	0.191593	0.15005	0.148563	0.119649	0.11979
			84.4	0.483312	0.481668	0.455637	0.456736	0.359871	0.359282	0.286346	0.286579		84.4	0.0652628	0.0685149	0.0503798	0.0518921	0.0295416	0.0302608	0.0207627	0.0193221		84.4	0.222108	0.226015	0.191485	0.19165	0.150356	0.148599	0.119698	0.119821
			84.6	0.483373	0.481737	0.455675	0.456786	0.359906	0.359524	0.286733	0.286901		84.6	0.0655016	0.0685563	0.0503386	0.0519289	0.0298899	0.030274	0.0205115	0.0193282		84.6	0.222076	0.226091	0.191584	0.191708	0.150493	0.148636	0.119479	0.119852
			84.8	0.483406	0.481805	0.455188	0.456837	0.360307	0.359765	0.287156	0.287223		84.8	0.0657099	0.0685975	0.0503443	0.0519657	0.0301231	0.0302871	0.0200454	0.0193343		84.8	0.222526	0.226167	0.191667	0.191765	0.150351	0.148672	0.119346	0.119883
			85	0.483765	0.481874	0.455401	0.456887	0.360674	0.360004	0.287391	0.287543		85	0.0655447	0.0686386	0.0508701	0.0520023	0.0300958	0.0303001	0.0199103	0.0193404		85	0.223138	0.226243	0.191988	0.191822	0.150721	0.148709	0.119557	0.119914
			85.2	0.483848	0.481943	0.455426	0.456938	0.360597	0.360243	0.287637	0.287862		85.2	0.0653209	0.0686796	0.0506065	0.0520388	0.0293909	0.0303132	0.0192486	0.0193465		85.2	0.223084	0.226318	0.191927	0.191879	0.150349	0.148745	0.119522	0.119944
			85.4	0.484027	0.482011	0.455499	0.456988	0.360922	0.36048	0.288086	0.28818		85.4	0.0653135	0.0687204	0.0504431	0.0520752	0.0293452	0.0303262	0.0185176	0.0193526		85.4	0.224416	0.226393	0.192227	0.191936	0.150371	0.148781	0.120153	0.119974
			85.6	0.483839	0.48208	0.455231	0.457038	0.36041	0.360716	0.288458	0.288497		85.6	0.0658304	0.0687611	0.0507795	0.0521115	0.0293403	0.0303391	0.0187046	0.0193586		85.6	0.224366	0.226468	0.192075	0.191993	0.150182	0.148817	0.120272	0.120004
			85.8	0.484442	0.482149	0.455659	0.457089	0.361025	0.360952	0.288528	0.288814		85.8	0.0658151	0.0688016	0.0506442	0.0521477	0.0292091	0.0303521	0.0178934	0.0193647		85.8	0.224419	0.226543	0.191422	0.192049	0.149664	0.148853	0.120153	0.120034
			86	0.484485	0.482217	0.455349	0.457139	0.360996	0.361186	0.288751	0.289129		86	0.0657996	0.068842	0.0505721	0.0521837	0.0285314	0.030365	0.0174589	0.0193708		86	0.224106	0.226617	0.191527	0.192106	0.149301	0.148889	0.119632	0.120064
			86.2	0.484341	0.482286	0.455348	0.457189	0.361502	0.361419	0.289227	0.289443		86.2	0.0659358	0.0688823	0.0506257	0.0522196	0.028825	0.0303779	0.0175656	0.0193768		86.2	0.22453	0.226691	0.191451	0.192162	0.148981	0.148925	0.119346	0.120093
			86.4	0.484255	0.482354	0.455513	0.457238	0.361545	0.36165	0.288837	0.289757		86.4	0.0654628	0.0689225	0.0498557	0.0522555	0.0280521	0.0303908	0.0172203	0.0193828		86.4	0.224639	0.226765	0.191215	0.192218	0.148474	0.14896	0.119149	0.120122
			86.6	0.484098	0.482422	0.454921	0.457288	0.361281	0.361881	0.288715	0.290069		86.6	0.0657689	0.0689625	0.0504951	0.0522912	0.0282562	0.0304037	0.0174545	0.0193889		86.6	0.224711	0.226839	0.191194	0.192273	0.148369	0.148996	0.119186	0.120151
			86.8	0.483994	0.482491	0.454907	0.457338	0.36141	0.362111	0.288718	0.29038		86.8	0.0662851	0.0690024	0.0508813	0.0523268	0.0285703	0.0304165	0.0180214	0.0193949		86.8	0.225053	0.226912	0.190874	0.192329	0.148305	0.149031	0.119196	0.12018
			87	0.484356	0.482559	0.455216	0.457388	0.361998	0.36234	0.28918	0.290691		87	0.0668394	0.0690421	0.0517047	0.0523623	0.0290854	0.0304293	0.0183705	0.0194009		87	0.225271	0.226985	0.190746	0.192384	0.148812	0.149067	0.119588	0.120209
			87.2	0.484496	0.482627	0.455044	0.457437	0.361862	0.362567	0.289219	0.291		87.2	0.0669396	0.0690818	0.0520731	0.0523977	0.0291377	0.0304421	0.018315	0.0194069		87.2	0.22559	0.227058	0.190604	0.19244	0.148867	0.149102	0.12013	0.120237
			87.4	0.483571	0.482696	0.454389	0.457487	0.361884	0.362794	0.288977	0.291309		87.4	0.0668989	0.0691213	0.0521044	0.0524329	0.029622	0.0304548	0.0182074	0.0194129		87.4	0.225209	0.227131	0.190179	0.192495	0.14872	0.149137	0.120295	0.120265
			87.6	0.483647	0.482764	0.454716	0.457536	0.362023	0.363019	0.289368	0.291617		87.6	0.0670732	0.0691607	0.0522339	0.0524681	0.0300935	0.0304676	0.018467	0.0194189		87.6	0.225494	0.227204	0.191137	0.19255	0.149252	0.149172	0.120708	0.120293
			87.8	0.483969	0.482832	0.454811	0.457586	0.362683	0.363244	0.290161	0.291924		87.8	0.0669888	0.0691999	0.0520553	0.0525032	0.0298725	0.0304803	0.0184801	0.0194249		87.8	0.225822	0.227276	0.191431	0.192604	0.150203	0.149207	0.121452	0.120321
			88	0.484233	0.4829	0.455259	0.457635	0.363436	0.363467	0.290241	0.292229		88	0.067299	0.069239	0.0526682	0.0525381	0.0300397	0.030493	0.0188197	0.0194309		88	0.225989	0.227348	0.191543	0.192659	0.150198	0.149242	0.121731	0.120349
			88.2	0.484709	0.482968	0.455589	0.457685	0.364273	0.363689	0.291076	0.292534		88.2	0.0677924	0.069278	0.0529084	0.052573	0.0307922	0.0305056	0.0192646	0.0194369		88.2	0.226038	0.22742	0.191783	0.192713	0.151261	0.149276	0.121791	0.120376
			88.4	0.485482	0.483036	0.455876	0.457734	0.364982	0.363911	0.291842	0.292838		88.4	0.068211	0.0693169	0.0526336	0.0526077	0.0312114	0.0305183	0.0196972	0.0194429		88.4	0.226081	0.227491	0.192042	0.192768	0.151568	0.149311	0.121628	0.120403
			88.6	0.485928	0.483104	0.456454	0.457783	0.365421	0.364131	0.292134	0.293141		88.6	0.0681457	0.0693557	0.0526327	0.0526424	0.0309196	0.0305309	0.0198387	0.0194489		88.6	0.226092	0.227562	0.192307	0.192822	0.152324	0.149345	0.121785	0.12043
			88.8	0.486048	0.483173	0.456607	0.457832	0.365754	0.36435	0.292644	0.293443		88.8	0.0679037	0.0693943	0.0523734	0.0526769	0.0307025	0.0305435	0.020026	0.0194548		88.8	0.226335	0.227634	0.192371	0.192876	0.152241	0.14938	0.121878	0.120457
			89	0.48664	0.483241	0.457218	0.457881	0.365545	0.364569	0.292913	0.293744		89	0.0677427	0.0694329	0.0526422	0.0527114	0.0307315	0.0305561	0.0201986	0.0194608		89	0.226399	0.227704	0.192545	0.19293	0.151977	0.149414	0.121668	0.120484
			89.2	0.486536	0.483308	0.457544	0.45793	0.365836	0.364786	0.293534	0.294045		89.2	0.0675102	0.0694713	0.0519783	0.0527457	0.0301125	0.0305686	0.0197033	0.0194668		89.2	0.226438	0.227775	0.192567	0.192983	0.151676	0.149448	0.121616	0.12051
			89.4	0.486916	0.483376	0.457621	0.457979	0.366003	0.365002	0.29424	0.294344		89.4	0.0670779	0.0695095	0.0515667	0.0527799	0.0299224	0.0305811	0.0192095	0.0194727		89.4	0.226444	0.227846	0.192889	0.193037	0.151457	0.149483	0.121497	0.120537
			89.6	0.487365	0.483444	0.457738	0.458028	0.365588	0.365218	0.295112	0.294643		89.6	0.0668134	0.0695477	0.0507331	0.0528141	0.0295284	0.0305936	0.019061	0.0194786		89.6	0.225545	0.227916	0.192853	0.19309	0.150976	0.149517	0.120834	0.120563
			89.8	0.487712	0.483512	0.457607	0.458077	0.365954	0.365432	0.295401	0.29494		89.8	0.0664232	0.0695858	0.0501379	0.0528481	0.0290448	0.0306061	0.0185493	0.0194846		89.8	0.22571	0.227986	0.193076	0.193144	0.150595	0.149551	0.12059	0.120589
			90	0.48798	0.48358	0.45795	0.458125	0.366231	0.365645	0.296064	0.295237		90	0.0664506	0.0696237	0.0499064	0.052882	0.0288984	0.0306186	0.0188695	0.0194905		90	0.225487	0.228056	0.194115	0.193197	0.150422	0.149584	0.120247	0.120615
			90.2	0.488026	0.483648	0.458403	0.458174	0.366582	0.365858	0.29678	0.295533		90.2	0.0668847	0.0696615	0.0503647	0.0529159	0.0290978	0.030631	0.0190969	0.0194964		90.2	0.225937	0.228125	0.194153	0.19325	0.150396	0.149618	0.120156	0.12064
			90.4	0.488352	0.483715	0.458289	0.458223	0.366537	0.366069	0.29668	0.295827		90.4	0.0667731	0.0696992	0.0501814	0.0529496	0.0290341	0.0306435	0.0187115	0.0195024		90.4	0.226542	0.228195	0.194152	0.193302	0.150319	0.149652	0.120625	0.120666
			90.6	0.488273	0.483783	0.457662	0.458271	0.366597	0.366279	0.297051	0.296121		90.6	0.0670418	0.0697368	0.0503806	0.0529833	0.0292888	0.0306559	0.0184901	0.0195083		90.6	0.227285	0.228264	0.193979	0.193355	0.15086	0.149686	0.120754	0.120691
			90.8	0.488113	0.483851	0.457706	0.45832	0.366864	0.366489	0.296808	0.296414		90.8	0.0671339	0.0697743	0.0506891	0.0530168	0.0293957	0.0306683	0.018499	0.0195142		90.8	0.227534	0.228333	0.194039	0.193407	0.150708	0.149719	0.120687	0.120716
			91	0.487492	0.483919	0.457169	0.458368	0.366478	0.366697	0.296729	0.296707		91	0.0676137	0.0698117	0.0511595	0.0530503	0.02957	0.0306806	0.0182039	0.0195201		91	0.228027	0.228402	0.194212	0.19346	0.150667	0.149753	0.121371	0.120741
			91.2	0.487319	0.483986	0.456928	0.458417	0.366214	0.366905	0.296584	0.296998		91.2	0.0680691	0.0698489	0.0514128	0.0530836	0.0298791	0.030693	0.0181324	0.019526		91.2	0.227826	0.22847	0.194353	0.193512	0.150407	0.149786	0.12184	0.120766
			91.4	0.487282	0.484054	0.456986	0.458465	0.366915	0.367111	0.297062	0.297288		91.4	0.0685017	0.0698861	0.0514357	0.0531169	0.0304062	0.0307053	0.0183098	0.0195319		91.4	0.228157	0.228539	0.19476	0.193564	0.150742	0.149819	0.121823	0.12079
			91.6	0.487247	0.484121	0.456769	0.458513	0.36721	0.367317	0.297524	0.297578		91.6	0.0692125	0.0699231	0.0518607	0.05315	0.0309422	0.0307176	0.0186299	0.0195378		91.6	0.228632	0.228607	0.194979	0.193616	0.151551	0.149852	0.122033	0.120815
			91.8	0.487665	0.484189	0.4569	0.458562	0.367777	0.367522	0.298219	0.297866		91.8	0.0693973	0.0699601	0.0522223	0.0531831	0.0309159	0.0307299	0.0189037	0.0195437		91.8	0.228506	0.228675	0.194281	0.193668	0.151794	0.149886	0.121969	0.120839
			92	0.488066	0.484256	0.457521	0.45861	0.368312	0.367725	0.298756	0.298154		92	0.0700866	0.0699969	0.0532305	0.0532161	0.0319239	0.0307421	0.019969	0.0195496		92	0.228443	0.228743	0.194125	0.19372	0.15206	0.149919	0.121894	0.120863
			92.2	0.488275	0.484324	0.457495	0.458658	0.368535	0.367928	0.299504	0.298441		92.2	0.0702971	0.0700336	0.0531631	0.053249	0.0320605	0.0307544	0.0202402	0.0195555		92.2	0.228465	0.228811	0.19375	0.193771	0.152536	0.149952	0.121471	0.120887
			92.4	0.488247	0.484391	0.457369	0.458706	0.368351	0.36813	0.299583	0.298727		92.4	0.070245	0.0700702	0.0532258	0.0532818	0.0316537	0.0307666	0.0201258	0.0195613		92.4	0.228446	0.228878	0.193288	0.193822	0.152509	0.149984	0.121033	0.120911
			92.6	0.488001	0.484459	0.457191	0.458754	0.36825	0.368331	0.299537	0.299012		92.6	0.0704281	0.0701067	0.0538371	0.0533145	0.0316776	0.0307788	0.0203253	0.0195672		92.6	0.228662	0.228945	0.193232	0.193874	0.152844	0.150017	0.121376	0.120934
			92.8	0.487889	0.484526	0.457003	0.458802	0.368269	0.368531	0.299836	0.299296		92.8	0.070511	0.0701431	0.0541874	0.0533471	0.0319277	0.030791	0.0206721	0.0195731		92.8	0.22828	0.229012	0.192474	0.193925	0.152143	0.15005	0.120905	0.120958
			93	0.488178	0.484593	0.457139	0.45885	0.368034	0.36873	0.299856	0.29958		93	0.0703822	0.0701794	0.0542688	0.0533797	0.0317789	0.0308032	0.0202531	0.019579		93	0.22837	0.229079	0.192626	0.193976	0.152092	0.150083	0.121089	0.120981
			93.2	0.488125	0.48466	0.457206	0.458898	0.368132	0.368929	0.300438	0.299862		93.2	0.0699341	0.0702156	0.0534585	0.0534121	0.0310899	0.0308153	0.0200034	0.0195848		93.2	0.228359	0.229146	0.193099	0.194027	0.152272	0.150115	0.121043	0.121004
			93.4	0.488467	0.484728	0.457326	0.458946	0.368263	0.369126	0.301103	0.300144		93.4	0.0692897	0.0702517	0.0531301	0.0534444	0.0308933	0.0308275	0.0196078	0.0195907		93.4	0.228051	0.229212	0.19297	0.194078	0.151875	0.150148	0.120866	0.121027
			93.6	0.488895	0.484795	0.457627	0.458994	0.368378	0.369323	0.302032	0.300425		93.6	0.0691713	0.0702877	0.0526379	0.0534767	0.0306687	0.0308396	0.0195358	0.0195965		93.6	0.227831	0.229279	0.19304	0.194128	0.151397	0.15018	0.121042	0.12105
			93.8	0.489135	0.484862	0.458027	0.459042	0.369388	0.369518	0.302346	0.300705		93.8	0.0688867	0.0703236	0.0528641	0.0535089	0.0306571	0.0308517	0.0196936	0.0196024		93.8	0.227868	0.229345	0.193478	0.194179	0.151909	0.150212	0.121198	0.121072
			94	0.489004	0.484929	0.458716	0.459089	0.369957	0.369713	0.302904	0.300984		94	0.0687744	0.0703594	0.0527759	0.053541	0.0305935	0.0308638	0.0195481	0.0196082		94	0.227698	0.229411	0.193739	0.194229	0.152049	0.150245	0.12159	0.121095
			94.2	0.48917	0.484996	0.459129	0.459137	0.37061	0.369907	0.303433	0.301263		94.2	0.0685586	0.0703951	0.0528196	0.053573	0.0301846	0.0308758	0.019255	0.019614		94.2	0.228225	0.229477	0.193625	0.194279	0.152571	0.150277	0.122133	0.121117
			94.4	0.489059	0.485063	0.459336	0.459185	0.370785	0.3701	0.303469	0.30154		94.4	0.0679127	0.0704307	0.0521569	0.0536049	0.0298859	0.0308879	0.0187192	0.0196199		94.4	0.228229	0.229542	0.193023	0.19433	0.152334	0.150309	0.122313	0.121139
			94.6	0.489188	0.48513	0.459605	0.459232	0.370896	0.370292	0.303845	0.301817		94.6	0.0680363	0.0704662	0.0517035	0.0536367	0.0295934	0.0308999	0.018626	0.0196257		94.6	0.228591	0.229608	0.193162	0.19438	0.152933	0.150341	0.12188	0.121161
			94.8	0.489321	0.485198	0.459902	0.45928	0.371411	0.370483	0.304087	0.302092		94.8	0.0682018	0.0705016	0.0516127	0.0536685	0.0296241	0.0309119	0.0187831	0.0196315		94.8	0.228389	0.229673	0.193045	0.194429	0.152392	0.150373	0.121678	0.121183
			95	0.488897	0.485264	0.460142	0.459327	0.371058	0.370673	0.304154	0.302367		95	0.0683498	0.0705369	0.0514604	0.0537002	0.0295421	0.0309239	0.0191355	0.0196374		95	0.228659	0.229738	0.192782	0.194479	0.152316	0.150405	0.122119	0.121205
			95.2	0.48917	0.485331	0.460631	0.459375	0.371341	0.370863	0.304343	0.302642		95.2	0.0682494	0.0705721	0.0513061	0.0537317	0.0297717	0.0309359	0.0194598	0.0196432		95.2	0.228755	0.229803	0.192699	0.194529	0.152319	0.150436	0.121834	0.121226
			95.4	0.489356	0.485398	0.460577	0.459422	0.371488	0.371051	0.304578	0.302915		95.4	0.0681932	0.0706072	0.0513178	0.0537632	0.0295795	0.0309479	0.0195914	0.019649		95.4	0.229239	0.229868	0.193012	0.194578	0.15268	0.150468	0.121643	0.121248
			95.6	0.489349	0.485465	0.460266	0.45947	0.371835	0.371239	0.304597	0.303187		95.6	0.06793	0.0706422	0.0512753	0.0537947	0.0291618	0.0309598	0.0192666	0.0196548		95.6	0.228774	0.229932	0.192628	0.194628	0.152236	0.1505	0.121118	0.121269
			95.8	0.489609	0.485532	0.460327	0.459517	0.371986	0.371426	0.304686	0.303459		95.8	0.0683111	0.0706772	0.051838	0.053826	0.0293068	0.0309718	0.019799	0.0196606		95.8	0.229262	0.229997	0.192789	0.194677	0.152232	0.150531	0.121365	0.12129
			96	0.489557	0.485599	0.46079	0.459564	0.372123	0.371612	0.304791	0.30373		96	0.0684662	0.070712	0.0522482	0.0538573	0.0297078	0.0309837	0.0199786	0.0196664		96	0.229586	0.230061	0.192985	0.194726	0.152124	0.150563	0.121188	0.121311
			96.2	0.489545	0.485666	0.460452	0.459612	0.371931	0.371798	0.304649	0.304		96.2	0.0682885	0.0707467	0.0527219	0.0538884	0.0290762	0.0309956	0.0194593	0.0196722		96.2	0.230117	0.230125	0.192447	0.194775	0.152152	0.150594	0.120889	0.121332
			96.4	0.489403	0.485732	0.460234	0.459659	0.372325	0.371982	0.305126	0.304269		96.4	0.0685712	0.0707814	0.0530313	0.0539195	0.0291682	0.0310075	0.0197884	0.019678		96.4	0.229992	0.230189	0.192653	0.194824	0.152066	0.150626	0.121099	0.121353
			96.6	0.4895	0.485799	0.459859	0.459706	0.3725	0.372166	0.305293	0.304538		96.6	0.0690265	0.0708159	0.0537357	0.0539505	0.0296394	0.0310193	0.0202884	0.0196838		96.6	0.229835	0.230253	0.192524	0.194873	0.151741	0.150657	0.120866	0.121373
			96.8	0.489405	0.485866	0.460111	0.459753	0.372502	0.372348	0.305298	0.304805		96.8	0.0691332	0.0708504	0.054052	0.0539815	0.0297959	0.0310312	0.0204674	0.0196896		96.8	0.229696	0.230317	0.192507	0.194922	0.151894	0.150688	0.120627	0.121394
			97	0.489218	0.485932	0.460205	0.4598	0.372545	0.37253	0.305504	0.305072		97	0.0690535	0.0708848	0.0539898	0.0540123	0.0297238	0.031043	0.0200558	0.0196954		97	0.229714	0.23038	0.192603	0.194971	0.151922	0.15072	0.120354	0.121414
			97.2	0.489117	0.485999	0.460276	0.459847	0.372769	0.372712	0.306003	0.305338		97.2	0.0687532	0.070919	0.0536241	0.0540431	0.0296638	0.0310549	0.0200028	0.0197012		97.2	0.229738	0.230443	0.192465	0.195019	0.151611	0.150751	0.119816	0.121434
			97.4	0.489297	0.486066	0.460119	0.459894	0.37317	0.372892	0.306405	0.305603		97.4	0.0686452	0.0709532	0.0537517	0.0540738	0.0296797	0.0310667	0.0196197	0.019707		97.4	0.229709	0.230506	0.192346	0.195068	0.151683	0.150782	0.120015	0.121454
			97.6	0.489008	0.486132	0.459985	0.459941	0.373017	0.373072	0.306953	0.305867		97.6	0.0685875	0.0709873	0.053509	0.0541045	0.0295803	0.0310785	0.0197052	0.0197127		97.6	0.229205	0.230569	0.192781	0.195116	0.151288	0.150813	0.120049	0.121474
			97.8	0.489341	0.486199	0.460245	0.459988	0.373699	0.37325	0.307327	0.306131		97.8	0.0686721	0.0710214	0.0536209	0.054135	0.0298953	0.0310902	0.0197104	0.0197185		97.8	0.229199	0.230632	0.193096	0.195164	0.151879	0.150844	0.12037	0.121494
			98	0.489092	0.486265	0.460259	0.460035	0.37382	0.373428	0.30773	0.306394		98	0.0691263	0.0710553	0.053441	0.0541655	0.0301952	0.031102	0.0195209	0.0197243		98	0.229325	0.230695	0.193639	0.195212	0.152136	0.150874	0.121163	0.121513
			98.2	0.489556	0.486332	0.461004	0.460082	0.374285	0.373606	0.30833	0.306656		98.2	0.0692853	0.0710891	0.0533046	0.0541959	0.0304572	0.0311138	0.0199983	0.01973		98.2	0.229176	0.230758	0.193635	0.19526	0.152249	0.150905	0.120797	0.121533
			98.4	0.489747	0.486398	0.461385	0.460129	0.374343	0.373782	0.308865	0.306917		98.4	0.0694582	0.0711229	0.0525056	0.0542262	0.0303389	0.0311255	0.0200366	0.0197358		98.4	0.228939	0.23082	0.193952	0.195308	0.152302	0.150936	0.120862	0.121552
			98.6	0.49008	0.486464	0.461397	0.460176	0.374204	0.373958	0.309422	0.307177		98.6	0.069881	0.0711566	0.0520141	0.0542565	0.0303431	0.0311372	0.0204243	0.0197416		98.6	0.229574	0.230882	0.194363	0.195356	0.152573	0.150967	0.120832	0.121571
			98.8	0.490261	0.486531	0.461619	0.460223	0.374571	0.374132	0.309736	0.307437		98.8	0.0701374	0.0711902	0.0521488	0.0542866	0.0304296	0.0311489	0.0205253	0.0197473		98.8	0.22927	0.230944	0.194217	0.195404	0.152227	0.150997	0.121012	0.12159
			99	0.490414	0.486597	0.461663	0.460269	0.374267	0.374307	0.3098	0.307696		99	0.06976	0.0712237	0.051799	0.0543167	0.0304914	0.0311606	0.0204073	0.0197531		99	0.229348	0.231006	0.194573	0.195451	0.152372	0.151028	0.121826	0.121609
			99.2	0.490584	0.486663	0.461845	0.460316	0.374305	0.37448	0.309724	0.307954		99.2	0.0699595	0.0712571	0.0519282	0.0543468	0.0309493	0.0311723	0.0202522	0.0197588		99.2	0.229282	0.231068	0.195164	0.195499	0.152597	0.151058	0.122096	0.121628
			99.4	0.490721	0.486729	0.461702	0.460363	0.374123	0.374652	0.309432	0.308211		99.4	0.0703915	0.0712905	0.0522211	0.0543767	0.0306165	0.031184	0.0200812	0.0197646		99.4	0.229435	0.23113	0.195956	0.195546	0.152773	0.151089	0.122305	0.121647
			99.6	0.490859	0.486796	0.461845	0.460409	0.374708	0.374824	0.309522	0.308468		99.6	0.0708774	0.0713237	0.0527312	0.0544066	0.0307785	0.0311956	0.0199673	0.0197703		99.6	0.229378	0.231191	0.196326	0.195594	0.15253	0.151119	0.122763	0.121665
			99.8	0.490797	0.486862	0.461897	0.460456	0.374638	0.374995	0.309649	0.308724		99.8	0.0713484	0.0713569	0.0530002	0.0544364	0.0310039	0.0312073	0.0200554	0.0197761		99.8	0.229987	0.231253	0.196702	0.195641	0.152741	0.151149	0.123209	0.121684
			100	0.490955	0.486928	0.462083	0.460503	0.374571	0.375165	0.309942	0.308979		100	0.0711115	0.07139	0.0531379	0.0544662	0.0306628	0.0312189	0.0196184	0.0197818		100	0.229864	0.231314	0.196831	0.195688	0.152949	0.15118	0.123373	0.121702
			100.2	0.491052	0.486994	0.46192	0.460549	0.374767	0.375335	0.310136	0.309233		100.2	0.071031	0.071423	0.0532596	0.0544959	0.0303037	0.0312305	0.0195063	0.0197876		100.2	0.229888	0.231375	0.197059	0.195735	0.153712	0.15121	0.123684	0.12172
			100.4	0.491218	0.48706	0.461956	0.460596	0.375151	0.375504	0.310765	0.309486		100.4	0.0715174	0.0714559	0.0532825	0.0545255	0.0306739	0.0312421	0.01979	0.0197933		100.4	0.229487	0.231436	0.197514	0.195782	0.154113	0.15124	0.123998	0.121738
			100.6	0.490997	0.487126	0.461838	0.460642	0.375088	0.375672	0.310342	0.309739		100.6	0.0719055	0.0714888	0.0535853	0.054555	0.0309844	0.0312537	0.0195579	0.019799		100.6	0.229497	0.231497	0.197573	0.195829	0.154734	0.15127	0.123687	0.121756
			100.8	0.490828	0.487192	0.462095	0.460689	0.375365	0.375839	0.310464	0.309991		100.8	0.0722535	0.0715216	0.0540617	0.0545845	0.0311795	0.0312653	0.0192376	0.0198048		100.8	0.229635	0.231557	0.197904	0.195875	0.155558	0.1513	0.123924	0.121774
			101	0.49048	0.487258	0.461427	0.460735	0.375275	0.376006	0.310478	0.310242		101	0.0719187	0.0715543	0.0539608	0.0546139	0.0313536	0.0312769	0.0187834	0.0198105		101	0.229602	0.231618	0.197679	0.195922	0.155454	0.15133	0.123659	0.121791
			101.2	0.490684	0.487324	0.461516	0.460782	0.375426	0.376171	0.310664	0.310493		101.2	0.0723513	0.0715869	0.0542271	0.0546432	0.0317463	0.0312884	0.0190428	0.0198162		101.2	0.230081	0.231678	0.197897	0.195968	0.155183	0.15136	0.123857	0.121809
			101.4	0.490696	0.48739	0.461243	0.460828	0.375319	0.376337	0.310911	0.310742		101.4	0.0721196	0.0716195	0.0541932	0.0546725	0.0317282	0.0313	0.0192881	0.0198219		101.4	0.230498	0.231739	0.198437	0.196015	0.155378	0.151389	0.124106	0.121826
			101.6	0.490671	0.487456	0.461536	0.460874	0.3755	0.376501	0.311335	0.310991		101.6	0.0717607	0.0716519	0.0540916	0.0547017	0.0317012	0.0313115	0.0194488	0.0198277		101.6	0.230687	0.231799	0.1985	0.196061	0.154893	0.151419	0.124008	0.121844
			101.8	0.490823	0.487522	0.461567	0.460921	0.376094	0.376665	0.311534	0.311239		101.8	0.0715546	0.0716843	0.0538808	0.0547308	0.0320636	0.031323	0.0190645	0.0198334		101.8	0.230957	0.231859	0.197715	0.196108	0.154498	0.151449	0.123579	0.121861
			102	0.490484	0.487588	0.46124	0.460967	0.376479	0.376828	0.311892	0.311487		102	0.0715115	0.0717166	0.053683	0.0547598	0.0322042	0.0313345	0.0192587	0.0198391		102	0.230765	0.231919	0.196701	0.196154	0.154172	0.151479	0.122816	0.121878
			102.2	0.490816	0.487653	0.462114	0.461013	0.377004	0.37699	0.312428	0.311734		102.2	0.0709637	0.0717489	0.0534811	0.0547888	0.0321111	0.031346	0.0194151	0.0198448		102.2	0.230547	0.231978	0.195964	0.1962	0.15402	0.151508	0.121696	0.121895
			102.4	0.491349	0.487719	0.462247	0.461059	0.377127	0.377151	0.313206	0.31198		102.4	0.0706841	0.071781	0.0531141	0.0548178	0.0315148	0.0313575	0.0190472	0.0198505		102.4	0.230894	0.232038	0.196028	0.196246	0.153615	0.151538	0.121535	0.121912
			102.6	0.491748	0.487785	0.462246	0.461105	0.377715	0.377312	0.313811	0.312225		102.6	0.0699973	0.0718131	0.052957	0.0548466	0.0312024	0.031369	0.0188436	0.0198562		102.6	0.23074	0.232098	0.195136	0.196292	0.153051	0.151567	0.121059	0.121929
			102.8	0.492073	0.487851	0.462566	0.461152	0.378149	0.377472	0.314166	0.312469		102.8	0.0698498	0.0718452	0.053073	0.0548754	0.0311915	0.0313804	0.0187918	0.0198619		102.8	0.229849	0.232157	0.193982	0.196338	0.152065	0.151597	0.120672	0.121945
			103	0.492132	0.487916	0.462448	0.461198	0.378065	0.377632	0.314374	0.312713		103	0.0696347	0.0718771	0.0525421	0.0549042	0.031285	0.0313919	0.0186988	0.0198676		103	0.230037	0.232216	0.19347	0.196383	0.151761	0.151626	0.120711	0.121962
			103.2	0.491959	0.487982	0.462651	0.461244	0.378114	0.377791	0.314298	0.312956		103.2	0.069973	0.071909	0.0527091	0.0549329	0.0311336	0.0314033	0.0186995	0.0198733		103.2	0.229931	0.232275	0.193152	0.196429	0.150851	0.151655	0.120237	0.121978
			103.4	0.492242	0.488047	0.462665	0.46129	0.378406	0.377949	0.314639	0.313198		103.4	0.0698157	0.0719408	0.0529512	0.0549615	0.0303508	0.0314147	0.0186168	0.019879		103.4	0.229753	0.232334	0.192659	0.196474	0.15038	0.151685	0.119936	0.121994
			103.6	0.492332	0.488113	0.462658	0.461336	0.378702	0.378106	0.314777	0.31344		103.6	0.0695895	0.0719725	0.0524889	0.05499	0.0303001	0.0314262	0.0185317	0.0198847		103.6	0.229573	0.232393	0.192526	0.19652	0.150074	0.151714	0.120261	0.12201
			103.8	0.492175	0.488178	0.46265	0.461382	0.378668	0.378263	0.315092	0.313681		103.8	0.0690611	0.0720042	0.0519335	0.0550185	0.0300748	0.0314376	0.0182789	0.0198904		103.8	0.229581	0.232452	0.192551	0.196565	0.150103	0.151743	0.120172	0.122027
			104	0.492412	0.488244	0.4628	0.461428	0.378883	0.378419	0.315389	0.313921		104	0.0690768	0.0720358	0.0517492	0.0550469	0.0297054	0.031449	0.0181209	0.0198961		104	0.229618	0.232511	0.193212	0.196611	0.150836	0.151772	0.12064	0.122042
			104.2	0.492177	0.488309	0.462837	0.461474	0.379116	0.378574	0.315525	0.31416		104.2	0.0690369	0.0720673	0.0516467	0.0550753	0.0294163	0.0314603	0.0179906	0.0199018		104.2	0.230022	0.232569	0.193563	0.196656	0.151645	0.151801	0.121132	0.122058
			104.4	0.492364	0.488375	0.463057	0.46152	0.379451	0.378729	0.315676	0.314399		104.4	0.0693849	0.0720988	0.0516882	0.0551036	0.0293654	0.0314717	0.0180452	0.0199075		104.4	0.230103	0.232627	0.194258	0.196701	0.152276	0.15183	0.121706	0.122074
			104.6	0.492326	0.48844	0.463049	0.461566	0.379606	0.378883	0.315495	0.314637		104.6	0.0693047	0.0721301	0.0519158	0.0551318	0.029507	0.0314831	0.0176076	0.0199132		104.6	0.230461	0.232686	0.194655	0.196746	0.152827	0.151859	0.122166	0.12209
			104.8	0.492565	0.488506	0.463039	0.461612	0.379951	0.379036	0.31581	0.314874		104.8	0.0697393	0.0721615	0.0523447	0.05516	0.0298111	0.0314944	0.0177591	0.0199189		104.8	0.231243	0.232744	0.195373	0.196791	0.153517	0.151888	0.123044	0.122105
			105	0.492482	0.488571	0.462622	0.461657	0.379704	0.379189	0.315691	0.315111		105	0.0699145	0.0721927	0.0524441	0.0551881	0.0305483	0.0315058	0.0178419	0.0199245		105	0.23177	0.232802	0.19574	0.196836	0.15401	0.151917	0.123364	0.122121
			105.2	0.492882	0.488636	0.463667	0.461703	0.38066	0.379341	0.316315	0.315347		105.2	0.0702075	0.0722239	0.0529072	0.0552162	0.0311271	0.0315171	0.0183647	0.0199302		105.2	0.232083	0.23286	0.196407	0.196881	0.154396	0.151945	0.12348	0.122136
			105.4	0.492847	0.488701	0.463758	0.461749	0.380813	0.379492	0.316556	0.315582		105.4	0.069513	0.072255	0.0533777	0.0552442	0.0314087	0.0315284	0.0185891	0.0199359		105.4	0.232387	0.232918	0.19655	0.196926	0.154813	0.151974	0.12328	0.122151
			105.6	0.492899	0.488767	0.463771	0.461795	0.38115	0.379643	0.316989	0.315817		105.6	0.0694448	0.072286	0.0535444	0.0552721	0.0317101	0.0315397	0.0184288	0.0199416		105.6	0.232903	0.232975	0.196856	0.19697	0.154992	0.152003	0.123551	0.122166
			105.8	0.493232	0.488832	0.464004	0.461841	0.381688	0.379793	0.317518	0.31605		105.8	0.0698896	0.072317	0.0537377	0.0553	0.0323355	0.031551	0.018411	0.0199473		105.8	0.233086	0.233033	0.196639	0.197015	0.15482	0.152032	0.123064	0.122181
			106	0.493626	0.488897	0.464468	0.461886	0.382138	0.379943	0.318222	0.316283		106	0.0704514	0.0723479	0.0541175	0.0553278	0.0323729	0.0315623	0.0190194	0.0199529		106	0.232882	0.23309	0.197045	0.197059	0.155143	0.15206	0.122709	0.122196
			106.2	0.493754	0.488962	0.464594	0.461932	0.382128	0.380092	0.318484	0.316516		106.2	0.070123	0.0723788	0.0539755	0.0553556	0.0318637	0.0315736	0.018607	0.0199586		106.2	0.232984	0.233148	0.197028	0.197104	0.155107	0.152089	0.122355	0.122211
			106.4	0.494217	0.489027	0.464039	0.461978	0.382088	0.38024	0.318834	0.316747		106.4	0.0703432	0.0724096	0.0539603	0.0553833	0.0319471	0.0315849	0.0188104	0.0199643		106.4	0.232668	0.233205	0.197379	0.197148	0.154776	0.152117	0.122234	0.122225
			106.6	0.494333	0.489092	0.4637	0.462023	0.382402	0.380387	0.318878	0.316978		106.6	0.0706759	0.0724403	0.0535824	0.0554109	0.0318022	0.0315961	0.0191157	0.0199699		106.6	0.232809	0.233262	0.197102	0.197192	0.154574	0.152146	0.122377	0.12224
			106.8	0.494004	0.489157	0.462918	0.462069	0.381633	0.380534	0.318678	0.317209		106.8	0.0715626	0.072471	0.0538376	0.0554385	0.0318066	0.0316074	0.0198616	0.0199756		106.8	0.232767	0.233319	0.196699	0.197237	0.153748	0.152174	0.122275	0.122254
			107	0.493647	0.489222	0.46282	0.462115	0.381133	0.380681	0.318628	0.317438		107	0.0719912	0.0725015	0.0542241	0.055466	0.0317806	0.0316186	0.0203317	0.0199813		107	0.233037	0.233376	0.197303	0.197281	0.153422	0.152202	0.121641	0.122269
			107.2	0.493603	0.489287	0.462368	0.46216	0.380959	0.380826	0.318497	0.317667		107.2	0.0721012	0.0725321	0.0540771	0.0554935	0.0318116	0.0316298	0.020646	0.0199869		107.2	0.232906	0.233433	0.197585	0.197325	0.152768	0.152231	0.121328	0.122283
			107.4	0.493369	0.489352	0.461853	0.462206	0.380627	0.380971	0.318514	0.317896		107.4	0.072206	0.0725625	0.0542771	0.055521	0.0318645	0.0316411	0.0212001	0.0199926		107.4	0.232877	0.23349	0.197671	0.197369	0.152943	0.152259	0.121461	0.122297
			107.6	0.492609	0.489417	0.461529	0.462251	0.37982	0.381116	0.317869	0.318123		107.6	0.0722398	0.0725929	0.0534312	0.0555483	0.031692	0.0316523	0.0209643	0.0199982		107.6	0.232717	0.233546	0.197717	0.197413	0.152793	0.152287	0.121434	0.122311
			107.8	0.492048	0.489482	0.461323	0.462297	0.379462	0.38126	0.318258	0.31835		107.8	0.0726279	0.0726233	0.0538138	0.0555756	0.0318183	0.0316635	0.0212645	0.0200039		107.8	0.232926	0.233603	0.198037	0.197456	0.152731	0.152315	0.121109	0.122325
			108	0.492101	0.489547	0.460938	0.462342	0.379434	0.381403	0.318577	0.318576		108	0.0726959	0.0726536	0.053964	0.0556029	0.0313434	0.0316747	0.0213332	0.0200095		108	0.232969	0.233659	0.198074	0.1975	0.153217	0.152343	0.121345	0.122339
			108.2	0.491801	0.489611	0.460705	0.462388	0.37884	0.381545	0.318367	0.318802		108.2	0.0731245	0.0726838	0.0545734	0.0556301	0.0310381	0.0316859	0.0213197	0.0200152		108.2	0.233247	0.233715	0.197799	0.197544	0.153859	0.152371	0.121636	0.122353
			108.4	0.492106	0.489676	0.460949	0.462433	0.379134	0.381687	0.318414	0.319027		108.4	0.0732547	0.0727139	0.0546077	0.0556573	0.0309161	0.031697	0.0214832	0.0200208		108.4	0.233552	0.233771	0.19771	0.197587	0.154263	0.152399	0.121587	0.122367
			108.6	0.492393	0.489741	0.461235	0.462479	0.379616	0.381829	0.318724	0.319251		108.6	0.0726357	0.072744	0.0547567	0.0556844	0.0305932	0.0317082	0.0207868	0.0200265		108.6	0.233806	0.233827	0.197438	0.197631	0.154635	0.152427	0.121385	0.12238
			108.8	0.492463	0.489806	0.461244	0.462524	0.380208	0.38197	0.319152	0.319474		108.8	0.072541	0.0727741	0.0549973	0.0557114	0.0305101	0.0317194	0.0206762	0.0200321		108.8	0.23418	0.233883	0.197443	0.197675	0.154991	0.152455	0.121597	0.122394
			109	0.492664	0.48987	0.461809	0.462569	0.380785	0.38211	0.319712	0.319697		109	0.0722185	0.0728041	0.0551111	0.0557384	0.0305808	0.0317305	0.0203072	0.0200378		109	0.234377	0.233939	0.197354	0.197718	0.15521	0.152483	0.121389	0.122407
			109.2	0.492878	0.489935	0.462525	0.462615	0.381538	0.38225	0.32019	0.319919		109.2	0.0717451	0.072834	0.055314	0.0557653	0.0308032	0.0317416	0.0202332	0.0200434		109.2	0.233985	0.233995	0.197099	0.197761	0.154621	0.152511	0.121253	0.122421
			109.4	0.492667	0.49	0.462615	0.46266	0.38154	0.382389	0.320666	0.320141		109.4	0.0714421	0.0728638	0.0555639	0.0557922	0.030583	0.0317528	0.0201719	0.0200491		109.4	0.233686	0.234051	0.196759	0.197805	0.15422	0.152539	0.12146	0.122434
			109.6	0.492826	0.490064	0.463096	0.462705	0.381698	0.382527	0.321107	0.320362		109.6	0.0715844	0.0728937	0.0554006	0.0558191	0.0308045	0.0317639	0.0197363	0.0200547		109.6	0.234163	0.234106	0.197117	0.197848	0.154381	0.152566	0.122116	0.122447
			109.8	0.493733	0.490129	0.463729	0.46275	0.382273	0.382665	0.321747	0.320582		109.8	0.0717766	0.0729234	0.0552071	0.0558458	0.0306583	0.031775	0.019573	0.0200603		109.8	0.234022	0.234162	0.196848	0.197891	0.154279	0.152594	0.121826	0.12246
			110	0.493522	0.490193	0.463875	0.462796	0.382361	0.382802	0.322131	0.320802		110	0.0713825	0.0729531	0.0551447	0.0558726	0.0304235	0.0317861	0.01935	0.020066		110	0.233632	0.234217	0.197241	0.197934	0.15439	0.152622	0.121674	0.122473
			110.2	0.493716	0.490258	0.463907	0.462841	0.382675	0.382939	0.322241	0.321021		110.2	0.0715724	0.0729827	0.0552633	0.0558993	0.0306522	0.0317972	0.019215	0.0200716		110.2	0.233492	0.234272	0.196404	0.197977	0.153633	0.152649	0.121663	0.122486
			110.4	0.494302	0.490322	0.464006	0.462886	0.382934	0.383075	0.322744	0.321239		110.4	0.0720229	0.0730123	0.0552332	0.0559259	0.030946	0.0318083	0.0195608	0.0200772		110.4	0.233464	0.234328	0.197246	0.19802	0.153515	0.152677	0.122239	0.122499
			110.6	0.494339	0.490387	0.464247	0.462931	0.383019	0.383211	0.322998	0.321457		110.6	0.0721432	0.0730418	0.0547343	0.0559525	0.0307289	0.0318194	0.0192962	0.0200829		110.6	0.234318	0.234383	0.197486	0.198063	0.153466	0.152704	0.122845	0.122511
			110.8	0.494224	0.490451	0.464351	0.462976	0.382917	0.383346	0.323317	0.321674		110.8	0.0724133	0.0730713	0.0550744	0.055979	0.0311629	0.0318305	0.0195704	0.0200885		110.8	0.234313	0.234438	0.197905	0.198106	0.153279	0.152732	0.123056	0.122524
			111	0.494239	0.490515	0.464791	0.463022	0.383097	0.383481	0.323771	0.32189		111	0.072213	0.0731007	0.0547768	0.0560055	0.0313241	0.0318415	0.0196422	0.0200941		111	0.234858	0.234493	0.198161	0.198148	0.153659	0.152759	0.123137	0.122537
			111.2	0.494428	0.49058	0.46443	0.463067	0.382923	0.383615	0.324065	0.322106		111.2	0.0726399	0.07313	0.0541893	0.0560319	0.0320121	0.0318526	0.0198783	0.0200998		111.2	0.235137	0.234547	0.197846	0.198191	0.153835	0.152787	0.12336	0.122549
			111.4	0.494216	0.490644	0.464866	0.463112	0.383035	0.383748	0.324673	0.322321		111.4	0.0730978	0.0731593	0.0543923	0.0560583	0.0322184	0.0318636	0.0202918	0.0201054		111.4	0.235506	0.234602	0.198476	0.198234	0.15412	0.152814	0.123885	0.122561
			111.6	0.494159	0.490708	0.465128	0.463157	0.382894	0.383881	0.324653	0.322535		111.6	0.0733097	0.0731886	0.0541525	0.0560846	0.0322867	0.0318747	0.020538	0.020111		111.6	0.235171	0.234657	0.198842	0.198276	0.154201	0.152841	0.123839	0.122574
			111.8	0.494298	0.490772	0.465013	0.463202	0.382785	0.384013	0.324995	0.322749		111.8	0.0735813	0.0732178	0.0545395	0.0561109	0.0330201	0.0318857	0.0210805	0.0201166		111.8	0.235599	0.234711	0.19968	0.198319	0.154221	0.152868	0.124082	0.122586
			112	0.494688	0.490836	0.465306	0.463247	0.382763	0.384145	0.325393	0.322962		112	0.0737045	0.0732469	0.0548716	0.0561372	0.0332001	0.0318968	0.0216352	0.0201223		112	0.235796	0.234766	0.199921	0.198361	0.154785	0.152896	0.124378	0.122598
			112.2	0.494638	0.490901	0.465644	0.463292	0.382648	0.384276	0.325446	0.323175		112.2	0.0738306	0.073276	0.0552098	0.0561634	0.0333817	0.0319078	0.021592	0.0201279		112.2	0.23602	0.23482	0.200786	0.198403	0.155232	0.152923	0.12459	0.12261
			112.4	0.495136	0.490965	0.466163	0.463337	0.383569	0.384407	0.325984	0.323387		112.4	0.0735177	0.073305	0.0550696	0.0561895	0.0332591	0.0319188	0.0216105	0.0201335		112.4	0.236659	0.234874	0.201231	0.198446	0.155373	0.15295	0.124301	0.122622
			112.6	0.495472	0.491029	0.466468	0.463382	0.384098	0.384537	0.326652	0.323598		112.6	0.0732613	0.073334	0.0553261	0.0562156	0.0329627	0.0319298	0.0212271	0.0201391		112.6	0.236664	0.234928	0.201634	0.198488	0.156186	0.152977	0.124116	0.122634
			112.8	0.495687	0.491093	0.466685	0.463427	0.384223	0.384666	0.327083	0.323809		112.8	0.0732473	0.0733629	0.0554224	0.0562417	0.0325337	0.0319408	0.0210867	0.0201447		112.8	0.236966	0.234982	0.201991	0.19853	0.156642	0.153004	0.12441	0.122646
			113	0.495812	0.491157	0.467184	0.463472	0.384574	0.384795	0.327493	0.324019		113	0.073159	0.0733918	0.0553811	0.0562677	0.0325881	0.0319518	0.0214303	0.0201503		113	0.237016	0.235036	0.202472	0.198572	0.156794	0.153031	0.124621	0.122657
			113.2	0.49564	0.491221	0.467076	0.463517	0.384812	0.384924	0.327636	0.324228		113.2	0.0732531	0.0734206	0.0557551	0.0562936	0.0331227	0.0319628	0.0218375	0.020156		113.2	0.236564	0.23509	0.202347	0.198614	0.156788	0.153058	0.124899	0.122669
			113.4	0.495681	0.491285	0.467117	0.463562	0.385385	0.385052	0.328278	0.324437		113.4	0.0732613	0.0734494	0.0560447	0.0563195	0.0329129	0.0319737	0.022191	0.0201616		113.4	0.23656	0.235144	0.202968	0.198656	0.157216	0.153085	0.12506	0.12268
			113.6	0.496099	0.491349	0.467306	0.463606	0.385511	0.385179	0.32861	0.324645		113.6	0.0733439	0.0734781	0.056034	0.0563454	0.0329775	0.0319847	0.0216074	0.0201672		113.6	0.236753	0.235198	0.202743	0.198698	0.157736	0.153112	0.12501	0.122692
			113.8	0.496719	0.491413	0.467461	0.463651	0.385956	0.385306	0.329209	0.324853		113.8	0.0734196	0.0735068	0.0562016	0.0563712	0.0327609	0.0319957	0.0214019	0.0201728		113.8	0.23675	0.235251	0.202893	0.19874	0.158177	0.153139	0.125096	0.122703
			114	0.496707	0.491477	0.46773	0.463696	0.386211	0.385433	0.328888	0.32506		114	0.0736008	0.0735354	0.0565723	0.056397	0.0327519	0.0320066	0.0214409	0.0201784		114	0.236662	0.235305	0.203112	0.198782	0.158052	0.153165	0.125093	0.122715
			114.2	0.496999	0.49154	0.467698	0.463741	0.386519	0.385559	0.32862	0.325266		114.2	0.0736202	0.073564	0.0562839	0.0564227	0.0327197	0.0320176	0.0215408	0.020184		114.2	0.236327	0.235358	0.202281	0.198823	0.157358	0.153192	0.125027	0.122726
			114.4	0.496987	0.491604	0.467008	0.463786	0.386145	0.385684	0.328705	0.325472		114.4	0.0733345	0.0735925	0.056072	0.0564484	0.0322707	0.0320285	0.0212131	0.0201896		114.4	0.236953	0.235412	0.20271	0.198865	0.157849	0.153219	0.125828	0.122737
			114.6	0.497406	0.491668	0.467024	0.46383	0.386717	0.385809	0.32894	0.325677		114.6	0.0731404	0.073621	0.055626	0.056474	0.0323348	0.0320394	0.0209024	0.0201952		114.6	0.237663	0.235465	0.20286	0.198907	0.158431	0.153245	0.126136	0.122748
			114.8	0.497751	0.491732	0.467146	0.463875	0.387148	0.385933	0.329105	0.325881		114.8	0.0731293	0.0736494	0.0554035	0.0564996	0.032107	0.0320504	0.020746	0.0202008		114.8	0.237827	0.235518	0.202563	0.198948	0.158196	0.153272	0.12633	0.122759
			115	0.498015	0.491795	0.466769	0.46392	0.387213	0.386057	0.329051	0.326085		115	0.072977	0.0736778	0.0549118	0.0565252	0.0319784	0.0320613	0.0208601	0.0202064		115	0.238163	0.235571	0.201628	0.19899	0.157802	0.153299	0.126179	0.12277
			115.2	0.498219	0.491859	0.466521	0.463965	0.387419	0.386181	0.329298	0.326289		115.2	0.073303	0.0737061	0.0544285	0.0565507	0.0319237	0.0320722	0.0207042	0.020212		115.2	0.237878	0.235624	0.200964	0.199031	0.157221	0.153325	0.125898	0.122781
			115.4	0.497866	0.491923	0.466254	0.464009	0.387318	0.386304	0.329121	0.326491		115.4	0.073106	0.0737344	0.0539726	0.0565762	0.031891	0.0320831	0.0207868	0.0202176		115.4	0.237686	0.235677	0.201447	0.199073	0.15715	0.153352	0.126226	0.122792
			115.6	0.497678	0.491986	0.465705	0.464054	0.386453	0.386426	0.328409	0.326694		115.6	0.0730596	0.0737626	0.0537745	0.0566016	0.0320661	0.032094	0.0207234	0.0202232		115.6	0.237519	0.23573	0.201254	0.199114	0.156794	0.153378	0.126144	0.122802
			115.8	0.497745	0.49205	0.46559	0.464099	0.386061	0.386548	0.328296	0.326895		115.8	0.073455	0.0737908	0.0538547	0.056627	0.0327184	0.0321049	0.0204916	0.0202288		115.8	0.237426	0.235783	0.200945	0.199155	0.156021	0.153405	0.125614	0.122813
			116	0.497613	0.492113	0.46594	0.464143	0.385641	0.386669	0.328774	0.327096		116	0.0736279	0.0738189	0.0540296	0.0566523	0.0324544	0.0321158	0.020771	0.0202344		116	0.237359	0.235836	0.200471	0.199196	0.155613	0.153431	0.125084	0.122823
			116.2	0.497556	0.492177	0.466043	0.464188	0.385708	0.38679	0.328693	0.327296		116.2	0.0736001	0.073847	0.0537165	0.0566776	0.032675	0.0321267	0.0205734	0.02024		116.2	0.237287	0.235888	0.200649	0.199238	0.155734	0.153457	0.124832	0.122834
			116.4	0.497768	0.49224	0.465869	0.464232	0.385589	0.386911	0.328757	0.327496		116.4	0.0740105	0.073875	0.0537036	0.0567029	0.0327224	0.0321376	0.0206838	0.0202456		116.4	0.237662	0.235941	0.20032	0.199279	0.155998	0.153484	0.124443	0.122844
			116.6	0.497703	0.492304	0.465559	0.464277	0.385245	0.387031	0.3291	0.327695		116.6	0.0741289	0.073903	0.053958	0.0567281	0.0326672	0.0321484	0.0208106	0.0202512		116.6	0.23765	0.235993	0.200467	0.19932	0.156635	0.15351	0.124368	0.122855
			116.8	0.497589	0.492367	0.465837	0.464321	0.385476	0.38715	0.329365	0.327894		116.8	0.0739284	0.073931	0.0539915	0.0567533	0.0327412	0.0321593	0.020501	0.0202568		116.8	0.237913	0.236046	0.200819	0.199361	0.156634	0.153536	0.124679	0.122865
			117	0.49712	0.492431	0.465768	0.464366	0.385899	0.387269	0.32936	0.328092		117	0.0743348	0.0739589	0.0545235	0.0567784	0.0334024	0.0321701	0.020868	0.0202624		117	0.2375	0.236098	0.200868	0.199402	0.156195	0.153562	0.124399	0.122875
			117.2	0.496894	0.492494	0.465646	0.464411	0.386239	0.387388	0.329516	0.328289		117.2	0.0745534	0.0739868	0.0551795	0.0568035	0.0340148	0.032181	0.0211503	0.020268		117.2	0.237303	0.23615	0.200595	0.199443	0.156275	0.153588	0.124334	0.122885
			117.4	0.49671	0.492557	0.465682	0.464455	0.386367	0.387506	0.329981	0.328486		117.4	0.0747112	0.0740146	0.0550709	0.0568286	0.0335023	0.0321918	0.0211363	0.0202736		117.4	0.237297	0.236202	0.200805	0.199483	0.15623	0.153615	0.123834	0.122895
			117.6	0.497004	0.492621	0.46588	0.464499	0.386561	0.387623	0.330384	0.328683		117.6	0.0746142	0.0740423	0.0553178	0.0568536	0.0330704	0.0322027	0.0201649	0.0202791		117.6	0.237683	0.236255	0.200091	0.199524	0.156514	0.153641	0.12371	0.122905
			117.8	0.496863	0.492684	0.466295	0.464544	0.386954	0.38774	0.330202	0.328878		117.8	0.0745399	0.0740701	0.0557664	0.0568785	0.0330823	0.0322135	0.0204799	0.0202847		117.8	0.237668	0.236307	0.200229	0.199565	0.156281	0.153667	0.123827	0.122915
			118	0.496723	0.492747	0.466472	0.464588	0.387058	0.387857	0.329932	0.329073		118	0.0745249	0.0740977	0.0560885	0.0569035	0.0326518	0.0322243	0.0206544	0.0202903		118	0.237662	0.236358	0.200375	0.199606	0.155575	0.153693	0.123774	0.122925
			118.2	0.496893	0.49281	0.466623	0.464633	0.387356	0.387973	0.330394	0.329268		118.2	0.0740544	0.0741254	0.0560659	0.0569284	0.0327801	0.0322351	0.0207353	0.0202959		118.2	0.237959	0.23641	0.20048	0.199646	0.155404	0.153719	0.123831	0.122935
			118.4	0.497629	0.492873	0.46661	0.464677	0.387883	0.388089	0.331133	0.329462		118.4	0.0742549	0.074153	0.0566362	0.0569532	0.0326295	0.032246	0.0208155	0.0203015		118.4	0.238475	0.236462	0.20118	0.199687	0.155844	0.153745	0.124341	0.122945
			118.6	0.498329	0.492937	0.46697	0.464722	0.388883	0.388204	0.331802	0.329655		118.6	0.0738036	0.0741805	0.0564807	0.056978	0.0325244	0.0322568	0.020287	0.0203071		118.6	0.238364	0.236514	0.201492	0.199727	0.155478	0.15377	0.124558	0.122954
			118.8	0.498414	0.493	0.467111	0.464766	0.389076	0.388319	0.331596	0.329848		118.8	0.0738176	0.074208	0.0565648	0.0570028	0.0321599	0.0322676	0.0200453	0.0203127		118.8	0.238424	0.236565	0.201425	0.199768	0.155058	0.153796	0.124931	0.122964
			119	0.498393	0.493063	0.466658	0.46481	0.388727	0.388433	0.331765	0.33004		119	0.0737275	0.0742355	0.0566362	0.0570276	0.0318332	0.0322784	0.0198837	0.0203182		119	0.23875	0.236617	0.201918	0.199808	0.155422	0.153822	0.124947	0.122973
			119.2	0.498284	0.493126	0.466581	0.464855	0.388806	0.388547	0.33201	0.330232		119.2	0.0732652	0.0742629	0.0560358	0.0570523	0.0309318	0.0322892	0.0193959	0.0203238		119.2	0.238975	0.236668	0.202534	0.199849	0.155634	0.153848	0.125221	0.122983
			119.4	0.498296	0.493189	0.466582	0.464899	0.388747	0.388661	0.33205	0.330423		119.4	0.0735693	0.0742903	0.0564003	0.0570769	0.0310323	0.0322999	0.0194724	0.0203294		119.4	0.23893	0.23672	0.202838	0.199889	0.155622	0.153874	0.125187	0.122992
			119.6	0.498547	0.493252	0.46671	0.464943	0.388671	0.388774	0.332033	0.330614		119.6	0.0739012	0.0743176	0.0565123	0.0571015	0.0307253	0.0323107	0.0190221	0.020335		119.6	0.238895	0.236771	0.202451	0.199929	0.155332	0.153899	0.124848	0.123001
			119.8	0.498718	0.493315	0.467063	0.464987	0.389	0.388886	0.332513	0.330804		119.8	0.0741524	0.0743449	0.0563614	0.0571261	0.0307874	0.0323215	0.0188461	0.0203405		119.8	0.238457	0.236822	0.201995	0.199969	0.154762	0.153925	0.124221	0.123011
			120	0.498364	0.493378	0.467393	0.465032	0.388843	0.388998	0.332902	0.330993		120	0.0741971	0.0743722	0.0559938	0.0571507	0.0304611	0.0323323	0.0190851	0.0203461		120	0.238709	0.236874	0.20206	0.20001	0.1547	0.153951	0.124074	0.12302
			120.2	0.498631	0.49344	0.467572	0.465076	0.389164	0.38911	0.333261	0.331182		120.2	0.0742295	0.0743994	0.0557027	0.0571752	0.030918	0.032343	0.0190162	0.0203517		120.2	0.238815	0.236925	0.202118	0.20005	0.155151	0.153976	0.123903	0.123029
			120.4	0.498528	0.493503	0.466686	0.46512	0.388802	0.389221	0.333452	0.331371		120.4	0.074305	0.0744266	0.0557627	0.0571997	0.0308879	0.0323538	0.0188244	0.0203573		120.4	0.238963	0.236976	0.201977	0.20009	0.155123	0.154002	0.123875	0.123038
			120.6	0.498132	0.493566	0.466744	0.465164	0.388772	0.389332	0.333716	0.331559		120.6	0.0745871	0.0744537	0.0556415	0.0572241	0.0311534	0.0323645	0.0189245	0.0203628		120.6	0.238386	0.237027	0.201579	0.20013	0.154989	0.154027	0.123696	0.123047
			120.8	0.49809	0.493629	0.466901	0.465208	0.389038	0.389442	0.334266	0.331746		120.8	0.0748284	0.0744808	0.0561643	0.0572485	0.0320285	0.0323753	0.0190093	0.0203684		120.8	0.238313	0.237078	0.201484	0.20017	0.154909	0.154053	0.123413	0.123056
			121	0.498134	0.493692	0.467087	0.465253	0.389763	0.389552	0.334946	0.331933		121	0.0750362	0.0745079	0.0564186	0.0572729	0.0324329	0.032386	0.019378	0.020374		121	0.238409	0.237129	0.201231	0.20021	0.155015	0.154078	0.123317	0.123065
			121.2	0.498218	0.493754	0.467018	0.465297	0.389325	0.389662	0.335451	0.332119		121.2	0.0746711	0.0745349	0.0564548	0.0572972	0.0322156	0.0323968	0.0194833	0.0203796		121.2	0.238908	0.237179	0.200848	0.20025	0.155285	0.154104	0.123355	0.123074
			121.4	0.498529	0.493817	0.467192	0.465341	0.389153	0.389771	0.335805	0.332304		121.4	0.0744294	0.0745618	0.0559207	0.0573215	0.0318282	0.0324075	0.0194275	0.0203851		121.4	0.239107	0.23723	0.200953	0.200289	0.155213	0.154129	0.123183	0.123083
			121.6	0.498814	0.49388	0.467308	0.465385	0.389584	0.38988	0.335943	0.33249		121.6	0.0737901	0.0745888	0.0557794	0.0573458	0.0315233	0.0324182	0.0187313	0.0203907		121.6	0.239734	0.237281	0.200793	0.200329	0.155382	0.154154	0.123289	0.123091
			121.8	0.498729	0.493942	0.467547	0.465429	0.389561	0.389988	0.336092	0.332674		121.8	0.0736113	0.0746157	0.0560764	0.05737	0.0317828	0.0324289	0.0194403	0.0203963		121.8	0.239669	0.237331	0.201125	0.200369	0.155684	0.15418	0.123671	0.1231
			122	0.499008	0.494005	0.468088	0.465473	0.390025	0.390096	0.336811	0.332858		122	0.0739081	0.0746425	0.0567638	0.0573942	0.0320352	0.0324396	0.0197943	0.0204018		122	0.239821	0.237382	0.201034	0.200409	0.155749	0.154205	0.123586	0.123109
			122.2	0.49966	0.494067	0.468267	0.465517	0.390105	0.390203	0.337136	0.333042		122.2	0.073693	0.0746693	0.0567829	0.0574183	0.0323202	0.0324504	0.0199853	0.0204074		122.2	0.240074	0.237432	0.200936	0.200448	0.155918	0.15423	0.123603	0.123117
			122.4	0.500213	0.49413	0.468346	0.465561	0.390447	0.39031	0.337521	0.333225		122.4	0.0736212	0.0746961	0.0568824	0.0574424	0.0323078	0.0324611	0.0203497	0.020413		122.4	0.240193	0.237483	0.201494	0.200488	0.156578	0.154256	0.124367	0.123126
			122.6	0.499969	0.494192	0.468101	0.465605	0.390459	0.390417	0.337246	0.333407		122.6	0.0730738	0.0747229	0.0569497	0.0574665	0.0324137	0.0324718	0.0203791	0.0204185		122.6	0.240262	0.237533	0.202027	0.200527	0.156371	0.154281	0.124643	0.123134
			122.8	0.499861	0.494255	0.46828	0.465649	0.390354	0.390523	0.336858	0.333589		122.8	0.0734448	0.0747496	0.0570998	0.0574906	0.0323165	0.0324825	0.0205688	0.0204241		122.8	0.240609	0.237583	0.202312	0.200567	0.156899	0.154306	0.124693	0.123142
			123	0.499772	0.494317	0.46835	0.465693	0.389912	0.390629	0.33693	0.33377		123	0.0730855	0.0747762	0.0571031	0.0575146	0.0319222	0.0324931	0.0201295	0.0204297		123	0.240631	0.237633	0.203006	0.200606	0.157233	0.154331	0.12457	0.123151
			123.2	0.500238	0.49438	0.46871	0.465737	0.390461	0.390734	0.3369	0.333951		123.2	0.0727445	0.0748029	0.056864	0.0575386	0.0313166	0.0325038	0.0198081	0.0204352		123.2	0.240266	0.237683	0.202753	0.200646	0.157109	0.154356	0.124682	0.123159
			123.4	0.499915	0.494442	0.468901	0.465781	0.390609	0.390839	0.336627	0.334132		123.4	0.0729148	0.0748295	0.0568469	0.0575625	0.0313943	0.0325145	0.0190711	0.0204408		123.4	0.240039	0.237733	0.202885	0.200685	0.1572	0.154381	0.124811	0.123167
			123.6	0.499436	0.494505	0.469057	0.465825	0.390563	0.390944	0.336437	0.334311		123.6	0.0726129	0.074856	0.0563193	0.0575865	0.0311063	0.0325252	0.0181394	0.0204463		123.6	0.240054	0.237783	0.202882	0.200724	0.157211	0.154406	0.125156	0.123175
			123.8	0.499332	0.494567	0.469518	0.465869	0.390464	0.391048	0.33667	0.334491		123.8	0.0723041	0.0748825	0.0554895	0.0576103	0.0308397	0.0325359	0.0179243	0.0204519		123.8	0.239863	0.237833	0.203184	0.200764	0.156831	0.154431	0.125062	0.123183
			124	0.499067	0.494629	0.469552	0.465913	0.390366	0.391152	0.336801	0.334669		124	0.0723343	0.074909	0.0550375	0.0576342	0.0304454	0.0325465	0.0179497	0.0204575		124	0.239914	0.237883	0.203453	0.200803	0.157178	0.154456	0.125144	0.123191
			124.2	0.498731	0.494691	0.469428	0.465957	0.390168	0.391255	0.33669	0.334848		124.2	0.072267	0.0749355	0.0550353	0.057658	0.0304029	0.0325572	0.0174077	0.020463		124.2	0.239257	0.237933	0.202805	0.200842	0.156682	0.154481	0.12521	0.123199
			124.4	0.498015	0.494754	0.468878	0.466	0.38985	0.391358	0.336208	0.335025		124.4	0.0722212	0.0749619	0.0548756	0.0576818	0.0301908	0.0325678	0.0171876	0.0204686		124.4	0.23896	0.237983	0.202594	0.200881	0.156498	0.154506	0.125366	0.123207
			124.6	0.498305	0.494816	0.468992	0.466044	0.390195	0.391461	0.336444	0.335203		124.6	0.072688	0.0749882	0.0550867	0.0577055	0.0305842	0.0325785	0.0176664	0.0204741		124.6	0.238692	0.238032	0.202056	0.20092	0.156667	0.154531	0.125163	0.123215
			124.8	0.498283	0.494878	0.468852	0.466088	0.390139	0.391563	0.336917	0.335379		124.8	0.0725527	0.0750146	0.0551195	0.0577293	0.0310023	0.0325891	0.0176614	0.0204797		124.8	0.239362	0.238082	0.202689	0.200959	0.156684	0.154555	0.125428	0.123223
			125	0.49823	0.49494	0.468763	0.466132	0.390592	0.391665	0.337078	0.335555		125	0.0725272	0.0750409	0.0548623	0.0577529	0.0309159	0.0325998	0.0175705	0.0204852		125	0.239864	0.238131	0.202814	0.200998	0.156457	0.15458	0.125797	0.12323
			125.2	0.498709	0.495002	0.468468	0.466176	0.389988	0.391766	0.336962	0.335731		125.2	0.0725155	0.0750671	0.0549465	0.0577766	0.0306538	0.0326104	0.0175719	0.0204908		125.2	0.239811	0.238181	0.20268	0.201037	0.156392	0.154605	0.125471	0.123238
			125.4	0.498887	0.495064	0.468458	0.46622	0.390039	0.391867	0.33704	0.335906		125.4	0.0729816	0.0750934	0.0551389	0.0578002	0.0311976	0.032621	0.018035	0.0204964		125.4	0.239609	0.23823	0.202556	0.201076	0.155904	0.15463	0.125101	0.123246
			125.6	0.498899	0.495126	0.468121	0.466263	0.390313	0.391968	0.337218	0.336081		125.6	0.0729816	0.0751196	0.0557486	0.0578238	0.0310212	0.0326317	0.0181438	0.0205019		125.6	0.239411	0.23828	0.202094	0.201115	0.155186	0.154654	0.124308	0.123253
			125.8	0.499252	0.495188	0.468192	0.466307	0.390446	0.392068	0.337637	0.336255		125.8	0.073673	0.0751457	0.0562692	0.0578474	0.0317068	0.0326423	0.0192024	0.0205075		125.8	0.239214	0.238329	0.201875	0.201154	0.155175	0.154679	0.123919	0.123261
			126	0.499795	0.49525	0.468757	0.466351	0.390983	0.392168	0.338501	0.336429		126	0.0739347	0.0751719	0.0566561	0.0578709	0.0324608	0.0326529	0.0197012	0.020513		126	0.238991	0.238378	0.20148	0.201193	0.154813	0.154704	0.123457	0.123268
			126.2	0.499758	0.495312	0.468355	0.466394	0.39079	0.392267	0.338638	0.336602		126.2	0.0743091	0.075198	0.0568791	0.0578944	0.032639	0.0326635	0.0204204	0.0205186		126.2	0.239522	0.238427	0.201464	0.201231	0.154926	0.154728	0.123334	0.123276
			126.4	0.499446	0.495374	0.468217	0.466438	0.390966	0.392367	0.338805	0.336774		126.4	0.07427	0.075224	0.0571766	0.0579179	0.0327531	0.0326741	0.021162	0.0205241		126.4	0.239492	0.238476	0.201375	0.20127	0.154577	0.154753	0.122938	0.123283
			126.6	0.499459	0.495436	0.468402	0.466482	0.391195	0.392465	0.338882	0.336947		126.6	0.0746661	0.07525	0.0574456	0.0579413	0.0331834	0.0326848	0.0216914	0.0205297		126.6	0.239041	0.238525	0.201514	0.201309	0.154111	0.154777	0.122484	0.123291
			126.8	0.500082	0.495498	0.469051	0.466525	0.391665	0.392564	0.339522	0.337118		126.8	0.075095	0.075276	0.0575461	0.0579647	0.0332119	0.0326954	0.0211141	0.0205352		126.8	0.239353	0.238574	0.201139	0.201347	0.154104	0.154802	0.122159	0.123298
			127	0.500363	0.49556	0.46918	0.466569	0.391763	0.392662	0.339918	0.337289		127	0.0752423	0.075302	0.0579407	0.0579881	0.0331576	0.032706	0.0211398	0.0205408		127	0.239375	0.238623	0.201648	0.201386	0.154225	0.154826	0.122319	0.123305
			127.2	0.500388	0.495621	0.469378	0.466613	0.391902	0.39276	0.340268	0.33746		127.2	0.0754474	0.0753279	0.0579298	0.0580115	0.0328498	0.0327166	0.0213241	0.0205463		127.2	0.239392	0.238672	0.201565	0.201424	0.154293	0.154851	0.122612	0.123312
			127.4	0.499837	0.495683	0.469644	0.466656	0.392005	0.392857	0.340527	0.33763		127.4	0.0756293	0.0753538	0.0577799	0.0580348	0.0330607	0.0327271	0.0212229	0.0205519		127.4	0.239825	0.238721	0.202354	0.201463	0.154531	0.154875	0.123053	0.123319
			127.6	0.500206	0.495745	0.470133	0.4667	0.392567	0.392954	0.341317	0.3378		127.6	0.0756418	0.0753797	0.0577249	0.0580581	0.0328821	0.0327377	0.0209694	0.0205574		127.6	0.239894	0.23877	0.202191	0.201501	0.154916	0.154899	0.123572	0.123326
			127.8	0.500532	0.495807	0.470326	0.466743	0.392593	0.393051	0.341261	0.337969		127.8	0.0752843	0.0754055	0.0572923	0.0580813	0.032346	0.0327483	0.0208116	0.0205629		127.8	0.239647	0.238818	0.202368	0.20154	0.154828	0.154924	0.123801	0.123334
			128	0.500156	0.495868	0.470023	0.466787	0.392593	0.393147	0.341203	0.338138		128	0.075252	0.0754313	0.0572684	0.0581046	0.0319839	0.0327589	0.0205593	0.0205685		128	0.239533	0.238867	0.202384	0.201578	0.155526	0.154948	0.124046	0.123341
			128.2	0.50038	0.49593	0.470169	0.466831	0.3928	0.393243	0.341123	0.338306		128.2	0.0759089	0.0754571	0.0576574	0.0581278	0.0325317	0.0327695	0.0206947	0.020574		128.2	0.239804	0.238916	0.202199	0.201616	0.155379	0.154972	0.12427	0.123347
			128.4	0.500915	0.495991	0.470224	0.466874	0.393001	0.393338	0.341245	0.338474		128.4	0.0760696	0.0754828	0.0575926	0.0581509	0.0324334	0.03278	0.0210606	0.0205796		128.4	0.240412	0.238964	0.202794	0.201655	0.156237	0.154996	0.124686	0.123354
			128.6	0.501337	0.496053	0.470305	0.466918	0.393221	0.393434	0.341254	0.338641		128.6	0.076825	0.0755085	0.0579203	0.0581741	0.0329204	0.0327906	0.0212205	0.0205851		128.6	0.240656	0.239012	0.202951	0.201693	0.15647	0.155021	0.124983	0.123361
			128.8	0.500871	0.496114	0.470536	0.466961	0.393132	0.393528	0.341309	0.338807		128.8	0.0765535	0.0755342	0.0576381	0.0581972	0.0327685	0.0328012	0.0208454	0.0205907		128.8	0.241016	0.239061	0.203486	0.201731	0.156022	0.155045	0.125254	0.123368
			129	0.501073	0.496176	0.470672	0.467005	0.393492	0.393623	0.341288	0.338974		129	0.0767986	0.0755598	0.058191	0.0582203	0.032921	0.0328117	0.0208516	0.0205962		129	0.241153	0.239109	0.203707	0.201769	0.155727	0.155069	0.124904	0.123375
			129.2	0.501312	0.496237	0.470534	0.467048	0.393038	0.393717	0.341069	0.33914		129.2	0.0770897	0.0755854	0.0584654	0.0582433	0.0329301	0.0328223	0.0208672	0.0206018		129.2	0.240938	0.239157	0.203119	0.201807	0.155679	0.155093	0.124576	0.123381
			129.4	0.501098	0.496299	0.470743	0.467091	0.392878	0.393811	0.341065	0.339305		129.4	0.077327	0.075611	0.0587499	0.0582664	0.0333128	0.0328328	0.0209818	0.0206073		129.4	0.240789	0.239206	0.203203	0.201845	0.155135	0.155117	0.124422	0.123388
			129.6	0.501012	0.49636	0.470537	0.467135	0.392982	0.393904	0.340846	0.33947		129.6	0.0770488	0.0756366	0.0585951	0.0582894	0.0332062	0.0328434	0.0207048	0.0206128		129.6	0.240674	0.239254	0.202588	0.201883	0.154807	0.155141	0.124241	0.123395
			129.8	0.501012	0.496422	0.470908	0.467178	0.393211	0.393997	0.341107	0.339634		129.8	0.0768558	0.0756621	0.0580738	0.0583123	0.0334514	0.0328539	0.0206053	0.0206184		129.8	0.24138	0.239302	0.203349	0.201921	0.155427	0.155165	0.124468	0.123401
			130	0.501147	0.496483	0.470993	0.467222	0.393385	0.39409	0.341675	0.339798		130	0.0763592	0.0756876	0.0579805	0.0583353	0.033252	0.0328644	0.0203274	0.0206239		130	0.241661	0.23935	0.203407	0.201959	0.156021	0.155189	0.124691	0.123408
			130.2	0.500845	0.496544	0.470557	0.467265	0.39322	0.394183	0.341382	0.339961		130.2	0.0765563	0.075713	0.0577306	0.0583582	0.0329905	0.032875	0.0203896	0.0206294		130.2	0.241913	0.239398	0.203396	0.201997	0.156171	0.155213	0.124515	0.123414
			130.4	0.501071	0.496606	0.470497	0.467308	0.393412	0.394275	0.341629	0.340124		130.4	0.0762376	0.0757384	0.0578675	0.0583811	0.0327486	0.0328855	0.0204866	0.020635		130.4	0.241987	0.239446	0.203739	0.202035	0.156281	0.155237	0.124634	0.123421
			130.6	0.501666	0.496667	0.470545	0.467352	0.393886	0.394367	0.341894	0.340287		130.6	0.0764189	0.0757638	0.0575695	0.058404	0.0327771	0.032896	0.0204094	0.0206405		130.6	0.242402	0.239494	0.204328	0.202073	0.157267	0.155261	0.125377	0.123427
			130.8	0.501604	0.496728	0.470234	0.467395	0.393843	0.394458	0.342041	0.340449		130.8	0.0763196	0.0757892	0.0575449	0.0584268	0.0325343	0.0329066	0.0197909	0.0206461		130.8	0.242747	0.239542	0.204441	0.202111	0.157618	0.155285	0.12564	0.123433
			131	0.50117	0.496789	0.469619	0.467438	0.393798	0.394549	0.341791	0.34061		131	0.0767203	0.0758145	0.0577722	0.0584496	0.0323215	0.0329171	0.0204383	0.0206516		131	0.242267	0.23959	0.204466	0.202149	0.157738	0.155309	0.125911	0.12344
			131.2	0.501292	0.496851	0.469617	0.467482	0.393904	0.39464	0.342155	0.340771		131.2	0.0767319	0.0758398	0.0577495	0.0584724	0.0322047	0.0329276	0.0203541	0.0206571		131.2	0.24203	0.239637	0.204316	0.202186	0.15818	0.155332	0.126198	0.123446
			131.4	0.501752	0.496912	0.469952	0.467525	0.394685	0.394731	0.342655	0.340932		131.4	0.0765091	0.0758651	0.0575576	0.0584952	0.0320206	0.0329381	0.0195972	0.0206627		131.4	0.241684	0.239685	0.204675	0.202224	0.158416	0.155356	0.126601	0.123452
			131.6	0.502014	0.496973	0.469923	0.467568	0.395103	0.394821	0.342866	0.341092		131.6	0.0766403	0.0758904	0.0577985	0.0585179	0.0320702	0.0329486	0.019508	0.0206682		131.6	0.241169	0.239733	0.204271	0.202262	0.158551	0.15538	0.126494	0.123458
			131.8	0.502182	0.497034	0.469579	0.467611	0.394556	0.394911	0.342592	0.341252		131.8	0.0762478	0.0759156	0.0574893	0.0585406	0.031545	0.0329591	0.0190192	0.0206737		131.8	0.241258	0.23978	0.20461	0.202299	0.158523	0.155404	0.126361	0.123465
			132	0.502256	0.497095	0.469703	0.467655	0.394516	0.395	0.342781	0.341411		132	0.0765316	0.0759408	0.0579643	0.0585633	0.0317023	0.0329696	0.0195439	0.0206793		132	0.240951	0.239828	0.204207	0.202337	0.158526	0.155427	0.125891	0.123471
			132.2	0.502617	0.497156	0.469767	0.467698	0.394433	0.395089	0.342993	0.34157		132.2	0.0770258	0.0759659	0.0581817	0.0585859	0.0321848	0.0329801	0.0200419	0.0206848		132.2	0.240911	0.239875	0.204166	0.202374	0.158089	0.155451	0.125771	0.123477
			132.4	0.502706	0.497217	0.46991	0.467741	0.394456	0.395178	0.343054	0.341728		132.4	0.0768504	0.0759911	0.0583692	0.0586086	0.0320403	0.0329906	0.0202082	0.0206903		132.4	0.240707	0.239923	0.204298	0.202412	0.157741	0.155475	0.12538	0.123483
			132.6	0.502191	0.497278	0.469847	0.467784	0.394365	0.395267	0.342921	0.341886		132.6	0.0766149	0.0760162	0.0586243	0.0586312	0.0318985	0.0330011	0.020095	0.0206959		132.6	0.240303	0.23997	0.203963	0.202449	0.157126	0.155498	0.12503	0.123489
			132.8	0.502054	0.497339	0.470029	0.467827	0.394411	0.395355	0.343215	0.342044		132.8	0.0763153	0.0760412	0.058721	0.0586537	0.0316049	0.0330116	0.0201924	0.0207014		132.8	0.240174	0.240017	0.203453	0.202487	0.156871	0.155522	0.124396	0.123495
			133	0.501788	0.4974	0.469535	0.46787	0.394254	0.395443	0.343154	0.342201		133	0.0765547	0.0760663	0.0587367	0.0586763	0.0318276	0.0330221	0.0203817	0.0207069		133	0.239984	0.240065	0.202834	0.202524	0.156553	0.155545	0.12374	0.1235
			133.2	0.502041	0.497461	0.469851	0.467914	0.39469	0.39553	0.343592	0.342357		133.2	0.0765554	0.0760913	0.0588906	0.0586988	0.0318126	0.0330325	0.0205194	0.0207125		133.2	0.240267	0.240112	0.202475	0.202561	0.156541	0.155569	0.123647	0.123506
			133.4	0.501879	0.497521	0.470307	0.467957	0.394726	0.395618	0.344037	0.342513		133.4	0.0767233	0.0761163	0.0594103	0.0587213	0.0322206	0.033043	0.0209149	0.020718		133.4	0.240172	0.240159	0.202531	0.202599	0.156229	0.155592	0.123734	0.123512
			133.6	0.501881	0.497582	0.47005	0.468	0.394823	0.395705	0.344175	0.342669		133.6	0.0767104	0.0761413	0.0590086	0.0587438	0.0317582	0.0330535	0.0208637	0.0207235		133.6	0.24056	0.240206	0.201976	0.202636	0.156073	0.155616	0.12339	0.123518
			133.8	0.502056	0.497643	0.470365	0.468043	0.394662	0.395791	0.344577	0.342824		133.8	0.076746	0.0761662	0.0592324	0.0587663	0.0320439	0.0330639	0.0210895	0.020729		133.8	0.240952	0.240253	0.202864	0.202673	0.155998	0.155639	0.123334	0.123524
			134	0.502715	0.497704	0.470174	0.468086	0.394538	0.395878	0.344915	0.342979		134	0.0766025	0.0761911	0.059114	0.0587887	0.0321884	0.0330744	0.0209792	0.0207346		134	0.240967	0.2403	0.202488	0.20271	0.1562	0.155662	0.123228	0.123529
			134.2	0.502878	0.497764	0.47014	0.468129	0.394771	0.395964	0.344863	0.343133		134.2	0.0767788	0.076216	0.0590388	0.0588111	0.0324584	0.0330849	0.0212953	0.0207401		134.2	0.241378	0.240347	0.202771	0.202748	0.15648	0.155686	0.12339	0.123535
			134.4	0.502825	0.497825	0.470371	0.468172	0.394713	0.39605	0.345263	0.343287		134.4	0.0766016	0.0762409	0.0592048	0.0588335	0.0321742	0.0330953	0.021245	0.0207456		134.4	0.242543	0.240394	0.203586	0.202785	0.157434	0.155709	0.123906	0.123541
			134.6	0.502618	0.497886	0.470306	0.468215	0.394782	0.396135	0.345076	0.343441		134.6	0.0764985	0.0762657	0.0587594	0.0588558	0.0321037	0.0331058	0.0212082	0.0207511		134.6	0.242775	0.240441	0.20371	0.202822	0.157941	0.155732	0.124212	0.123546
			134.8	0.502402	0.497946	0.470317	0.468258	0.394895	0.39622	0.345251	0.343594		134.8	0.0765251	0.0762905	0.0584338	0.0588782	0.0321991	0.0331162	0.0212023	0.0207567		134.8	0.242941	0.240488	0.204174	0.202859	0.158331	0.155756	0.12437	0.123552
			135	0.502667	0.498007	0.470236	0.468301	0.39528	0.396305	0.345187	0.343746		135	0.0766891	0.0763153	0.0584571	0.0589005	0.0320269	0.0331267	0.0212493	0.0207622		135	0.243549	0.240534	0.204838	0.202896	0.159079	0.155779	0.124772	0.123557
			135.2	0.503266	0.498067	0.470872	0.468344	0.395446	0.39639	0.345897	0.343898		135.2	0.0765737	0.07634	0.058209	0.0589228	0.0319811	0.0331371	0.020708	0.0207677		135.2	0.244329	0.240581	0.205464	0.202933	0.160184	0.155802	0.12546	0.123563
			135.4	0.503153	0.498128	0.470745	0.468387	0.395357	0.396474	0.345736	0.34405		135.4	0.0764563	0.0763648	0.0583332	0.058945	0.0320271	0.0331476	0.0202643	0.0207732		135.4	0.244618	0.240628	0.206198	0.20297	0.160459	0.155825	0.126138	0.123568
			135.6	0.503126	0.498188	0.470532	0.46843	0.395399	0.396558	0.345524	0.344201		135.6	0.0764322	0.0763895	0.0588159	0.0589673	0.0324445	0.033158	0.0206859	0.0207788		135.6	0.244674	0.240674	0.206464	0.203007	0.160644	0.155848	0.126158	0.123573
			135.8	0.503425	0.498249	0.470751	0.468473	0.395306	0.396642	0.345483	0.344352		135.8	0.0761098	0.0764141	0.0586635	0.0589895	0.0325279	0.0331685	0.0206208	0.0207843		135.8	0.244575	0.240721	0.207027	0.203044	0.160542	0.155872	0.126224	0.123579
			136	0.503812	0.498309	0.471415	0.468516	0.395782	0.396725	0.345736	0.344502		136	0.0760159	0.0764388	0.0589599	0.0590117	0.0330736	0.0331789	0.0212651	0.0207898		136	0.244646	0.240767	0.207192	0.20308	0.160488	0.155895	0.126792	0.123584
			136.2	0.503724	0.49837	0.471495	0.468559	0.395768	0.396809	0.345794	0.344652		136.2	0.0759544	0.0764634	0.0588083	0.0590338	0.0333404	0.0331893	0.0213728	0.0207953		136.2	0.244823	0.240814	0.207399	0.203117	0.160397	0.155918	0.12681	0.123589
			136.4	0.503887	0.49843	0.471605	0.468602	0.396292	0.396891	0.346064	0.344802		136.4	0.0761963	0.076488	0.059457	0.059056	0.0338341	0.0331997	0.0216228	0.0208009		136.4	0.244755	0.24086	0.20694	0.203154	0.160035	0.155941	0.126641	0.123595
			136.6	0.503571	0.49849	0.471178	0.468644	0.396377	0.396974	0.345938	0.344951		136.6	0.0756634	0.0765126	0.0595844	0.0590781	0.0338167	0.0332102	0.0215788	0.0208064		136.6	0.244544	0.240907	0.206401	0.203191	0.160191	0.155964	0.127018	0.1236
			136.8	0.503274	0.498551	0.47134	0.468687	0.396549	0.397056	0.345944	0.3451		136.8	0.075688	0.0765371	0.0597914	0.0591002	0.0341108	0.0332206	0.0215801	0.0208119		136.8	0.244056	0.240953	0.205538	0.203227	0.160439	0.155987	0.126784	0.123605
			137	0.502852	0.498611	0.471195	0.46873	0.39677	0.397138	0.346068	0.345248		137	0.0758666	0.0765617	0.0596555	0.0591223	0.0341466	0.033231	0.0216357	0.0208174		137	0.2438	0.240999	0.205244	0.203264	0.16006	0.15601	0.126614	0.12361
			137.2	0.503405	0.498671	0.472126	0.468773	0.397444	0.39722	0.346697	0.345396		137.2	0.0762305	0.0765862	0.0601379	0.0591443	0.0342836	0.0332414	0.0216575	0.0208229		137.2	0.243547	0.241046	0.205129	0.203301	0.159988	0.156033	0.126477	0.123615
			137.4	0.50285	0.498732	0.471933	0.468816	0.396836	0.397301	0.345957	0.345543		137.4	0.0768396	0.0766106	0.0604684	0.0591664	0.0343877	0.0332518	0.0217288	0.0208285		137.4	0.24278	0.241092	0.204686	0.203337	0.159158	0.156055	0.126308	0.12362
			137.6	0.503269	0.498792	0.471592	0.468858	0.396877	0.397383	0.345974	0.34569		137.6	0.0769884	0.0766351	0.0606318	0.0591884	0.0343927	0.0332622	0.021811	0.020834		137.6	0.242916	0.241138	0.204618	0.203374	0.158941	0.156078	0.126068	0.123625
			137.8	0.503364	0.498852	0.471792	0.468901	0.396666	0.397464	0.346339	0.345837		137.8	0.0770608	0.0766595	0.0609578	0.0592104	0.0347547	0.0332726	0.0218234	0.0208395		137.8	0.242804	0.241184	0.205266	0.20341	0.158621	0.156101	0.126214	0.12363
			138	0.503766	0.498912	0.471835	0.468944	0.396836	0.397544	0.346521	0.345983		138	0.077025	0.0766839	0.0608164	0.0592323	0.0347615	0.033283	0.0222195	0.020845		138	0.242946	0.24123	0.20535	0.203447	0.158834	0.156124	0.126358	0.123635
			138.2	0.5034	0.498972	0.471889	0.468987	0.396905	0.397625	0.346667	0.346129		138.2	0.0772887	0.0767083	0.0608227	0.0592543	0.0346955	0.0332934	0.0227993	0.0208505		138.2	0.243421	0.241276	0.20588	0.203483	0.15907	0.156147	0.126698	0.12364
			138.4	0.5032	0.499032	0.471912	0.469029	0.396377	0.397705	0.347148	0.346274		138.4	0.0771811	0.0767326	0.0607	0.0592762	0.0344841	0.0333038	0.022913	0.020856		138.4	0.243518	0.241322	0.206267	0.20352	0.159076	0.15617	0.126219	0.123645
			138.6	0.503055	0.499092	0.471806	0.469072	0.396569	0.397784	0.347351	0.346419		138.6	0.0773152	0.076757	0.0605441	0.0592981	0.0343131	0.0333142	0.0231432	0.0208616		138.6	0.243453	0.241368	0.206254	0.203556	0.159028	0.156192	0.126352	0.12365
			138.8	0.50322	0.499152	0.471565	0.469115	0.396663	0.397864	0.347742	0.346564		138.8	0.0774965	0.0767813	0.060535	0.05932	0.0340653	0.0333246	0.0232466	0.0208671		138.8	0.243826	0.241414	0.206954	0.203593	0.15927	0.156215	0.126103	0.123655
			139	0.503262	0.499212	0.47169	0.469158	0.396449	0.397943	0.347732	0.346708		139	0.0775596	0.0768056	0.0603755	0.0593419	0.0335134	0.033335	0.0228517	0.0208726		139	0.244189	0.241459	0.206902	0.203629	0.159531	0.156238	0.125908	0.123659
			139.2	0.503595	0.499272	0.47211	0.4692	0.396431	0.398022	0.348284	0.346852		139.2	0.0777667	0.0768298	0.0602191	0.0593637	0.0334807	0.0333454	0.0226363	0.0208781		139.2	0.244457	0.241505	0.206534	0.203665	0.159479	0.15626	0.126171	0.123664
			139.4	0.504036	0.499332	0.472188	0.469243	0.396775	0.398101	0.348475	0.346995		139.4	0.0778444	0.0768541	0.060216	0.0593855	0.0339437	0.0333558	0.0227003	0.0208836		139.4	0.244214	0.241551	0.206273	0.203702	0.158571	0.156283	0.125879	0.123669
			139.6	0.504807	0.499392	0.47298	0.469285	0.397679	0.39818	0.348843	0.347138		139.6	0.0777596	0.0768783	0.0601939	0.0594073	0.0338178	0.0333661	0.022854	0.0208891		139.6	0.244241	0.241597	0.206243	0.203738	0.157911	0.156305	0.125604	0.123674
			139.8	0.505206	0.499452	0.473332	0.469328	0.397759	0.398258	0.349176	0.347281		139.8	0.0776898	0.0769025	0.0598434	0.0594291	0.0338106	0.0333765	0.0226608	0.0208946		139.8	0.244776	0.241642	0.206404	0.203774	0.157912	0.156328	0.125811	0.123678
			140	0.505271	0.499512	0.473792	0.469371	0.397807	0.398336	0.349526	0.347423		140	0.0776164	0.0769266	0.0600946	0.0594508	0.0342499	0.0333869	0.0223207	0.0209002		140	0.245582	0.241688	0.206198	0.20381	0.157795	0.156351	0.126305	0.123683
			140.2	0.505028	0.499572	0.474047	0.469413	0.398083	0.398413	0.349796	0.347564		140.2	0.0779255	0.0769508	0.0600968	0.0594726	0.0342971	0.0333972	0.0219572	0.0209057		140.2	0.245447	0.241733	0.205425	0.203846	0.157284	0.156373	0.125918	0.123687
			140.4	0.504903	0.499631	0.47373	0.469456	0.39807	0.398491	0.349817	0.347706		140.4	0.0779676	0.0769749	0.0598551	0.0594943	0.0342061	0.0334076	0.0215856	0.0209112		140.4	0.245421	0.241779	0.20539	0.203882	0.157055	0.156396	0.125937	0.123692
			140.6	0.504512	0.499691	0.473683	0.469498	0.397838	0.398568	0.349269	0.347847		140.6	0.0772105	0.076999	0.0592301	0.059516	0.0338187	0.033418	0.0210738	0.0209167		140.6	0.245075	0.241824	0.205115	0.203918	0.156978	0.156418	0.126011	0.123697
			140.8	0.504285	0.499751	0.474126	0.469541	0.397651	0.398645	0.349342	0.347987		140.8	0.0772563	0.0770231	0.0590986	0.0595377	0.0339599	0.0334283	0.0206881	0.0209222		140.8	0.244664	0.24187	0.204895	0.203954	0.157266	0.15644	0.126085	0.123701
			141	0.504418	0.49981	0.474313	0.469583	0.39763	0.398722	0.349722	0.348127		141	0.077564	0.0770471	0.0588707	0.0595593	0.0336525	0.0334387	0.0206263	0.0209277		141	0.244669	0.241915	0.205	0.20399	0.157267	0.156463	0.126254	0.123706
			141.2	0.504706	0.49987	0.474335	0.469626	0.397887	0.398798	0.349697	0.348267		141.2	0.0781913	0.0770711	0.0591311	0.0595809	0.034262	0.0334491	0.0210128	0.0209332		141.2	0.244311	0.24196	0.204877	0.204026	0.157325	0.156485	0.125937	0.12371
			141.4	0.504281	0.49993	0.473688	0.469668	0.3976	0.398874	0.349295	0.348406		141.4	0.0785217	0.0770952	0.0595412	0.0596026	0.0343614	0.0334594	0.0213735	0.0209387		141.4	0.24446	0.242006	0.205492	0.204062	0.157472	0.156508	0.126654	0.123714
			141.6	0.504437	0.499989	0.47307	0.469711	0.397716	0.39895	0.349646	0.348545		141.6	0.0785833	0.0771191	0.0598683	0.0596241	0.0346338	0.0334698	0.021993	0.0209442		141.6	0.24474	0.242051	0.206243	0.204098	0.1579	0.15653	0.127365	0.123719
			141.8	0.504525	0.500049	0.473153	0.469753	0.39768	0.399026	0.35011	0.348684		141.8	0.0788348	0.0771431	0.0596988	0.0596457	0.0349087	0.0334801	0.0225689	0.0209498		141.8	0.244632	0.242096	0.20716	0.204134	0.157922	0.156552	0.127439	0.123723
			142	0.504495	0.500108	0.473092	0.469796	0.397713	0.399101	0.350268	0.348822		142	0.079573	0.077167	0.0601186	0.0596673	0.0358382	0.0334904	0.0234357	0.0209553		142	0.244565	0.242141	0.207084	0.20417	0.15822	0.156574	0.128019	0.123727
			142.2	0.504305	0.500168	0.473117	0.469838	0.397727	0.399177	0.350428	0.34896		142.2	0.0796982	0.077191	0.060395	0.0596888	0.0361892	0.0335008	0.0236619	0.0209608		142.2	0.244626	0.242186	0.207892	0.204206	0.158344	0.156597	0.128082	0.123732
			142.4	0.504253	0.500227	0.472972	0.469881	0.397632	0.399252	0.350529	0.349097		142.4	0.0797689	0.0772149	0.0602065	0.0597103	0.0358205	0.0335111	0.0237509	0.0209663		142.4	0.24431	0.242231	0.207934	0.204242	0.158649	0.156619	0.127596	0.123736
			142.6	0.504095	0.500287	0.472893	0.469923	0.397906	0.399326	0.350748	0.349234		142.6	0.079875	0.0772387	0.0603228	0.0597318	0.0355755	0.0335215	0.0234567	0.0209718		142.6	0.244504	0.242276	0.208336	0.204277	0.15906	0.156641	0.127859	0.12374
			142.8	0.504634	0.500346	0.472727	0.469965	0.397887	0.399401	0.350967	0.349371		142.8	0.0797735	0.0772626	0.060572	0.0597533	0.0354599	0.0335318	0.0231769	0.0209773		142.8	0.244401	0.242321	0.208175	0.204313	0.159136	0.156663	0.127251	0.123744
			143	0.505051	0.500406	0.473268	0.470008	0.398077	0.399475	0.351404	0.349507		143	0.0795523	0.0772864	0.0602405	0.0597748	0.0353407	0.0335421	0.0224411	0.0209828		143	0.244421	0.242366	0.207561	0.204349	0.159613	0.156685	0.127276	0.123749
			143.2	0.505399	0.500465	0.473148	0.47005	0.398451	0.399549	0.351793	0.349643		143.2	0.0795512	0.0773103	0.0604203	0.0597962	0.0357852	0.0335524	0.0223867	0.0209883		143.2	0.244522	0.242411	0.207468	0.204384	0.159405	0.156707	0.127617	0.123753
			143.4	0.505707	0.500524	0.472889	0.470093	0.398758	0.399623	0.35194	0.349778		143.4	0.0791842	0.077334	0.0598181	0.0598176	0.0357011	0.0335628	0.0217249	0.0209938		143.4	0.244704	0.242456	0.207783	0.20442	0.159353	0.15673	0.127483	0.123757
			143.6	0.5059	0.500584	0.47274	0.470135	0.398978	0.399696	0.351957	0.349914		143.6	0.0786602	0.0773578	0.0595742	0.059839	0.035016	0.0335731	0.0210297	0.0209993		143.6	0.245099	0.242501	0.207908	0.204456	0.159309	0.156752	0.127689	0.123761
			143.8	0.50559	0.500643	0.473001	0.470177	0.399175	0.39977	0.352194	0.350048		143.8	0.0780764	0.0773816	0.0596862	0.0598604	0.0349617	0.0335834	0.0206795	0.0210048		143.8	0.245402	0.242546	0.207805	0.204491	0.159328	0.156774	0.127692	0.123765
			144	0.505197	0.500702	0.47312	0.470219	0.399163	0.399843	0.352408	0.350183		144	0.0777321	0.0774053	0.0596389	0.0598818	0.0348151	0.0335937	0.0202093	0.0210103		144	0.245212	0.24259	0.207671	0.204527	0.159027	0.156796	0.127469	0.123769
			144.2	0.505149	0.500761	0.4731	0.470262	0.399448	0.399915	0.352494	0.350317		144.2	0.0773637	0.077429	0.0592408	0.0599031	0.0342064	0.033604	0.0199224	0.0210158		144.2	0.245054	0.242635	0.207513	0.204562	0.158977	0.156818	0.127433	0.123773
			144.4	0.50517	0.50082	0.473093	0.470304	0.399361	0.399988	0.352408	0.35045		144.4	0.0766566	0.0774527	0.0589119	0.0599244	0.0335587	0.0336144	0.0197168	0.0210213		144.4	0.245008	0.24268	0.207652	0.204598	0.158829	0.15684	0.127536	0.123777
			144.6	0.504766	0.50088	0.473083	0.470346	0.398942	0.40006	0.352437	0.350583		144.6	0.0760085	0.0774764	0.0588321	0.0599457	0.0330857	0.0336247	0.0194125	0.0210268		144.6	0.244922	0.242724	0.207593	0.204633	0.158729	0.156861	0.127617	0.123781
			144.8	0.504505	0.500939	0.473184	0.470388	0.398878	0.400132	0.352646	0.350716		144.8	0.0762458	0.0775	0.0589014	0.059967	0.0332408	0.033635	0.0197891	0.0210323		144.8	0.245392	0.242769	0.207813	0.204668	0.158968	0.156883	0.127995	0.123785
			145	0.504293	0.500998	0.472992	0.470431	0.39881	0.400204	0.352773	0.350849		145	0.076225	0.0775237	0.058654	0.0599883	0.0327628	0.0336453	0.019682	0.0210378		145	0.245598	0.242813	0.207745	0.204704	0.158701	0.156905	0.127839	0.123789
			145.2	0.504293	0.501057	0.472556	0.470473	0.398883	0.400276	0.352547	0.350981		145.2	0.0766397	0.0775473	0.059172	0.0600096	0.032966	0.0336556	0.0200051	0.0210433		145.2	0.245404	0.242858	0.20775	0.204739	0.158152	0.156927	0.127472	0.123793
			145.4	0.504369	0.501116	0.472627	0.470515	0.398956	0.400347	0.352642	0.351113		145.4	0.0767293	0.0775709	0.0593751	0.0600308	0.0325689	0.0336659	0.0202259	0.0210489		145.4	0.245372	0.242902	0.207648	0.204774	0.157913	0.156949	0.128188	0.123796
			145.6	0.504303	0.501175	0.472901	0.470557	0.399217	0.400419	0.353015	0.351244		145.6	0.0766512	0.0775944	0.0593748	0.060052	0.0325222	0.0336762	0.0204723	0.0210544		145.6	0.245354	0.242947	0.207294	0.20481	0.157503	0.156971	0.128346	0.1238
			145.8	0.504272	0.501234	0.473202	0.470599	0.398838	0.40049	0.353371	0.351375		145.8	0.0770705	0.077618	0.0599347	0.0600732	0.0328947	0.0336865	0.020645	0.0210599		145.8	0.245038	0.242991	0.206699	0.204845	0.157196	0.156992	0.128112	0.123804
			146	0.504105	0.501293	0.473718	0.470642	0.39884	0.40056	0.353955	0.351506		146	0.0772172	0.0776415	0.0608003	0.0600944	0.0331139	0.0336968	0.0206277	0.0210654		146	0.245057	0.243035	0.206401	0.20488	0.157343	0.157014	0.128624	0.123808
			146.2	0.504449	0.501352	0.473633	0.470684	0.398979	0.400631	0.354289	0.351636		146.2	0.0773952	0.077665	0.0611879	0.0601156	0.03287	0.033707	0.0205917	0.0210709		146.2	0.245508	0.24308	0.206933	0.204915	0.157385	0.157036	0.128408	0.123812
			146.4	0.504601	0.501411	0.473382	0.470726	0.398774	0.400701	0.35493	0.351766		146.4	0.077875	0.0776885	0.0611412	0.0601367	0.0326504	0.0337173	0.0206017	0.0210764		146.4	0.245955	0.243124	0.206715	0.204951	0.157497	0.157058	0.128474	0.123815
			146.6	0.504532	0.501469	0.473333	0.470768	0.398561	0.400771	0.354858	0.351895		146.6	0.0784513	0.077712	0.0615606	0.0601578	0.0331895	0.0337276	0.0208044	0.0210819		146.6	0.246147	0.243168	0.207079	0.204986	0.157597	0.157079	0.128662	0.123819
			146.8	0.505074	0.501528	0.473595	0.47081	0.398379	0.400841	0.354865	0.352025		146.8	0.0789205	0.0777354	0.0619625	0.060179	0.0336808	0.0337379	0.0206627	0.0210874		146.8	0.246347	0.243212	0.20686	0.205021	0.157773	0.157101	0.128703	0.123823
			147	0.505297	0.501587	0.473837	0.470852	0.398995	0.400911	0.355072	0.352153		147	0.0789941	0.0777589	0.0617601	0.0602001	0.0338745	0.0337482	0.0205118	0.0210929		147	0.246196	0.243256	0.207207	0.205056	0.157912	0.157123	0.128512	0.123826
			147.2	0.505287	0.501646	0.47332	0.470894	0.399197	0.40098	0.354802	0.352282		147.2	0.0795618	0.0777823	0.0617004	0.0602211	0.0342644	0.0337585	0.0207246	0.0210984		147.2	0.246426	0.2433	0.207388	0.205091	0.157998	0.157144	0.128393	0.12383
			147.4	0.505562	0.501705	0.473087	0.470936	0.399252	0.40105	0.354504	0.35241		147.4	0.0797971	0.0778057	0.0610985	0.0602422	0.03422	0.0337687	0.020422	0.0211038		147.4	0.24681	0.243344	0.20789	0.205126	0.158223	0.157166	0.12797	0.123833
			147.6	0.505555	0.501763	0.473363	0.470978	0.399284	0.401119	0.354369	0.352538		147.6	0.0798956	0.0778291	0.0610025	0.0602633	0.0347399	0.033779	0.0209376	0.0211093		147.6	0.246703	0.243388	0.20754	0.205161	0.157737	0.157187	0.127349	0.123837
			147.8	0.505299	0.501822	0.473638	0.47102	0.399679	0.401188	0.354158	0.352665		147.8	0.0800475	0.0778524	0.0614231	0.0602843	0.0352026	0.0337893	0.0214357	0.0211148		147.8	0.246418	0.243432	0.207718	0.205196	0.157984	0.157209	0.126773	0.123841
			148	0.505383	0.501881	0.473254	0.471062	0.399853	0.401256	0.354105	0.352792		148	0.0798469	0.0778758	0.0611053	0.0603053	0.0351302	0.0337995	0.021319	0.0211203		148	0.245852	0.243476	0.207879	0.205231	0.158413	0.15723	0.126423	0.123844
			148.2	0.505459	0.501939	0.47352	0.471104	0.4003	0.401325	0.354279	0.352919		148.2	0.0794783	0.0778991	0.0611021	0.0603263	0.0349865	0.0338098	0.0215372	0.0211258		148.2	0.246033	0.24352	0.207984	0.205266	0.15881	0.157252	0.126273	0.123848
			148.4	0.505388	0.501998	0.473406	0.471146	0.399954	0.401393	0.354012	0.353045		148.4	0.0792367	0.0779224	0.0606327	0.0603473	0.0347865	0.0338201	0.0216263	0.0211313		148.4	0.246043	0.243564	0.208753	0.205301	0.159131	0.157273	0.125938	0.123851
			148.6	0.505166	0.502056	0.473144	0.471188	0.399947	0.401461	0.354114	0.353171		148.6	0.0795062	0.0779457	0.0604929	0.0603682	0.0349859	0.0338303	0.0215879	0.0211368		148.6	0.246201	0.243608	0.209435	0.205335	0.159102	0.157295	0.125774	0.123854
			148.8	0.505423	0.502115	0.47359	0.47123	0.400488	0.401529	0.354078	0.353297		148.8	0.0799727	0.0779689	0.0606776	0.0603892	0.0354731	0.0338406	0.0218522	0.0211423		148.8	0.246327	0.243652	0.20951	0.20537	0.159005	0.157316	0.12508	0.123858
			149	0.505866	0.502173	0.473559	0.471272	0.400567	0.401596	0.354179	0.353422		149	0.0796373	0.0779922	0.0607381	0.0604101	0.0352613	0.0338508	0.0214459	0.0211478		149	0.24539	0.243695	0.208795	0.205405	0.158533	0.157337	0.124161	0.123861
			149.2	0.505764	0.502232	0.473156	0.471314	0.400558	0.401664	0.353933	0.353547		149.2	0.0799165	0.0780154	0.0610567	0.060431	0.0349398	0.0338611	0.0217744	0.0211533		149.2	0.244819	0.243739	0.208759	0.20544	0.158609	0.157359	0.12409	0.123865
			149.4	0.505806	0.50229	0.473407	0.471356	0.400763	0.401731	0.354023	0.353672		149.4	0.0795915	0.0780386	0.0608902	0.0604519	0.0345445	0.0338713	0.0216623	0.0211588		149.4	0.24457	0.243783	0.207872	0.205474	0.159152	0.15738	0.12447	0.123868
			149.6	0.50599	0.502349	0.473748	0.471398	0.401134	0.401798	0.354657	0.353796		149.6	0.0788922	0.0780618	0.0605015	0.0604728	0.0337334	0.0338816	0.0211514	0.0211643		149.6	0.24494	0.243826	0.207991	0.205509	0.159532	0.157401	0.124838	0.123871
			149.8	0.506114	0.502407	0.473726	0.471439	0.400735	0.401864	0.354864	0.35392		149.8	0.0789166	0.078085	0.0609786	0.0604937	0.0334815	0.0338918	0.0213345	0.0211698		149.8	0.245265	0.24387	0.207725	0.205544	0.160003	0.157422	0.125326	0.123875
			150	0.506563	0.502465	0.473679	0.471481	0.401342	0.401931	0.355691	0.354044		150	0.0786858	0.0781081	0.0612273	0.0605145	0.033304	0.0339021	0.0214394	0.0211753		150	0.24567	0.243913	0.20818	0.205578	0.160087	0.157444	0.126164	0.123878
			150.2	0.506998	0.502524	0.473246	0.471523	0.401338	0.401997	0.355715	0.354167		150.2	0.078843	0.0781313	0.0610154	0.0605354	0.0333345	0.0339123	0.0213858	0.0211808		150.2	0.246114	0.243957	0.208094	0.205613	0.159998	0.157465	0.126224	0.123881
			150.4	0.507449	0.502582	0.473696	0.471565	0.401398	0.402064	0.356207	0.35429		150.4	0.0787226	0.0781544	0.0606068	0.0605562	0.0330207	0.0339226	0.0212715	0.0211863		150.4	0.24647	0.244	0.208146	0.205648	0.159927	0.157486	0.126609	0.123884
			150.6	0.507978	0.50264	0.474355	0.471607	0.401904	0.40213	0.356195	0.354413		150.6	0.0788646	0.0781775	0.0607066	0.060577	0.0331966	0.0339328	0.0213635	0.0211918		150.6	0.246595	0.244044	0.208389	0.205682	0.160194	0.157507	0.127147	0.123888
			150.8	0.508189	0.502698	0.474464	0.471648	0.401972	0.402195	0.355968	0.354535		150.8	0.078852	0.0782006	0.0609084	0.0605978	0.0328322	0.033943	0.0209188	0.0211973		150.8	0.246874	0.244087	0.208651	0.205717	0.160265	0.157528	0.12755	0.123891
			151	0.508418	0.502757	0.474591	0.47169	0.402424	0.402261	0.356178	0.354657		151	0.0789815	0.0782237	0.0608967	0.0606185	0.032726	0.0339533	0.020864	0.0212028		151	0.247171	0.24413	0.208948	0.205751	0.160253	0.157549	0.127845	0.123894
			151.2	0.508364	0.502815	0.474697	0.471732	0.402458	0.402326	0.356315	0.354778		151.2	0.079383	0.0782467	0.0608059	0.0606393	0.0328152	0.0339635	0.0212574	0.0212082		151.2	0.247916	0.244174	0.208694	0.205786	0.160303	0.157571	0.128109	0.123897
			151.4	0.508729	0.502873	0.4748	0.471774	0.40251	0.402392	0.356278	0.354899		151.4	0.0793583	0.0782697	0.060582	0.06066	0.0330914	0.0339737	0.0213462	0.0212137		151.4	0.247475	0.244217	0.208768	0.20582	0.159754	0.157592	0.127714	0.1239
			151.6	0.508633	0.502931	0.475047	0.471815	0.402481	0.402457	0.356587	0.35502		151.6	0.0795519	0.0782928	0.0609474	0.0606808	0.0337699	0.033984	0.0217783	0.0212192		151.6	0.247469	0.24426	0.208743	0.205855	0.159593	0.157613	0.127498	0.123903
			151.8	0.508629	0.502989	0.475381	0.471857	0.402892	0.402521	0.357146	0.355141		151.8	0.0797562	0.0783158	0.0610531	0.0607015	0.0336963	0.0339942	0.0218787	0.0212247		151.8	0.247311	0.244303	0.208716	0.205889	0.159587	0.157634	0.126711	0.123906
			152	0.508437	0.503047	0.475503	0.471899	0.402656	0.402586	0.357526	0.355261		152	0.0795056	0.0783387	0.0609878	0.0607222	0.0336409	0.0340044	0.0217159	0.0212302		152	0.247201	0.244347	0.209039	0.205923	0.159502	0.157655	0.126527	0.12391
			152.2	0.508288	0.503105	0.475603	0.471941	0.402203	0.40265	0.357568	0.355381		152.2	0.0795347	0.0783617	0.0613519	0.0607429	0.0337338	0.0340146	0.0214762	0.0212357		152.2	0.247574	0.24439	0.209076	0.205958	0.159125	0.157676	0.125838	0.123913
			152.4	0.507779	0.503163	0.474899	0.471982	0.401506	0.402715	0.357292	0.355501		152.4	0.0800552	0.0783847	0.0612712	0.0607635	0.0340952	0.0340248	0.0215723	0.0212412		152.4	0.24744	0.244433	0.209287	0.205992	0.158927	0.157697	0.124954	0.123916
			152.6	0.507537	0.503221	0.475213	0.472024	0.401812	0.402779	0.357639	0.35562		152.6	0.0807088	0.0784076	0.061712	0.0607842	0.03456	0.0340351	0.0215521	0.0212467		152.6	0.247487	0.244476	0.209056	0.206026	0.158616	0.157717	0.124593	0.123919
			152.8	0.507177	0.503279	0.475131	0.472065	0.401169	0.402843	0.357209	0.355739		152.8	0.0807669	0.0784305	0.0622487	0.0608048	0.0345216	0.0340453	0.0217718	0.0212522		152.8	0.247113	0.244519	0.208225	0.20606	0.158845	0.157738	0.123757	0.123922
			153	0.506867	0.503337	0.474564	0.472107	0.400683	0.402906	0.356862	0.355857		153	0.0808006	0.0784534	0.0624601	0.0608254	0.0342783	0.0340555	0.0216669	0.0212576		153	0.24645	0.244562	0.207743	0.206095	0.15851	0.157759	0.123498	0.123925
			153.2	0.506167	0.503395	0.474222	0.472149	0.400312	0.40297	0.356771	0.355976		153.2	0.080884	0.0784763	0.0619445	0.060846	0.033755	0.0340657	0.0216272	0.0212631		153.2	0.247346	0.244605	0.208453	0.206129	0.159516	0.15778	0.124373	0.123927
			153.4	0.506556	0.503453	0.474407	0.47219	0.400647	0.403033	0.356833	0.356094		153.4	0.0798871	0.0784991	0.0615945	0.0608666	0.0334786	0.0340759	0.0210967	0.0212686		153.4	0.247995	0.244648	0.208685	0.206163	0.160069	0.157801	0.124878	0.12393
			153.6	0.506734	0.503511	0.474451	0.472232	0.400817	0.403096	0.357071	0.356211		153.6	0.07928	0.078522	0.0610035	0.0608872	0.033125	0.0340861	0.0209292	0.0212741		153.6	0.24834	0.24469	0.209061	0.206197	0.160092	0.157822	0.125335	0.123933
			153.8	0.50657	0.503569	0.473855	0.472273	0.400687	0.403159	0.356868	0.356329		153.8	0.0794695	0.0785448	0.0613754	0.0609078	0.0334618	0.0340963	0.0211093	0.0212796		153.8	0.248637	0.244733	0.208759	0.206231	0.160032	0.157842	0.126145	0.123936
			154	0.506941	0.503626	0.473747	0.472315	0.401076	0.403222	0.357009	0.356446		154	0.079122	0.0785676	0.0613296	0.0609283	0.0337254	0.0341065	0.020737	0.0212851		154	0.248385	0.244776	0.208886	0.206265	0.159738	0.157863	0.126499	0.123939
			154.2	0.507497	0.503684	0.47361	0.472357	0.400768	0.403285	0.356602	0.356562		154.2	0.0786128	0.0785904	0.0609006	0.0609489	0.0335459	0.0341167	0.0201261	0.0212906		154.2	0.248555	0.244819	0.208951	0.206299	0.160114	0.157884	0.126542	0.123942
			154.4	0.507757	0.503742	0.473666	0.472398	0.400948	0.403347	0.356939	0.356679		154.4	0.0783451	0.0786132	0.060811	0.0609694	0.0332348	0.0341269	0.0197213	0.0212961		154.4	0.248662	0.244862	0.209301	0.206333	0.160355	0.157905	0.126992	0.123945
			154.6	0.507604	0.503799	0.473793	0.47244	0.400799	0.403409	0.356545	0.356795		154.6	0.0784491	0.078636	0.0612495	0.0609899	0.0336593	0.0341371	0.0197774	0.0213015		154.6	0.248345	0.244904	0.209452	0.206367	0.160693	0.157925	0.127407	0.123947
			154.8	0.507188	0.503857	0.473567	0.472481	0.400608	0.403471	0.356204	0.35691		154.8	0.0786643	0.0786587	0.0616866	0.0610104	0.033767	0.0341473	0.020029	0.021307		154.8	0.248353	0.244947	0.209914	0.206401	0.160881	0.157946	0.127969	0.12395
			155	0.507727	0.503915	0.474133	0.472523	0.401162	0.403533	0.35668	0.357026		155	0.0788657	0.0786815	0.0615982	0.0610309	0.0340428	0.0341575	0.0201928	0.0213125		155	0.248641	0.244989	0.210278	0.206435	0.161371	0.157967	0.128193	0.123953
			155.2	0.507679	0.503972	0.474234	0.472564	0.40116	0.403595	0.356567	0.357141		155.2	0.0785992	0.0787042	0.0613719	0.0610513	0.0340762	0.0341677	0.0200868	0.021318		155.2	0.248718	0.245032	0.210098	0.206469	0.16139	0.157987	0.127716	0.123956
			155.4	0.508022	0.50403	0.474238	0.472605	0.401331	0.403657	0.356456	0.357256		155.4	0.0784381	0.0787269	0.0613828	0.0610718	0.0340557	0.0341778	0.0199918	0.0213235		155.4	0.248177	0.245075	0.21012	0.206503	0.161167	0.158008	0.12725	0.123958
			155.6	0.507966	0.504087	0.47413	0.472647	0.40112	0.403718	0.356689	0.35737		155.6	0.0787667	0.0787496	0.061695	0.0610922	0.0344769	0.034188	0.0203076	0.021329		155.6	0.248317	0.245117	0.209935	0.206537	0.161295	0.158028	0.126747	0.123961
			155.8	0.508218	0.504145	0.474376	0.472688	0.401381	0.403779	0.356855	0.357484		155.8	0.078498	0.0787723	0.0612103	0.0611126	0.0343004	0.0341982	0.0200436	0.0213344		155.8	0.248146	0.24516	0.210157	0.206571	0.161427	0.158049	0.126429	0.123964
			156	0.508154	0.504202	0.474401	0.47273	0.401079	0.40384	0.356567	0.357598		156	0.0785126	0.0787949	0.0614632	0.061133	0.0345888	0.0342084	0.0199167	0.0213399		156	0.247873	0.245202	0.210381	0.206604	0.161346	0.158069	0.126207	0.123967
			156.2	0.508515	0.50426	0.474563	0.472771	0.401449	0.403901	0.35691	0.357711		156.2	0.0787755	0.0788176	0.0611827	0.0611534	0.0345369	0.0342186	0.0197113	0.0213454		156.2	0.247734	0.245244	0.210052	0.206638	0.161309	0.15809	0.125823	0.123969
			156.4	0.508236	0.504317	0.474429	0.472812	0.401613	0.403962	0.357145	0.357825		156.4	0.0789956	0.0788402	0.0608047	0.0611738	0.0343568	0.0342287	0.0196313	0.0213509		156.4	0.247572	0.245287	0.210314	0.206672	0.161809	0.15811	0.125951	0.123972
			156.6	0.508595	0.504375	0.474761	0.472854	0.402124	0.404022	0.357336	0.357938		156.6	0.0792726	0.0788628	0.0613475	0.0611942	0.0342834	0.0342389	0.0195596	0.0213564		156.6	0.247769	0.245329	0.210303	0.206706	0.162005	0.158131	0.126269	0.123974
			156.8	0.508639	0.504432	0.474933	0.472895	0.402139	0.404083	0.357591	0.35805		156.8	0.0788459	0.0788854	0.0613274	0.0612145	0.0336229	0.0342491	0.0195101	0.0213619		156.8	0.24758	0.245371	0.210267	0.206739	0.161809	0.158151	0.126399	0.123977
			157	0.508766	0.504489	0.475129	0.472936	0.402551	0.404143	0.357959	0.358163		157	0.0787627	0.078908	0.0611039	0.0612349	0.033142	0.0342592	0.0193842	0.0213673		157	0.247695	0.245414	0.210506	0.206773	0.161236	0.158172	0.126196	0.12398
			157.2	0.508665	0.504547	0.475473	0.472978	0.402929	0.404203	0.358423	0.358275		157.2	0.078812	0.0789305	0.0607799	0.0612552	0.0331677	0.0342694	0.0196213	0.0213728		157.2	0.248334	0.245456	0.210891	0.206807	0.1614	0.158192	0.126695	0.123982
			157.4	0.509379	0.504604	0.47589	0.473019	0.403366	0.404263	0.358556	0.358386		157.4	0.0782689	0.0789531	0.0608664	0.0612755	0.0330726	0.0342796	0.0191029	0.0213783		157.4	0.248388	0.245498	0.210809	0.20684	0.160643	0.158212	0.126675	0.123985
			157.6	0.509428	0.504661	0.476245	0.47306	0.403569	0.404322	0.359031	0.358498		157.6	0.0784307	0.0789756	0.0605011	0.0612958	0.0328184	0.0342897	0.0191151	0.0213838		157.6	0.248675	0.24554	0.210788	0.206874	0.159961	0.158233	0.12677	0.123987
			157.8	0.509619	0.504718	0.476531	0.473102	0.403834	0.404382	0.359609	0.358609		157.8	0.0787413	0.0789982	0.0608462	0.0613161	0.0327299	0.0342999	0.0193237	0.0213893		157.8	0.248846	0.245582	0.210414	0.206908	0.159627	0.158253	0.126941	0.12399
			158	0.50987	0.504776	0.476835	0.473143	0.403498	0.404441	0.359864	0.358719		158	0.0786233	0.0790207	0.0608152	0.0613364	0.0327861	0.0343101	0.0193522	0.0213947		158	0.248642	0.245624	0.21007	0.206941	0.158904	0.158273	0.126685	0.123992
			158.2	0.509622	0.504833	0.476646	0.473184	0.402942	0.4045	0.359927	0.35883		158.2	0.0783752	0.0790431	0.0608437	0.0613567	0.0324325	0.0343202	0.0193673	0.0214002		158.2	0.248688	0.245666	0.209977	0.206975	0.15866	0.158293	0.126541	0.123995
			158.4	0.509548	0.50489	0.477154	0.473225	0.403255	0.40456	0.360218	0.35894		158.4	0.0783774	0.0790656	0.0608194	0.0613769	0.0324974	0.0343304	0.0193874	0.0214057		158.4	0.24836	0.245708	0.209543	0.207008	0.158189	0.158314	0.126388	0.123997
			158.6	0.509334	0.504947	0.477362	0.473267	0.402943	0.404618	0.360137	0.35905		158.6	0.0786149	0.0790881	0.0611773	0.0613972	0.0328728	0.0343405	0.0199511	0.0214112		158.6	0.248015	0.24575	0.209365	0.207042	0.158073	0.158334	0.1262	0.124
			158.8	0.509424	0.505004	0.477469	0.473308	0.403383	0.404677	0.360702	0.35916		158.8	0.0792741	0.0791105	0.0615527	0.0614174	0.0335949	0.0343507	0.0206195	0.0214167		158.8	0.24879	0.245792	0.209888	0.207075	0.15813	0.158354	0.126708	0.124002
			159	0.509524	0.505061	0.477187	0.473349	0.403067	0.404736	0.360529	0.359269		159	0.0795882	0.079133	0.0617257	0.0614376	0.0338799	0.0343608	0.0210214	0.0214221		159	0.24891	0.245834	0.209496	0.207108	0.158107	0.158374	0.126321	0.124004
			159.2	0.509424	0.505118	0.477308	0.47339	0.402896	0.404794	0.360426	0.359378		159.2	0.0794817	0.0791554	0.0618124	0.0614578	0.0338522	0.034371	0.0212207	0.0214276		159.2	0.249188	0.245876	0.209377	0.207142	0.158097	0.158394	0.12631	0.124007
			159.4	0.509565	0.505175	0.477167	0.473431	0.403143	0.404852	0.360464	0.359487		159.4	0.079741	0.0791778	0.0623239	0.061478	0.0343286	0.0343811	0.0218938	0.0214331		159.4	0.24909	0.245918	0.209051	0.207175	0.158379	0.158414	0.126259	0.124009
			159.6	0.509926	0.505232	0.477045	0.473472	0.403507	0.40491	0.360406	0.359595		159.6	0.0803586	0.0792002	0.0626317	0.0614981	0.0346879	0.0343913	0.0222568	0.0214386		159.6	0.249108	0.24596	0.209141	0.207208	0.158901	0.158434	0.126764	0.124012
			159.8	0.509919	0.505289	0.477019	0.473514	0.403767	0.404968	0.360522	0.359703		159.8	0.0807321	0.0792225	0.0630225	0.0615183	0.0350067	0.0344014	0.0225508	0.021444		159.8	0.248791	0.246002	0.209255	0.207242	0.159303	0.158454	0.126865	0.124014
			160	0.509752	0.505346	0.477062	0.473555	0.404013	0.405026	0.36086	0.359811		160	0.08119	0.0792449	0.0635297	0.0615385	0.0351697	0.0344115	0.0228686	0.0214495		160	0.248812	0.246043	0.209235	0.207275	0.15936	0.158475	0.126495	0.124016
			160.2	0.509787	0.505403	0.477011	0.473596	0.404701	0.405084	0.361499	0.359919		160.2	0.0813204	0.0792672	0.0635472	0.0615586	0.0355437	0.0344217	0.0228947	0.021455		160.2	0.24854	0.246085	0.209456	0.207308	0.159343	0.158495	0.126474	0.124019
			160.4	0.509796	0.50546	0.4768	0.473637	0.405155	0.405141	0.361725	0.360026		160.4	0.0814127	0.0792896	0.0634489	0.0615787	0.0353677	0.0344318	0.0227506	0.0214605		160.4	0.248771	0.246127	0.209537	0.207341	0.159485	0.158515	0.126454	0.124021
			160.6	0.509466	0.505516	0.476633	0.473678	0.405284	0.405199	0.361602	0.360133		160.6	0.08106	0.0793119	0.063527	0.0615988	0.0350542	0.0344419	0.0229616	0.021466		160.6	0.249102	0.246168	0.209695	0.207375	0.159591	0.158535	0.126019	0.124023
			160.8	0.509238	0.505573	0.476977	0.473719	0.405533	0.405256	0.361815	0.360239		160.8	0.0805914	0.0793342	0.0628481	0.0616189	0.0350378	0.0344521	0.0228994	0.0214714		160.8	0.248918	0.24621	0.209909	0.207408	0.158996	0.158554	0.126194	0.124025
			161	0.509355	0.50563	0.47696	0.47376	0.40531	0.405313	0.361635	0.360346		161	0.0807594	0.0793565	0.0624022	0.061639	0.0351397	0.0344622	0.0230495	0.0214769		161	0.248972	0.246252	0.209488	0.207441	0.158901	0.158574	0.125393	0.124028
			161.2	0.509511	0.505687	0.477325	0.473801	0.405706	0.40537	0.361597	0.360452		161.2	0.0809778	0.0793788	0.062224	0.0616591	0.0351444	0.0344723	0.0230449	0.0214824		161.2	0.249388	0.246293	0.209911	0.207474	0.158868	0.158594	0.125834	0.12403
			161.4	0.509776	0.505743	0.47774	0.473842	0.405722	0.405427	0.361934	0.360558		161.4	0.0807486	0.079401	0.0620368	0.0616792	0.034937	0.0344825	0.0227062	0.0214879		161.4	0.249746	0.246335	0.210176	0.207507	0.158911	0.158614	0.125594	0.124032
			161.6	0.509847	0.5058	0.477962	0.473883	0.406125	0.405483	0.362491	0.360663		161.6	0.0804345	0.0794233	0.0611848	0.0616992	0.0347991	0.0344926	0.0226196	0.0214933		161.6	0.249761	0.246376	0.210338	0.20754	0.158786	0.158634	0.12506	0.124034
			161.8	0.510014	0.505857	0.477791	0.473924	0.406157	0.40554	0.36241	0.360769		161.8	0.0802697	0.0794455	0.061294	0.0617193	0.0346396	0.0345027	0.0228403	0.0214988		161.8	0.249432	0.246418	0.209594	0.207573	0.158441	0.158654	0.124892	0.124037
			162	0.510181	0.505913	0.477955	0.473965	0.406009	0.405596	0.362407	0.360873		162	0.0796985	0.0794677	0.0609046	0.0617393	0.0345291	0.0345128	0.0223286	0.0215043		162	0.249461	0.246459	0.210186	0.207606	0.15813	0.158674	0.124857	0.124039
			162.2	0.510117	0.50597	0.478014	0.474006	0.405998	0.405652	0.362427	0.360978		162.2	0.0793779	0.0794899	0.0607317	0.0617593	0.0343208	0.0345229	0.0222534	0.0215097		162.2	0.249673	0.2465	0.210146	0.207639	0.158144	0.158693	0.124629	0.124041
			162.4	0.510408	0.506027	0.478036	0.474047	0.406178	0.405708	0.362488	0.361083		162.4	0.0789197	0.0795121	0.0603731	0.0617793	0.0342831	0.0345331	0.0220554	0.0215152		162.4	0.24964	0.246542	0.210139	0.207672	0.158001	0.158713	0.124528	0.124043
			162.6	0.510377	0.506083	0.477849	0.474088	0.405717	0.405764	0.362398	0.361187		162.6	0.0788352	0.0795343	0.0604911	0.0617993	0.0347521	0.0345432	0.0222803	0.0215207		162.6	0.249936	0.246583	0.21046	0.207705	0.158273	0.158733	0.124762	0.124045
			162.8	0.510534	0.50614	0.477781	0.474129	0.405393	0.40582	0.362286	0.361291		162.8	0.0789443	0.0795564	0.0608507	0.0618193	0.0348947	0.0345533	0.0223238	0.0215262		162.8	0.250209	0.246624	0.210519	0.207738	0.158566	0.158753	0.125187	0.124047
			163	0.510785	0.506196	0.477637	0.47417	0.404689	0.405875	0.361663	0.361394		163	0.0790259	0.0795786	0.0608214	0.0618392	0.0347751	0.0345634	0.0226687	0.0215316		163	0.249933	0.246666	0.210327	0.207771	0.158961	0.158772	0.125433	0.124049
			163.2	0.51079	0.506253	0.478047	0.47421	0.404656	0.405931	0.361838	0.361497		163.2	0.0795053	0.0796007	0.0609671	0.0618592	0.0345713	0.0345735	0.0226336	0.0215371		163.2	0.250027	0.246707	0.21081	0.207804	0.159647	0.158792	0.125929	0.124051
			163.4	0.510634	0.506309	0.477954	0.474251	0.404746	0.405986	0.361664	0.3616		163.4	0.0797953	0.0796229	0.0612286	0.0618791	0.0350429	0.0345836	0.0231757	0.0215426		163.4	0.250105	0.246748	0.210997	0.207837	0.160458	0.158812	0.126543	0.124053
			163.6	0.510479	0.506365	0.478009	0.474292	0.404493	0.406041	0.361775	0.361703		163.6	0.080471	0.079645	0.0617872	0.0618991	0.0351087	0.0345937	0.023305	0.0215481		163.6	0.249996	0.246789	0.21129	0.20787	0.160273	0.158831	0.127055	0.124056
			163.8	0.510074	0.506422	0.477577	0.474333	0.403758	0.406096	0.361939	0.361806		163.8	0.0805848	0.0796671	0.0622571	0.061919	0.0353455	0.0346038	0.0234189	0.0215535		163.8	0.249902	0.24683	0.211093	0.207902	0.160055	0.158851	0.126697	0.124058
			164	0.509773	0.506478	0.477431	0.474374	0.40371	0.406151	0.361987	0.361908		164	0.0803938	0.0796891	0.0623551	0.0619389	0.0350274	0.0346139	0.023212	0.021559		164	0.250236	0.246871	0.211835	0.207935	0.160361	0.15887	0.126713	0.12406
			164.2	0.509621	0.506534	0.477552	0.474415	0.403436	0.406206	0.362191	0.36201		164.2	0.0802756	0.0797112	0.0621298	0.0619588	0.0354433	0.034624	0.0228732	0.0215645		164.2	0.250052	0.246912	0.211816	0.207968	0.160091	0.15889	0.126808	0.124062
			164.4	0.509304	0.506591	0.47755	0.474455	0.40315	0.40626	0.362229	0.362112		164.4	0.0805887	0.0797333	0.0619231	0.0619787	0.0350894	0.0346341	0.0227165	0.0215699		164.4	0.250502	0.246953	0.212088	0.208001	0.160456	0.15891	0.127469	0.124064
			164.6	0.509113	0.506647	0.477392	0.474496	0.403302	0.406315	0.362107	0.362213		164.6	0.0802783	0.0797553	0.0620688	0.0619986	0.0354942	0.0346442	0.0228551	0.0215754		164.6	0.250663	0.246994	0.212406	0.208033	0.160516	0.158929	0.128049	0.124066
			164.8	0.509219	0.506703	0.477451	0.474537	0.403139	0.406369	0.361949	0.362314		164.8	0.0800591	0.0797774	0.0616801	0.0620184	0.0357506	0.0346543	0.0222811	0.0215809		164.8	0.250696	0.247035	0.212126	0.208066	0.160182	0.158949	0.128613	0.124068
			165	0.509124	0.506759	0.477283	0.474578	0.402998	0.406423	0.361828	0.362415		165	0.0804953	0.0797994	0.0618953	0.0620383	0.0360329	0.0346644	0.0224156	0.0215863		165	0.250438	0.247076	0.211596	0.208099	0.16026	0.158968	0.128124	0.12407
			165.2	0.509067	0.506816	0.477658	0.474618	0.403544	0.406477	0.362029	0.362515		165.2	0.080895	0.0798214	0.0624568	0.0620581	0.0362676	0.0346745	0.0223877	0.0215918		165.2	0.250622	0.247117	0.211695	0.208131	0.160427	0.158988	0.128558	0.124071
			165.4	0.509009	0.506872	0.477489	0.474659	0.403699	0.406531	0.362623	0.362616		165.4	0.0811485	0.0798434	0.0627554	0.062078	0.036513	0.0346846	0.0222506	0.0215973		165.4	0.251085	0.247158	0.211603	0.208164	0.16088	0.159007	0.128111	0.124073
			165.6	0.509807	0.506928	0.47717	0.4747	0.404338	0.406585	0.36289	0.362716		165.6	0.0812204	0.0798653	0.0623707	0.0620978	0.0367331	0.0346947	0.0221967	0.0216027		165.6	0.251305	0.247199	0.211397	0.208196	0.160629	0.159026	0.127736	0.124075
			165.8	0.510606	0.506984	0.477207	0.474741	0.404971	0.406639	0.363342	0.362816		165.8	0.0813575	0.0798873	0.062831	0.0621176	0.0366145	0.0347048	0.0222738	0.0216082		165.8	0.25173	0.24724	0.211275	0.208229	0.160666	0.159046	0.127877	0.124077
			166	0.51078	0.50704	0.477538	0.474781	0.405162	0.406692	0.364129	0.362915		166	0.0809799	0.0799093	0.0629853	0.0621374	0.0363881	0.0347148	0.0217259	0.0216137		166	0.252164	0.24728	0.211569	0.208261	0.160669	0.159065	0.127724	0.124079
			166.2	0.511095	0.507096	0.4776	0.474822	0.405401	0.406745	0.364433	0.363014		166.2	0.0809217	0.0799312	0.0631155	0.0621572	0.0362751	0.0347249	0.0217537	0.0216192		166.2	0.252098	0.247321	0.211068	0.208294	0.160532	0.159084	0.12736	0.124081
			166.4	0.511369	0.507152	0.47757	0.474863	0.405572	0.406799	0.364388	0.363113		166.4	0.0803277	0.0799531	0.0630553	0.062177	0.0359039	0.034735	0.0215372	0.0216246		166.4	0.251942	0.247362	0.21092	0.208326	0.160746	0.159104	0.127354	0.124083
			166.6	0.511803	0.507208	0.477416	0.474903	0.405406	0.406852	0.364162	0.363212		166.6	0.0800381	0.079975	0.0628184	0.0621967	0.0356763	0.0347451	0.0214206	0.0216301		166.6	0.252101	0.247403	0.210934	0.208359	0.161214	0.159123	0.127268	0.124085
			166.8	0.511845	0.507264	0.477165	0.474944	0.405225	0.406905	0.364123	0.363311		166.8	0.0802121	0.079997	0.0632033	0.0622165	0.0354618	0.0347552	0.0214325	0.0216356		166.8	0.251759	0.247443	0.210655	0.208391	0.161522	0.159142	0.126842	0.124087
			167	0.511877	0.50732	0.477353	0.474984	0.405411	0.406958	0.364266	0.363409		167	0.0805025	0.0800188	0.0632418	0.0622362	0.0354403	0.0347652	0.0217849	0.021641		167	0.251683	0.247484	0.211063	0.208424	0.16133	0.159162	0.126729	0.124088
			167.2	0.51201	0.507376	0.477718	0.475025	0.405633	0.40701	0.364968	0.363507		167.2	0.0810399	0.0800407	0.0634856	0.062256	0.0356452	0.0347753	0.0224225	0.0216465		167.2	0.25178	0.247524	0.211157	0.208456	0.161541	0.159181	0.126914	0.12409
			167.4	0.512268	0.507432	0.478049	0.475066	0.405861	0.407063	0.365045	0.363604		167.4	0.0807038	0.0800626	0.0634513	0.0622757	0.0356947	0.0347854	0.0227725	0.0216519		167.4	0.25161	0.247565	0.21144	0.208488	0.161479	0.1592	0.126958	0.124092
			167.6	0.512435	0.507487	0.478272	0.475106	0.405684	0.407116	0.365488	0.363702		167.6	0.0807913	0.0800844	0.0634777	0.0622954	0.0353632	0.0347954	0.0227889	0.0216574		167.6	0.251301	0.247605	0.211346	0.208521	0.160931	0.159219	0.126502	0.124094
			167.8	0.512446	0.507543	0.477941	0.475147	0.405475	0.407168	0.365387	0.363799		167.8	0.0803739	0.0801063	0.0627817	0.0623151	0.0345787	0.0348055	0.0225447	0.0216629		167.8	0.250911	0.247646	0.211539	0.208553	0.160841	0.159238	0.126312	0.124096
			168	0.51203	0.507599	0.478024	0.475187	0.405436	0.40722	0.36516	0.363896		168	0.0805052	0.0801281	0.0626488	0.0623348	0.0342473	0.0348156	0.0223882	0.0216683		168	0.250844	0.247686	0.212108	0.208585	0.161178	0.159258	0.126274	0.124097
			168.2	0.512062	0.507655	0.478176	0.475228	0.405507	0.407272	0.364929	0.363993		168.2	0.0804829	0.0801499	0.0626744	0.0623545	0.0344629	0.0348256	0.0226363	0.0216738		168.2	0.25036	0.247727	0.211908	0.208617	0.160848	0.159277	0.126376	0.124099
			168.4	0.511786	0.50771	0.478471	0.475268	0.40581	0.407324	0.36474	0.364089		168.4	0.0803342	0.0801717	0.0627239	0.0623742	0.0341419	0.0348357	0.0227321	0.0216793		168.4	0.250182	0.247767	0.21246	0.20865	0.160275	0.159296	0.126849	0.124101
			168.6	0.511544	0.507766	0.477856	0.475309	0.405951	0.407376	0.364656	0.364185		168.6	0.0799388	0.0801935	0.0625453	0.0623938	0.0343274	0.0348458	0.0226819	0.0216847		168.6	0.250162	0.247808	0.21211	0.208682	0.159795	0.159315	0.126707	0.124103
			168.8	0.51119	0.507822	0.477896	0.475349	0.405809	0.407428	0.364474	0.364281		168.8	0.0794473	0.0802153	0.0627218	0.0624135	0.0337331	0.0348558	0.0220823	0.0216902		168.8	0.249876	0.247848	0.211569	0.208714	0.159079	0.159334	0.126181	0.124104
			169	0.510942	0.507877	0.478162	0.47539	0.406288	0.407479	0.364758	0.364377		169	0.0803189	0.0802371	0.0630837	0.0624331	0.0340477	0.0348659	0.0226543	0.0216957		169	0.249447	0.247888	0.211406	0.208746	0.159084	0.159353	0.125654	0.124106
			169.2	0.510919	0.507933	0.478375	0.47543	0.406458	0.407531	0.364327	0.364472		169.2	0.0805178	0.0802588	0.0630813	0.0624528	0.0337189	0.0348759	0.0224914	0.0217011		169.2	0.249772	0.247928	0.21152	0.208778	0.158975	0.159372	0.125445	0.124108
			169.4	0.510858	0.507989	0.477896	0.475471	0.406464	0.407582	0.364156	0.364567		169.4	0.0808202	0.0802806	0.0627426	0.0624724	0.033453	0.034886	0.022181	0.0217066		169.4	0.250063	0.247969	0.211691	0.20881	0.158866	0.159391	0.125733	0.124109
			169.6	0.511253	0.508044	0.477864	0.475511	0.406576	0.407634	0.364217	0.364662		169.6	0.0812455	0.0803023	0.0626247	0.062492	0.0334337	0.034896	0.0221024	0.0217121		169.6	0.250188	0.248009	0.211664	0.208842	0.158698	0.15941	0.125918	0.124111
			169.8	0.511485	0.5081	0.478131	0.475551	0.407014	0.407685	0.364669	0.364757		169.8	0.0817896	0.080324	0.0631039	0.0625116	0.0333997	0.0349061	0.022152	0.0217175		169.8	0.250413	0.248049	0.211413	0.208875	0.158829	0.159429	0.126431	0.124113
			170	0.511272	0.508155	0.47774	0.475592	0.40664	0.407736	0.364504	0.364851		170	0.0819256	0.0803457	0.063163	0.0625312	0.0335152	0.0349161	0.0221457	0.021723		170	0.250685	0.248089	0.211291	0.208907	0.158637	0.159448	0.126549	0.124114
			170.2	0.511027	0.508211	0.477234	0.475632	0.406355	0.407787	0.36401	0.364946		170.2	0.0820774	0.0803674	0.0629846	0.0625508	0.0335589	0.0349262	0.0221158	0.0217284		170.2	0.250634	0.248129	0.211349	0.208939	0.15879	0.159467	0.126703	0.124116
			170.4	0.510961	0.508266	0.476485	0.475673	0.405952	0.407837	0.363717	0.365039		170.4	0.0819447	0.0803891	0.062761	0.0625703	0.0336209	0.0349362	0.0218664	0.0217339		170.4	0.250471	0.248169	0.211131	0.208971	0.158646	0.159486	0.126491	0.124118
			170.6	0.511022	0.508322	0.476181	0.475713	0.405662	0.407888	0.364001	0.365133		170.6	0.0820465	0.0804108	0.0626504	0.0625899	0.0340864	0.0349463	0.021652	0.0217394		170.6	0.250039	0.248209	0.210965	0.209002	0.158443	0.159504	0.125858	0.124119
			170.8	0.511008	0.508377	0.476206	0.475753	0.405828	0.407939	0.364253	0.365227		170.8	0.0820127	0.0804324	0.0629688	0.0626094	0.0343455	0.0349563	0.0215358	0.0217448		170.8	0.249732	0.248249	0.210923	0.209034	0.158533	0.159523	0.125719	0.124121
			171	0.511255	0.508432	0.476616	0.475794	0.40633	0.407989	0.364852	0.36532		171	0.0820396	0.0804541	0.0631258	0.062629	0.0346431	0.0349663	0.0216322	0.0217503		171	0.249748	0.248289	0.211137	0.209066	0.158814	0.159542	0.126169	0.124122
			171.2	0.511981	0.508488	0.47679	0.475834	0.406464	0.408039	0.365696	0.365413		171.2	0.0823177	0.0804757	0.0631743	0.0626485	0.035271	0.0349764	0.0219588	0.0217557		171.2	0.249614	0.248329	0.211108	0.209098	0.159532	0.159561	0.126425	0.124124
			171.4	0.51239	0.508543	0.477166	0.475874	0.407008	0.408089	0.366323	0.365505		171.4	0.0822847	0.0804973	0.0630344	0.062668	0.0352013	0.0349864	0.0215719	0.0217612		171.4	0.249514	0.248369	0.21125	0.20913	0.159726	0.15958	0.126342	0.124126
			171.6	0.512604	0.508598	0.477143	0.475914	0.407212	0.40814	0.366774	0.365598		171.6	0.0821467	0.0805189	0.0627913	0.0626876	0.0354973	0.0349965	0.0216396	0.0217667		171.6	0.24955	0.248409	0.211317	0.209162	0.159994	0.159598	0.12642	0.124127
			171.8	0.512739	0.508653	0.477139	0.475955	0.407211	0.40819	0.366734	0.36569		171.8	0.0821172	0.0805405	0.0626963	0.0627071	0.0354701	0.0350065	0.0217181	0.0217721		171.8	0.249501	0.248449	0.211334	0.209194	0.160132	0.159617	0.126192	0.124129
			172	0.512906	0.508709	0.477715	0.475995	0.40765	0.408239	0.367129	0.365782		172	0.0821901	0.0805621	0.0629137	0.0627265	0.0354352	0.0350165	0.021585	0.0217776		172	0.24969	0.248489	0.211627	0.209226	0.160679	0.159636	0.12638	0.12413
			172.2	0.513278	0.508764	0.478048	0.476035	0.40814	0.408289	0.36754	0.365874		172.2	0.0819679	0.0805837	0.0630576	0.062746	0.035597	0.0350265	0.0215757	0.021783		172.2	0.24962	0.248529	0.211749	0.209257	0.161073	0.159654	0.12649	0.124132
			172.4	0.513458	0.508819	0.478816	0.476075	0.408583	0.408339	0.368293	0.365965		172.4	0.0813469	0.0806053	0.0627083	0.0627655	0.0355651	0.0350366	0.0212425	0.0217885		172.4	0.249997	0.248569	0.211993	0.209289	0.161131	0.159673	0.126555	0.124133
			172.6	0.513853	0.508874	0.478943	0.476116	0.408396	0.408388	0.368693	0.366057		172.6	0.0813443	0.0806268	0.0629281	0.062785	0.0355923	0.0350466	0.0209899	0.021794		172.6	0.250585	0.248608	0.212074	0.209321	0.161431	0.159692	0.12616	0.124135
			172.8	0.513654	0.508929	0.479486	0.476156	0.408628	0.408438	0.368627	0.366148		172.8	0.0808901	0.0806484	0.0628955	0.0628044	0.0351672	0.0350566	0.0207514	0.0217994		172.8	0.250838	0.248648	0.21239	0.209352	0.161502	0.15971	0.125907	0.124136
			173	0.513361	0.508984	0.479212	0.476196	0.408437	0.408487	0.368088	0.366238		173	0.0809775	0.0806699	0.0624599	0.0628239	0.0350582	0.0350666	0.020822	0.0218049		173	0.2511	0.248688	0.212785	0.209384	0.161962	0.159729	0.126289	0.124138
			173.2	0.513285	0.509039	0.479203	0.476236	0.408117	0.408536	0.367547	0.366329		173.2	0.0811226	0.0806914	0.0622449	0.0628433	0.0350967	0.0350767	0.0203896	0.0218103		173.2	0.251399	0.248727	0.21273	0.209416	0.161502	0.159748	0.126725	0.124139
			173.4	0.513341	0.509094	0.479491	0.476276	0.40795	0.408585	0.367729	0.366419		173.4	0.081391	0.0807129	0.0620787	0.0628627	0.035291	0.0350867	0.020392	0.0218158		173.4	0.251554	0.248767	0.212514	0.209447	0.161317	0.159766	0.127136	0.124141
			173.6	0.513168	0.509149	0.479508	0.476316	0.407555	0.408634	0.367713	0.366509		173.6	0.0820873	0.0807344	0.0626436	0.0628821	0.0354823	0.0350967	0.0210186	0.0218212		173.6	0.251698	0.248807	0.212257	0.209479	0.16106	0.159785	0.127202	0.124142
			173.8	0.513206	0.509204	0.479719	0.476357	0.407504	0.408683	0.367682	0.366599		173.8	0.0824106	0.0807559	0.0629534	0.0629015	0.0357378	0.0351067	0.0215472	0.0218267		173.8	0.251509	0.248846	0.211425	0.209511	0.160207	0.159803	0.127425	0.124144
			174	0.513201	0.509259	0.479557	0.476397	0.406988	0.408732	0.367079	0.366689		174	0.0821003	0.0807774	0.0629601	0.0629209	0.0358087	0.0351167	0.0217776	0.0218321		174	0.251567	0.248886	0.211374	0.209542	0.159671	0.159822	0.127255	0.124145
			174.2	0.513038	0.509314	0.479533	0.476437	0.406631	0.40878	0.366764	0.366778		174.2	0.0823938	0.0807989	0.0627565	0.0629403	0.0357209	0.0351267	0.0220531	0.0218376		174.2	0.251139	0.248925	0.211222	0.209574	0.159166	0.15984	0.127198	0.124147
			174.4	0.513401	0.509369	0.479752	0.476477	0.406545	0.408829	0.366672	0.366867		174.4	0.0823179	0.0808203	0.0625873	0.0629597	0.0360381	0.0351368	0.0218073	0.0218431		174.4	0.250867	0.248965	0.211043	0.209605	0.158998	0.159859	0.126982	0.124148
			174.6	0.51323	0.509424	0.47993	0.476517	0.406536	0.408877	0.366426	0.366956		174.6	0.0824543	0.0808418	0.0629132	0.0629791	0.0363623	0.0351468	0.0216146	0.0218485		174.6	0.250896	0.249004	0.21088	0.209637	0.159265	0.159877	0.126898	0.124149
			174.8	0.51355	0.509479	0.479804	0.476557	0.406607	0.408926	0.366341	0.367045		174.8	0.0823626	0.0808632	0.0629871	0.0629984	0.0360843	0.0351568	0.0212406	0.021854		174.8	0.251229	0.249044	0.211243	0.209668	0.159529	0.159896	0.12738	0.124151
			175	0.514017	0.509534	0.479934	0.476597	0.40671	0.408974	0.366659	0.367133		175	0.0827321	0.0808846	0.0632434	0.0630178	0.0366805	0.0351668	0.0214598	0.0218594		175	0.251677	0.249083	0.211803	0.2097	0.159875	0.159914	0.127467	0.124152
			175.2	0.514485	0.509588	0.479801	0.476637	0.406786	0.409022	0.366593	0.367222		175.2	0.0827602	0.080906	0.0635301	0.0630371	0.0367393	0.0351768	0.0216651	0.0218649		175.2	0.251535	0.249122	0.212072	0.209731	0.160115	0.159932	0.127191	0.124154
			175.4	0.514502	0.509643	0.479964	0.476677	0.40731	0.40907	0.366836	0.36731		175.4	0.0829338	0.0809274	0.0638589	0.0630565	0.0367231	0.0351868	0.0215315	0.0218703		175.4	0.252053	0.249162	0.212054	0.209762	0.160269	0.159951	0.127588	0.124155
			175.6	0.514776	0.509698	0.479873	0.476717	0.407364	0.409118	0.367175	0.367398		175.6	0.0829626	0.0809488	0.0640621	0.0630758	0.0368691	0.0351968	0.0216667	0.0218758		175.6	0.252258	0.249201	0.212223	0.209794	0.16037	0.159969	0.127625	0.124156
			175.8	0.514781	0.509753	0.479931	0.476757	0.407714	0.409166	0.367328	0.367485		175.8	0.0829785	0.0809702	0.0638797	0.0630951	0.0365664	0.0352068	0.0216529	0.0218812		175.8	0.252541	0.24924	0.212301	0.209825	0.160997	0.159987	0.127257	0.124158
			176	0.514751	0.509807	0.480337	0.476797	0.408187	0.409213	0.367907	0.367572		176	0.0828339	0.0809916	0.0635353	0.0631144	0.0363059	0.0352168	0.0216296	0.0218867		176	0.252827	0.24928	0.212943	0.209856	0.162179	0.160006	0.127631	0.124159
			176.2	0.514886	0.509862	0.480104	0.476837	0.408315	0.409261	0.367896	0.36766		176.2	0.0828816	0.0810129	0.0634119	0.0631337	0.0364689	0.0352268	0.0216595	0.0218921		176.2	0.253316	0.249319	0.213409	0.209888	0.162918	0.160024	0.12759	0.12416
			176.4	0.514949	0.509916	0.480709	0.476877	0.408575	0.409309	0.368471	0.367746		176.4	0.0825872	0.0810343	0.0628071	0.063153	0.0359207	0.0352368	0.0215951	0.0218976		176.4	0.253542	0.249358	0.213867	0.209919	0.16318	0.160042	0.127454	0.124162
			176.6	0.515036	0.509971	0.480432	0.476917	0.408205	0.409356	0.368527	0.367833		176.6	0.08274	0.0810556	0.0631988	0.0631723	0.0358157	0.0352468	0.0217811	0.0219031		176.6	0.253848	0.249397	0.214759	0.20995	0.163443	0.16006	0.12745	0.124163
			176.8	0.514395	0.510026	0.480282	0.476957	0.408479	0.409403	0.36845	0.36792		176.8	0.0824696	0.0810769	0.0626566	0.0631916	0.0352657	0.0352568	0.0216102	0.0219085		176.8	0.253987	0.249436	0.214878	0.209981	0.164229	0.160079	0.127698	0.124164
			177	0.514323	0.51008	0.480059	0.476997	0.408243	0.40945	0.368556	0.368006		177	0.0828036	0.0810982	0.0626547	0.0632108	0.0354678	0.0352667	0.0217838	0.021914		177	0.253733	0.249475	0.214543	0.210013	0.164398	0.160097	0.127747	0.124166
			177.2	0.514035	0.510135	0.479994	0.477037	0.408304	0.409498	0.368875	0.368092		177.2	0.0831575	0.0811195	0.0627447	0.0632301	0.0355714	0.0352767	0.0219253	0.0219194		177.2	0.253345	0.249514	0.214347	0.210044	0.164114	0.160115	0.127272	0.124167
			177.4	0.513883	0.510189	0.480055	0.477076	0.408704	0.409545	0.369615	0.368178		177.4	0.0827461	0.0811408	0.0627984	0.0632493	0.0355281	0.0352867	0.0223316	0.0219249		177.4	0.252564	0.249553	0.213915	0.210075	0.163698	0.160133	0.126601	0.124168
			177.6	0.513776	0.510244	0.479875	0.477116	0.408575	0.409591	0.36968	0.368263		177.6	0.082865	0.0811621	0.0629771	0.0632686	0.0353117	0.0352967	0.0225911	0.0219303		177.6	0.252337	0.249593	0.21372	0.210106	0.16329	0.160151	0.126859	0.124169
			177.8	0.513543	0.510298	0.480084	0.477156	0.408809	0.409638	0.369812	0.368348		177.8	0.0826632	0.0811834	0.0628117	0.0632878	0.035191	0.0353067	0.0227689	0.0219358		177.8	0.252491	0.249631	0.21357	0.210137	0.16317	0.160169	0.126801	0.124171
			178	0.513628	0.510352	0.479891	0.477196	0.408998	0.409685	0.369825	0.368434		178	0.0827694	0.0812046	0.0630468	0.063307	0.0354919	0.0353167	0.0231289	0.0219412		178	0.25274	0.24967	0.213593	0.210168	0.163409	0.160187	0.126864	0.124172
			178.2	0.513787	0.510407	0.479601	0.477236	0.408901	0.409732	0.369917	0.368519		178.2	0.0833893	0.0812259	0.0629807	0.0633262	0.0354351	0.0353266	0.0234738	0.0219467		178.2	0.252457	0.249709	0.213113	0.210199	0.163047	0.160205	0.126394	0.124173
			178.4	0.513853	0.510461	0.479455	0.477276	0.408536	0.409778	0.369617	0.368603		178.4	0.0834648	0.0812471	0.0635412	0.0633454	0.0357569	0.0353366	0.0230441	0.0219521		178.4	0.252666	0.249748	0.213284	0.21023	0.163146	0.160223	0.126679	0.124174
			178.6	0.514103	0.510515	0.479207	0.477315	0.408542	0.409825	0.369356	0.368688		178.6	0.0834855	0.0812683	0.0638194	0.0633646	0.0358594	0.0353466	0.0227856	0.0219576		178.6	0.252651	0.249787	0.213222	0.210261	0.162691	0.160241	0.126637	0.124176
			178.8	0.514554	0.51057	0.479242	0.477355	0.407968	0.409871	0.369445	0.368772		178.8	0.0832494	0.0812896	0.0637562	0.0633838	0.0359183	0.0353566	0.022595	0.021963		178.8	0.252322	0.249826	0.212694	0.210292	0.162235	0.160259	0.126488	0.124177
			179	0.514345	0.510624	0.479159	0.477395	0.407599	0.409917	0.369231	0.368856		179	0.0832084	0.0813108	0.0640333	0.063403	0.036302	0.0353666	0.0228909	0.0219685		179	0.252284	0.249865	0.212646	0.210323	0.161722	0.160277	0.126009	0.124178
			179.2	0.514593	0.510678	0.479413	0.477435	0.407937	0.409963	0.369288	0.36894		179.2	0.0827964	0.081332	0.0641958	0.0634221	0.0358031	0.0353765	0.0224538	0.0219739		179.2	0.251807	0.249904	0.212587	0.210354	0.161166	0.160295	0.125761	0.124179
			179.4	0.514479	0.510732	0.479644	0.477474	0.408149	0.410009	0.369181	0.369023		179.4	0.0829457	0.0813531	0.0646598	0.0634413	0.0361228	0.0353865	0.0223782	0.0219794		179.4	0.251819	0.249942	0.212222	0.210385	0.160507	0.160313	0.125798	0.12418
			179.6	0.514973	0.510787	0.479626	0.477514	0.408444	0.410055	0.369235	0.369107		179.6	0.0831352	0.0813743	0.0645575	0.0634604	0.0362079	0.0353965	0.0220729	0.0219848		179.6	0.251857	0.249981	0.212525	0.210416	0.160427	0.160331	0.125936	0.124182
			179.8	0.515184	0.510841	0.479828	0.477554	0.408815	0.410101	0.369033	0.36919		179.8	0.082565	0.0813955	0.0642481	0.0634796	0.0360262	0.0354064	0.0217698	0.0219902		179.8	0.251891	0.25002	0.212766	0.210447	0.160626	0.160349	0.125629	0.124183
			180	0.515313	0.510895	0.480066	0.477593	0.409023	0.410147	0.369105	0.369273		180	0.0822884	0.0814166	0.0640695	0.0634987	0.0357162	0.0354164	0.0218971	0.0219957		180	0.25169	0.250058	0.212939	0.210478	0.160553	0.160367	0.125979	0.124184
			180.2	0.51554	0.510949	0.480087	0.477633	0.4094	0.410192	0.369045	0.369356		180.2	0.0826691	0.0814378	0.0641235	0.0635178	0.0353971	0.0354264	0.0216429	0.0220011		180.2	0.251606	0.250097	0.213457	0.210509	0.160407	0.160385	0.126118	0.124185
			180.4	0.515936	0.511003	0.481024	0.477673	0.410081	0.410238	0.369575	0.369438		180.4	0.0824866	0.0814589	0.0640465	0.063537	0.0349634	0.0354363	0.0215387	0.0220066		180.4	0.251772	0.250136	0.213925	0.21054	0.16062	0.160403	0.126496	0.124186
			180.6	0.516165	0.511057	0.480929	0.477712	0.409952	0.410284	0.369501	0.369521		180.6	0.0828092	0.0814801	0.0644245	0.0635561	0.0352096	0.0354463	0.0216767	0.022012		180.6	0.252088	0.250174	0.214595	0.21057	0.161125	0.160421	0.126873	0.124187
			180.8	0.515833	0.511111	0.481007	0.477752	0.409997	0.410329	0.369417	0.369603		180.8	0.0830319	0.0815012	0.0639923	0.0635752	0.0351971	0.0354562	0.0219398	0.0220175		180.8	0.252597	0.250213	0.214919	0.210601	0.162112	0.160438	0.127219	0.124189
			181	0.515774	0.511165	0.48121	0.477792	0.409923	0.410374	0.36951	0.369685		181	0.0831747	0.0815223	0.0643254	0.0635943	0.0356436	0.0354662	0.0221536	0.0220229		181	0.253094	0.250251	0.215224	0.210632	0.162522	0.160456	0.127234	0.12419
			181.2	0.515728	0.511219	0.480843	0.477831	0.410455	0.410419	0.369864	0.369767		181.2	0.0829368	0.0815434	0.0641223	0.0636134	0.0354264	0.0354762	0.0217387	0.0220284		181.2	0.253026	0.25029	0.215425	0.210663	0.162956	0.160474	0.127902	0.124191
			181.4	0.51581	0.511273	0.481062	0.477871	0.410848	0.410465	0.370496	0.369848		181.4	0.0829909	0.0815644	0.0638735	0.0636324	0.0357968	0.0354861	0.021954	0.0220338		181.4	0.253167	0.250328	0.215084	0.210693	0.163104	0.160492	0.12822	0.124192
			181.6	0.515738	0.511327	0.480672	0.47791	0.410486	0.41051	0.370333	0.369929		181.6	0.0832012	0.0815855	0.0639456	0.0636515	0.0360407	0.0354961	0.0221668	0.0220393		181.6	0.254314	0.250367	0.21512	0.210724	0.164022	0.160509	0.128843	0.124193
			181.8	0.515523	0.511381	0.480772	0.47795	0.410401	0.410555	0.370558	0.370011		181.8	0.0832753	0.0816066	0.0637902	0.0636706	0.0360923	0.035506	0.0225916	0.0220447		181.8	0.25503	0.250405	0.215343	0.210755	0.164692	0.160527	0.129275	0.124194
			182	0.516019	0.511435	0.480786	0.47799	0.410143	0.410599	0.370798	0.370091		182	0.0834466	0.0816276	0.0638313	0.0636896	0.0362508	0.035516	0.0229584	0.0220502		182	0.255115	0.250444	0.215012	0.210785	0.164801	0.160545	0.129653	0.124195
			182.2	0.516275	0.511488	0.480842	0.478029	0.409978	0.410644	0.370955	0.370172		182.2	0.0834163	0.0816487	0.0635585	0.0637087	0.0360152	0.0355259	0.0231834	0.0220556		182.2	0.255378	0.250482	0.214736	0.210816	0.164683	0.160562	0.12973	0.124196
			182.4	0.516365	0.511542	0.480702	0.478069	0.409567	0.410689	0.37103	0.370253		182.4	0.0829806	0.0816697	0.0636712	0.0637277	0.0363232	0.0355359	0.0231605	0.022061		182.4	0.255381	0.25052	0.214625	0.210847	0.164766	0.16058	0.129901	0.124197
			182.6	0.516658	0.511596	0.481097	0.478108	0.40976	0.410733	0.371143	0.370333		182.6	0.0830894	0.0816907	0.0631925	0.0637467	0.0367635	0.0355458	0.0230318	0.0220665		182.6	0.255576	0.250559	0.214082	0.210877	0.164313	0.160598	0.129558	0.124198
			182.8	0.516215	0.51165	0.480856	0.478148	0.409021	0.410778	0.371043	0.370413		182.8	0.083084	0.0817118	0.0632636	0.0637657	0.036985	0.0355557	0.0233189	0.0220719		182.8	0.255007	0.250597	0.213326	0.210908	0.163909	0.160615	0.128955	0.1242
			183	0.516168	0.511703	0.480989	0.478187	0.409005	0.410822	0.371442	0.370493		183	0.0831335	0.0817328	0.063406	0.0637847	0.0366621	0.0355657	0.0234266	0.0220774		183	0.254762	0.250635	0.213646	0.210938	0.162916	0.160633	0.128284	0.124201
			183.2	0.516716	0.511757	0.482176	0.478227	0.409375	0.410867	0.371909	0.370573		183.2	0.0830675	0.0817538	0.0638144	0.0638038	0.0365538	0.0355756	0.0233604	0.0220828		183.2	0.254136	0.250673	0.213481	0.210969	0.162266	0.16065	0.127958	0.124202
			183.4	0.517012	0.511811	0.482352	0.478266	0.4095	0.410911	0.372042	0.370652		183.4	0.0832529	0.0817747	0.0640785	0.0638227	0.0366407	0.0355856	0.0233094	0.0220883		183.4	0.253996	0.250712	0.213112	0.210999	0.161906	0.160668	0.127908	0.124203
			183.6	0.517357	0.511864	0.482345	0.478305	0.409809	0.410955	0.372546	0.370731		183.6	0.083082	0.0817957	0.0639827	0.0638417	0.0363688	0.0355955	0.0228584	0.0220937		183.6	0.253414	0.25075	0.212953	0.21103	0.161244	0.160685	0.12709	0.124204
			183.8	0.517261	0.511918	0.482422	0.478345	0.40978	0.410999	0.372769	0.370811		183.8	0.082885	0.0818167	0.0643291	0.0638607	0.0365998	0.0356054	0.0229307	0.0220991		183.8	0.252801	0.250788	0.212654	0.21106	0.160436	0.160703	0.12628	0.124205
			184	0.516629	0.511972	0.481957	0.478384	0.409582	0.411043	0.372418	0.37089		184	0.0828671	0.0818376	0.0646103	0.0638797	0.0363741	0.0356154	0.0227323	0.0221046		184	0.252556	0.250826	0.212546	0.211091	0.160132	0.16072	0.126645	0.124206
			184.2	0.51666	0.512025	0.482262	0.478424	0.409829	0.411087	0.372467	0.370968		184.2	0.083021	0.0818586	0.0646887	0.0638987	0.0363301	0.0356253	0.0224519	0.02211		184.2	0.252514	0.250864	0.213111	0.211121	0.160103	0.160738	0.12611	0.124207
			184.4	0.51665	0.512079	0.482313	0.478463	0.409728	0.411131	0.372227	0.371047		184.4	0.0829249	0.0818795	0.064496	0.0639176	0.0364132	0.0356352	0.0220352	0.0221155		184.4	0.252661	0.250902	0.213102	0.211151	0.159894	0.160755	0.125874	0.124208
			184.6	0.516574	0.512132	0.482162	0.478502	0.409509	0.411175	0.372124	0.371125		184.6	0.0832344	0.0819004	0.0646446	0.0639366	0.036269	0.0356452	0.0217456	0.0221209		184.6	0.252736	0.25094	0.213491	0.211182	0.160023	0.160773	0.125561	0.124209
			184.8	0.516438	0.512186	0.481912	0.478542	0.409622	0.411218	0.371931	0.371203		184.8	0.0830142	0.0819214	0.0650001	0.0639555	0.0362386	0.0356551	0.0220861	0.0221264		184.8	0.252578	0.250978	0.213562	0.211212	0.160152	0.16079	0.125456	0.12421
			185	0.516511	0.512239	0.482249	0.478581	0.409868	0.411262	0.371845	0.371281		185	0.0829632	0.0819423	0.0653598	0.0639744	0.0360846	0.035665	0.0213372	0.0221318		185	0.252434	0.251016	0.2132	0.211242	0.160152	0.160808	0.125034	0.124211
			185.2	0.516405	0.512293	0.481736	0.47862	0.40991	0.411305	0.371776	0.371359		185.2	0.0827315	0.0819632	0.0650225	0.0639934	0.0357257	0.0356749	0.0207843	0.0221372		185.2	0.252273	0.251054	0.212971	0.211273	0.160674	0.160825	0.125217	0.124212
			185.4	0.51577	0.512346	0.481007	0.47866	0.409641	0.411349	0.371115	0.371436		185.4	0.0831231	0.0819841	0.064967	0.0640123	0.0359067	0.0356849	0.0208472	0.0221427		185.4	0.252255	0.251092	0.212691	0.211303	0.160952	0.160842	0.124948	0.124213
			185.6	0.515254	0.512399	0.480431	0.478699	0.408957	0.411392	0.37047	0.371514		185.6	0.0828709	0.0820049	0.064667	0.0640312	0.0356654	0.0356948	0.0204862	0.0221481		185.6	0.252509	0.25113	0.212771	0.211333	0.161505	0.16086	0.12512	0.124214
			185.8	0.515376	0.512453	0.480526	0.478738	0.409187	0.411436	0.370356	0.371591		185.8	0.0825332	0.0820258	0.0638996	0.0640501	0.035144	0.0357047	0.020003	0.0221536		185.8	0.25274	0.251168	0.21312	0.211363	0.161745	0.160877	0.125637	0.124215
			186	0.515325	0.512506	0.48044	0.478778	0.409296	0.411479	0.370204	0.371668		186	0.0823953	0.0820467	0.0633656	0.064069	0.0350061	0.0357146	0.0195994	0.022159		186	0.252911	0.251206	0.21299	0.211394	0.162096	0.160894	0.125869	0.124216
			186.2	0.515346	0.512559	0.480158	0.478817	0.409401	0.411522	0.370158	0.371745		186.2	0.082413	0.0820675	0.0630884	0.0640879	0.0349434	0.0357245	0.0194075	0.0221644		186.2	0.253089	0.251244	0.213092	0.211424	0.162174	0.160911	0.12569	0.124217
			186.4	0.515271	0.512613	0.479784	0.478856	0.409048	0.411565	0.369869	0.371821		186.4	0.0827151	0.0820884	0.0629619	0.0641068	0.0349588	0.0357344	0.0193964	0.0221699		186.4	0.252927	0.251281	0.213109	0.211454	0.162369	0.160929	0.125677	0.124217
			186.6	0.515403	0.512666	0.480246	0.478895	0.409406	0.411608	0.369658	0.371898		186.6	0.0830167	0.0821092	0.06285	0.0641256	0.035477	0.0357444	0.0192845	0.0221753		186.6	0.253163	0.251319	0.213348	0.211484	0.162811	0.160946	0.126305	0.124218
			186.8	0.515408	0.512719	0.480409	0.478935	0.409206	0.411651	0.369871	0.371974		186.8	0.0829089	0.08213	0.0631584	0.0641445	0.0352316	0.0357543	0.0196063	0.0221807		186.8	0.253092	0.251357	0.213589	0.211514	0.162969	0.160963	0.126623	0.124219
			187	0.516023	0.512772	0.481206	0.478974	0.409727	0.411693	0.370574	0.37205		187	0.0828957	0.0821508	0.0632608	0.0641634	0.0351629	0.0357642	0.0201201	0.0221862		187	0.253247	0.251394	0.213628	0.211544	0.163078	0.16098	0.127093	0.12422
			187.2	0.516467	0.512825	0.481924	0.479013	0.410096	0.411736	0.370903	0.372126		187.2	0.0829724	0.0821716	0.0632217	0.0641822	0.0352177	0.0357741	0.0203481	0.0221916		187.2	0.253364	0.251432	0.213473	0.211574	0.16325	0.160997	0.127225	0.124221
			187.4	0.516517	0.512879	0.481807	0.479052	0.410406	0.411779	0.371101	0.372201		187.4	0.0828288	0.0821924	0.062849	0.0642011	0.0349945	0.035784	0.0207962	0.0221971		187.4	0.253595	0.25147	0.213551	0.211604	0.162974	0.161015	0.127198	0.124222
			187.6	0.516718	0.512932	0.482473	0.479091	0.410767	0.411821	0.371493	0.372277		187.6	0.0824882	0.0822132	0.0629864	0.0642199	0.0354704	0.0357939	0.0211969	0.0222025		187.6	0.253312	0.251507	0.213402	0.211634	0.16254	0.161032	0.126904	0.124223
			187.8	0.516599	0.512985	0.482637	0.479131	0.410841	0.411864	0.371646	0.372352		187.8	0.0827142	0.082234	0.0631462	0.0642387	0.0359735	0.0358038	0.0214259	0.0222079		187.8	0.25381	0.251545	0.214051	0.211664	0.163287	0.161049	0.12798	0.124224
			188	0.516818	0.513038	0.483029	0.47917	0.411043	0.411906	0.371854	0.372427		188	0.0824533	0.0822547	0.0630209	0.0642575	0.0355758	0.0358137	0.0217361	0.0222134		188	0.2542	0.251583	0.214781	0.211694	0.163297	0.161066	0.128743	0.124225
			188.2	0.517136	0.513091	0.483427	0.479209	0.411444	0.411949	0.372353	0.372502		188.2	0.0822623	0.0822755	0.0629635	0.0642764	0.0357772	0.0358236	0.0217654	0.0222188		188.2	0.254613	0.25162	0.215194	0.211724	0.163278	0.161083	0.128842	0.124226
			188.4	0.517455	0.513144	0.483283	0.479248	0.411634	0.411991	0.372715	0.372577		188.4	0.082617	0.0822963	0.0636073	0.0642952	0.0359366	0.0358335	0.0222685	0.0222242		188.4	0.254707	0.251658	0.215348	0.211754	0.163314	0.1611	0.129192	0.124227
			188.6	0.518152	0.513197	0.483339	0.479287	0.412231	0.412033	0.373096	0.372651		188.6	0.0822706	0.082317	0.0641839	0.064314	0.0358861	0.0358434	0.0228091	0.0222297		188.6	0.254828	0.251695	0.215873	0.211784	0.163207	0.161117	0.129388	0.124227
			188.8	0.518423	0.51325	0.483528	0.479326	0.412387	0.412075	0.373127	0.372725		188.8	0.0823358	0.0823377	0.0650442	0.0643327	0.03629	0.0358533	0.0234207	0.0222351		188.8	0.255053	0.251733	0.215798	0.211814	0.162974	0.161134	0.129442	0.124228
			189	0.518441	0.513303	0.483843	0.479365	0.412556	0.412117	0.373459	0.3728		189	0.0822324	0.0823584	0.0652729	0.0643515	0.0366262	0.0358632	0.0233564	0.0222405		189	0.255029	0.25177	0.216274	0.211844	0.163311	0.161151	0.129732	0.124229
			189.2	0.518341	0.513355	0.483435	0.479404	0.412389	0.412159	0.373527	0.372874		189.2	0.0819702	0.0823791	0.0653427	0.0643703	0.0366111	0.0358731	0.023178	0.022246		189.2	0.255584	0.251807	0.216882	0.211874	0.16365	0.161168	0.130233	0.12423
			189.4	0.517681	0.513408	0.482567	0.479443	0.411849	0.412201	0.372952	0.372947		189.4	0.0824099	0.0823999	0.0652033	0.0643891	0.0367812	0.035883	0.0233824	0.0222514		189.4	0.255443	0.251845	0.216982	0.211904	0.163488	0.161185	0.130387	0.124231
			189.6	0.517684	0.513461	0.482397	0.479482	0.41162	0.412243	0.373144	0.373021		189.6	0.0821171	0.0824205	0.0649745	0.0644078	0.0364124	0.0358929	0.0231876	0.0222569		189.6	0.255779	0.251882	0.217388	0.211934	0.163509	0.161202	0.130432	0.124232
			189.8	0.517951	0.513514	0.482248	0.479521	0.412223	0.412285	0.373357	0.373094		189.8	0.0822645	0.0824412	0.0651427	0.0644266	0.0365673	0.0359028	0.023092	0.0222623		189.8	0.25591	0.25192	0.217281	0.211963	0.163218	0.161219	0.130215	0.124232
			190	0.518072	0.513567	0.482344	0.47956	0.412393	0.412326	0.373663	0.373168		190	0.082429	0.0824619	0.0654027	0.0644453	0.0365578	0.0359127	0.0229922	0.0222677		190	0.256135	0.251957	0.217026	0.211993	0.162629	0.161236	0.130121	0.124233
			190.2	0.517995	0.51362	0.482332	0.479599	0.412166	0.412368	0.373843	0.373241		190.2	0.0824799	0.0824826	0.065463	0.0644641	0.0362739	0.0359225	0.0226536	0.0222732		190.2	0.256197	0.251994	0.217636	0.212023	0.162478	0.161253	0.130016	0.124234
			190.4	0.51793	0.513672	0.482094	0.479638	0.412301	0.412409	0.37386	0.373314		190.4	0.0823626	0.0825032	0.0652346	0.0644828	0.0363574	0.0359324	0.0223711	0.0222786		190.4	0.256256	0.252031	0.218093	0.212053	0.163111	0.16127	0.129858	0.124235
			190.6	0.518077	0.513725	0.482369	0.479677	0.412701	0.412451	0.374172	0.373386		190.6	0.0822157	0.0825239	0.0650436	0.0645016	0.0366469	0.0359423	0.0222413	0.022284		190.6	0.256309	0.252069	0.218213	0.212082	0.162818	0.161286	0.129362	0.124236
			190.8	0.517994	0.513778	0.482225	0.479716	0.412403	0.412492	0.374175	0.373459		190.8	0.0822154	0.0825445	0.0648164	0.0645203	0.0363478	0.0359522	0.022086	0.0222895		190.8	0.256723	0.252106	0.217988	0.212112	0.162747	0.161303	0.129125	0.124237
			191	0.518053	0.51383	0.481909	0.479755	0.412531	0.412534	0.374155	0.373531		191	0.0819734	0.0825651	0.0641036	0.064539	0.0364627	0.0359621	0.0220254	0.0222949		191	0.256772	0.252143	0.217539	0.212142	0.162667	0.16132	0.128479	0.124237
			191.2	0.518012	0.513883	0.481815	0.479794	0.412361	0.412575	0.37417	0.373603		191.2	0.0820027	0.0825858	0.063705	0.0645577	0.0360014	0.035972	0.0217617	0.0223003		191.2	0.256629	0.25218	0.217034	0.212171	0.162034	0.161337	0.127694	0.124238
			191.4	0.517785	0.513936	0.481939	0.479833	0.412126	0.412616	0.374004	0.373675		191.4	0.0819673	0.0826064	0.0635674	0.0645764	0.0357563	0.0359818	0.0216912	0.0223057		191.4	0.25661	0.252217	0.216568	0.212201	0.162237	0.161354	0.127977	0.124239
			191.6	0.518321	0.513988	0.482409	0.479872	0.412475	0.412657	0.37471	0.373747		191.6	0.0820507	0.082627	0.0633863	0.0645951	0.0360687	0.0359917	0.0215557	0.0223112		191.6	0.256719	0.252254	0.216523	0.21223	0.162415	0.16137	0.127928	0.12424
			191.8	0.517918	0.514041	0.48202	0.479911	0.411984	0.412698	0.374424	0.373819		191.8	0.082531	0.0826476	0.063452	0.0646138	0.0364297	0.0360016	0.0218833	0.0223166		191.8	0.256714	0.252291	0.216412	0.21226	0.16261	0.161387	0.127819	0.124241
			192	0.518254	0.514093	0.482474	0.47995	0.412111	0.412739	0.374563	0.37389		192	0.0829298	0.0826681	0.0638231	0.0646325	0.0362388	0.0360115	0.022286	0.022322		192	0.256277	0.252328	0.215607	0.21229	0.161961	0.161404	0.127434	0.124241
			192.2	0.518097	0.514146	0.482467	0.479988	0.412055	0.41278	0.374341	0.373962		192.2	0.0828026	0.0826887	0.063893	0.0646511	0.0363179	0.0360213	0.0221942	0.0223275		192.2	0.256487	0.252365	0.215355	0.212319	0.162235	0.16142	0.127094	0.124242
			192.4	0.518312	0.514198	0.482699	0.480027	0.412099	0.412821	0.374368	0.374033		192.4	0.0834478	0.0827093	0.0644755	0.0646698	0.0365434	0.0360312	0.0230542	0.0223329		192.4	0.256112	0.252402	0.21471	0.212349	0.162349	0.161437	0.126754	0.124243
			192.6	0.518075	0.514251	0.48269	0.480066	0.41196	0.412862	0.373855	0.374104		192.6	0.0832534	0.0827298	0.0644838	0.0646884	0.0366786	0.0360411	0.0231332	0.0223383		192.6	0.255801	0.252439	0.214513	0.212378	0.1618	0.161454	0.126549	0.124244
			192.8	0.51785	0.514303	0.48331	0.480105	0.411935	0.412902	0.374024	0.374175		192.8	0.0838531	0.0827504	0.0648845	0.0647071	0.0368069	0.0360509	0.0234654	0.0223438		192.8	0.255409	0.252476	0.213548	0.212408	0.161054	0.16147	0.126148	0.124244
			193	0.517979	0.514355	0.483554	0.480144	0.412185	0.412943	0.374529	0.374245		193	0.0838603	0.0827709	0.0650728	0.0647257	0.037001	0.0360608	0.023553	0.0223492		193	0.255377	0.252513	0.213714	0.212437	0.160866	0.161487	0.126375	0.124245
			193.2	0.517893	0.514408	0.483682	0.480182	0.412158	0.412983	0.374269	0.374316		193.2	0.0843083	0.0827915	0.065386	0.0647444	0.0367753	0.0360707	0.0237754	0.0223546		193.2	0.25573	0.25255	0.213929	0.212466	0.160678	0.161504	0.126522	0.124246
			193.4	0.517289	0.51446	0.483359	0.480221	0.412228	0.413024	0.373826	0.374386		193.4	0.0847587	0.082812	0.0652057	0.064763	0.0365132	0.0360805	0.0237491	0.0223601		193.4	0.255751	0.252587	0.213727	0.212496	0.161164	0.16152	0.12638	0.124247
			193.6	0.517579	0.514512	0.483579	0.48026	0.41275	0.413064	0.374199	0.374456		193.6	0.0850872	0.0828325	0.0654764	0.0647816	0.0362613	0.0360904	0.023564	0.0223655		193.6	0.255475	0.252624	0.213325	0.212525	0.161088	0.161537	0.126232	0.124247
			193.8	0.517561	0.514565	0.483923	0.480299	0.413447	0.413105	0.37441	0.374526		193.8	0.0852092	0.082853	0.0655411	0.0648002	0.0361173	0.0361002	0.0232793	0.0223709		193.8	0.255537	0.25266	0.213024	0.212555	0.160477	0.161553	0.126325	0.124248
			194	0.51793	0.514617	0.484584	0.480337	0.413903	0.413145	0.374887	0.374596		194	0.0848656	0.0828735	0.0652501	0.0648189	0.0355118	0.0361101	0.0225624	0.0223763		194	0.256028	0.252697	0.213241	0.212584	0.16087	0.16157	0.126887	0.124249
			194.2	0.517414	0.514669	0.484119	0.480376	0.413503	0.413185	0.374652	0.374665		194.2	0.0850307	0.082894	0.0650296	0.0648375	0.0350624	0.0361199	0.0220918	0.0223818		194.2	0.25614	0.252734	0.213971	0.212613	0.161308	0.161586	0.126974	0.124249
			194.4	0.517309	0.514721	0.48369	0.480415	0.413421	0.413225	0.374325	0.374735		194.4	0.0852653	0.0829145	0.0648198	0.0648561	0.0350951	0.0361298	0.0218725	0.0223872		194.4	0.256163	0.252771	0.214367	0.212643	0.162003	0.161603	0.126908	0.12425
			194.6	0.51733	0.514774	0.483333	0.480453	0.413157	0.413265	0.37448	0.374804		194.6	0.0853934	0.0829349	0.0648619	0.0648747	0.0348184	0.0361397	0.0216118	0.0223926		194.6	0.256213	0.252807	0.214595	0.212672	0.162073	0.161619	0.127297	0.124251
			194.8	0.517552	0.514826	0.483073	0.480492	0.412503	0.413306	0.374208	0.374873		194.8	0.0854661	0.0829554	0.0648586	0.0648932	0.0346059	0.0361495	0.0213854	0.022398		194.8	0.256333	0.252844	0.214067	0.212701	0.162489	0.161636	0.127853	0.124252
			195	0.518068	0.514878	0.482797	0.480531	0.412143	0.413345	0.374118	0.374942		195	0.0855744	0.0829759	0.0651546	0.0649118	0.034562	0.0361594	0.0216242	0.0224035		195	0.255854	0.252881	0.21385	0.21273	0.162672	0.161652	0.127776	0.124252
			195.2	0.518089	0.51493	0.482436	0.480569	0.411754	0.413385	0.373763	0.375011		195.2	0.0857251	0.0829963	0.0650507	0.0649304	0.0343894	0.0361692	0.0217142	0.0224089		195.2	0.255829	0.252917	0.213633	0.21276	0.162748	0.161668	0.128338	0.124253
			195.4	0.517952	0.514982	0.482191	0.480608	0.411525	0.413425	0.373691	0.37508		195.4	0.0852679	0.0830167	0.0647593	0.0649489	0.0343675	0.0361791	0.0213253	0.0224143		195.4	0.255809	0.252954	0.213387	0.212789	0.163689	0.161685	0.128807	0.124254
			195.6	0.518123	0.515034	0.481938	0.480647	0.411771	0.413465	0.37379	0.375148		195.6	0.0855488	0.0830372	0.0647815	0.0649675	0.0351374	0.0361889	0.0217813	0.0224198		195.6	0.255719	0.25299	0.213361	0.212818	0.163489	0.161701	0.128522	0.124254
			195.8	0.518103	0.515086	0.481733	0.480685	0.411414	0.413505	0.373599	0.375216		195.8	0.0857646	0.0830576	0.0652532	0.0649861	0.0356637	0.0361987	0.0225508	0.0224252		195.8	0.255649	0.253027	0.213206	0.212847	0.163715	0.161718	0.128611	0.124255
			196	0.518227	0.515138	0.482151	0.480724	0.411416	0.413544	0.373809	0.375284		196	0.0858535	0.083078	0.0654434	0.0650046	0.035876	0.0362086	0.023002	0.0224306		196	0.255644	0.253064	0.213322	0.212876	0.163944	0.161734	0.128443	0.124256
			196.2	0.518344	0.51519	0.481777	0.480762	0.411077	0.413584	0.373451	0.375352		196.2	0.0851639	0.0830984	0.0649857	0.0650231	0.036422	0.0362184	0.0233192	0.022436		196.2	0.256042	0.2531	0.213681	0.212905	0.163583	0.16175	0.127822	0.124256
			196.4	0.518261	0.515242	0.481799	0.480801	0.411284	0.413624	0.373739	0.37542		196.4	0.0855182	0.0831188	0.0653739	0.0650417	0.0368662	0.0362283	0.0238713	0.0224415		196.4	0.255666	0.253136	0.213323	0.212934	0.162988	0.161767	0.1278	0.124257
			196.6	0.518329	0.515294	0.481917	0.48084	0.411651	0.413663	0.373968	0.375488		196.6	0.0852697	0.0831392	0.0653495	0.0650602	0.0370288	0.0362381	0.0239967	0.0224469		196.6	0.255676	0.253173	0.213614	0.212963	0.162302	0.161783	0.127309	0.124258
			196.8	0.518971	0.515346	0.482552	0.480878	0.41223	0.413702	0.374888	0.375555		196.8	0.0856842	0.0831596	0.0655826	0.0650787	0.0375762	0.0362479	0.0246916	0.0224523		196.8	0.25572	0.253209	0.213362	0.212993	0.16191	0.161799	0.127167	0.124258
			197	0.51916	0.515398	0.482758	0.480917	0.41244	0.413742	0.375124	0.375623		197	0.0857845	0.0831799	0.0658833	0.0650972	0.0378051	0.0362578	0.0244626	0.0224577		197	0.256187	0.253246	0.21429	0.213022	0.16263	0.161815	0.127478	0.124259
			197.2	0.519088	0.515449	0.4828	0.480955	0.412561	0.413781	0.375306	0.37569		197.2	0.0861266	0.0832003	0.0660391	0.0651157	0.0379254	0.0362676	0.0243784	0.0224632		197.2	0.256064	0.253282	0.214857	0.213051	0.16294	0.161832	0.127855	0.12426
			197.4	0.519352	0.515501	0.482685	0.480994	0.412605	0.41382	0.375643	0.375757		197.4	0.0861908	0.0832206	0.0659967	0.0651342	0.0382318	0.0362774	0.0239278	0.0224686		197.4	0.256328	0.253318	0.215302	0.21308	0.163552	0.161848	0.127838	0.12426
			197.6	0.519911	0.515553	0.482954	0.481032	0.412438	0.413859	0.376001	0.375824		197.6	0.0862625	0.083241	0.066096	0.0651527	0.0384041	0.0362873	0.0238018	0.022474		197.6	0.256482	0.253355	0.215093	0.213108	0.163278	0.161864	0.128076	0.124261
			197.8	0.520196	0.515605	0.483218	0.481071	0.412574	0.413899	0.37625	0.37589		197.8	0.0860088	0.0832613	0.0657962	0.0651712	0.0379307	0.0362971	0.0233983	0.0224794		197.8	0.257135	0.253391	0.215549	0.213137	0.163589	0.16188	0.128629	0.124262
			198	0.520361	0.515657	0.483278	0.481109	0.412466	0.413938	0.376539	0.375957		198	0.0856018	0.0832816	0.0659964	0.0651897	0.0375622	0.0363069	0.0231417	0.0224848		198	0.257123	0.253427	0.216027	0.213166	0.164021	0.161896	0.129274	0.124262
			198.2	0.520033	0.515708	0.482552	0.481148	0.412045	0.413977	0.376446	0.376023		198.2	0.0857174	0.0833019	0.0664762	0.0652081	0.0376497	0.0363168	0.0232223	0.0224903		198.2	0.257512	0.253463	0.216503	0.213195	0.164172	0.161912	0.129377	0.124263
			198.4	0.520046	0.51576	0.482909	0.481186	0.412043	0.414016	0.376434	0.376089		198.4	0.0854805	0.0833223	0.0666255	0.0652266	0.0373694	0.0363266	0.0232201	0.0224957		198.4	0.257427	0.2535	0.217058	0.213224	0.164566	0.161929	0.129365	0.124263
			198.6	0.520193	0.515812	0.483039	0.481224	0.412192	0.414054	0.376433	0.376155		198.6	0.0851564	0.0833426	0.0672298	0.0652451	0.0367641	0.0363364	0.0231095	0.0225011		198.6	0.257502	0.253536	0.217506	0.213253	0.164669	0.161945	0.129432	0.124264
			198.8	0.520308	0.515863	0.483526	0.481263	0.412155	0.414093	0.376281	0.376221		198.8	0.085136	0.0833629	0.0673039	0.0652635	0.0365589	0.0363462	0.0235434	0.0225065		198.8	0.25749	0.253572	0.217025	0.213282	0.164506	0.161961	0.129254	0.124265
			199	0.520232	0.515915	0.483223	0.481301	0.412168	0.414132	0.375944	0.376287		199	0.0851499	0.0833831	0.0675698	0.065282	0.0365908	0.036356	0.0241036	0.022512		199	0.257365	0.253608	0.217141	0.213311	0.164731	0.161977	0.128994	0.124265
			199.2	0.51949	0.515966	0.483203	0.48134	0.412405	0.414171	0.375439	0.376353		199.2	0.0849314	0.0834034	0.066948	0.0653004	0.0367653	0.0363659	0.0240726	0.0225174		199.2	0.257305	0.253644	0.216945	0.213339	0.164569	0.161993	0.12842	0.124266
			199.4	0.519277	0.516018	0.483085	0.481378	0.412458	0.414209	0.375433	0.376418		199.4	0.0844756	0.0834237	0.0668307	0.0653188	0.0363914	0.0363757	0.0240155	0.0225228		199.4	0.25717	0.25368	0.216989	0.213368	0.164442	0.162009	0.128347	0.124267
			199.6	0.519376	0.51607	0.483014	0.481416	0.412763	0.414248	0.375576	0.376483		199.6	0.0849036	0.0834439	0.0670301	0.0653373	0.0364989	0.0363855	0.0244614	0.0225282		199.6	0.257344	0.253716	0.217232	0.213397	0.164063	0.162025	0.127639	0.124267
			199.8	0.519313	0.516121	0.483402	0.481455	0.412754	0.414286	0.375819	0.376548		199.8	0.0845516	0.0834642	0.0672402	0.0653557	0.0366417	0.0363953	0.0248066	0.0225336		199.8	0.257633	0.253752	0.217467	0.213426	0.164399	0.162041	0.127336	0.124268
			200	0.519276	0.516173	0.483756	0.481493	0.412951	0.414325	0.375491	0.376613		200	0.0844593	0.0834844	0.0669172	0.0653741	0.0368189	0.0364051	0.0250268	0.0225391		200	0.258009	0.253788	0.217837	0.213454	0.164581	0.162057	0.127191	0.124268
			200.2	0.519194	0.516224	0.483395	0.481531	0.413171	0.414363	0.375189	0.376678		200.2	0.0842929	0.0835047	0.0666197	0.0653925	0.036834	0.0364149	0.0252536	0.0225445		200.2	0.258785	0.253824	0.217959	0.213483	0.164655	0.162073	0.127158	0.124269
			200.4	0.519199	0.516275	0.483794	0.481569	0.413949	0.414402	0.375594	0.376743		200.4	0.0847263	0.0835249	0.0673039	0.0654109	0.0369942	0.0364247	0.0254024	0.0225499		200.4	0.258399	0.25386	0.217511	0.213512	0.164521	0.162089	0.127321	0.124269
			200.6	0.519149	0.516327	0.483725	0.481608	0.413955	0.41444	0.375759	0.376807		200.6	0.0848769	0.0835451	0.0671028	0.0654293	0.0372964	0.0364346	0.0255781	0.0225553		200.6	0.25837	0.253896	0.217351	0.213541	0.164632	0.162105	0.127263	0.12427
			200.8	0.519064	0.516378	0.483684	0.481646	0.414147	0.414478	0.376084	0.376872		200.8	0.0855999	0.0835653	0.0674578	0.0654477	0.0378216	0.0364444	0.0259651	0.0225607		200.8	0.257891	0.253932	0.216995	0.213569	0.164734	0.162121	0.127183	0.124271
			201	0.519107	0.51643	0.483394	0.481684	0.414189	0.414516	0.376152	0.376936		201	0.0854751	0.0835855	0.0675129	0.0654661	0.0377171	0.0364542	0.025253	0.0225662		201	0.258198	0.253968	0.216948	0.213598	0.164883	0.162136	0.127321	0.124271
			201.2	0.519338	0.516481	0.48338	0.481723	0.414006	0.414555	0.376536	0.377		201.2	0.0860106	0.0836057	0.0675463	0.0654845	0.0379212	0.036464	0.0249181	0.0225716		201.2	0.25794	0.254004	0.216793	0.213626	0.164532	0.162152	0.127366	0.124272
			201.4	0.519684	0.516532	0.483646	0.481761	0.414112	0.414593	0.376784	0.377064		201.4	0.0863247	0.0836259	0.0676833	0.0655028	0.0380793	0.0364738	0.0246634	0.022577		201.4	0.257802	0.25404	0.216758	0.213655	0.164449	0.162168	0.127644	0.124272
			201.6	0.519614	0.516583	0.483545	0.481799	0.414021	0.414631	0.376614	0.377128		201.6	0.0864283	0.0836461	0.0676996	0.0655212	0.0378605	0.0364836	0.0242663	0.0225824		201.6	0.25752	0.254075	0.216402	0.213683	0.1646	0.162184	0.128071	0.124273
			201.8	0.519607	0.516635	0.483479	0.481837	0.414283	0.414669	0.37678	0.377191		201.8	0.0861685	0.0836662	0.0676426	0.0655396	0.0373873	0.0364934	0.0236779	0.0225878		201.8	0.257431	0.254111	0.216615	0.213712	0.164768	0.1622	0.128723	0.124273
			202	0.519388	0.516686	0.483268	0.481875	0.414065	0.414707	0.377097	0.377255		202	0.0860238	0.0836864	0.0682789	0.0655579	0.0376974	0.0365032	0.0235005	0.0225932		202	0.256881	0.254147	0.216558	0.213741	0.164339	0.162216	0.129043	0.124274
			202.2	0.519098	0.516737	0.483353	0.481914	0.414189	0.414744	0.376662	0.377318		202.2	0.085617	0.0837066	0.0681418	0.0655763	0.0375271	0.036513	0.0229118	0.0225987		202.2	0.257087	0.254183	0.216432	0.213769	0.163757	0.162231	0.128775	0.124275
			202.4	0.518843	0.516788	0.48371	0.481952	0.414185	0.414782	0.376333	0.377381		202.4	0.0857183	0.0837267	0.0681181	0.0655946	0.0372738	0.0365228	0.022423	0.0226041		202.4	0.256707	0.254218	0.216204	0.213798	0.162957	0.162247	0.128645	0.124275
			202.6	0.518909	0.516839	0.48395	0.48199	0.414305	0.41482	0.375932	0.377444		202.6	0.0851879	0.0837468	0.0679042	0.0656129	0.037102	0.0365326	0.0220112	0.0226095		202.6	0.257171	0.254254	0.216174	0.213826	0.162564	0.162263	0.128657	0.124276
			202.8	0.519058	0.51689	0.484069	0.482028	0.414106	0.414858	0.376143	0.377507		202.8	0.0849925	0.083767	0.0674188	0.0656313	0.0370446	0.0365424	0.0224391	0.0226149		202.8	0.257075	0.25429	0.215757	0.213854	0.16225	0.162279	0.128319	0.124276
			203	0.519474	0.516942	0.484124	0.482066	0.41414	0.414895	0.376168	0.37757		203	0.0847993	0.0837871	0.0669933	0.0656496	0.0367152	0.0365521	0.0227785	0.0226203		203	0.256894	0.254325	0.215694	0.213883	0.161624	0.162294	0.127924	0.124277
			203.2	0.519103	0.516993	0.48436	0.482104	0.41397	0.414933	0.375524	0.377632		203.2	0.0844763	0.0838072	0.0664136	0.0656679	0.0365282	0.0365619	0.0225625	0.0226257		203.2	0.256672	0.254361	0.215466	0.213911	0.160814	0.16231	0.12751	0.124277
			203.4	0.519139	0.517044	0.484353	0.482142	0.413883	0.414971	0.375791	0.377695		203.4	0.0842672	0.0838273	0.0659273	0.0656862	0.0360811	0.0365717	0.0220791	0.0226312		203.4	0.256468	0.254396	0.21572	0.21394	0.160424	0.162326	0.127251	0.124278
			203.6	0.51947	0.517095	0.485108	0.48218	0.414276	0.415008	0.375953	0.377757		203.6	0.0842188	0.0838474	0.0658126	0.0657045	0.0359062	0.0365815	0.0219184	0.0226366		203.6	0.257073	0.254432	0.215949	0.213968	0.160707	0.162341	0.126592	0.124278
			203.8	0.519945	0.517146	0.485802	0.482218	0.41429	0.415045	0.375992	0.377819		203.8	0.0840509	0.0838675	0.0657553	0.0657228	0.0362625	0.0365913	0.0220544	0.022642		203.8	0.257334	0.254468	0.216167	0.213996	0.161466	0.162357	0.126782	0.124279
			204	0.520392	0.517197	0.485905	0.482256	0.414214	0.415083	0.375643	0.377881		204	0.0841364	0.0838876	0.0653507	0.0657411	0.0363003	0.0366011	0.0223956	0.0226474		204	0.257568	0.254503	0.216329	0.214025	0.161468	0.162373	0.127276	0.124279
			204.2	0.520764	0.517248	0.486059	0.482295	0.414194	0.41512	0.375952	0.377943		204.2	0.0839039	0.0839076	0.0652738	0.0657594	0.0364836	0.0366109	0.022465	0.0226528		204.2	0.257654	0.254538	0.216184	0.214053	0.161751	0.162388	0.127404	0.12428
			204.4	0.52127	0.517298	0.486303	0.482333	0.414577	0.415158	0.376464	0.378005		204.4	0.0840597	0.0839277	0.0653405	0.0657777	0.0366412	0.0366206	0.0226515	0.0226582		204.4	0.256907	0.254574	0.215302	0.214081	0.161037	0.162404	0.126535	0.12428
			204.6	0.521424	0.517349	0.486293	0.482371	0.41427	0.415195	0.377039	0.378066		204.6	0.0835004	0.0839478	0.0650139	0.065796	0.0362508	0.0366304	0.0228246	0.0226637		204.6	0.257145	0.254609	0.215111	0.214109	0.161098	0.162419	0.126551	0.124281
			204.8	0.522017	0.5174	0.486716	0.482409	0.414909	0.415232	0.377798	0.378128		204.8	0.0837332	0.0839678	0.0652604	0.0658142	0.0361844	0.0366402	0.022889	0.0226691		204.8	0.257688	0.254645	0.215482	0.214138	0.161849	0.162435	0.126686	0.124281
			205	0.52233	0.517451	0.486854	0.482447	0.415069	0.415269	0.378548	0.378189		205	0.083716	0.0839878	0.0655345	0.0658325	0.0358112	0.03665	0.0228771	0.0226745		205	0.258128	0.25468	0.216063	0.214166	0.162196	0.16245	0.127081	0.124282
			205.2	0.522457	0.517502	0.487304	0.482485	0.415372	0.415306	0.379347	0.37825		205.2	0.0843008	0.0840079	0.065794	0.0658507	0.0358831	0.0366598	0.0231567	0.0226799		205.2	0.257496	0.254715	0.215858	0.214194	0.162485	0.162466	0.127025	0.124282
			205.4	0.522821	0.517553	0.487832	0.482522	0.416377	0.415343	0.380137	0.378311		205.4	0.0844018	0.0840279	0.0664102	0.065869	0.0362994	0.0366695	0.0234069	0.0226853		205.4	0.257441	0.254751	0.216129	0.214222	0.163024	0.162481	0.127556	0.124283
			205.6	0.52299	0.517603	0.487687	0.48256	0.416611	0.41538	0.380217	0.378372		205.6	0.0844764	0.0840479	0.0670622	0.0658872	0.0367224	0.0366793	0.023475	0.0226907		205.6	0.257529	0.254786	0.216403	0.21425	0.163687	0.162497	0.127558	0.124283
			205.8	0.522926	0.517654	0.487412	0.482598	0.416548	0.415417	0.380476	0.378433		205.8	0.0845026	0.0840679	0.0673945	0.0659055	0.03727	0.0366891	0.0235168	0.0226961		205.8	0.257312	0.254821	0.216395	0.214278	0.163357	0.162512	0.127487	0.124284
			206	0.522537	0.517705	0.487254	0.482636	0.416479	0.415454	0.380745	0.378493		206	0.0844165	0.0840879	0.0676191	0.0659237	0.0379313	0.0366988	0.0236293	0.0227015		206	0.25706	0.254857	0.21592	0.214307	0.163145	0.162528	0.127383	0.124284
			206.2	0.52257	0.517756	0.487619	0.482674	0.416551	0.415491	0.380864	0.378554		206.2	0.0844507	0.0841079	0.0672042	0.0659419	0.0379607	0.0367086	0.0234157	0.022707		206.2	0.257638	0.254892	0.215792	0.214335	0.162879	0.162543	0.127403	0.124285
			206.4	0.522349	0.517806	0.487232	0.482712	0.416586	0.415528	0.381285	0.378614		206.4	0.0851676	0.0841279	0.0678246	0.0659602	0.0387165	0.0367184	0.0237347	0.0227124		206.4	0.257618	0.254927	0.215213	0.214363	0.162224	0.162559	0.127327	0.124285
			206.6	0.522601	0.517857	0.487198	0.48275	0.416632	0.415564	0.381469	0.378674		206.6	0.0849964	0.0841479	0.0679916	0.0659784	0.0388213	0.0367281	0.0238932	0.0227178		206.6	0.257863	0.254962	0.2152	0.214391	0.161973	0.162574	0.12709	0.124286
			206.8	0.522489	0.517907	0.487007	0.482788	0.416362	0.415601	0.381347	0.378734		206.8	0.0849187	0.0841679	0.068291	0.0659966	0.0386215	0.0367379	0.023826	0.0227232		206.8	0.257627	0.254997	0.215172	0.214419	0.161948	0.162589	0.127102	0.124286
			207	0.521927	0.517958	0.48659	0.482826	0.416177	0.415638	0.380772	0.378794		207	0.0849587	0.0841878	0.068166	0.0660148	0.0389191	0.0367477	0.0240488	0.0227286		207	0.257258	0.255032	0.215	0.214447	0.161055	0.162605	0.127121	0.124287
			207.2	0.52155	0.518009	0.486632	0.482864	0.415966	0.415674	0.38009	0.378854		207.2	0.0851978	0.0842078	0.0679642	0.066033	0.0391869	0.0367574	0.0238524	0.022734		207.2	0.257008	0.255068	0.214899	0.214475	0.160495	0.16262	0.126845	0.124287
			207.4	0.52153	0.518059	0.486695	0.482901	0.41599	0.415711	0.379948	0.378913		207.4	0.0854804	0.0842277	0.0680105	0.0660512	0.0389618	0.0367672	0.0234261	0.0227394		207.4	0.2567	0.255103	0.214802	0.214503	0.160376	0.162635	0.126402	0.124287
			207.6	0.52193	0.51811	0.487155	0.482939	0.416175	0.415747	0.37966	0.378973		207.6	0.0859558	0.0842477	0.0681062	0.0660694	0.0391002	0.0367769	0.0233699	0.0227448		207.6	0.257382	0.255138	0.21528	0.214531	0.160632	0.162651	0.126479	0.124288
			207.8	0.522378	0.51816	0.486959	0.482977	0.41613	0.415784	0.379541	0.379032		207.8	0.08602	0.0842676	0.0678676	0.0660875	0.0392256	0.0367867	0.0233319	0.0227502		207.8	0.256683	0.255173	0.215169	0.214559	0.160118	0.162666	0.126232	0.124288
			208	0.522175	0.518211	0.486511	0.483015	0.415661	0.41582	0.378766	0.379091		208	0.0860242	0.0842875	0.0675497	0.0661057	0.0391061	0.0367965	0.0232505	0.0227556		208	0.256629	0.255208	0.215296	0.214587	0.160375	0.162681	0.126378	0.124289
			208.2	0.522228	0.518261	0.486568	0.483053	0.416138	0.415857	0.378964	0.37915		208.2	0.086015	0.0843074	0.0670467	0.0661239	0.0386915	0.0368062	0.0228386	0.0227611		208.2	0.25673	0.255243	0.215815	0.214614	0.160712	0.162696	0.126511	0.124289
			208.4	0.522017	0.518311	0.486071	0.48309	0.415924	0.415893	0.379004	0.379209		208.4	0.0862056	0.0843273	0.0670237	0.0661421	0.0386113	0.036816	0.0230706	0.0227665		208.4	0.256662	0.255278	0.216102	0.214642	0.160738	0.162712	0.126261	0.12429
			208.6	0.52219	0.518362	0.485914	0.483128	0.415825	0.415929	0.379088	0.379268		208.6	0.0862412	0.0843472	0.0670337	0.0661602	0.0386468	0.0368257	0.0230526	0.0227719		208.6	0.257178	0.255313	0.21664	0.21467	0.161386	0.162727	0.126744	0.12429
			208.8	0.522117	0.518412	0.485806	0.483166	0.415918	0.415965	0.379069	0.379327		208.8	0.0870335	0.0843671	0.0675432	0.0661784	0.0390723	0.0368355	0.0231037	0.0227773		208.8	0.25743	0.255347	0.216826	0.214698	0.162194	0.162742	0.126907	0.124291
			209	0.521728	0.518462	0.485394	0.483203	0.415701	0.416002	0.378995	0.379385		209	0.0874851	0.084387	0.0683039	0.0661965	0.0391917	0.0368452	0.023464	0.0227827		209	0.257136	0.255382	0.216756	0.214726	0.162007	0.162757	0.126643	0.124291
			209.2	0.521737	0.518513	0.485082	0.483241	0.415619	0.416038	0.378825	0.379444		209.2	0.0875685	0.0844069	0.0681619	0.0662146	0.0391588	0.036855	0.0230581	0.0227881		209.2	0.257318	0.255417	0.216371	0.214754	0.162592	0.162772	0.126712	0.124291
			209.4	0.522192	0.518563	0.485057	0.483279	0.415924	0.416074	0.378711	0.379502		209.4	0.0875311	0.0844268	0.0682101	0.0662328	0.0394052	0.0368647	0.0230422	0.0227935		209.4	0.257395	0.255452	0.216547	0.214781	0.162475	0.162788	0.126582	0.124292
			209.6	0.522546	0.518613	0.484807	0.483317	0.415616	0.41611	0.378381	0.37956		209.6	0.0875161	0.0844466	0.068498	0.0662509	0.0393518	0.0368744	0.0231352	0.0227989		209.6	0.257999	0.255487	0.216746	0.214809	0.162691	0.162803	0.127039	0.124292
			209.8	0.522569	0.518664	0.484839	0.483354	0.415364	0.416146	0.378388	0.379618		209.8	0.0872791	0.0844665	0.0681309	0.066269	0.0392293	0.0368842	0.0231016	0.0228043		209.8	0.257884	0.255522	0.216651	0.214837	0.162157	0.162818	0.127036	0.124293
			210	0.522242	0.518714	0.484789	0.483392	0.415433	0.416182	0.378659	0.379676		210	0.0869237	0.0844863	0.0677772	0.0662872	0.0391036	0.0368939	0.0229	0.0228097		210	0.258074	0.255556	0.215884	0.214865	0.162101	0.162833	0.127111	0.124293
			210.2	0.522695	0.518764	0.485339	0.48343	0.415501	0.416218	0.379012	0.379734		210.2	0.0870475	0.0845062	0.0676783	0.0663053	0.0389631	0.0369037	0.023345	0.0228151		210.2	0.258397	0.255591	0.215447	0.214892	0.161587	0.162848	0.127053	0.124294
			210.4	0.522433	0.518814	0.485221	0.483467	0.41541	0.416254	0.37927	0.379791		210.4	0.0870942	0.084526	0.0680943	0.0663234	0.039005	0.0369134	0.0235886	0.0228205		210.4	0.258324	0.255626	0.214981	0.21492	0.161064	0.162863	0.127276	0.124294
			210.6	0.522893	0.518864	0.485542	0.483505	0.415221	0.416289	0.379102	0.379849		210.6	0.086648	0.0845458	0.0679213	0.0663415	0.0384834	0.0369231	0.0234661	0.0228259		210.6	0.258702	0.255661	0.214831	0.214948	0.160909	0.162878	0.127262	0.124294
			210.8	0.522569	0.518914	0.485911	0.483542	0.414928	0.416325	0.378618	0.379906		210.8	0.0859879	0.0845656	0.0679777	0.0663596	0.038178	0.0369329	0.0234199	0.0228314		210.8	0.258814	0.255695	0.214719	0.214975	0.160514	0.162893	0.127304	0.124295
			211	0.522552	0.518964	0.486307	0.48358	0.414703	0.416361	0.378615	0.379964		211	0.0859268	0.0845854	0.0675458	0.0663777	0.0380148	0.0369426	0.0238697	0.0228368		211	0.258565	0.25573	0.214455	0.215003	0.159849	0.162908	0.127172	0.124295
			211.2	0.523301	0.519014	0.48738	0.483618	0.415109	0.416397	0.379026	0.380021		211.2	0.0854628	0.0846052	0.0673213	0.0663957	0.0373486	0.0369523	0.023809	0.0228422		211.2	0.258766	0.255764	0.214965	0.215031	0.16033	0.162923	0.127158	0.124296
			211.4	0.52361	0.519064	0.48805	0.483655	0.415511	0.416432	0.379291	0.380078		211.4	0.0854014	0.084625	0.0670719	0.0664138	0.0369631	0.0369621	0.0236039	0.0228476		211.4	0.258848	0.255799	0.215313	0.215058	0.160475	0.162938	0.126771	0.124296
			211.6	0.524126	0.519114	0.488817	0.483693	0.415704	0.416468	0.37954	0.380135		211.6	0.085715	0.0846448	0.0668407	0.0664319	0.0371164	0.0369718	0.0240084	0.022853		211.6	0.258828	0.255834	0.216209	0.215086	0.160972	0.162953	0.126629	0.124296
			211.8	0.524167	0.519164	0.488415	0.48373	0.415404	0.416503	0.379368	0.380191		211.8	0.0856577	0.0846646	0.0662627	0.06645	0.0368578	0.0369815	0.0238678	0.0228584		211.8	0.258788	0.255868	0.216852	0.215113	0.161283	0.162968	0.126826	0.124297
			212	0.523647	0.519214	0.48837	0.483768	0.415039	0.416539	0.379048	0.380248		212	0.085824	0.0846844	0.0661992	0.066468	0.0370973	0.0369913	0.0239533	0.0228638		212	0.259135	0.255903	0.217449	0.215141	0.162401	0.162983	0.127114	0.124297
			212.2	0.523648	0.519264	0.488398	0.483805	0.415324	0.416574	0.379138	0.380304		212.2	0.0860874	0.0847041	0.0659324	0.0664861	0.0370821	0.037001	0.0241011	0.0228692		212.2	0.258731	0.255937	0.218072	0.215168	0.162436	0.162998	0.127159	0.124298
			212.4	0.523275	0.519314	0.488085	0.483843	0.414949	0.41661	0.379214	0.380361		212.4	0.0862876	0.0847239	0.0663906	0.0665041	0.0375852	0.0370107	0.0245581	0.0228746		212.4	0.258531	0.255972	0.217847	0.215196	0.162785	0.163013	0.127096	0.124298
			212.6	0.523723	0.519364	0.488241	0.48388	0.415342	0.416645	0.379778	0.380417		212.6	0.0868906	0.0847436	0.0670618	0.0665222	0.0379854	0.0370204	0.0248708	0.02288		212.6	0.258724	0.256006	0.217877	0.215223	0.163164	0.163028	0.126897	0.124298
			212.8	0.523209	0.519414	0.488005	0.483918	0.415183	0.416681	0.379835	0.380473		212.8	0.0873253	0.0847634	0.0681326	0.0665402	0.0381093	0.0370301	0.0250366	0.0228854		212.8	0.259079	0.25604	0.217772	0.215251	0.163778	0.163043	0.127056	0.124299
			213	0.522948	0.519464	0.487954	0.483955	0.41517	0.416716	0.37977	0.380529		213	0.0877127	0.0847831	0.0686773	0.0665583	0.0380438	0.0370399	0.0248299	0.0228908		213	0.259181	0.256075	0.218081	0.215278	0.164083	0.163057	0.127225	0.124299
			213.2	0.522782	0.519514	0.487645	0.483993	0.41512	0.416751	0.379566	0.380585		213.2	0.0876892	0.0848028	0.0686418	0.0665763	0.0379012	0.0370496	0.0243181	0.0228962		213.2	0.259433	0.256109	0.218515	0.215305	0.164757	0.163072	0.127647	0.124299
			213.4	0.522944	0.519563	0.487591	0.48403	0.415659	0.416786	0.3797	0.38064		213.4	0.088141	0.0848225	0.0688404	0.0665943	0.0380771	0.0370593	0.0244935	0.0229016		213.4	0.259002	0.256144	0.218236	0.215333	0.163964	0.163087	0.127315	0.1243
			213.6	0.523058	0.519613	0.487433	0.484067	0.416157	0.416822	0.379651	0.380696		213.6	0.0882693	0.0848422	0.0690902	0.0666123	0.0380684	0.037069	0.0240766	0.022907		213.6	0.259361	0.256178	0.218607	0.21536	0.163919	0.163102	0.127536	0.1243
			213.8	0.522959	0.519663	0.487442	0.484105	0.416475	0.416857	0.379775	0.380752		213.8	0.0878284	0.0848619	0.0687266	0.0666303	0.0382552	0.0370787	0.0236889	0.0229124		213.8	0.258464	0.256212	0.217876	0.215387	0.162842	0.163117	0.126582	0.124301
			214	0.522319	0.519713	0.487047	0.484142	0.416638	0.416892	0.379498	0.380807		214	0.0873994	0.0848816	0.0685837	0.0666483	0.038384	0.0370884	0.0233468	0.0229178		214	0.258514	0.256246	0.217521	0.215415	0.16308	0.163131	0.126565	0.124301
			214.2	0.522723	0.519762	0.487399	0.48418	0.41712	0.416927	0.379907	0.380862		214.2	0.0873071	0.0849013	0.0684178	0.0666663	0.0385156	0.0370982	0.0236306	0.0229232		214.2	0.259064	0.256281	0.217752	0.215442	0.163148	0.163146	0.126914	0.124301
			214.4	0.522973	0.519812	0.487539	0.484217	0.416992	0.416962	0.38018	0.380917		214.4	0.0871211	0.084921	0.0686236	0.0666843	0.0385011	0.0371079	0.0233638	0.0229286		214.4	0.259096	0.256315	0.217643	0.215469	0.163143	0.163161	0.12719	0.124302
			214.6	0.523452	0.519861	0.487872	0.484254	0.417586	0.416997	0.380576	0.380972		214.6	0.0863274	0.0849407	0.0684384	0.0667023	0.0381015	0.0371176	0.0228638	0.022934		214.6	0.259258	0.256349	0.217457	0.215497	0.162751	0.163176	0.126767	0.124302
			214.8	0.523558	0.519911	0.488149	0.484292	0.41753	0.417032	0.380814	0.381027		214.8	0.0858153	0.0849604	0.0683437	0.0667203	0.0380243	0.0371273	0.0226895	0.0229394		214.8	0.258853	0.256383	0.217391	0.215524	0.162198	0.16319	0.12627	0.124302
			215	0.523924	0.519961	0.488277	0.484329	0.417505	0.417067	0.381315	0.381082		215	0.085517	0.08498	0.0679157	0.0667383	0.0378075	0.037137	0.022534	0.0229448		215	0.258491	0.256418	0.217173	0.215551	0.162233	0.163205	0.125996	0.124303
			215.2	0.524276	0.52001	0.488761	0.484366	0.417631	0.417102	0.381617	0.381136		215.2	0.0850711	0.0849997	0.067733	0.0667563	0.0372419	0.0371467	0.0223548	0.0229502		215.2	0.258566	0.256452	0.217381	0.215578	0.162436	0.16322	0.125971	0.124303
			215.4	0.524955	0.52006	0.489039	0.484404	0.417986	0.417136	0.381983	0.381191		215.4	0.0850519	0.0850193	0.0673046	0.0667742	0.0368679	0.0371564	0.0222997	0.0229556		215.4	0.25877	0.256486	0.217383	0.215606	0.162066	0.163234	0.125769	0.124303
			215.6	0.524761	0.520109	0.488573	0.484441	0.417534	0.417171	0.381767	0.381245		215.6	0.0852242	0.0850389	0.067455	0.0667922	0.036721	0.0371661	0.0227595	0.022961		215.6	0.258938	0.25652	0.217788	0.215633	0.162354	0.163249	0.126167	0.124304
			215.8	0.524647	0.520159	0.488139	0.484478	0.41754	0.417206	0.381898	0.3813		215.8	0.0849019	0.0850586	0.0675128	0.0668102	0.0367061	0.0371758	0.0226231	0.0229664		215.8	0.259145	0.256554	0.218057	0.21566	0.162323	0.163263	0.126589	0.124304
			216	0.524697	0.520208	0.488278	0.484515	0.417827	0.417241	0.382319	0.381354		216	0.0848013	0.0850782	0.0679353	0.0668281	0.0371311	0.0371855	0.023215	0.0229718		216	0.259154	0.256588	0.217714	0.215687	0.16223	0.163278	0.126924	0.124304
			216.2	0.524757	0.520258	0.488276	0.484553	0.417874	0.417275	0.382602	0.381408		216.2	0.0850709	0.0850978	0.068113	0.0668461	0.0372769	0.0371952	0.0237983	0.0229772		216.2	0.258691	0.256622	0.217065	0.215714	0.161884	0.163293	0.126485	0.124305
			216.4	0.524744	0.520307	0.488285	0.48459	0.417845	0.41731	0.38276	0.381462		216.4	0.0852943	0.0851174	0.0688723	0.066864	0.037679	0.0372049	0.0240943	0.0229826		216.4	0.258953	0.256656	0.216723	0.215741	0.162233	0.163307	0.126806	0.124305
			216.6	0.525295	0.520356	0.488561	0.484627	0.418185	0.417344	0.383247	0.381516		216.6	0.0856062	0.085137	0.0695175	0.0668819	0.0379531	0.0372146	0.0245125	0.022988		216.6	0.258953	0.25669	0.216693	0.215768	0.162479	0.163322	0.126727	0.124305
			216.8	0.524585	0.520406	0.488443	0.484664	0.417927	0.417379	0.382712	0.381569		216.8	0.0857522	0.0851566	0.0697145	0.0668999	0.0377287	0.0372243	0.0241185	0.0229934		216.8	0.25919	0.256724	0.216654	0.215795	0.162891	0.163336	0.127154	0.124306
			217	0.524274	0.520455	0.48873	0.484701	0.417753	0.417414	0.382364	0.381623		217	0.0859756	0.0851762	0.0697196	0.0669178	0.0380439	0.037234	0.023853	0.0229988		217	0.258716	0.256758	0.216397	0.215822	0.162837	0.163351	0.126834	0.124306
			217.2	0.523789	0.520504	0.488393	0.484739	0.417599	0.417448	0.381973	0.381676		217.2	0.0859363	0.0851958	0.0694109	0.0669357	0.0382269	0.0372436	0.0237178	0.0230042		217.2	0.258094	0.256792	0.216432	0.215849	0.162876	0.163365	0.126377	0.124306
			217.4	0.523785	0.520554	0.488434	0.484776	0.41772	0.417482	0.38191	0.38173		217.4	0.0863315	0.0852153	0.0689234	0.0669536	0.0383386	0.0372533	0.0236848	0.0230096		217.4	0.257712	0.256826	0.216375	0.215876	0.162465	0.16338	0.125955	0.124307
			217.6	0.523501	0.520603	0.488189	0.484813	0.417595	0.417517	0.381273	0.381783		217.6	0.0861382	0.0852349	0.068588	0.0669715	0.0386136	0.037263	0.0233384	0.023015		217.6	0.257267	0.256859	0.216828	0.215903	0.162507	0.163394	0.125473	0.124307
			217.8	0.523407	0.520652	0.488374	0.48485	0.417246	0.417551	0.381143	0.381836		217.8	0.0857946	0.0852544	0.0682548	0.0669895	0.0385173	0.0372727	0.0230977	0.0230204		217.8	0.257276	0.256893	0.216549	0.21593	0.162429	0.163409	0.125499	0.124307
			218	0.523026	0.520701	0.488551	0.484887	0.416996	0.417586	0.380837	0.381889		218	0.0861881	0.085274	0.0680534	0.0670074	0.0387799	0.0372824	0.022951	0.0230258		218	0.258116	0.256927	0.217033	0.215957	0.163119	0.163423	0.126242	0.124308
			218.2	0.523643	0.520751	0.489186	0.484924	0.417286	0.41762	0.381493	0.381942		218.2	0.0863867	0.0852935	0.0673175	0.0670252	0.03845	0.0372921	0.0227062	0.0230312		218.2	0.258473	0.256961	0.217346	0.215984	0.163111	0.163438	0.126388	0.124308
			218.4	0.523537	0.5208	0.489118	0.484961	0.416645	0.417654	0.381144	0.381994		218.4	0.0863307	0.0853131	0.0671301	0.0670431	0.0382011	0.0373018	0.0225659	0.0230366		218.4	0.258429	0.256995	0.217219	0.216011	0.163193	0.163452	0.12632	0.124308
			218.6	0.523486	0.520849	0.488554	0.484999	0.416846	0.417688	0.381012	0.382047		218.6	0.0862924	0.0853326	0.0669639	0.067061	0.0379571	0.0373114	0.0227075	0.023042		218.6	0.25869	0.257028	0.21758	0.216038	0.163314	0.163466	0.126493	0.124309
			218.8	0.523117	0.520898	0.488184	0.485036	0.416336	0.417722	0.380926	0.3821		218.8	0.086622	0.0853521	0.0672524	0.0670789	0.0382244	0.0373211	0.0232991	0.0230474		218.8	0.258817	0.257062	0.2174	0.216065	0.163071	0.163481	0.126452	0.124309
			219	0.522875	0.520947	0.487864	0.485073	0.41627	0.417757	0.380864	0.382152		219	0.087114	0.0853716	0.0675643	0.0670968	0.0383714	0.0373308	0.0235255	0.0230528		219	0.259382	0.257096	0.217608	0.216092	0.163566	0.163495	0.126846	0.124309
			219.2	0.522671	0.520996	0.487457	0.48511	0.416471	0.417791	0.380797	0.382204		219.2	0.0871902	0.0853911	0.0679034	0.0671146	0.0380488	0.0373405	0.023831	0.0230582		219.2	0.259877	0.257129	0.217886	0.216119	0.162948	0.163509	0.12703	0.12431
			219.4	0.522513	0.521045	0.486905	0.485147	0.416964	0.417825	0.380359	0.382256		219.4	0.0875097	0.0854106	0.0684802	0.0671325	0.0382975	0.0373501	0.0244895	0.0230635		219.4	0.260257	0.257163	0.218275	0.216145	0.163039	0.163524	0.127306	0.12431
			219.6	0.522087	0.521094	0.486501	0.485184	0.416611	0.417859	0.379969	0.382309		219.6	0.0876727	0.0854301	0.0686242	0.0671504	0.0382776	0.0373598	0.0245414	0.0230689		219.6	0.260575	0.257197	0.218768	0.216172	0.163245	0.163538	0.127607	0.12431
			219.8	0.522111	0.521143	0.486348	0.485221	0.41705	0.417893	0.38003	0.38236		219.8	0.087798	0.0854496	0.0690356	0.0671682	0.0388616	0.0373695	0.0246989	0.0230743		219.8	0.260533	0.25723	0.218572	0.216199	0.162586	0.163552	0.127644	0.12431
			220	0.522166	0.521192	0.48598	0.485258	0.417081	0.417927	0.380038	0.382412		220	0.0880339	0.0854691	0.0691846	0.0671861	0.0392127	0.0373791	0.0250059	0.0230797		220	0.260876	0.257264	0.218016	0.216226	0.162303	0.163567	0.127854	0.124311
			220.2	0.522195	0.521241	0.486014	0.485295	0.417199	0.417961	0.380059	0.382464		220.2	0.0881744	0.0854885	0.0694601	0.0672039	0.0395333	0.0373888	0.0251952	0.0230851		220.2	0.260636	0.257297	0.217589	0.216252	0.162072	0.163581	0.127505	0.124311
			220.4	0.522394	0.52129	0.485681	0.485332	0.417535	0.417994	0.379929	0.382516		220.4	0.0880918	0.085508	0.069391	0.0672217	0.0392927	0.0373985	0.0249887	0.0230905		220.4	0.260918	0.257331	0.217957	0.216279	0.162553	0.163595	0.127646	0.124311
			220.6	0.522087	0.521339	0.485546	0.485369	0.417526	0.418028	0.379815	0.382567		220.6	0.0877725	0.0855275	0.0691048	0.0672396	0.0389654	0.0374081	0.0248404	0.0230959		220.6	0.260422	0.257364	0.218152	0.216306	0.162375	0.163609	0.127365	0.124312
			220.8	0.522039	0.521388	0.485621	0.485406	0.417642	0.418062	0.379707	0.382619		220.8	0.0877033	0.0855469	0.0689762	0.0672574	0.0388198	0.0374178	0.0241469	0.0231013		220.8	0.260311	0.257398	0.218556	0.216332	0.162865	0.163624	0.127657	0.124312
			221	0.522237	0.521436	0.485978	0.485443	0.417757	0.418096	0.379756	0.38267		221	0.0875125	0.0855663	0.0690643	0.0672752	0.039157	0.0374275	0.0240977	0.0231067		221	0.259949	0.257431	0.21857	0.216359	0.163102	0.163638	0.12701	0.124312
			221.2	0.522048	0.521485	0.485968	0.48548	0.417896	0.41813	0.380078	0.382721		221.2	0.0872488	0.0855858	0.0685642	0.067293	0.0391548	0.0374371	0.0244282	0.0231121		221.2	0.259877	0.257465	0.218981	0.216386	0.163387	0.163652	0.126918	0.124312
			221.4	0.522331	0.521534	0.485986	0.485516	0.417987	0.418163	0.380443	0.382772		221.4	0.0874044	0.0856052	0.0684966	0.0673108	0.0389196	0.0374468	0.0244055	0.0231175		221.4	0.259822	0.257498	0.218883	0.216412	0.163348	0.163666	0.126904	0.124313
			221.6	0.522536	0.521583	0.486055	0.485553	0.417881	0.418197	0.380925	0.382823		221.6	0.0873316	0.0856246	0.068188	0.0673287	0.0388867	0.0374565	0.0242683	0.0231229		221.6	0.259908	0.257532	0.218814	0.216439	0.163212	0.16368	0.126927	0.124313
			221.8	0.522838	0.521632	0.486658	0.48559	0.417998	0.418231	0.381419	0.382874		221.8	0.0870428	0.085644	0.0680555	0.0673465	0.0383278	0.0374661	0.0241548	0.0231283		221.8	0.260824	0.257565	0.218998	0.216466	0.163381	0.163694	0.127237	0.124313
			222	0.522663	0.52168	0.48659	0.485627	0.417934	0.418264	0.381474	0.382925		222	0.0871858	0.0856634	0.0679196	0.0673643	0.0385864	0.0374758	0.0245213	0.0231337		222	0.261022	0.257598	0.219176	0.216492	0.163203	0.163708	0.127054	0.124314
			222.2	0.523087	0.521729	0.48666	0.485664	0.418019	0.418298	0.381876	0.382975		222.2	0.0865733	0.0856828	0.0672782	0.067382	0.037858	0.0374854	0.0244977	0.023139		222.2	0.261007	0.257632	0.219646	0.216519	0.163353	0.163723	0.126987	0.124314
			222.4	0.522883	0.521778	0.48643	0.485701	0.417705	0.418331	0.381563	0.383026		222.4	0.0863712	0.0857022	0.0670887	0.0673998	0.0375777	0.0374951	0.0246056	0.0231444		222.4	0.261025	0.257665	0.219902	0.216545	0.163322	0.163737	0.126922	0.124314
			222.6	0.523079	0.521826	0.486415	0.485738	0.417799	0.418365	0.381598	0.383076		222.6	0.0858528	0.0857216	0.0668532	0.0674176	0.0371248	0.0375047	0.0244176	0.0231498		222.6	0.26103	0.257698	0.21995	0.216572	0.163565	0.163751	0.127091	0.124314
			222.8	0.523113	0.521875	0.487014	0.485774	0.417634	0.418398	0.381974	0.383127		222.8	0.0858939	0.085741	0.0668425	0.0674354	0.037381	0.0375144	0.024306	0.0231552		222.8	0.261387	0.257731	0.219508	0.216598	0.163786	0.163765	0.127418	0.124315
			223	0.52352	0.521924	0.48709	0.485811	0.417921	0.418432	0.381962	0.383177		223	0.086187	0.0857603	0.0669371	0.0674532	0.0374903	0.037524	0.024048	0.0231606		223	0.261417	0.257765	0.219735	0.216625	0.163777	0.163779	0.127322	0.124315
			223.2	0.5238	0.521972	0.487068	0.485848	0.41819	0.418465	0.382297	0.383227		223.2	0.0861352	0.0857797	0.0670512	0.0674709	0.037564	0.0375337	0.0239258	0.023166		223.2	0.261172	0.257798	0.219184	0.216651	0.163081	0.163793	0.12669	0.124315
			223.4	0.523931	0.522021	0.487521	0.485885	0.418218	0.418499	0.382102	0.383277		223.4	0.0865429	0.0857991	0.0672612	0.0674887	0.0379292	0.0375433	0.023858	0.0231714		223.4	0.261417	0.257831	0.21916	0.216677	0.163502	0.163807	0.127231	0.124315
			223.6	0.5243	0.522069	0.488339	0.485922	0.418484	0.418532	0.382898	0.383327		223.6	0.0865062	0.0858184	0.0673925	0.0675064	0.0375713	0.037553	0.023278	0.0231768		223.6	0.261626	0.257864	0.218679	0.216704	0.163299	0.163821	0.127014	0.124316
			223.8	0.524461	0.522118	0.48849	0.485958	0.418856	0.418565	0.382914	0.383377		223.8	0.0867129	0.0858377	0.0676441	0.0675242	0.0376275	0.0375626	0.0231468	0.0231822		223.8	0.261834	0.257897	0.219039	0.21673	0.163502	0.163835	0.127241	0.124316
			224	0.524943	0.522166	0.489158	0.485995	0.41931	0.418599	0.383301	0.383426		224	0.0868565	0.0858571	0.0681372	0.0675419	0.0379456	0.0375722	0.0231722	0.0231875		224	0.262154	0.25793	0.218838	0.216757	0.163562	0.163849	0.127304	0.124316
			224.2	0.525329	0.522215	0.489633	0.486032	0.419562	0.418632	0.383556	0.383476		224.2	0.086958	0.0858764	0.0680432	0.0675597	0.0381871	0.0375819	0.0231095	0.0231929		224.2	0.261836	0.257963	0.219092	0.216783	0.163786	0.163863	0.127122	0.124317
			224.4	0.525505	0.522263	0.489258	0.486069	0.41953	0.418665	0.383479	0.383525		224.4	0.087027	0.0858957	0.0683637	0.0675774	0.0383007	0.0375915	0.0228373	0.0231983		224.4	0.261687	0.257997	0.219228	0.216809	0.164333	0.163877	0.127109	0.124317
			224.6	0.525446	0.522311	0.489274	0.486105	0.419307	0.418698	0.383132	0.383575		224.6	0.0873564	0.085915	0.0689345	0.0675951	0.039082	0.0376012	0.0227322	0.0232037		224.6	0.261264	0.25803	0.218986	0.216836	0.164141	0.16389	0.127216	0.124317
			224.8	0.525959	0.52236	0.489757	0.486142	0.419501	0.418731	0.383456	0.383624		224.8	0.0877363	0.0859343	0.0694104	0.0676129	0.0395606	0.0376108	0.0223615	0.0232091		224.8	0.260943	0.258063	0.218842	0.216862	0.16441	0.163904	0.127754	0.124317
			225	0.525733	0.522408	0.489595	0.486179	0.419268	0.418764	0.382954	0.383673		225	0.0882443	0.0859536	0.0702812	0.0676306	0.0404674	0.0376204	0.0225933	0.0232145		225	0.261137	0.258096	0.218639	0.216888	0.164248	0.163918	0.127723	0.124318
			225.2	0.525421	0.522456	0.489155	0.486215	0.419286	0.418797	0.383076	0.383722		225.2	0.088526	0.0859729	0.0701767	0.0676483	0.0406519	0.0376301	0.0230014	0.0232199		225.2	0.261089	0.258129	0.21816	0.216915	0.164197	0.163932	0.12785	0.124318
			225.4	0.525709	0.522505	0.488773	0.486252	0.419311	0.418831	0.383104	0.383771		225.4	0.0888073	0.0859922	0.0704728	0.067666	0.0404196	0.0376397	0.0228132	0.0232253		225.4	0.260887	0.258161	0.217913	0.216941	0.16404	0.163946	0.127775	0.124318
			225.6	0.525481	0.522553	0.488531	0.486289	0.419117	0.418864	0.383223	0.38382		225.6	0.0886839	0.0860115	0.0704517	0.0676837	0.0405319	0.0376493	0.0230219	0.0232306		225.6	0.260817	0.258194	0.218317	0.216967	0.16403	0.16396	0.127849	0.124318
			225.8	0.525239	0.522601	0.488456	0.486325	0.418746	0.418897	0.382748	0.383869		225.8	0.0882589	0.0860307	0.0705758	0.0677014	0.0403266	0.037659	0.0230325	0.023236		225.8	0.260731	0.258227	0.218545	0.216993	0.164194	0.163974	0.127644	0.124318
			226	0.525109	0.52265	0.488137	0.486362	0.418177	0.418929	0.382456	0.383918		226	0.0882846	0.08605	0.0704003	0.0677191	0.0401526	0.0376686	0.0229383	0.0232414		226	0.260547	0.25826	0.218361	0.217019	0.164004	0.163987	0.127682	0.124319
			226.2	0.525043	0.522698	0.488277	0.486398	0.417799	0.418962	0.382428	0.383966		226.2	0.0878609	0.0860693	0.0699434	0.0677368	0.0393822	0.0376782	0.0223749	0.0232468		226.2	0.259997	0.258293	0.21871	0.217046	0.164335	0.164001	0.127627	0.124319
			226.4	0.524778	0.522746	0.488288	0.486435	0.417717	0.418995	0.382422	0.384015		226.4	0.0878699	0.0860885	0.069531	0.0677545	0.0390646	0.0376878	0.0220837	0.0232522		226.4	0.259647	0.258326	0.218299	0.217072	0.163907	0.164015	0.126874	0.124319
			226.6	0.524689	0.522794	0.488295	0.486472	0.417382	0.419028	0.382305	0.384063		226.6	0.0875941	0.0861078	0.0694653	0.0677722	0.0388361	0.0376975	0.0218396	0.0232576		226.6	0.259757	0.258359	0.217902	0.217098	0.164054	0.164029	0.126451	0.124319
			226.8	0.525087	0.522842	0.488444	0.486508	0.417985	0.419061	0.382795	0.384111		226.8	0.0878991	0.086127	0.0697642	0.0677898	0.0387899	0.0377071	0.0221594	0.023263		226.8	0.259854	0.258391	0.217912	0.217124	0.163857	0.164042	0.126163	0.12432
			227	0.52522	0.52289	0.48854	0.486545	0.41803	0.419094	0.383164	0.384159		227	0.0880897	0.0861462	0.0695651	0.0678075	0.0384294	0.0377167	0.0221263	0.0232683		227	0.260028	0.258424	0.218499	0.21715	0.163711	0.164056	0.125438	0.12432
			227.2	0.525163	0.522938	0.488771	0.486581	0.418039	0.419127	0.383722	0.384207		227.2	0.0877462	0.0861654	0.0689652	0.0678252	0.0377991	0.0377263	0.0218009	0.0232737		227.2	0.26023	0.258457	0.218507	0.217176	0.163829	0.16407	0.125146	0.12432
			227.4	0.525222	0.522986	0.489387	0.486618	0.41835	0.419159	0.384244	0.384255		227.4	0.087327	0.0861847	0.0687277	0.0678428	0.0372363	0.0377359	0.0215612	0.0232791		227.4	0.260811	0.25849	0.219212	0.217202	0.16436	0.164084	0.125536	0.12432
			227.6	0.526014	0.523034	0.490178	0.486654	0.419234	0.419192	0.385155	0.384303		227.6	0.0868393	0.0862039	0.0684369	0.0678605	0.0367299	0.0377456	0.0213474	0.0232845		227.6	0.26133	0.258522	0.219561	0.217228	0.164288	0.164097	0.12549	0.124321
			227.8	0.526546	0.523082	0.490576	0.486691	0.419832	0.419225	0.385085	0.384351		227.8	0.0866888	0.0862231	0.0680551	0.0678781	0.0367095	0.0377552	0.0215456	0.0232899		227.8	0.261725	0.258555	0.220381	0.217254	0.164063	0.164111	0.125598	0.124321
			228	0.52701	0.52313	0.491126	0.486727	0.420203	0.419257	0.385717	0.384399		228	0.0861902	0.0862423	0.0676916	0.0678958	0.0366999	0.0377648	0.0219904	0.0232953		228	0.261865	0.258588	0.219983	0.21728	0.16361	0.164125	0.125574	0.124321
			228.2	0.527208	0.523178	0.491313	0.486764	0.420207	0.41929	0.38585	0.384446		228.2	0.0857819	0.0862614	0.0669695	0.0679134	0.0363901	0.0377744	0.0219972	0.0233006		228.2	0.261738	0.25862	0.219727	0.217306	0.163613	0.164138	0.126081	0.124321
			228.4	0.527397	0.523226	0.491352	0.4868	0.420424	0.419323	0.386129	0.384494		228.4	0.0856616	0.0862806	0.067373	0.067931	0.0368313	0.037784	0.0216298	0.023306		228.4	0.261569	0.258653	0.21936	0.217332	0.163436	0.164152	0.12611	0.124321
			228.6	0.527616	0.523274	0.491571	0.486837	0.420219	0.419355	0.386038	0.384541		228.6	0.086139	0.0862998	0.0675166	0.0679487	0.0372093	0.0377936	0.0221392	0.0233114		228.6	0.261538	0.258686	0.218814	0.217358	0.162373	0.164165	0.126294	0.124322
			228.8	0.52762	0.523322	0.491584	0.486873	0.420313	0.419388	0.385582	0.384588		228.8	0.0862595	0.086319	0.0673775	0.0679663	0.0373076	0.0378032	0.0219049	0.0233168		228.8	0.26119	0.258718	0.218712	0.217384	0.162029	0.164179	0.126848	0.124322
			229	0.527507	0.52337	0.49135	0.486909	0.420001	0.41942	0.38516	0.384635		229	0.0864136	0.0863381	0.0671606	0.0679839	0.037416	0.0378128	0.0219282	0.0233222		229	0.261739	0.258751	0.21843	0.21741	0.161691	0.164193	0.126852	0.124322
			229.2	0.527597	0.523418	0.4914	0.486946	0.420352	0.419453	0.385394	0.384682		229.2	0.0862789	0.0863573	0.0666137	0.0680015	0.0371572	0.0378224	0.0221456	0.0233275		229.2	0.260921	0.258783	0.217563	0.217436	0.161183	0.164206	0.126751	0.124322
			229.4	0.527382	0.523466	0.491618	0.486982	0.42026	0.419485	0.385007	0.384729		229.4	0.0866136	0.0863764	0.0668005	0.0680192	0.037202	0.037832	0.0223754	0.0233329		229.4	0.260931	0.258816	0.217575	0.217462	0.161149	0.16422	0.126778	0.124323
			229.6	0.526965	0.523514	0.491697	0.487019	0.419985	0.419517	0.385025	0.384776		229.6	0.0868275	0.0863955	0.0669703	0.0680368	0.0372733	0.0378416	0.0228014	0.0233383		229.6	0.260485	0.258848	0.217347	0.217488	0.161194	0.164233	0.127334	0.124323
			229.8	0.526733	0.523561	0.491705	0.487055	0.419805	0.41955	0.384792	0.384823		229.8	0.0872535	0.0864147	0.0674697	0.0680544	0.0374792	0.0378513	0.0230897	0.0233437		229.8	0.260563	0.258881	0.216951	0.217513	0.161299	0.164247	0.127399	0.124323
			230	0.526507	0.523609	0.491267	0.487091	0.419672	0.419582	0.384423	0.38487		230	0.0876433	0.0864338	0.0672342	0.068072	0.037206	0.0378609	0.0231266	0.0233491		230	0.26068	0.258913	0.216534	0.217539	0.161339	0.16426	0.126653	0.124323
			230.2	0.526005	0.523657	0.490964	0.487128	0.419967	0.419615	0.384566	0.384916		230.2	0.087346	0.0864529	0.0673896	0.0680895	0.0373955	0.0378704	0.0232263	0.0233544		230.2	0.260466	0.258945	0.216943	0.217565	0.161945	0.164274	0.126389	0.124323
			230.4	0.525453	0.523704	0.490855	0.487164	0.420218	0.419647	0.384581	0.384963		230.4	0.0875124	0.086472	0.0674964	0.0681071	0.0375397	0.03788	0.0236369	0.0233598		230.4	0.26039	0.258978	0.216796	0.217591	0.162221	0.164287	0.125765	0.124324
			230.6	0.525363	0.523752	0.490961	0.4872	0.420074	0.419679	0.384482	0.385009		230.6	0.0878026	0.0864911	0.068059	0.0681247	0.0376815	0.0378896	0.0238767	0.0233652		230.6	0.260438	0.25901	0.216751	0.217617	0.162616	0.164301	0.125687	0.124324
			230.8	0.525254	0.5238	0.490472	0.487237	0.420433	0.419711	0.384491	0.385056		230.8	0.0881543	0.0865102	0.0683173	0.0681423	0.0379467	0.0378992	0.024218	0.0233706		230.8	0.260284	0.259043	0.216785	0.217642	0.162728	0.164314	0.125583	0.124324
			231	0.525276	0.523847	0.49078	0.487273	0.420068	0.419744	0.384968	0.385102		231	0.088605	0.0865293	0.0684991	0.0681599	0.0383906	0.0379088	0.0246413	0.023376		231	0.260279	0.259075	0.216897	0.217668	0.163275	0.164327	0.125691	0.124324
			231.2	0.525355	0.523895	0.490825	0.487309	0.420457	0.419776	0.385413	0.385148		231.2	0.0884325	0.0865484	0.0684515	0.0681774	0.0385208	0.0379184	0.0245987	0.0233813		231.2	0.260341	0.259107	0.216974	0.217694	0.163887	0.164341	0.126065	0.124324
			231.4	0.525903	0.523943	0.491295	0.487346	0.420899	0.419808	0.38601	0.385194		231.4	0.0882603	0.0865675	0.0690804	0.068195	0.0391923	0.037928	0.0247926	0.0233867		231.4	0.260768	0.259139	0.217684	0.21772	0.164463	0.164354	0.126574	0.124325
			231.6	0.52649	0.52399	0.49175	0.487382	0.421733	0.41984	0.386283	0.38524		231.6	0.0880458	0.0865865	0.0693001	0.0682125	0.0394026	0.0379376	0.0250285	0.0233921		231.6	0.261349	0.259172	0.218339	0.217745	0.164675	0.164368	0.127296	0.124325
			231.8	0.526685	0.524038	0.491815	0.487418	0.422224	0.419872	0.386196	0.385286		231.8	0.0881014	0.0866056	0.0698121	0.0682301	0.0391847	0.0379472	0.0251775	0.0233975		231.8	0.26189	0.259204	0.218432	0.217771	0.165146	0.164381	0.127643	0.124325
			232	0.527182	0.524085	0.491791	0.487454	0.422216	0.419904	0.386534	0.385332		232	0.0877074	0.0866247	0.0699123	0.0682476	0.0389048	0.0379568	0.0250078	0.0234029		232	0.262194	0.259236	0.218523	0.217797	0.165728	0.164394	0.128045	0.124325
			232.2	0.527461	0.524133	0.491508	0.48749	0.422131	0.419936	0.386545	0.385377		232.2	0.0875339	0.0866437	0.0699306	0.0682652	0.0385781	0.0379664	0.0245667	0.0234082		232.2	0.262273	0.259268	0.218231	0.217822	0.165416	0.164408	0.128175	0.124325
			232.4	0.528397	0.52418	0.491587	0.487527	0.422355	0.419968	0.386813	0.385423		232.4	0.0874211	0.0866627	0.0702371	0.0682827	0.0388509	0.0379759	0.0241304	0.0234136		232.4	0.262799	0.2593	0.218907	0.217848	0.165886	0.164421	0.128257	0.124326
			232.6	0.528644	0.524228	0.491106	0.487563	0.421918	0.42	0.386815	0.385468		232.6	0.0872503	0.0866818	0.0703166	0.0683003	0.0387175	0.0379855	0.024006	0.023419		232.6	0.263031	0.259333	0.219218	0.217873	0.165438	0.164434	0.128882	0.124326
			232.8	0.528757	0.524275	0.491065	0.487599	0.422193	0.420032	0.386616	0.385514		232.8	0.0868133	0.0867008	0.0697976	0.0683178	0.0382323	0.0379951	0.0230273	0.0234244		232.8	0.263108	0.259365	0.218915	0.217899	0.165585	0.164447	0.129143	0.124326
			233	0.529027	0.524322	0.491323	0.487635	0.422108	0.420064	0.387069	0.385559		233	0.0866544	0.0867198	0.0695219	0.0683353	0.0378815	0.0380047	0.0225959	0.0234297		233	0.263511	0.259397	0.219095	0.217924	0.165783	0.164461	0.129231	0.124326
			233.2	0.528955	0.52437	0.491324	0.487671	0.422006	0.420096	0.387261	0.385604		233.2	0.0869063	0.0867388	0.0695189	0.0683528	0.0380729	0.0380143	0.0225363	0.0234351		233.2	0.262914	0.259429	0.21829	0.21795	0.16537	0.164474	0.129299	0.124326
			233.4	0.528982	0.524417	0.491382	0.487707	0.42191	0.420128	0.387115	0.385649		233.4	0.0868759	0.0867579	0.0694098	0.0683703	0.0376871	0.0380238	0.0221585	0.0234405		233.4	0.263131	0.259461	0.21833	0.217976	0.165019	0.164487	0.129204	0.124327
			233.6	0.528751	0.524464	0.490721	0.487744	0.42149	0.42016	0.387153	0.385694		233.6	0.0865792	0.0867769	0.0690598	0.0683879	0.03721	0.0380334	0.0217348	0.0234459		233.6	0.262918	0.259493	0.218394	0.218001	0.164894	0.1645	0.128777	0.124327
			233.8	0.528403	0.524512	0.49045	0.48778	0.421456	0.420192	0.386765	0.385739		233.8	0.0862037	0.0867958	0.0690105	0.0684054	0.0369424	0.038043	0.0215111	0.0234512		233.8	0.263028	0.259525	0.218644	0.218026	0.164468	0.164514	0.128065	0.124327
			234	0.528371	0.524559	0.490442	0.487816	0.421174	0.420223	0.386591	0.385784		234	0.0855345	0.0868148	0.0682685	0.0684229	0.0362684	0.0380526	0.0208781	0.0234566		234	0.263061	0.259557	0.218893	0.218052	0.164574	0.164527	0.127686	0.124327
			234.2	0.528135	0.524606	0.49069	0.487852	0.421094	0.420255	0.386769	0.385829		234.2	0.0851384	0.0868338	0.0683973	0.0684404	0.0364386	0.0380621	0.0208456	0.023462		234.2	0.262418	0.259589	0.219249	0.218077	0.164929	0.16454	0.127928	0.124327
			234.4	0.527706	0.524653	0.490731	0.487888	0.42045	0.420287	0.386725	0.385873		234.4	0.0855013	0.0868528	0.0685734	0.0684578	0.0365806	0.0380717	0.0211328	0.0234674		234.4	0.261801	0.259621	0.21923	0.218103	0.164792	0.164553	0.127435	0.124327
			234.6	0.528058	0.524701	0.491232	0.487924	0.420461	0.420319	0.38685	0.385918		234.6	0.086102	0.0868718	0.0687288	0.0684753	0.0370602	0.0380813	0.021661	0.0234727		234.6	0.261338	0.259653	0.218842	0.218128	0.164128	0.164566	0.127416	0.124328
			234.8	0.527556	0.524748	0.490786	0.48796	0.420108	0.42035	0.386714	0.385963		234.8	0.0863979	0.0868907	0.0688118	0.0684928	0.0375366	0.0380908	0.022253	0.0234781		234.8	0.261027	0.259685	0.218511	0.218154	0.164036	0.164579	0.12715	0.124328
			235	0.527941	0.524795	0.491366	0.487996	0.420029	0.420382	0.387281	0.386007		235	0.0870133	0.0869097	0.0689012	0.0685103	0.0378783	0.0381004	0.0228615	0.0234835		235	0.260503	0.259717	0.218215	0.218179	0.164059	0.164593	0.126914	0.124328
			235.2	0.528134	0.524842	0.491879	0.488032	0.420826	0.420414	0.387691	0.386051		235.2	0.0872452	0.0869286	0.0691596	0.0685278	0.0380503	0.03811	0.0225228	0.0234889		235.2	0.260559	0.259748	0.21841	0.218204	0.164548	0.164606	0.126886	0.124328
			235.4	0.528156	0.524889	0.492114	0.488068	0.421182	0.420445	0.387642	0.386095		235.4	0.0875972	0.0869476	0.0698945	0.0685452	0.0385182	0.0381195	0.0227976	0.0234942		235.4	0.260552	0.25978	0.218871	0.21823	0.164894	0.164619	0.126576	0.124328
			235.6	0.527838	0.524936	0.491978	0.488104	0.421432	0.420477	0.387194	0.38614		235.6	0.0881792	0.0869665	0.0701602	0.0685627	0.0381581	0.0381291	0.0233847	0.0234996		235.6	0.260799	0.259812	0.218713	0.218255	0.164829	0.164632	0.12646	0.124329
			235.8	0.528091	0.524983	0.491406	0.48814	0.421044	0.420508	0.387001	0.386184		235.8	0.0883467	0.0869854	0.0703522	0.0685801	0.0378968	0.0381386	0.0235545	0.023505		235.8	0.261084	0.259844	0.218601	0.21828	0.165135	0.164645	0.126416	0.124329
			236	0.528345	0.52503	0.491406	0.488176	0.42117	0.42054	0.387174	0.386228		236	0.0886658	0.0870043	0.0701815	0.0685976	0.038063	0.0381482	0.0239948	0.0235104		236	0.260977	0.259876	0.218441	0.218306	0.164674	0.164658	0.126279	0.124329
			236.2	0.528403	0.525077	0.491244	0.488212	0.421095	0.420572	0.387183	0.386272		236.2	0.0886603	0.0870232	0.0695865	0.068615	0.0376483	0.0381578	0.0238457	0.0235157		236.2	0.260719	0.259907	0.218025	0.218331	0.16409	0.164671	0.125962	0.124329
			236.4	0.528326	0.525124	0.491397	0.488248	0.421153	0.420603	0.387174	0.386315		236.4	0.0888682	0.0870422	0.0696427	0.0686325	0.0377593	0.0381673	0.0237008	0.0235211		236.4	0.260759	0.259939	0.218495	0.218356	0.164496	0.164684	0.125773	0.124329
			236.6	0.527782	0.525171	0.490635	0.488284	0.420758	0.420634	0.386881	0.386359		236.6	0.0885215	0.0870611	0.0693098	0.0686499	0.0374597	0.0381769	0.0233976	0.0235265		236.6	0.260651	0.259971	0.218268	0.218381	0.164074	0.164697	0.125909	0.124329
			236.8	0.528153	0.525218	0.490796	0.48832	0.420631	0.420666	0.386673	0.386403		236.8	0.0891344	0.0870799	0.0695356	0.0686674	0.0376482	0.0381864	0.0235334	0.0235318		236.8	0.260737	0.260002	0.217774	0.218406	0.163742	0.16471	0.12528	0.12433
			237	0.528342	0.525265	0.490632	0.488356	0.420736	0.420697	0.386756	0.386446		237	0.0891487	0.0870988	0.0694128	0.0686848	0.0379	0.038196	0.0235521	0.0235372		237	0.260674	0.260034	0.218201	0.218432	0.163837	0.164723	0.125088	0.12433
			237.2	0.528067	0.525312	0.490464	0.488392	0.420152	0.420729	0.386427	0.38649		237.2	0.0895063	0.0871177	0.0695678	0.0687022	0.0378465	0.0382055	0.0238099	0.0235426		237.2	0.260309	0.260066	0.217692	0.218457	0.162877	0.164736	0.124568	0.12433
			237.4	0.527995	0.525359	0.490097	0.488428	0.420112	0.42076	0.38585	0.386533		237.4	0.0887953	0.0871366	0.0693832	0.0687196	0.0374377	0.0382151	0.0235151	0.023548		237.4	0.260516	0.260097	0.217864	0.218482	0.162439	0.164749	0.12405	0.12433
			237.6	0.527339	0.525406	0.489481	0.488463	0.419395	0.420791	0.384894	0.386576		237.6	0.0886191	0.0871555	0.0694803	0.068737	0.0374857	0.0382246	0.0236	0.0235533		237.6	0.260595	0.260129	0.218654	0.218507	0.162574	0.164762	0.123707	0.12433
			237.8	0.527421	0.525453	0.489644	0.488499	0.419447	0.420823	0.384865	0.386619		237.8	0.0886231	0.0871743	0.0698667	0.0687545	0.0377768	0.0382342	0.024423	0.0235587		237.8	0.260255	0.26016	0.218821	0.218532	0.162144	0.164775	0.123699	0.12433
			238	0.527557	0.525499	0.489739	0.488535	0.419672	0.420854	0.384882	0.386663		238	0.0887077	0.0871932	0.0697649	0.0687719	0.0380161	0.0382437	0.0245259	0.0235641		238	0.259991	0.260192	0.218652	0.218557	0.162248	0.164788	0.124032	0.124331
			238.2	0.527929	0.525546	0.489549	0.488571	0.419985	0.420885	0.384831	0.386706		238.2	0.088494	0.087212	0.0698921	0.0687893	0.0384124	0.0382533	0.0245046	0.0235694		238.2	0.259662	0.260224	0.218863	0.218582	0.162154	0.1648	0.124126	0.124331
			238.4	0.528275	0.525593	0.48978	0.488607	0.420172	0.420917	0.385127	0.386749		238.4	0.0883361	0.0872309	0.0697759	0.0688067	0.0382958	0.0382628	0.0247297	0.0235748		238.4	0.259694	0.260255	0.219337	0.218608	0.162721	0.164813	0.124398	0.124331
			238.6	0.528488	0.52564	0.489786	0.488643	0.420525	0.420948	0.384719	0.386791		238.6	0.0883193	0.0872497	0.0695392	0.0688241	0.0383089	0.0382723	0.0247741	0.0235802		238.6	0.259949	0.260286	0.219396	0.218633	0.163007	0.164826	0.125048	0.124331
			238.8	0.528354	0.525686	0.489467	0.488678	0.420132	0.420979	0.384685	0.386834		238.8	0.0881713	0.0872685	0.0697948	0.0688414	0.0386751	0.0382819	0.0247352	0.0235855		238.8	0.25985	0.260318	0.21889	0.218658	0.163464	0.164839	0.124856	0.124331
			239	0.528792	0.525733	0.489751	0.488714	0.420827	0.42101	0.385153	0.386877		239	0.0883782	0.0872873	0.0701377	0.0688588	0.0389431	0.0382914	0.0247157	0.0235909		239	0.259483	0.260349	0.218644	0.218683	0.163683	0.164852	0.124863	0.124331
			239.2	0.52908	0.52578	0.489947	0.48875	0.421339	0.421041	0.385533	0.38692		239.2	0.0887795	0.0873061	0.0707225	0.0688762	0.0392294	0.038301	0.0248151	0.0235963		239.2	0.259736	0.260381	0.218908	0.218708	0.164342	0.164865	0.125398	0.124331
			239.4	0.528467	0.525826	0.489546	0.488786	0.4212	0.421072	0.385078	0.386962		239.4	0.0886445	0.087325	0.0707017	0.0688936	0.0389026	0.0383105	0.0248122	0.0236016		239.4	0.259983	0.260412	0.21897	0.218733	0.164908	0.164877	0.125378	0.124332
			239.6	0.528154	0.525873	0.489216	0.488822	0.420605	0.421104	0.384848	0.387004		239.6	0.0890858	0.0873438	0.0708737	0.0689109	0.0389432	0.03832	0.0252097	0.023607		239.6	0.260238	0.260444	0.219074	0.218758	0.165076	0.16489	0.12579	0.124332
			239.8	0.528118	0.52592	0.489345	0.488857	0.420566	0.421135	0.385229	0.387047		239.8	0.0886742	0.0873625	0.0708978	0.0689283	0.0389569	0.0383296	0.0246194	0.0236124		239.8	0.260342	0.260475	0.218518	0.218783	0.165084	0.164903	0.126231	0.124332
			240	0.527556	0.525966	0.489513	0.488893	0.421075	0.421166	0.385515	0.387089		240	0.0887602	0.0873813	0.0706828	0.0689457	0.0392525	0.0383391	0.0245998	0.0236177		240	0.260224	0.260506	0.218088	0.218807	0.165128	0.164916	0.12651	0.124332
			240.2	0.527557	0.526013	0.489311	0.488929	0.421011	0.421197	0.385767	0.387131		240.2	0.0885636	0.0874001	0.0707009	0.068963	0.0388726	0.0383486	0.0241225	0.0236231		240.2	0.260157	0.260538	0.218091	0.218832	0.165226	0.164929	0.12624	0.124332
			240.4	0.527406	0.526059	0.489488	0.488964	0.42068	0.421228	0.385979	0.387173		240.4	0.0884521	0.0874189	0.0708933	0.0689804	0.0387865	0.0383581	0.0235857	0.0236285		240.4	0.260358	0.260569	0.218504	0.218857	0.16567	0.164941	0.126474	0.124332
			240.6	0.527549	0.526106	0.489419	0.489	0.420369	0.421259	0.38604	0.387216		240.6	0.0882955	0.0874377	0.0707681	0.0689977	0.0388343	0.0383677	0.0233188	0.0236338		240.6	0.260747	0.2606	0.218462	0.218882	0.165777	0.164954	0.126519	0.124333
			240.8	0.528284	0.526152	0.49015	0.489036	0.42082	0.42129	0.386446	0.387257		240.8	0.0885105	0.0874564	0.0711762	0.0690151	0.0388673	0.0383772	0.0234544	0.0236392		240.8	0.260652	0.260631	0.218854	0.218907	0.165656	0.164967	0.126335	0.124333
			241	0.528253	0.526199	0.4901	0.489071	0.420965	0.421321	0.386169	0.387299		241	0.0881586	0.0874752	0.0712652	0.0690324	0.0387606	0.0383867	0.0230882	0.0236446		241	0.2605	0.260663	0.218879	0.218932	0.165807	0.164979	0.126965	0.124333
			241.2	0.52807	0.526245	0.490116	0.489107	0.420608	0.421352	0.386163	0.387341		241.2	0.0882887	0.0874939	0.0713543	0.0690497	0.0385931	0.0383962	0.0228924	0.0236499		241.2	0.260515	0.260694	0.218423	0.218957	0.165387	0.164992	0.126485	0.124333
			241.4	0.527881	0.526292	0.489989	0.489143	0.42076	0.421382	0.386161	0.387383		241.4	0.0880568	0.0875127	0.0708963	0.0690671	0.0386917	0.0384058	0.0224873	0.0236553		241.4	0.261018	0.260725	0.218801	0.218981	0.165523	0.165005	0.126907	0.124333
			241.6	0.52781	0.526338	0.489834	0.489178	0.420691	0.421413	0.386365	0.387425		241.6	0.0884395	0.0875314	0.0709759	0.0690844	0.0389387	0.0384153	0.023115	0.0236607		241.6	0.260977	0.260756	0.218655	0.219006	0.165473	0.165017	0.126899	0.124333
			241.8	0.527981	0.526384	0.489859	0.489214	0.420835	0.421444	0.386935	0.387466		241.8	0.0890095	0.0875501	0.0708396	0.0691017	0.0388343	0.0384248	0.0230783	0.023666		241.8	0.260907	0.260787	0.218119	0.219031	0.165055	0.16503	0.127208	0.124333
			242	0.52829	0.526431	0.489589	0.48925	0.421043	0.421475	0.38676	0.387508		242	0.0892495	0.0875688	0.0705042	0.069119	0.038912	0.0384343	0.022954	0.0236714		242	0.26105	0.260818	0.218052	0.219056	0.164797	0.165043	0.127505	0.124334
			242.2	0.528661	0.526477	0.489552	0.489285	0.421097	0.421506	0.386871	0.387549		242.2	0.0889968	0.0875876	0.0701851	0.0691363	0.0390554	0.0384438	0.0225958	0.0236768		242.2	0.261555	0.260849	0.218379	0.21908	0.164816	0.165055	0.127854	0.124334
			242.4	0.528579	0.526523	0.489508	0.489321	0.420998	0.421537	0.387103	0.38759		242.4	0.0889851	0.0876063	0.0697594	0.0691536	0.0389858	0.0384533	0.0230282	0.0236821		242.4	0.262139	0.260881	0.218729	0.219105	0.165875	0.165068	0.128151	0.124334
			242.6	0.528361	0.526569	0.488883	0.489356	0.420841	0.421567	0.386564	0.387632		242.6	0.0892685	0.087625	0.0692001	0.0691709	0.0389606	0.0384629	0.0229139	0.0236875		242.6	0.262679	0.260912	0.218853	0.21913	0.165905	0.16508	0.128167	0.124334
			242.8	0.528524	0.526616	0.489357	0.489392	0.420745	0.421598	0.386942	0.387673		242.8	0.0891072	0.0876437	0.0688894	0.0691882	0.0389329	0.0384724	0.022729	0.0236929		242.8	0.262918	0.260943	0.218412	0.219155	0.165592	0.165093	0.127984	0.124334
			243	0.528735	0.526662	0.489804	0.489427	0.421729	0.421629	0.387272	0.387714		243	0.0889415	0.0876623	0.0684339	0.0692055	0.0384124	0.0384819	0.0224499	0.0236982		243	0.263363	0.260974	0.219145	0.219179	0.165646	0.165105	0.128229	0.124334
			243.2	0.52928	0.526708	0.490193	0.489463	0.422012	0.42166	0.387196	0.387755		243.2	0.0891206	0.087681	0.0682231	0.0692228	0.0382078	0.0384914	0.0227053	0.0237036		243.2	0.263918	0.261005	0.219176	0.219204	0.165652	0.165118	0.12818	0.124334
			243.4	0.528907	0.526754	0.490497	0.489498	0.422068	0.42169	0.386782	0.387796		243.4	0.0888382	0.0876997	0.0681939	0.0692401	0.0376649	0.0385009	0.0221864	0.0237089		243.4	0.264373	0.261036	0.219321	0.219229	0.165404	0.16513	0.128027	0.124334
			243.6	0.529227	0.5268	0.490736	0.489534	0.422196	0.421721	0.386954	0.387837		243.6	0.0890264	0.0877184	0.0683205	0.0692573	0.0381037	0.0385104	0.0226019	0.0237143		243.6	0.264649	0.261067	0.219764	0.219253	0.165384	0.165143	0.128289	0.124335
			243.8	0.529258	0.526847	0.491177	0.489569	0.422605	0.421751	0.387186	0.387877		243.8	0.0887284	0.087737	0.0681388	0.0692746	0.0381244	0.0385199	0.022178	0.0237197		243.8	0.26488	0.261097	0.21953	0.219278	0.165337	0.165155	0.128102	0.124335
			244	0.529442	0.526893	0.491231	0.489605	0.42283	0.421782	0.387293	0.387918		244	0.0887807	0.0877557	0.0683343	0.0692919	0.0383366	0.0385294	0.0227986	0.023725		244	0.264938	0.261128	0.219591	0.219302	0.165813	0.165168	0.127666	0.124335
			244.2	0.530151	0.526939	0.491999	0.48964	0.423252	0.421813	0.38796	0.387959		244.2	0.088709	0.0877743	0.0686506	0.0693091	0.0379914	0.0385389	0.0223873	0.0237304		244.2	0.265	0.261159	0.21934	0.219327	0.16502	0.16518	0.126983	0.124335
			244.4	0.53028	0.526985	0.492682	0.489676	0.42336	0.421843	0.387963	0.387999		244.4	0.0884714	0.087793	0.0691693	0.0693264	0.0381329	0.0385484	0.0220888	0.0237358		244.4	0.264437	0.26119	0.219563	0.219351	0.164922	0.165193	0.126858	0.124335
			244.6	0.530416	0.527031	0.492912	0.489711	0.423417	0.421874	0.388341	0.38804		244.6	0.0881122	0.0878116	0.0694335	0.0693437	0.0379106	0.0385579	0.0220221	0.0237411		244.6	0.264411	0.261221	0.219652	0.219376	0.165034	0.165205	0.126719	0.124335
			244.8	0.530592	0.527077	0.493427	0.489747	0.424184	0.421904	0.388524	0.38808		244.8	0.0882335	0.0878302	0.0698647	0.0693609	0.0380665	0.0385674	0.0224055	0.0237465		244.8	0.264157	0.261252	0.220007	0.2194	0.164844	0.165218	0.127213	0.124335
			245	0.530133	0.527123	0.493032	0.489782	0.423744	0.421935	0.38794	0.388121		245	0.0886426	0.0878489	0.0706733	0.0693782	0.0385557	0.0385769	0.0227989	0.0237518		245	0.264039	0.261283	0.219529	0.219425	0.164664	0.16523	0.127146	0.124335
			245.2	0.530011	0.527169	0.493059	0.489817	0.423678	0.421965	0.388006	0.388161		245.2	0.088551	0.0878675	0.0708003	0.0693954	0.0386655	0.0385864	0.0227583	0.0237572		245.2	0.264018	0.261313	0.219632	0.219449	0.164341	0.165242	0.126671	0.124336
			245.4	0.529836	0.527215	0.492903	0.489853	0.423625	0.421996	0.388133	0.388201		245.4	0.0885091	0.0878861	0.0710442	0.0694126	0.038833	0.0385959	0.0229637	0.0237626		245.4	0.263831	0.261344	0.220078	0.219474	0.164163	0.165255	0.127495	0.124336
			245.6	0.529908	0.527261	0.49288	0.489888	0.423514	0.422026	0.388161	0.388241		245.6	0.0881953	0.0879047	0.0709054	0.0694299	0.0384803	0.0386054	0.0232775	0.0237679		245.6	0.26307	0.261375	0.219831	0.219498	0.163882	0.165267	0.127199	0.124336
			245.8	0.529607	0.527307	0.492657	0.489924	0.4233	0.422057	0.387838	0.388281		245.8	0.0886352	0.0879233	0.0710833	0.0694471	0.0383278	0.0386149	0.0232946	0.0237733		245.8	0.263193	0.261405	0.219967	0.219523	0.163445	0.165279	0.127589	0.124336
			246	0.529523	0.527352	0.49186	0.489959	0.422908	0.422087	0.38744	0.388321		246	0.0883549	0.0879419	0.0708641	0.0694643	0.0387606	0.0386244	0.023572	0.0237786		246	0.263108	0.261436	0.220168	0.219547	0.16358	0.165292	0.127797	0.124336
			246.2	0.529347	0.527398	0.491486	0.489994	0.422796	0.422117	0.387849	0.388361		246.2	0.0880073	0.0879605	0.0702256	0.0694815	0.0390798	0.0386339	0.0236187	0.023784		246.2	0.263426	0.261467	0.220172	0.219572	0.16381	0.165304	0.128333	0.124336
			246.4	0.529483	0.527444	0.49126	0.49003	0.422624	0.422148	0.3879	0.388401		246.4	0.0879857	0.087979	0.0698243	0.0694987	0.0388501	0.0386433	0.0238379	0.0237894		246.4	0.26327	0.261497	0.220458	0.219596	0.164088	0.165316	0.128207	0.124336
			246.6	0.529941	0.52749	0.49126	0.490065	0.422574	0.422178	0.387458	0.38844		246.6	0.0880545	0.0879976	0.0690923	0.069516	0.0386511	0.0386528	0.0236502	0.0237947		246.6	0.263268	0.261528	0.220813	0.21962	0.163994	0.165329	0.128109	0.124336
			246.8	0.529991	0.527536	0.491601	0.4901	0.422417	0.422208	0.387063	0.38848		246.8	0.0874699	0.0880162	0.0685778	0.0695332	0.0383484	0.0386623	0.023159	0.0238001		246.8	0.263153	0.261559	0.220431	0.219645	0.163954	0.165341	0.128185	0.124337
			247	0.530409	0.527581	0.491647	0.490135	0.423085	0.422239	0.387057	0.38852		247	0.0879562	0.0880347	0.0687789	0.0695504	0.0385122	0.0386718	0.0238188	0.0238054		247	0.262976	0.261589	0.221075	0.219669	0.164251	0.165353	0.128104	0.124337
			247.2	0.530926	0.527627	0.491843	0.490171	0.422653	0.422269	0.386738	0.388559		247.2	0.088404	0.0880533	0.0689885	0.0695676	0.0387025	0.0386813	0.0245047	0.0238108		247.2	0.262635	0.26162	0.220833	0.219693	0.164461	0.165366	0.12823	0.124337
			247.4	0.530632	0.527673	0.491981	0.490206	0.421794	0.422299	0.386437	0.388599		247.4	0.0885332	0.0880718	0.0690897	0.0695847	0.0388103	0.0386908	0.0245463	0.0238161		247.4	0.262859	0.26165	0.221343	0.219717	0.164704	0.165378	0.128886	0.124337
			247.6	0.530908	0.527719	0.491878	0.490241	0.421816	0.422329	0.386795	0.388638		247.6	0.0887021	0.0880904	0.0691978	0.0696019	0.0396185	0.0387002	0.025347	0.0238215		247.6	0.262937	0.261681	0.221715	0.219742	0.165292	0.16539	0.128784	0.124337
			247.8	0.530473	0.527764	0.491509	0.490277	0.421169	0.42236	0.386654	0.388677		247.8	0.0890107	0.0881089	0.0692022	0.0696191	0.0400161	0.0387097	0.0253544	0.0238269		247.8	0.262643	0.261711	0.221596	0.219766	0.165589	0.165402	0.128329	0.124337
			248	0.530786	0.52781	0.491909	0.490312	0.421444	0.42239	0.38716	0.388717		248	0.0891022	0.0881274	0.069221	0.0696363	0.0395246	0.0387192	0.0254862	0.0238322		248	0.262284	0.261742	0.221013	0.21979	0.165327	0.165414	0.127896	0.124337
			248.2	0.530923	0.527855	0.492522	0.490347	0.421743	0.42242	0.387778	0.388756		248.2	0.0891009	0.0881459	0.0696912	0.0696535	0.0393989	0.0387287	0.0249475	0.0238376		248.2	0.262298	0.261772	0.221117	0.219814	0.165374	0.165427	0.127492	0.124337
			248.4	0.530802	0.527901	0.492346	0.490382	0.421783	0.42245	0.387956	0.388795		248.4	0.0893527	0.0881645	0.0699923	0.0696706	0.0396908	0.0387381	0.0250648	0.0238429		248.4	0.262466	0.261803	0.221419	0.219839	0.165615	0.165439	0.127462	0.124337
			248.6	0.530452	0.527947	0.492307	0.490417	0.421769	0.42248	0.388345	0.388834		248.6	0.0899745	0.088183	0.0703394	0.0696878	0.0396544	0.0387476	0.0251879	0.0238483		248.6	0.262217	0.261833	0.221188	0.219863	0.165867	0.165451	0.127161	0.124338
			248.8	0.530252	0.527992	0.492356	0.490453	0.422107	0.42251	0.388307	0.388873		248.8	0.0903967	0.0882015	0.0708475	0.069705	0.039966	0.0387571	0.0254189	0.0238536		248.8	0.262421	0.261864	0.221556	0.219887	0.165871	0.165463	0.127341	0.124338
			249	0.529864	0.528038	0.492173	0.490488	0.422095	0.42254	0.387984	0.388912		249	0.0901952	0.08822	0.0712458	0.0697221	0.0396369	0.0387666	0.025486	0.023859		249	0.262208	0.261894	0.221965	0.219911	0.165657	0.165475	0.126781	0.124338
			249.2	0.529543	0.528083	0.492163	0.490523	0.421735	0.422571	0.388047	0.38895		249.2	0.0895884	0.0882384	0.0714766	0.0697393	0.0392832	0.038776	0.0248475	0.0238643		249.2	0.262221	0.261924	0.222559	0.219935	0.16559	0.165487	0.126943	0.124338
			249.4	0.529645	0.528129	0.492491	0.490558	0.422165	0.422601	0.388452	0.388989		249.4	0.0890398	0.0882569	0.0713327	0.0697564	0.0388646	0.0387855	0.0243439	0.0238697		249.4	0.262014	0.261955	0.222857	0.219959	0.165178	0.165499	0.127285	0.124338
			249.6	0.529844	0.528174	0.492966	0.490593	0.422596	0.422631	0.388607	0.389028		249.6	0.0889497	0.0882754	0.0706236	0.0697735	0.0384882	0.038795	0.024148	0.0238751		249.6	0.262021	0.261985	0.222426	0.219983	0.165173	0.165511	0.126864	0.124338
			249.8	0.529732	0.52822	0.49273	0.490628	0.423014	0.422661	0.388506	0.389066		249.8	0.0895088	0.0882939	0.0711485	0.0697907	0.0386875	0.0388044	0.0246033	0.0238804		249.8	0.262761	0.262015	0.222116	0.220008	0.164831	0.165524	0.127252	0.124338
			250	0.529785	0.528265	0.492598	0.490663	0.423015	0.422691	0.388347	0.389105		250	0.0894522	0.0883123	0.0707996	0.0698078	0.0388898	0.0388139	0.0241691	0.0238858		250	0.26296	0.262046	0.221693	0.220032	0.164658	0.165536	0.127355	0.124338
			250.2	0.53004	0.52831	0.492931	0.490698	0.423103	0.422721	0.388509	0.389143		250.2	0.089632	0.0883308	0.0708568	0.0698249	0.0388085	0.0388233	0.0245525	0.0238911		250.2	0.263281	0.262076	0.221033	0.220056	0.164447	0.165548	0.127164	0.124338
			250.4	0.53022	0.528356	0.493087	0.490734	0.423049	0.422751	0.388458	0.389182		250.4	0.0900733	0.0883492	0.0711103	0.0698421	0.0390716	0.0388328	0.0240141	0.0238965		250.4	0.263217	0.262106	0.220905	0.22008	0.164675	0.16556	0.12673	0.124339
			250.6	0.53008	0.528401	0.492888	0.490769	0.423099	0.42278	0.388249	0.38922		250.6	0.090273	0.0883677	0.0710793	0.0698592	0.0392355	0.0388423	0.0237331	0.0239018		250.6	0.263691	0.262136	0.220895	0.220104	0.165238	0.165572	0.126932	0.124339
			250.8	0.530019	0.528446	0.492984	0.490804	0.422868	0.42281	0.388091	0.389258		250.8	0.090266	0.0883861	0.0712981	0.0698763	0.0397309	0.0388517	0.0237006	0.0239072		250.8	0.26367	0.262166	0.220289	0.220128	0.165062	0.165584	0.126752	0.124339
			251	0.530452	0.528492	0.493477	0.490839	0.422898	0.42284	0.38851	0.389296		251	0.0902339	0.0884045	0.071129	0.0698934	0.0398992	0.0388612	0.0241621	0.0239125		251	0.263837	0.262197	0.220476	0.220152	0.165125	0.165596	0.126818	0.124339
			251.2	0.530312	0.528537	0.493488	0.490874	0.422151	0.42287	0.388149	0.389335		251.2	0.0901359	0.088423	0.0709924	0.0699105	0.0402076	0.0388706	0.0244125	0.0239179		251.2	0.263813	0.262227	0.219898	0.220176	0.165053	0.165608	0.126816	0.124339
			251.4	0.529785	0.528582	0.493377	0.490909	0.421794	0.4229	0.387976	0.389373		251.4	0.0900411	0.0884414	0.0709579	0.0699276	0.0405511	0.0388801	0.0246582	0.0239232		251.4	0.264782	0.262257	0.220118	0.2202	0.165224	0.16562	0.127302	0.124339
			251.6	0.529923	0.528627	0.493166	0.490944	0.42204	0.42293	0.388081	0.389411		251.6	0.0900054	0.0884598	0.0707835	0.0699447	0.0409144	0.0388895	0.0245748	0.0239286		251.6	0.264597	0.262287	0.22058	0.220224	0.165242	0.165632	0.127358	0.124339
			251.8	0.529808	0.528673	0.493223	0.490979	0.421993	0.42296	0.38808	0.389448		251.8	0.0897312	0.0884782	0.0706315	0.0699618	0.0407311	0.038899	0.0245284	0.0239339		251.8	0.264247	0.262317	0.220322	0.220247	0.165361	0.165643	0.127294	0.124339
			252	0.530318	0.528718	0.493744	0.491014	0.422648	0.422989	0.388172	0.389486		252	0.0895736	0.0884966	0.0705496	0.0699789	0.0402726	0.0389084	0.0241176	0.0239393		252	0.264345	0.262347	0.220501	0.220271	0.165014	0.165655	0.126986	0.124339
			252.2	0.530161	0.528763	0.493877	0.491049	0.423064	0.423019	0.388102	0.389524		252.2	0.089615	0.088515	0.0709863	0.069996	0.0406255	0.0389179	0.0237277	0.0239446		252.2	0.264493	0.262377	0.220578	0.220295	0.165406	0.165667	0.12694	0.124339
			252.4	0.530112	0.528808	0.493646	0.491084	0.423292	0.423049	0.388119	0.389562		252.4	0.089385	0.0885334	0.0706462	0.0700131	0.0401159	0.0389273	0.0234644	0.02395		252.4	0.264433	0.262407	0.220678	0.220319	0.165381	0.165679	0.126844	0.12434
			252.6	0.530359	0.528853	0.49366	0.491119	0.42376	0.423079	0.388169	0.389599		252.6	0.0893894	0.0885517	0.0708843	0.0700301	0.0395791	0.0389368	0.023523	0.0239553		252.6	0.263409	0.262437	0.220387	0.220343	0.165034	0.165691	0.126659	0.12434
			252.8	0.530874	0.528898	0.493908	0.491153	0.424075	0.423109	0.388159	0.389637		252.8	0.0887945	0.0885701	0.0705489	0.0700472	0.0391896	0.0389462	0.0229763	0.0239607		252.8	0.263604	0.262467	0.221036	0.220367	0.164897	0.165703	0.126904	0.12434
			253	0.530896	0.528943	0.494032	0.491188	0.424382	0.423138	0.388257	0.389674		253	0.0885091	0.0885885	0.0705907	0.0700643	0.0387629	0.0389557	0.0230305	0.023966		253	0.262825	0.262497	0.221212	0.220391	0.164598	0.165715	0.126849	0.12434
			253.2	0.531128	0.528989	0.493865	0.491223	0.424308	0.423168	0.388256	0.389712		253.2	0.0880741	0.0886068	0.0709517	0.0700813	0.0391397	0.0389651	0.0226129	0.0239714		253.2	0.263209	0.262527	0.221715	0.220414	0.16478	0.165727	0.12778	0.12434
			253.4	0.531599	0.529034	0.494226	0.491258	0.424991	0.423198	0.388566	0.389749		253.4	0.0880724	0.0886252	0.0709371	0.0700984	0.0390531	0.0389745	0.0224359	0.0239767		253.4	0.263081	0.262557	0.221434	0.220438	0.164326	0.165738	0.127845	0.12434
			253.6	0.531819	0.529079	0.494492	0.491293	0.425668	0.423227	0.388826	0.389786		253.6	0.0883829	0.0886435	0.0712389	0.0701155	0.0390546	0.038984	0.0225638	0.0239821		253.6	0.263027	0.262587	0.22062	0.220462	0.164325	0.16575	0.127627	0.12434
			253.8	0.531476	0.529124	0.494375	0.491328	0.425957	0.423257	0.388886	0.389824		253.8	0.0883939	0.0886619	0.0718139	0.0701325	0.0386854	0.0389934	0.022653	0.0239874		253.8	0.263106	0.262617	0.221127	0.220486	0.164006	0.165762	0.127614	0.12434
			254	0.531952	0.529168	0.494678	0.491363	0.425982	0.423287	0.389625	0.389861		254	0.0883355	0.0886802	0.0718199	0.0701495	0.0384413	0.0390028	0.0224371	0.0239928		254	0.263085	0.262647	0.220692	0.220509	0.164092	0.165774	0.127146	0.12434
			254.2	0.53203	0.529213	0.49433	0.491398	0.425971	0.423316	0.390221	0.389898		254.2	0.0887889	0.0886985	0.0724933	0.0701666	0.038813	0.0390123	0.0230592	0.0239981		254.2	0.263097	0.262676	0.220844	0.220533	0.164619	0.165786	0.127053	0.12434
			254.4	0.531872	0.529258	0.494083	0.491432	0.426271	0.423346	0.390638	0.389935		254.4	0.0889036	0.0887169	0.0723438	0.0701836	0.0392308	0.0390217	0.0225775	0.0240035		254.4	0.262983	0.262706	0.221651	0.220557	0.165516	0.165797	0.127223	0.12434
			254.6	0.531948	0.529303	0.493998	0.491467	0.426037	0.423375	0.391081	0.389972		254.6	0.0892649	0.0887352	0.0722879	0.0702007	0.0392256	0.0390311	0.0227361	0.0240088		254.6	0.263321	0.262736	0.222256	0.22058	0.166017	0.165809	0.127589	0.124341
			254.8	0.531906	0.529348	0.493299	0.491502	0.425431	0.423405	0.39079	0.390009		254.8	0.0889179	0.0887535	0.0724741	0.0702177	0.0394717	0.0390406	0.0231618	0.0240142		254.8	0.263255	0.262766	0.222104	0.220604	0.166152	0.165821	0.127347	0.124341
			255	0.531325	0.529393	0.49262	0.491537	0.424454	0.423434	0.390467	0.390046		255	0.0888078	0.0887718	0.0718793	0.0702347	0.0397209	0.03905	0.023405	0.0240195		255	0.263226	0.262796	0.222079	0.220628	0.166121	0.165833	0.127175	0.124341
			255.2	0.530558	0.529438	0.491807	0.491572	0.423724	0.423464	0.390055	0.390083		255.2	0.0891981	0.0887901	0.0722297	0.0702517	0.0401701	0.0390594	0.0235434	0.0240249		255.2	0.263353	0.262825	0.222543	0.220651	0.166419	0.165844	0.127336	0.124341
			255.4	0.52989	0.529483	0.491507	0.491606	0.42334	0.423493	0.389741	0.390119		255.4	0.0895624	0.0888084	0.0722381	0.0702687	0.0406791	0.0390689	0.0237445	0.0240302		255.4	0.264125	0.262855	0.223986	0.220675	0.167339	0.165856	0.128377	0.124341
			255.6	0.529826	0.529527	0.491496	0.491641	0.422876	0.423523	0.389665	0.390156		255.6	0.0895731	0.0888267	0.0723496	0.0702858	0.0408508	0.0390783	0.0236634	0.0240356		255.6	0.263912	0.262885	0.224225	0.220699	0.16763	0.165868	0.128443	0.124341
			255.8	0.529657	0.529572	0.491594	0.491676	0.422641	0.423552	0.389384	0.390192		255.8	0.0894462	0.0888449	0.0726898	0.0703028	0.0409061	0.0390877	0.0238318	0.0240409		255.8	0.263761	0.262914	0.223582	0.220722	0.168026	0.165879	0.128294	0.124341
			256	0.529796	0.529617	0.491728	0.491711	0.422551	0.423582	0.388947	0.390229		256	0.0894909	0.0888632	0.0723999	0.0703198	0.0408486	0.0390971	0.0233287	0.0240463		256	0.264727	0.262944	0.224287	0.220746	0.168442	0.165891	0.128388	0.124341
			256.2	0.529882	0.529662	0.492136	0.491745	0.422615	0.423611	0.389159	0.390265		256.2	0.0895018	0.0888815	0.0724338	0.0703368	0.040481	0.0391065	0.0229713	0.0240516		256.2	0.264928	0.262974	0.224068	0.220769	0.16873	0.165903	0.128492	0.124341
			256.4	0.530452	0.529706	0.492067	0.49178	0.422544	0.423641	0.389272	0.390302		256.4	0.0892826	0.0888997	0.0721409	0.0703537	0.0398153	0.039116	0.0226829	0.024057		256.4	0.26497	0.263003	0.223532	0.220793	0.168413	0.165914	0.128091	0.124341
			256.6	0.531101	0.529751	0.492458	0.491815	0.422957	0.42367	0.389615	0.390338		256.6	0.0896501	0.088918	0.0723791	0.0703707	0.0398223	0.0391254	0.0228715	0.0240623		256.6	0.264655	0.263033	0.22295	0.220816	0.167457	0.165926	0.127659	0.124341
			256.8	0.531129	0.529796	0.492732	0.49185	0.423	0.423699	0.389497	0.390374		256.8	0.0897297	0.0889362	0.0726098	0.0703877	0.0402744	0.0391348	0.0226053	0.0240676		256.8	0.264658	0.263062	0.222659	0.22084	0.167048	0.165938	0.127588	0.124342
			257	0.531012	0.52984	0.492543	0.491884	0.423156	0.423729	0.389768	0.390411		257	0.0902737	0.0889545	0.0734633	0.0704047	0.040562	0.0391442	0.0233326	0.024073		257	0.264947	0.263092	0.222671	0.220863	0.166864	0.165949	0.127907	0.124342
			257.2	0.531098	0.529885	0.492572	0.491919	0.423249	0.423758	0.389907	0.390447		257.2	0.0898936	0.0889727	0.0733426	0.0704217	0.0403741	0.0391536	0.022788	0.0240783		257.2	0.265293	0.263121	0.222734	0.220887	0.166787	0.165961	0.12799	0.124342
			257.4	0.531314	0.529929	0.493083	0.491954	0.423881	0.423787	0.390492	0.390483		257.4	0.0900938	0.0889909	0.0733415	0.0704386	0.0396652	0.039163	0.0225635	0.0240837		257.4	0.265469	0.263151	0.221873	0.22091	0.166664	0.165972	0.127365	0.124342
			257.6	0.53153	0.529974	0.49357	0.491988	0.424285	0.423817	0.390716	0.390519		257.6	0.0896814	0.0890091	0.0732325	0.0704556	0.0391665	0.0391724	0.0225626	0.024089		257.6	0.265615	0.26318	0.221819	0.220934	0.16637	0.165984	0.12705	0.124342
			257.8	0.531739	0.530018	0.493743	0.492023	0.424606	0.423846	0.390882	0.390555		257.8	0.0894707	0.0890274	0.0727759	0.0704726	0.0388626	0.0391819	0.0226409	0.0240944		257.8	0.265835	0.26321	0.222628	0.220957	0.16651	0.165995	0.126962	0.124342
			258	0.532256	0.530063	0.494285	0.492057	0.425413	0.423875	0.391694	0.390591		258	0.0898609	0.0890456	0.0733721	0.0704895	0.0392763	0.0391913	0.0232323	0.0240997		258	0.2661	0.263239	0.222089	0.22098	0.166774	0.166007	0.127282	0.124342
			258.2	0.532286	0.530107	0.494423	0.492092	0.42593	0.423905	0.391846	0.390627		258.2	0.090415	0.0890638	0.0732597	0.0705065	0.039882	0.0392007	0.0235584	0.0241051		258.2	0.266124	0.263269	0.222742	0.221004	0.167105	0.166018	0.127748	0.124342
			258.4	0.531906	0.530152	0.494425	0.492127	0.425952	0.423934	0.391453	0.390662		258.4	0.0905665	0.089082	0.0727505	0.0705234	0.0397264	0.0392101	0.0231553	0.0241104		258.4	0.265857	0.263298	0.223067	0.221027	0.167332	0.16603	0.127779	0.124342
			258.6	0.5321	0.530196	0.494162	0.492161	0.425706	0.423963	0.391424	0.390698		258.6	0.0909272	0.0891002	0.0728538	0.0705404	0.0399491	0.0392195	0.0234031	0.0241157		258.6	0.265809	0.263328	0.223093	0.221051	0.167373	0.166041	0.128133	0.124342
			258.8	0.53116	0.530241	0.493182	0.492196	0.425053	0.423992	0.390196	0.390734		258.8	0.0905163	0.0891183	0.0726759	0.0705573	0.0401436	0.0392289	0.0232535	0.0241211		258.8	0.265479	0.263357	0.223108	0.221074	0.167693	0.166053	0.128347	0.124342
			259	0.530701	0.530285	0.493453	0.49223	0.424355	0.424021	0.389628	0.390769		259	0.0905243	0.0891365	0.072048	0.0705743	0.0401844	0.0392383	0.022893	0.0241264		259	0.264757	0.263386	0.223122	0.221097	0.16745	0.166064	0.127944	0.124342
			259.2	0.530422	0.53033	0.49387	0.492265	0.424847	0.424051	0.389375	0.390805		259.2	0.0904805	0.0891547	0.0719359	0.0705912	0.0399772	0.0392477	0.0229303	0.0241318		259.2	0.264622	0.263416	0.224083	0.22112	0.168304	0.166076	0.128418	0.124342
			259.4	0.530422	0.530374	0.493958	0.492299	0.424661	0.42408	0.389111	0.39084		259.4	0.0904619	0.0891728	0.0716827	0.0706081	0.0401046	0.0392571	0.0233231	0.0241371		259.4	0.264622	0.263445	0.224308	0.221144	0.168594	0.166087	0.128673	0.124343
			259.6	0.530871	0.530418	0.494204	0.492334	0.424537	0.424109	0.389112	0.390876		259.6	0.0900808	0.089191	0.0715221	0.070625	0.0400443	0.0392665	0.023394	0.0241424		259.6	0.264328	0.263474	0.223931	0.221167	0.168629	0.166099	0.128249	0.124343
			259.8	0.53081	0.530463	0.494073	0.492368	0.424242	0.424138	0.388724	0.390911		259.8	0.0900159	0.0892092	0.0718215	0.070642	0.0400548	0.0392759	0.0234821	0.0241478		259.8	0.264101	0.263504	0.223689	0.22119	0.169172	0.16611	0.128273	0.124343
			260	0.530805	0.530507	0.494097	0.492403	0.424373	0.424167	0.388577	0.390946		260	0.0897055	0.0892273	0.0715704	0.0706589	0.0399072	0.0392853	0.0234204	0.0241531		260	0.264045	0.263533	0.223696	0.221213	0.16902	0.166121	0.128373	0.124343
			260.2	0.530901	0.530551	0.494061	0.492437	0.424297	0.424196	0.388914	0.390982		260.2	0.0897846	0.0892454	0.0720076	0.0706758	0.0397841	0.0392947	0.0234105	0.0241585		260.2	0.263567	0.263562	0.223439	0.221237	0.169076	0.166133	0.12839	0.124343
			260.4	0.531205	0.530595	0.493704	0.492472	0.424401	0.424225	0.389043	0.391017		260.4	0.0899108	0.0892636	0.0720097	0.0706927	0.0396152	0.0393041	0.0234393	0.0241638		260.4	0.263073	0.263591	0.222816	0.22126	0.168793	0.166144	0.127834	0.124343
			260.6	0.531577	0.53064	0.493852	0.492506	0.424827	0.424254	0.389309	0.391052		260.6	0.0898065	0.0892817	0.0721619	0.0707096	0.0398756	0.0393134	0.02387	0.0241691		260.6	0.263201	0.26362	0.223154	0.221283	0.168723	0.166156	0.127757	0.124343
			260.8	0.531775	0.530684	0.493855	0.492541	0.424878	0.424283	0.389227	0.391087		260.8	0.0905347	0.0892998	0.0725899	0.0707265	0.0402434	0.0393228	0.024544	0.0241745		260.8	0.263699	0.26365	0.223219	0.221306	0.168586	0.166167	0.127896	0.124343
			261	0.532054	0.530728	0.493587	0.492575	0.424783	0.424312	0.389302	0.391122		261	0.0905873	0.0893179	0.0728106	0.0707434	0.040321	0.0393322	0.0250073	0.0241798		261	0.264185	0.263679	0.223298	0.221329	0.168798	0.166178	0.127737	0.124343
			261.2	0.532068	0.530772	0.493727	0.49261	0.425094	0.424341	0.389702	0.391157		261.2	0.0902113	0.089336	0.0723965	0.0707603	0.0403426	0.0393416	0.0241339	0.0241852		261.2	0.264045	0.263708	0.223034	0.221353	0.168574	0.16619	0.12739	0.124343
			261.4	0.532307	0.530816	0.493725	0.492644	0.425467	0.42437	0.389891	0.391192		261.4	0.0900761	0.0893541	0.0724984	0.0707772	0.0402068	0.039351	0.023807	0.0241905		261.4	0.264593	0.263737	0.222964	0.221376	0.168612	0.166201	0.127262	0.124343
			261.6	0.532187	0.53086	0.493751	0.492678	0.42507	0.424399	0.389535	0.391227		261.6	0.0896823	0.0893722	0.0725802	0.070794	0.0401368	0.0393604	0.0239217	0.0241958		261.6	0.264824	0.263766	0.223149	0.221399	0.16807	0.166212	0.127652	0.124343
			261.8	0.532587	0.530904	0.493975	0.492713	0.425345	0.424428	0.389846	0.391261		261.8	0.0900402	0.0893903	0.0727885	0.0708109	0.0400988	0.0393698	0.0239189	0.0242012		261.8	0.264933	0.263795	0.223023	0.221422	0.167871	0.166224	0.128335	0.124343
			262	0.532546	0.530949	0.494276	0.492747	0.42585	0.424457	0.390432	0.391296		262	0.0903405	0.0894084	0.0734193	0.0708278	0.0403816	0.0393791	0.0243963	0.0242065		262	0.265162	0.263824	0.222517	0.221445	0.167435	0.166235	0.128393	0.124344
			262.2	0.532682	0.530993	0.494206	0.492781	0.425458	0.424486	0.390043	0.391331		262.2	0.0904715	0.0894265	0.0730648	0.0708447	0.0404206	0.0393885	0.0239953	0.0242119		262.2	0.265481	0.263853	0.222843	0.221468	0.167049	0.166246	0.128294	0.124344
			262.4	0.532769	0.531037	0.494328	0.492816	0.42496	0.424515	0.389927	0.391365		262.4	0.0904491	0.0894446	0.0730616	0.0708615	0.0399872	0.0393979	0.0239964	0.0242172		262.4	0.265276	0.263882	0.222483	0.221491	0.166599	0.166257	0.127947	0.124344
			262.6	0.53275	0.531081	0.494806	0.49285	0.42491	0.424544	0.39008	0.3914		262.6	0.0902132	0.0894626	0.0731624	0.0708784	0.0397907	0.0394073	0.0239075	0.0242225		262.6	0.265721	0.263911	0.223223	0.221514	0.166822	0.166269	0.128405	0.124344
			262.8	0.53197	0.531125	0.494473	0.492884	0.424199	0.424573	0.389429	0.391434		262.8	0.0900653	0.0894807	0.0728477	0.0708952	0.0393898	0.0394167	0.0239399	0.0242279		262.8	0.265525	0.26394	0.223179	0.221537	0.166902	0.16628	0.128472	0.124344
			263	0.53215	0.531169	0.494733	0.492919	0.424242	0.424602	0.389768	0.391469		263	0.0901782	0.0894987	0.0728051	0.0709121	0.0393625	0.039426	0.0240355	0.0242332		263	0.26529	0.263969	0.223322	0.22156	0.166791	0.166291	0.128118	0.124344
			263.2	0.532437	0.531212	0.495173	0.492953	0.424728	0.424631	0.390339	0.391503		263.2	0.0899426	0.0895168	0.0724387	0.0709289	0.0388605	0.0394354	0.0240524	0.0242385		263.2	0.265413	0.263998	0.223214	0.221583	0.166771	0.166302	0.128426	0.124344
			263.4	0.532784	0.531256	0.495064	0.492987	0.424414	0.424659	0.390533	0.391537		263.4	0.0897266	0.0895348	0.072313	0.0709458	0.0385429	0.0394448	0.0237719	0.0242439		263.4	0.265556	0.264027	0.222987	0.221606	0.166863	0.166313	0.128467	0.124344
			263.6	0.533005	0.5313	0.49506	0.493022	0.424377	0.424688	0.390946	0.391572		263.6	0.0895373	0.0895529	0.071946	0.0709626	0.038562	0.0394541	0.0233179	0.0242492		263.6	0.265123	0.264056	0.222841	0.221629	0.166863	0.166324	0.128212	0.124344
			263.8	0.532788	0.531344	0.495296	0.493056	0.42435	0.424717	0.390877	0.391606		263.8	0.089732	0.0895709	0.0723629	0.0709795	0.0382677	0.0394635	0.0229876	0.0242546		263.8	0.26514	0.264085	0.222521	0.221652	0.166962	0.166336	0.128249	0.124344
			264	0.533084	0.531388	0.495014	0.49309	0.424783	0.424746	0.39095	0.39164		264	0.0893809	0.0895889	0.0717484	0.0709963	0.0382895	0.0394729	0.0227493	0.0242599		264	0.264784	0.264113	0.222608	0.221675	0.166624	0.166347	0.128274	0.124344
			264.2	0.533352	0.531432	0.495236	0.493124	0.425241	0.424775	0.391468	0.391674		264.2	0.0894284	0.0896069	0.071396	0.0710131	0.0381716	0.0394823	0.022373	0.0242652		264.2	0.265501	0.264142	0.223541	0.221698	0.167355	0.166358	0.128183	0.124344
			264.4	0.533657	0.531476	0.495435	0.493159	0.425812	0.424803	0.391561	0.391708		264.4	0.0898682	0.0896249	0.0707169	0.0710299	0.0382551	0.0394916	0.0222887	0.0242706		264.4	0.265725	0.264171	0.223611	0.22172	0.167321	0.166369	0.127644	0.124344
			264.6	0.534191	0.531519	0.495272	0.493193	0.4262	0.424832	0.391662	0.391742		264.6	0.089975	0.0896429	0.0703762	0.0710467	0.0386326	0.039501	0.0223941	0.0242759		264.6	0.266212	0.2642	0.223765	0.221743	0.16728	0.16638	0.127505	0.124344
			264.8	0.533879	0.531563	0.49515	0.493227	0.426064	0.424861	0.391566	0.391776		264.8	0.0907329	0.0896609	0.0703741	0.0710636	0.0389794	0.0395103	0.0225103	0.0242812		264.8	0.266596	0.264229	0.22344	0.221766	0.166935	0.166391	0.12691	0.124344
			265	0.533952	0.531607	0.494679	0.493261	0.426009	0.42489	0.391603	0.39181		265	0.0904726	0.0896789	0.0706023	0.0710804	0.0394614	0.0395197	0.0221491	0.0242866		265	0.266271	0.264257	0.222881	0.221789	0.166585	0.166402	0.126868	0.124345
			265.2	0.533762	0.531651	0.494657	0.493295	0.426645	0.424918	0.391901	0.391843		265.2	0.0906554	0.0896969	0.0704285	0.0710972	0.0396995	0.0395291	0.0215513	0.0242919		265.2	0.266055	0.264286	0.222879	0.221812	0.166336	0.166413	0.126817	0.124345
			265.4	0.533738	0.531694	0.494393	0.49333	0.42641	0.424947	0.391666	0.391877		265.4	0.0903825	0.0897149	0.0700719	0.071114	0.0392699	0.0395384	0.0213001	0.0242972		265.4	0.26622	0.264315	0.2227	0.221835	0.166614	0.166424	0.126802	0.124345
			265.6	0.533591	0.531738	0.49422	0.493364	0.426245	0.424976	0.391458	0.391911		265.6	0.0906393	0.0897329	0.0701503	0.0711308	0.0392209	0.0395478	0.0212654	0.0243026		265.6	0.266112	0.264344	0.222382	0.221857	0.16619	0.166436	0.126999	0.124345
			265.8	0.533787	0.531782	0.494351	0.493398	0.427078	0.425004	0.391712	0.391945		265.8	0.0907549	0.0897508	0.0704374	0.0711476	0.0390151	0.0395571	0.0213758	0.0243079		265.8	0.265845	0.264372	0.222152	0.22188	0.166166	0.166447	0.127105	0.124345
			266	0.53325	0.531825	0.494225	0.493432	0.42717	0.425033	0.391653	0.391978		266	0.090782	0.0897688	0.0706002	0.0711643	0.0390194	0.0395665	0.0214164	0.0243132		266	0.265895	0.264401	0.222379	0.221903	0.166111	0.166458	0.126493	0.124345
			266.2	0.533408	0.531869	0.494405	0.493466	0.426812	0.425062	0.39158	0.392012		266.2	0.091108	0.0897867	0.0710375	0.0711811	0.0392815	0.0395758	0.0218058	0.0243186		266.2	0.265737	0.26443	0.222904	0.221926	0.166125	0.166469	0.127021	0.124345
			266.4	0.533096	0.531912	0.494612	0.4935	0.426343	0.42509	0.391899	0.392045		266.4	0.0910275	0.0898047	0.0709631	0.0711979	0.0391008	0.0395852	0.0223802	0.0243239		266.4	0.265658	0.264458	0.222927	0.221948	0.166525	0.16648	0.12716	0.124345
			266.6	0.532257	0.531956	0.494206	0.493534	0.426003	0.425119	0.391358	0.392078		266.6	0.0911359	0.0898226	0.071099	0.0712147	0.0392331	0.0395945	0.0227699	0.0243292		266.6	0.266038	0.264487	0.223551	0.221971	0.167121	0.166491	0.127652	0.124345
			266.8	0.53213	0.532	0.493608	0.493568	0.425574	0.425147	0.391113	0.392112		266.8	0.0909428	0.0898406	0.0710799	0.0712315	0.0394026	0.0396039	0.0233577	0.0243346		266.8	0.265667	0.264515	0.22319	0.221994	0.167037	0.166502	0.127479	0.124345
			267	0.532214	0.532043	0.493459	0.493603	0.425445	0.425176	0.391001	0.392145		267	0.0910632	0.0898585	0.0718396	0.0712482	0.0397017	0.0396132	0.0236645	0.0243399		267	0.265826	0.264544	0.223008	0.222016	0.167069	0.166512	0.12735	0.124345
			267.2	0.532359	0.532087	0.493855	0.493637	0.425338	0.425205	0.390684	0.392178		267.2	0.0906901	0.0898764	0.0720812	0.071265	0.0393157	0.0396226	0.0236172	0.0243452		267.2	0.265584	0.264572	0.222544	0.222039	0.167021	0.166523	0.127191	0.124345
			267.4	0.532548	0.53213	0.494174	0.493671	0.425512	0.425233	0.390689	0.392212		267.4	0.0906895	0.0898943	0.0725605	0.0712817	0.0395406	0.0396319	0.0236702	0.0243506		267.4	0.265396	0.264601	0.222422	0.222062	0.166936	0.166534	0.126899	0.124345
			267.6	0.532882	0.532174	0.49493	0.493705	0.425714	0.425262	0.390941	0.392245		267.6	0.0906803	0.0899122	0.0728606	0.0712985	0.0397657	0.0396413	0.0239818	0.0243559		267.6	0.265372	0.264629	0.222623	0.222084	0.166736	0.166545	0.126798	0.124345
			267.8	0.532826	0.532217	0.495272	0.493739	0.426119	0.42529	0.390868	0.392278		267.8	0.0909741	0.0899301	0.0731549	0.0713152	0.0400358	0.0396506	0.024518	0.0243612		267.8	0.265528	0.264658	0.222398	0.222107	0.166594	0.166556	0.126891	0.124345
			268	0.533121	0.53226	0.495205	0.493773	0.426404	0.425319	0.391112	0.392311		268	0.0908056	0.089948	0.0726569	0.071332	0.0402002	0.03966	0.0247411	0.0243665		268	0.265385	0.264686	0.22218	0.222129	0.166567	0.166567	0.126457	0.124345
			268.2	0.53363	0.532304	0.49622	0.493807	0.42737	0.425347	0.39165	0.392344		268.2	0.0909986	0.0899659	0.0728618	0.0713487	0.0406011	0.0396693	0.0248967	0.0243719		268.2	0.265607	0.264715	0.221734	0.222152	0.16671	0.166578	0.126266	0.124345
			268.4	0.533992	0.532347	0.496508	0.493841	0.427259	0.425376	0.391833	0.392377		268.4	0.091201	0.0899838	0.0725789	0.0713655	0.0405185	0.0396786	0.0252712	0.0243772		268.4	0.265155	0.264743	0.221089	0.222175	0.166196	0.166589	0.126144	0.124346
			268.6	0.534452	0.53239	0.497054	0.493875	0.427474	0.425404	0.392358	0.39241		268.6	0.0909713	0.0900017	0.0724225	0.0713822	0.0407843	0.039688	0.0253097	0.0243825		268.6	0.264681	0.264772	0.22057	0.222197	0.165715	0.1666	0.125784	0.124346
			268.8	0.534544	0.532434	0.497681	0.493909	0.427704	0.425433	0.392406	0.392443		268.8	0.090963	0.0900196	0.0725016	0.0713989	0.0408741	0.0396973	0.0254177	0.0243879		268.8	0.264735	0.2648	0.220187	0.22222	0.165464	0.166611	0.125971	0.124346
			269	0.535351	0.532477	0.4981	0.493943	0.428118	0.425461	0.392591	0.392475		269	0.0908513	0.0900374	0.0729184	0.0714157	0.0409411	0.0397066	0.0255713	0.0243932		269	0.264441	0.264828	0.219968	0.222242	0.165233	0.166621	0.126522	0.124346
			269.2	0.535403	0.53252	0.498327	0.493977	0.428513	0.425489	0.392484	0.392508		269.2	0.090525	0.0900553	0.0725569	0.0714324	0.0408348	0.039716	0.0252989	0.0243985		269.2	0.264375	0.264857	0.220126	0.222265	0.165555	0.166632	0.126543	0.124346
			269.4	0.535582	0.532564	0.498371	0.49401	0.428332	0.425518	0.392585	0.392541		269.4	0.0903774	0.0900732	0.0723064	0.0714491	0.040606	0.0397253	0.0252261	0.0244039		269.4	0.264296	0.264885	0.220155	0.222287	0.16581	0.166643	0.126509	0.124346
			269.6	0.535814	0.532607	0.498425	0.494044	0.428811	0.425546	0.392807	0.392573		269.6	0.0902128	0.090091	0.0725505	0.0714658	0.0402426	0.0397346	0.0247266	0.0244092		269.6	0.264194	0.264913	0.220383	0.22231	0.165974	0.166654	0.126777	0.124346
			269.8	0.535758	0.53265	0.498653	0.494078	0.429316	0.425575	0.393202	0.392606		269.8	0.0898615	0.0901089	0.0724663	0.0714825	0.0396794	0.039744	0.0241655	0.0244145		269.8	0.264464	0.264942	0.220939	0.222332	0.166833	0.166665	0.127388	0.124346
			270	0.535993	0.532693	0.498343	0.494112	0.428868	0.425603	0.393273	0.392638		270	0.0898342	0.0901267	0.0720145	0.0714992	0.039386	0.0397533	0.0237455	0.0244198		270	0.264401	0.26497	0.22124	0.222354	0.167047	0.166675	0.127297	0.124346
			270.2	0.535712	0.532736	0.498001	0.494146	0.428762	0.425631	0.393009	0.392671		270.2	0.0893944	0.0901445	0.0716239	0.0715159	0.0390187	0.0397626	0.0234617	0.0244252		270.2	0.264514	0.264998	0.221753	0.222377	0.166814	0.166686	0.127619	0.124346
			270.4	0.535087	0.53278	0.497418	0.49418	0.428159	0.42566	0.392489	0.392703		270.4	0.0893902	0.0901624	0.0717298	0.0715326	0.0390339	0.0397719	0.0234156	0.0244305		270.4	0.264647	0.265026	0.221475	0.222399	0.166854	0.166697	0.127183	0.124346
			270.6	0.534984	0.532823	0.496957	0.494214	0.427901	0.425688	0.391926	0.392736		270.6	0.0895172	0.0901802	0.0722344	0.0715493	0.0391189	0.0397813	0.0234634	0.0244358		270.6	0.265005	0.265054	0.221734	0.222422	0.16641	0.166708	0.126793	0.124346
			270.8	0.53506	0.532866	0.496771	0.494248	0.427594	0.425716	0.391713	0.392768		270.8	0.0893021	0.090198	0.0724888	0.071566	0.0390889	0.0397906	0.0231877	0.0244411		270.8	0.26541	0.265083	0.222233	0.222444	0.165966	0.166718	0.12645	0.124346
			271	0.5348	0.532909	0.496254	0.494281	0.427212	0.425745	0.391336	0.3928		271	0.0893622	0.0902158	0.0726753	0.0715827	0.0387132	0.0397999	0.0230373	0.0244465		271	0.265581	0.265111	0.222103	0.222466	0.165731	0.166729	0.126576	0.124346
			271.2	0.53471	0.532952	0.496333	0.494315	0.427297	0.425773	0.391231	0.392832		271.2	0.0894982	0.0902336	0.0725343	0.0715993	0.0388065	0.0398092	0.0227278	0.0244518		271.2	0.265625	0.265139	0.222275	0.222489	0.165717	0.16674	0.126082	0.124346
			271.4	0.534932	0.532995	0.496672	0.494349	0.427884	0.425801	0.391856	0.392865		271.4	0.0897438	0.0902514	0.0726675	0.071616	0.0386659	0.0398185	0.0228495	0.0244571		271.4	0.266117	0.265167	0.222035	0.222511	0.165221	0.16675	0.125937	0.124346
			271.6	0.534601	0.533038	0.496466	0.494383	0.427586	0.425829	0.392165	0.392897		271.6	0.0899307	0.0902692	0.0725893	0.0716327	0.0389413	0.0398279	0.0232546	0.0244624		271.6	0.266749	0.265195	0.222508	0.222533	0.165418	0.166761	0.126306	0.124346
			271.8	0.534078	0.533081	0.496086	0.494417	0.427801	0.425858	0.392412	0.392929		271.8	0.0900102	0.090287	0.0723366	0.0716494	0.0390672	0.0398372	0.023317	0.0244678		271.8	0.266566	0.265223	0.221458	0.222556	0.164711	0.166772	0.125763	0.124346
			272	0.534319	0.533124	0.496226	0.49445	0.427565	0.425886	0.392486	0.392961		272	0.0900719	0.0903047	0.072252	0.071666	0.0389955	0.0398465	0.0231265	0.0244731		272	0.266728	0.265251	0.221284	0.222578	0.164552	0.166782	0.125486	0.124346
			272.2	0.534612	0.533167	0.497073	0.494484	0.427787	0.425914	0.392967	0.392993		272.2	0.0900383	0.0903225	0.0720714	0.0716827	0.0392575	0.0398558	0.0231387	0.0244784		272.2	0.266697	0.265279	0.221276	0.2226	0.164576	0.166793	0.125886	0.124347
			272.4	0.534607	0.53321	0.497467	0.494518	0.427296	0.425942	0.393254	0.393025		272.4	0.0903117	0.0903403	0.0718593	0.0716993	0.0391911	0.0398651	0.0234838	0.0244837		272.4	0.266408	0.265307	0.221014	0.222622	0.164276	0.166804	0.12593	0.124347
			272.6	0.534671	0.533253	0.497801	0.494552	0.427632	0.42597	0.39318	0.393057		272.6	0.0904871	0.090358	0.0720237	0.071716	0.0395448	0.0398744	0.0238133	0.0244891		272.6	0.266887	0.265335	0.22128	0.222645	0.164714	0.166814	0.126143	0.124347
			272.8	0.534946	0.533296	0.497745	0.494585	0.427484	0.425999	0.393186	0.393088		272.8	0.0908428	0.0903758	0.0724327	0.0717326	0.0399505	0.0398837	0.0245932	0.0244944		272.8	0.266965	0.265363	0.221513	0.222667	0.164768	0.166825	0.127399	0.124347
			273	0.535326	0.533339	0.497954	0.494619	0.427566	0.426027	0.39339	0.39312		273	0.0906381	0.0903935	0.0724123	0.0717493	0.0395398	0.039893	0.0247828	0.0244997		273	0.266871	0.265391	0.22225	0.222689	0.165235	0.166836	0.127708	0.124347
			273.2	0.535318	0.533381	0.49775	0.494653	0.427281	0.426055	0.393463	0.393152		273.2	0.0907327	0.0904113	0.0725767	0.0717659	0.0395848	0.0399024	0.0248501	0.024505		273.2	0.267144	0.265419	0.22312	0.222711	0.166312	0.166846	0.128464	0.124347
			273.4	0.535473	0.533424	0.498051	0.494687	0.42724	0.426083	0.394006	0.393184		273.4	0.0908961	0.090429	0.0726106	0.0717825	0.039379	0.0399117	0.0247927	0.0245104		273.4	0.267318	0.265447	0.223948	0.222733	0.166888	0.166857	0.128566	0.124347
			273.6	0.535522	0.533467	0.49789	0.49472	0.427041	0.426111	0.394087	0.393215		273.6	0.0907166	0.0904467	0.0727549	0.0717992	0.0392365	0.039921	0.0244634	0.0245157		273.6	0.267717	0.265475	0.22421	0.222755	0.167305	0.166867	0.129161	0.124347
			273.8	0.535383	0.53351	0.497736	0.494754	0.426844	0.426139	0.394209	0.393247		273.8	0.0907686	0.0904645	0.0725592	0.0718158	0.0392853	0.0399303	0.0244776	0.024521		273.8	0.267953	0.265503	0.22433	0.222778	0.167556	0.166878	0.129298	0.124347
			274	0.535474	0.533553	0.497644	0.494788	0.426707	0.426167	0.393826	0.393278		274	0.0905044	0.0904822	0.072574	0.0718324	0.0390675	0.0399396	0.0245144	0.0245263		274	0.267785	0.265531	0.224733	0.2228	0.167206	0.166888	0.128705	0.124347
			274.2	0.535035	0.533595	0.497435	0.494821	0.426716	0.426195	0.39349	0.39331		274.2	0.0900526	0.0904999	0.0728105	0.071849	0.0391259	0.0399489	0.0242974	0.0245317		274.2	0.267999	0.265559	0.225448	0.222822	0.166962	0.166899	0.12887	0.124347
			274.4	0.535214	0.533638	0.497226	0.494855	0.426733	0.426223	0.393251	0.393341		274.4	0.0905816	0.0905176	0.0736209	0.0718656	0.0397133	0.0399582	0.0248314	0.024537		274.4	0.268298	0.265587	0.225674	0.222844	0.167199	0.166909	0.129275	0.124347
			274.6	0.535578	0.533681	0.497534	0.494888	0.42701	0.426251	0.393017	0.393373		274.6	0.0906207	0.0905353	0.0734229	0.0718822	0.0393975	0.0399675	0.0244074	0.0245423		274.6	0.268918	0.265614	0.226011	0.222866	0.167717	0.16692	0.129554	0.124347
			274.8	0.53558	0.533723	0.497471	0.494922	0.427276	0.42628	0.393174	0.393404		274.8	0.0907092	0.090553	0.0734331	0.0718989	0.0393263	0.0399768	0.0241508	0.0245476		274.8	0.269039	0.265642	0.225971	0.222888	0.167777	0.16693	0.129468	0.124347
			275	0.535321	0.533766	0.496919	0.494956	0.427398	0.426308	0.393049	0.393435		275	0.0906125	0.0905707	0.073054	0.0719155	0.0391472	0.039986	0.0240764	0.0245529		275	0.268788	0.26567	0.225252	0.22291	0.167977	0.166941	0.1296	0.124347
			275.2	0.535365	0.533809	0.497067	0.494989	0.427729	0.426336	0.392722	0.393466		275.2	0.0909737	0.0905883	0.0733453	0.071932	0.0394646	0.0399953	0.0241367	0.0245583		275.2	0.269351	0.265698	0.225127	0.222932	0.168043	0.166951	0.129314	0.124347
			275.4	0.535544	0.533851	0.497274	0.495023	0.428021	0.426364	0.39291	0.393498		275.4	0.0909841	0.090606	0.0731415	0.0719486	0.0396254	0.0400046	0.0241837	0.0245636		275.4	0.269376	0.265725	0.224743	0.222954	0.167871	0.166962	0.129615	0.124347
			275.6	0.535326	0.533894	0.497132	0.495056	0.427851	0.426392	0.392815	0.393529		275.6	0.09094	0.0906237	0.072984	0.0719652	0.0399624	0.0400139	0.0239806	0.0245689		275.6	0.269115	0.265753	0.224301	0.222976	0.168057	0.166972	0.129442	0.124347
			275.8	0.535002	0.533936	0.496985	0.49509	0.427765	0.42642	0.392412	0.39356		275.8	0.09095	0.0906414	0.072814	0.0719818	0.0400216	0.0400232	0.0237194	0.0245742		275.8	0.268957	0.265781	0.22319	0.222998	0.167642	0.166983	0.128811	0.124347
			276	0.535079	0.533979	0.49689	0.495123	0.427239	0.426447	0.392093	0.393591		276	0.0907506	0.090659	0.0724233	0.0719984	0.0398966	0.0400325	0.0235205	0.0245795		276	0.268594	0.265809	0.223451	0.22302	0.167711	0.166993	0.128674	0.124347
			276.2	0.534851	0.534022	0.496978	0.495157	0.427205	0.426475	0.391983	0.393622		276.2	0.0907246	0.0906767	0.0721975	0.072015	0.0398905	0.0400418	0.0234068	0.0245849		276.2	0.267685	0.265836	0.222751	0.223042	0.167348	0.167004	0.128107	0.124347
			276.4	0.534985	0.534064	0.496379	0.49519	0.427177	0.426503	0.391531	0.393653		276.4	0.0907068	0.0906943	0.0723538	0.0720315	0.0401562	0.0400511	0.0235821	0.0245902		276.4	0.267152	0.265864	0.222054	0.223064	0.166908	0.167014	0.127632	0.124347
			276.6	0.534861	0.534107	0.496119	0.495224	0.426986	0.426531	0.391523	0.393684		276.6	0.0909088	0.0907119	0.0724214	0.0720481	0.0398517	0.0400604	0.0238196	0.0245955		276.6	0.266982	0.265892	0.222428	0.223086	0.166871	0.167024	0.127443	0.124348
			276.8	0.534913	0.534149	0.496523	0.495257	0.426644	0.426559	0.392108	0.393715		276.8	0.09117	0.0907296	0.0725848	0.0720647	0.0402055	0.0400696	0.0241334	0.0246008		276.8	0.266375	0.265919	0.222515	0.223108	0.166706	0.167035	0.127323	0.124348
			277	0.534731	0.534191	0.496503	0.495291	0.4269	0.426587	0.392334	0.393746		277	0.0908286	0.0907472	0.071998	0.0720812	0.039141	0.0400789	0.0235883	0.0246061		277	0.265851	0.265947	0.22274	0.22313	0.166912	0.167045	0.126498	0.124348
			277.2	0.534745	0.534234	0.496214	0.495324	0.426854	0.426615	0.392614	0.393776		277.2	0.0911288	0.0907648	0.0718446	0.0720978	0.0388803	0.0400882	0.0235806	0.0246115		277.2	0.266007	0.265974	0.222913	0.223151	0.167049	0.167055	0.126391	0.124348
			277.4	0.534523	0.534276	0.4964	0.495358	0.427138	0.426643	0.392947	0.393807		277.4	0.0908779	0.0907824	0.0716296	0.0721143	0.0386172	0.0400975	0.0234323	0.0246168		277.4	0.265799	0.266002	0.223075	0.223173	0.166857	0.167066	0.126234	0.124348
			277.6	0.534275	0.534319	0.496462	0.495391	0.427	0.426671	0.392854	0.393838		277.6	0.0912355	0.0908	0.0720673	0.0721309	0.0389895	0.0401067	0.0238471	0.0246221		277.6	0.265913	0.266029	0.223565	0.223195	0.166496	0.167076	0.126091	0.124348
			277.8	0.534343	0.534361	0.496434	0.495425	0.427118	0.426699	0.393118	0.393868		277.8	0.091651	0.0908176	0.0719932	0.0721474	0.0388888	0.040116	0.0241207	0.0246274		277.8	0.26599	0.266057	0.224189	0.223217	0.166632	0.167086	0.125776	0.124348
			278	0.534663	0.534403	0.496669	0.495458	0.427504	0.426726	0.393204	0.393899		278	0.0917034	0.0908352	0.0720937	0.072164	0.0386476	0.0401253	0.0241404	0.0246327		278	0.266083	0.266084	0.224976	0.223239	0.166678	0.167097	0.125681	0.124348
			278.2	0.534778	0.534446	0.496341	0.495492	0.427335	0.426754	0.393381	0.393929		278.2	0.0918122	0.0908528	0.0720371	0.0721805	0.0389376	0.0401346	0.0241984	0.024638		278.2	0.266138	0.266112	0.225253	0.22326	0.166781	0.167107	0.12621	0.124348
			278.4	0.534921	0.534488	0.496392	0.495525	0.427466	0.426782	0.393594	0.39396		278.4	0.0921817	0.0908704	0.0721937	0.072197	0.0390114	0.0401438	0.0243982	0.0246434		278.4	0.2664	0.266139	0.225077	0.223282	0.166977	0.167117	0.126718	0.124348
			278.6	0.535123	0.53453	0.497094	0.495558	0.427821	0.42681	0.39382	0.39399		278.6	0.092219	0.090888	0.0720848	0.0722136	0.0393462	0.0401531	0.0246266	0.0246487		278.6	0.266866	0.266167	0.225093	0.223304	0.16748	0.167127	0.126926	0.124348
			278.8	0.535234	0.534572	0.497294	0.495592	0.428016	0.426838	0.394124	0.394021		278.8	0.092232	0.0909056	0.0721316	0.0722301	0.0397886	0.0401624	0.0246566	0.024654		278.8	0.267271	0.266194	0.225243	0.223326	0.167618	0.167138	0.127133	0.124348
			279	0.535602	0.534615	0.497327	0.495625	0.428212	0.426865	0.393937	0.394051		279	0.0921027	0.0909231	0.0718552	0.0722466	0.0398851	0.0401716	0.0249534	0.0246593		279	0.267785	0.266222	0.22565	0.223347	0.167935	0.167148	0.12767	0.124348
			279.2	0.536016	0.534657	0.497827	0.495658	0.428123	0.426893	0.39395	0.394082		279.2	0.0923001	0.0909407	0.0720597	0.0722631	0.0402567	0.0401809	0.0250996	0.0246646		279.2	0.268668	0.266249	0.22615	0.223369	0.168318	0.167158	0.127996	0.124348
			279.4	0.536591	0.534699	0.498183	0.495692	0.42816	0.426921	0.394191	0.394112		279.4	0.0923817	0.0909582	0.0721951	0.0722796	0.0410993	0.0401902	0.0253416	0.0246699		279.4	0.268532	0.266276	0.225512	0.223391	0.168181	0.167168	0.128189	0.124348
			279.6	0.536626	0.534741	0.497952	0.495725	0.427859	0.426949	0.393608	0.394142		279.6	0.0923463	0.0909758	0.0724829	0.0722961	0.0414308	0.0401994	0.0252229	0.0246753		279.6	0.268656	0.266304	0.225107	0.223413	0.167958	0.167179	0.127971	0.124348
			279.8	0.536615	0.534783	0.497833	0.495758	0.427892	0.426976	0.393457	0.394172		279.8	0.0920721	0.0909933	0.0726592	0.0723126	0.0414351	0.0402087	0.0251201	0.0246806		279.8	0.268582	0.266331	0.224758	0.223434	0.167124	0.167189	0.127336	0.124348
			280	0.536588	0.534826	0.497646	0.495792	0.42796	0.427004	0.39288	0.394202		280	0.0914233	0.0910109	0.0723494	0.0723291	0.0412427	0.040218	0.0247498	0.0246859		280	0.268064	0.266358	0.224412	0.223456	0.166669	0.167199	0.126733	0.124348
			280.2	0.53671	0.534868	0.497864	0.495825	0.428467	0.427032	0.393043	0.394232		280.2	0.0915694	0.0910284	0.073054	0.0723456	0.041715	0.0402272	0.0247112	0.0246912		280.2	0.267923	0.266386	0.223818	0.223478	0.16636	0.167209	0.126271	0.124348
			280.4	0.536804	0.53491	0.497347	0.495858	0.428513	0.42706	0.39307	0.394263		280.4	0.0913955	0.0910459	0.0732691	0.0723621	0.0417659	0.0402365	0.0245089	0.0246965		280.4	0.268245	0.266413	0.224024	0.223499	0.16653	0.167219	0.126262	0.124348
			280.6	0.536479	0.534952	0.497027	0.495892	0.428399	0.427087	0.393306	0.394293		280.6	0.0918773	0.0910635	0.0735546	0.0723786	0.0417722	0.0402457	0.0246122	0.0247018		280.6	0.268333	0.26644	0.223649	0.223521	0.166446	0.16723	0.126021	0.124348
			280.8	0.536451	0.534994	0.497069	0.495925	0.428845	0.427115	0.393562	0.394323		280.8	0.0916056	0.091081	0.0732157	0.0723951	0.0418599	0.040255	0.0244496	0.0247071		280.8	0.268658	0.266467	0.223933	0.223542	0.166695	0.16724	0.126098	0.124348
			281	0.536495	0.535036	0.496602	0.495958	0.429224	0.427143	0.39383	0.394352		281	0.0912763	0.0910985	0.0728197	0.0724115	0.0413148	0.0402643	0.0237926	0.0247125		281	0.268696	0.266495	0.223802	0.223564	0.166622	0.16725	0.126123	0.124348
			281.2	0.536695	0.535078	0.496728	0.495991	0.429309	0.42717	0.39409	0.394382		281.2	0.091082	0.091116	0.0725836	0.072428	0.0408461	0.0402735	0.0234077	0.0247178		281.2	0.269276	0.266522	0.224114	0.223585	0.166952	0.16726	0.126403	0.124348
			281.4	0.536467	0.53512	0.496581	0.496025	0.429558	0.427198	0.394001	0.394412		281.4	0.0914424	0.0911335	0.0729306	0.0724445	0.0412399	0.0402828	0.0234387	0.0247231		281.4	0.269308	0.266549	0.224305	0.223607	0.166998	0.16727	0.126461	0.124348
			281.6	0.536577	0.535162	0.496777	0.496058	0.429389	0.427225	0.393765	0.394442		281.6	0.0919674	0.091151	0.0733763	0.072461	0.0412607	0.040292	0.0234582	0.0247284		281.6	0.269391	0.266576	0.224596	0.223629	0.166742	0.16728	0.126139	0.124348
			281.8	0.536888	0.535204	0.496873	0.496091	0.429427	0.427253	0.394153	0.394472		281.8	0.0923279	0.0911684	0.0733648	0.0724774	0.0412993	0.0403013	0.0235195	0.0247337		281.8	0.269093	0.266603	0.224532	0.22365	0.166939	0.16729	0.126329	0.124349
			282	0.536409	0.535246	0.496512	0.496124	0.428965	0.427281	0.393885	0.394501		282	0.092342	0.0911859	0.0734779	0.0724939	0.0414046	0.0403105	0.0232014	0.024739		282	0.268882	0.26663	0.224612	0.223672	0.166922	0.1673	0.126622	0.124349
			282.2	0.535921	0.535288	0.495964	0.496157	0.428507	0.427308	0.393835	0.394531		282.2	0.0919977	0.0912034	0.0731588	0.0725103	0.0413146	0.0403197	0.0229684	0.0247443		282.2	0.268452	0.266657	0.224555	0.223693	0.167047	0.16731	0.126823	0.124349
			282.4	0.535731	0.535329	0.496173	0.49619	0.428513	0.427336	0.3942	0.394561		282.4	0.0916982	0.0912209	0.073084	0.0725268	0.0412918	0.040329	0.0228875	0.0247496		282.4	0.268535	0.266684	0.224764	0.223715	0.167416	0.16732	0.127346	0.124349
			282.6	0.535676	0.535371	0.496185	0.496224	0.428295	0.427363	0.394395	0.39459		282.6	0.0913711	0.0912383	0.0729098	0.0725432	0.0415766	0.0403382	0.0230354	0.024755		282.6	0.268681	0.266712	0.225428	0.223736	0.168021	0.16733	0.127759	0.124349
			282.8	0.535872	0.535413	0.496453	0.496257	0.428466	0.427391	0.394872	0.39462		282.8	0.091254	0.0912558	0.072767	0.0725597	0.041192	0.0403475	0.0230197	0.0247603		282.8	0.268411	0.266739	0.225796	0.223757	0.168219	0.16734	0.127633	0.124349
			283	0.535696	0.535455	0.496396	0.49629	0.428229	0.427418	0.394684	0.394649		283	0.091482	0.0912732	0.0729383	0.0725761	0.0408992	0.0403567	0.0232748	0.0247656		283	0.268226	0.266766	0.226166	0.223779	0.168264	0.16735	0.127632	0.124349
			283.2	0.535537	0.535497	0.496671	0.496323	0.427662	0.427446	0.394589	0.394679		283.2	0.0915607	0.0912907	0.0729348	0.0725925	0.0406763	0.040366	0.0233189	0.0247709		283.2	0.267772	0.266793	0.225891	0.2238	0.168254	0.16736	0.12734	0.124349
			283.4	0.536004	0.535538	0.497419	0.496356	0.427736	0.427474	0.39457	0.394708		283.4	0.091538	0.0913081	0.0730785	0.072609	0.0404442	0.0403752	0.0236133	0.0247762		283.4	0.267293	0.26682	0.224914	0.223822	0.167599	0.16737	0.127116	0.124349
			283.6	0.53612	0.53558	0.497943	0.496389	0.427864	0.427501	0.394452	0.394738		283.6	0.0913115	0.0913255	0.0731665	0.0726254	0.0400555	0.0403844	0.0237758	0.0247815		283.6	0.266886	0.266847	0.224397	0.223843	0.167154	0.16738	0.126745	0.124349
			283.8	0.536405	0.535622	0.498572	0.496422	0.428391	0.427529	0.395018	0.394767		283.8	0.0911627	0.0913429	0.0733412	0.0726418	0.0396525	0.0403937	0.0237375	0.0247868		283.8	0.266792	0.266874	0.22418	0.223864	0.166682	0.16739	0.126379	0.124349
			284	0.536493	0.535664	0.498416	0.496455	0.428496	0.427556	0.395111	0.394796		284	0.0909863	0.0913604	0.0733771	0.0726582	0.0397633	0.0404029	0.0236469	0.0247921		284	0.266582	0.2669	0.223867	0.223886	0.166778	0.1674	0.126511	0.124349
			284.2	0.536798	0.535705	0.498906	0.496488	0.428994	0.427584	0.395844	0.394825		284.2	0.0911149	0.0913778	0.0736784	0.0726746	0.0401495	0.0404121	0.0237716	0.0247974		284.2	0.266327	0.266927	0.224119	0.223907	0.166853	0.16741	0.126365	0.124349
			284.4	0.536853	0.535747	0.498693	0.496521	0.428771	0.427611	0.395543	0.394855		284.4	0.09096	0.0913952	0.0732353	0.072691	0.0399115	0.0404214	0.0237142	0.0248027		284.4	0.266118	0.266954	0.223726	0.223928	0.166585	0.16742	0.126203	0.124349
			284.6	0.537019	0.535789	0.498757	0.496554	0.429017	0.427638	0.395563	0.394884		284.6	0.0911148	0.0914126	0.0729964	0.0727074	0.0401557	0.0404306	0.0240482	0.0248081		284.6	0.26598	0.266981	0.223049	0.22395	0.166241	0.16743	0.125872	0.124349
			284.8	0.537167	0.53583	0.499198	0.496588	0.429137	0.427666	0.395789	0.394913		284.8	0.09124	0.09143	0.0733816	0.0727238	0.0407006	0.0404398	0.0240515	0.0248134		284.8	0.265809	0.267008	0.223429	0.223971	0.166265	0.16744	0.125793	0.124349
			285	0.537328	0.535872	0.498978	0.496621	0.42883	0.427693	0.395502	0.394942		285	0.091374	0.0914474	0.0737169	0.0727402	0.0409959	0.0404491	0.0240605	0.0248187		285	0.26581	0.267035	0.222385	0.223992	0.166389	0.16745	0.125675	0.124349
			285.2	0.537345	0.535913	0.499113	0.496654	0.428758	0.427721	0.395339	0.394971		285.2	0.0912103	0.0914647	0.0735957	0.0727566	0.0410717	0.0404583	0.0240881	0.024824		285.2	0.266088	0.267062	0.222174	0.224014	0.166823	0.16746	0.125577	0.124349
			285.4	0.537762	0.535955	0.499121	0.496687	0.429033	0.427748	0.395138	0.395		285.4	0.0916147	0.0914821	0.0742127	0.072773	0.0414694	0.0404675	0.0242755	0.0248293		285.4	0.266305	0.267088	0.222026	0.224035	0.166537	0.16747	0.125364	0.124349
			285.6	0.537814	0.535996	0.499319	0.496719	0.428925	0.427776	0.395013	0.395029		285.6	0.0919286	0.0914995	0.0747918	0.0727894	0.0415395	0.0404767	0.024429	0.0248346		285.6	0.266326	0.267115	0.22195	0.224056	0.166347	0.16748	0.125534	0.124349
			285.8	0.53786	0.536038	0.499179	0.496752	0.42935	0.427803	0.395313	0.395058		285.8	0.0919844	0.0915169	0.0748214	0.0728058	0.0418408	0.040486	0.0244814	0.0248399		285.8	0.26661	0.267142	0.222202	0.224077	0.166595	0.16749	0.126218	0.124349
			286	0.537793	0.536079	0.498975	0.496785	0.429098	0.42783	0.394704	0.395087		286	0.0916978	0.0915342	0.074665	0.0728222	0.0419921	0.0404952	0.0241076	0.0248452		286	0.266509	0.267169	0.221692	0.224098	0.166254	0.167499	0.125931	0.124349
			286.2	0.537942	0.536121	0.499106	0.496818	0.429392	0.427858	0.394677	0.395116		286.2	0.0918956	0.0915516	0.0745509	0.0728385	0.0420345	0.0405044	0.0241964	0.0248505		286.2	0.266473	0.267195	0.221639	0.22412	0.166154	0.167509	0.125863	0.124349
			286.4	0.537694	0.536162	0.499327	0.496851	0.429391	0.427885	0.394532	0.395144		286.4	0.0922625	0.0915689	0.0751236	0.0728549	0.0422512	0.0405136	0.0244817	0.0248558		286.4	0.266411	0.267222	0.221956	0.224141	0.1664	0.167519	0.125872	0.124349
			286.6	0.537709	0.536204	0.499218	0.496884	0.429003	0.427912	0.394485	0.395173		286.6	0.0924397	0.0915863	0.0752837	0.0728713	0.0418693	0.0405228	0.024647	0.0248611		286.6	0.266308	0.267249	0.222444	0.224162	0.166804	0.167529	0.125954	0.124349
			286.8	0.537855	0.536245	0.499834	0.496917	0.429603	0.42794	0.394469	0.395202		286.8	0.0927305	0.0916036	0.0750615	0.0728876	0.041338	0.040532	0.0245835	0.0248664		286.8	0.266536	0.267276	0.222965	0.224183	0.167221	0.167539	0.126027	0.124349
			287	0.537333	0.536287	0.499505	0.49695	0.429186	0.427967	0.393939	0.395231		287	0.0930838	0.0916209	0.0751663	0.072904	0.0411429	0.0405413	0.0247076	0.0248717		287	0.266547	0.267302	0.223552	0.224204	0.167046	0.167548	0.126473	0.124349
			287.2	0.537345	0.536328	0.499956	0.496983	0.429274	0.427994	0.39424	0.395259		287.2	0.0929636	0.0916383	0.0751999	0.0729203	0.0406603	0.0405505	0.0250957	0.024877		287.2	0.267111	0.267329	0.224501	0.224225	0.167485	0.167558	0.127121	0.124349
			287.4	0.537935	0.536369	0.500442	0.497016	0.429891	0.428022	0.394494	0.395288		287.4	0.0928846	0.0916556	0.0748644	0.0729367	0.0401134	0.0405597	0.025032	0.0248823		287.4	0.267601	0.267355	0.224593	0.224246	0.167443	0.167568	0.127733	0.124349
			287.6	0.538285	0.536411	0.500528	0.497049	0.42992	0.428049	0.394495	0.395316		287.6	0.0930657	0.0916729	0.0748569	0.072953	0.0401832	0.0405689	0.024905	0.0248877		287.6	0.267872	0.267382	0.224954	0.224267	0.16749	0.167578	0.128052	0.124349
			287.8	0.538408	0.536452	0.50037	0.497081	0.430142	0.428076	0.394357	0.395345		287.8	0.0928999	0.0916902	0.0746524	0.0729694	0.0402042	0.0405781	0.0244868	0.024893		287.8	0.268414	0.267409	0.225548	0.224289	0.167616	0.167588	0.128859	0.124349
			288	0.538628	0.536493	0.500209	0.497114	0.430188	0.428103	0.394112	0.395373		288	0.0926562	0.0917075	0.0742762	0.0729857	0.0407202	0.0405873	0.0243141	0.0248983		288	0.268736	0.267435	0.225702	0.22431	0.167856	0.167597	0.129072	0.12435
			288.2	0.538307	0.536535	0.500618	0.497147	0.430368	0.428131	0.393977	0.395402		288.2	0.0925143	0.0917248	0.0735692	0.073002	0.0407663	0.0405965	0.0242631	0.0249036		288.2	0.268391	0.267462	0.225541	0.224331	0.168054	0.167607	0.128822	0.12435
			288.4	0.538567	0.536576	0.500645	0.49718	0.43052	0.428158	0.39416	0.39543		288.4	0.0925046	0.0917421	0.0733737	0.0730184	0.0407397	0.0406057	0.0243559	0.0249089		288.4	0.269215	0.267488	0.225604	0.224352	0.168483	0.167617	0.129213	0.12435
			288.6	0.538234	0.536617	0.500449	0.497213	0.430966	0.428185	0.394361	0.395459		288.6	0.0924323	0.0917594	0.073209	0.0730347	0.0413281	0.0406149	0.0241268	0.0249142		288.6	0.269291	0.267515	0.225759	0.224373	0.168809	0.167626	0.129523	0.12435
			288.8	0.537753	0.536658	0.500127	0.497246	0.430522	0.428212	0.394515	0.395487		288.8	0.0921757	0.0917766	0.0729985	0.073051	0.0416069	0.0406241	0.023501	0.0249195		288.8	0.269527	0.267541	0.226139	0.224394	0.169428	0.167636	0.129961	0.12435
			289	0.537331	0.536699	0.499685	0.497278	0.430013	0.42824	0.394407	0.395515		289	0.0917017	0.0917939	0.0720587	0.0730673	0.0413537	0.0406333	0.0233188	0.0249248		289	0.270483	0.267568	0.225882	0.224415	0.169592	0.167646	0.130269	0.12435
			289.2	0.537279	0.536741	0.499717	0.497311	0.430267	0.428267	0.394814	0.395544		289.2	0.0911063	0.0918112	0.0718681	0.0730836	0.0412151	0.0406425	0.0230645	0.0249301		289.2	0.271236	0.267594	0.22609	0.224436	0.169639	0.167655	0.130391	0.12435
			289.4	0.537658	0.536782	0.499478	0.497344	0.430369	0.428294	0.395192	0.395572		289.4	0.0908995	0.0918284	0.0716293	0.0730999	0.0411029	0.0406517	0.0230652	0.0249354		289.4	0.271132	0.267621	0.225783	0.224457	0.16921	0.167665	0.130498	0.12435
			289.6	0.537625	0.536823	0.499294	0.497377	0.430498	0.428321	0.395791	0.3956		289.6	0.0910278	0.0918457	0.0714623	0.0731162	0.0413445	0.0406609	0.0231792	0.0249407		289.6	0.2709	0.267647	0.225602	0.224477	0.16885	0.167675	0.130138	0.12435
			289.8	0.537525	0.536864	0.499536	0.497409	0.431003	0.428348	0.395966	0.395628		289.8	0.0907651	0.0918629	0.0709436	0.0731325	0.0412915	0.0406701	0.0228212	0.024946		289.8	0.270985	0.267674	0.225435	0.224498	0.168541	0.167684	0.130067	0.12435
			290	0.537654	0.536905	0.499769	0.497442	0.430711	0.428375	0.3959	0.395656		290	0.0910815	0.0918802	0.071153	0.0731488	0.041851	0.0406793	0.0228935	0.0249513		290	0.270255	0.2677	0.224831	0.224519	0.168108	0.167694	0.128974	0.12435
			290.2	0.537246	0.536946	0.499275	0.497475	0.429979	0.428403	0.395763	0.395684		290.2	0.0917538	0.0918974	0.0719728	0.0731651	0.0424469	0.0406885	0.023409	0.0249566		290.2	0.26991	0.267726	0.225038	0.22454	0.168027	0.167704	0.128464	0.12435
			290.4	0.53688	0.536987	0.498871	0.497507	0.429301	0.42843	0.395449	0.395712		290.4	0.0919504	0.0919146	0.0724312	0.0731814	0.042601	0.0406977	0.0240217	0.0249619		290.4	0.269366	0.267753	0.225086	0.224561	0.168251	0.167713	0.127724	0.12435
			290.6	0.536777	0.537028	0.49846	0.49754	0.428436	0.428457	0.395258	0.39574		290.6	0.0917615	0.0919319	0.0721935	0.0731977	0.0420011	0.0407069	0.0237806	0.0249672		290.6	0.268952	0.267779	0.225327	0.224582	0.168125	0.167723	0.127579	0.12435
			290.8	0.536868	0.537069	0.498264	0.497573	0.428406	0.428484	0.395246	0.395768		290.8	0.0919066	0.0919491	0.0727423	0.073214	0.0423018	0.0407161	0.0241769	0.0249725		290.8	0.268974	0.267805	0.225561	0.224603	0.168204	0.167732	0.127319	0.12435
			291	0.536267	0.53711	0.49724	0.497606	0.427561	0.428511	0.394906	0.395796		291	0.0919116	0.0919663	0.0732318	0.0732303	0.0423783	0.0407253	0.0245611	0.0249778		291	0.268807	0.267832	0.226207	0.224624	0.168101	0.167742	0.127166	0.12435
			291.2	0.536441	0.537151	0.497321	0.497638	0.42747	0.428538	0.394625	0.395824		291.2	0.0920826	0.0919835	0.0735961	0.0732465	0.0423222	0.0407345	0.024786	0.0249831		291.2	0.269139	0.267858	0.227162	0.224644	0.168479	0.167752	0.127516	0.12435
			291.4	0.536693	0.537192	0.497278	0.497671	0.427572	0.428565	0.394289	0.395852		291.4	0.0926197	0.0920007	0.0737575	0.0732628	0.0418805	0.0407436	0.0246886	0.0249884		291.4	0.268909	0.267884	0.22682	0.224665	0.167985	0.167761	0.126991	0.12435
			291.6	0.536626	0.537233	0.49758	0.497703	0.42693	0.428592	0.393798	0.39588		291.6	0.0928805	0.0920179	0.0743013	0.0732791	0.0421759	0.0407528	0.0253656	0.0249937		291.6	0.269084	0.26791	0.226891	0.224686	0.168242	0.167771	0.127002	0.12435
			291.8	0.536501	0.537274	0.497721	0.497736	0.426997	0.428619	0.393556	0.395907		291.8	0.0927847	0.0920351	0.0747588	0.0732953	0.041735	0.040762	0.025689	0.024999		291.8	0.269303	0.267937	0.226779	0.224707	0.168183	0.16778	0.127021	0.12435
			292	0.536883	0.537315	0.497937	0.497769	0.427162	0.428646	0.393882	0.395935		292	0.0931922	0.0920523	0.0748448	0.0733116	0.0417842	0.0407712	0.0257009	0.0250043		292	0.269577	0.267963	0.226633	0.224728	0.168342	0.16779	0.126954	0.12435
			292.2	0.536894	0.537356	0.498021	0.497801	0.427684	0.428673	0.394027	0.395963		292.2	0.0935125	0.0920695	0.0749919	0.0733278	0.0413979	0.0407804	0.0258442	0.0250096		292.2	0.269536	0.267989	0.226719	0.224748	0.168737	0.167799	0.127172	0.12435
			292.4	0.53726	0.537396	0.498357	0.497834	0.428296	0.4287	0.394544	0.39599		292.4	0.0932479	0.0920866	0.0752334	0.0733441	0.0407426	0.0407895	0.0256542	0.0250149		292.4	0.27037	0.268015	0.226727	0.224769	0.169095	0.167809	0.127584	0.12435
			292.6	0.536848	0.537437	0.498423	0.497866	0.428487	0.428727	0.394387	0.396018		292.6	0.0929793	0.0921038	0.0751793	0.0733603	0.040271	0.0407987	0.0253146	0.0250202		292.6	0.270158	0.268041	0.226972	0.22479	0.169032	0.167818	0.127947	0.12435
			292.8	0.536635	0.537478	0.498363	0.497899	0.428247	0.428755	0.394131	0.396046		292.8	0.0931151	0.092121	0.0749459	0.0733766	0.0397256	0.0408079	0.0249262	0.0250255		292.8	0.270288	0.268067	0.226883	0.22481	0.168636	0.167828	0.128228	0.12435
			293	0.53705	0.537519	0.49879	0.497932	0.429008	0.428782	0.394426	0.396073		293	0.0929375	0.0921381	0.0751543	0.0733928	0.039322	0.0408171	0.0253253	0.0250308		293	0.270229	0.268093	0.226302	0.224831	0.168179	0.167837	0.128177	0.12435
			293.2	0.537193	0.53756	0.498743	0.497964	0.42939	0.428809	0.394699	0.396101		293.2	0.0925401	0.0921553	0.0753412	0.073409	0.0394936	0.0408263	0.0252499	0.0250361		293.2	0.269879	0.26812	0.225823	0.224852	0.167809	0.167847	0.127986	0.12435
			293.4	0.537468	0.5376	0.498952	0.497997	0.429528	0.428835	0.395328	0.396128		293.4	0.0925363	0.0921724	0.0750798	0.0734252	0.0395772	0.0408354	0.0246981	0.0250414		293.4	0.269045	0.268146	0.225339	0.224872	0.16704	0.167856	0.127949	0.12435
			293.6	0.537829	0.537641	0.499212	0.498029	0.430055	0.428862	0.395698	0.396156		293.6	0.0927828	0.0921895	0.0749381	0.0734415	0.0393644	0.0408446	0.0241451	0.0250467		293.6	0.26887	0.268172	0.225729	0.224893	0.166444	0.167866	0.127847	0.12435
			293.8	0.538034	0.537682	0.499674	0.498062	0.430443	0.428889	0.39588	0.396183		293.8	0.0928945	0.0922067	0.0750501	0.0734577	0.0397994	0.0408538	0.0240869	0.025052		293.8	0.268718	0.268198	0.225471	0.224914	0.166279	0.167875	0.12786	0.12435
			294	0.538658	0.537722	0.499845	0.498094	0.430417	0.428916	0.396117	0.39621		294	0.0933059	0.0922238	0.0752439	0.0734739	0.0405234	0.0408629	0.0244788	0.0250573		294	0.268624	0.268224	0.22498	0.224934	0.166017	0.167884	0.127658	0.12435
			294.2	0.538663	0.537763	0.499591	0.498127	0.429962	0.428943	0.395776	0.396238		294.2	0.0934649	0.0922409	0.0755182	0.0734901	0.0412652	0.0408721	0.0246003	0.0250626		294.2	0.268756	0.26825	0.225121	0.224955	0.166013	0.167894	0.127453	0.12435
			294.4	0.538975	0.537804	0.499836	0.498159	0.429977	0.42897	0.395816	0.396265		294.4	0.0931373	0.092258	0.0750196	0.0735063	0.0413988	0.0408813	0.0243711	0.0250679		294.4	0.26902	0.268276	0.225558	0.224975	0.166494	0.167903	0.127331	0.12435
			294.6	0.538996	0.537844	0.49991	0.498192	0.429772	0.428997	0.395908	0.396292		294.6	0.0927299	0.0922751	0.0746076	0.0735225	0.0413105	0.0408904	0.0239529	0.0250732		294.6	0.269192	0.268302	0.225877	0.224996	0.16671	0.167913	0.127751	0.12435
			294.8	0.539031	0.537885	0.499749	0.498224	0.429795	0.429024	0.395913	0.396319		294.8	0.0927916	0.0922922	0.0746187	0.0735387	0.0421049	0.0408996	0.024607	0.0250785		294.8	0.269157	0.268328	0.225829	0.225017	0.166931	0.167922	0.127548	0.12435
			295	0.538862	0.537925	0.499081	0.498256	0.429536	0.429051	0.395287	0.396347		295	0.0927827	0.0923093	0.0742731	0.0735549	0.0422383	0.0409088	0.0245064	0.0250837		295	0.269279	0.268354	0.225831	0.225037	0.166799	0.167931	0.127458	0.12435
			295.2	0.538923	0.537966	0.499285	0.498289	0.430004	0.429078	0.395276	0.396374		295.2	0.0926241	0.0923264	0.074017	0.0735711	0.0418625	0.0409179	0.024722	0.025089		295.2	0.269008	0.26838	0.225997	0.225058	0.166848	0.167941	0.127758	0.12435
			295.4	0.538806	0.538006	0.499533	0.498321	0.430374	0.429105	0.395518	0.396401		295.4	0.0929367	0.0923435	0.0741936	0.0735873	0.0418396	0.0409271	0.0247997	0.0250943		295.4	0.268934	0.268405	0.226224	0.225078	0.167076	0.16795	0.127861	0.12435
			295.6	0.538523	0.538047	0.499522	0.498354	0.430001	0.429132	0.395631	0.396428		295.6	0.0926119	0.0923606	0.0741722	0.0736035	0.0420436	0.0409362	0.0249802	0.0250996		295.6	0.269113	0.268431	0.226382	0.225099	0.167539	0.167959	0.128185	0.12435
			295.8	0.538066	0.538087	0.498677	0.498386	0.430095	0.429158	0.395737	0.396455		295.8	0.0925742	0.0923777	0.0740963	0.0736197	0.041424	0.0409454	0.0243285	0.0251049		295.8	0.268855	0.268457	0.226318	0.225119	0.167475	0.167969	0.127951	0.12435
			296	0.538179	0.538128	0.498488	0.498418	0.430177	0.429185	0.396308	0.396482		296	0.0925294	0.0923947	0.0735392	0.0736359	0.041559	0.0409545	0.0239743	0.0251102		296	0.26898	0.268483	0.226225	0.22514	0.167775	0.167978	0.12853	0.124351
			296.2	0.537801	0.538168	0.49825	0.498451	0.430697	0.429212	0.395937	0.396509		296.2	0.0922235	0.0924118	0.0731416	0.073652	0.0413499	0.0409637	0.0239164	0.0251155		296.2	0.269441	0.268509	0.22654	0.22516	0.168268	0.167987	0.129299	0.124351
			296.4	0.537494	0.538209	0.498027	0.498483	0.430488	0.429239	0.395812	0.396536		296.4	0.0920524	0.0924289	0.0733773	0.0736682	0.0409471	0.0409728	0.0236577	0.0251208		296.4	0.269505	0.268535	0.226959	0.22518	0.168579	0.167997	0.129647	0.124351
			296.6	0.537186	0.538249	0.497677	0.498516	0.430051	0.429266	0.395694	0.396563		296.6	0.0920625	0.0924459	0.0732552	0.0736844	0.0406789	0.040982	0.0235063	0.0251261		296.6	0.269246	0.26856	0.227511	0.225201	0.168644	0.168006	0.130035	0.124351
			296.8	0.536829	0.53829	0.497178	0.498548	0.429684	0.429293	0.395471	0.39659		296.8	0.0923869	0.092463	0.0730907	0.0737005	0.0408078	0.0409911	0.0236181	0.0251314		296.8	0.269148	0.268586	0.227353	0.225221	0.168508	0.168015	0.130469	0.124351
			297	0.537018	0.53833	0.497336	0.49858	0.429916	0.429319	0.395825	0.396617		297	0.0919644	0.09248	0.0731794	0.0737167	0.041043	0.0410003	0.0238887	0.0251367		297	0.269148	0.268612	0.226858	0.225242	0.168423	0.168024	0.130515	0.124351
			297.2	0.536726	0.53837	0.497201	0.498613	0.429345	0.429346	0.396008	0.396643		297.2	0.0916302	0.092497	0.072986	0.0737328	0.0410738	0.0410094	0.0234364	0.025142		297.2	0.269402	0.268638	0.226998	0.225262	0.16813	0.168034	0.130515	0.124351
			297.4	0.537198	0.538411	0.497684	0.498645	0.42973	0.429373	0.396252	0.39667		297.4	0.0922639	0.0925141	0.0728916	0.073749	0.0407078	0.0410186	0.023158	0.0251473		297.4	0.269377	0.268663	0.226695	0.225282	0.167981	0.168043	0.130596	0.124351
			297.6	0.537738	0.538451	0.497813	0.498677	0.43017	0.4294	0.396091	0.396697		297.6	0.0926151	0.0925311	0.0729761	0.0737651	0.0403748	0.0410277	0.0233443	0.0251526		297.6	0.269858	0.268689	0.227004	0.225303	0.168576	0.168052	0.130784	0.124351
			297.8	0.537937	0.538491	0.498161	0.498709	0.430254	0.429427	0.396148	0.396724		297.8	0.0927891	0.0925481	0.0730728	0.0737813	0.0408224	0.0410369	0.0235489	0.0251579		297.8	0.270593	0.268715	0.227121	0.225323	0.169386	0.168061	0.130824	0.124351
			298	0.538251	0.538531	0.498472	0.498742	0.430208	0.429453	0.396095	0.39675		298	0.0934635	0.0925651	0.0732407	0.0737974	0.0412304	0.041046	0.023898	0.0251631		298	0.2708	0.268741	0.226765	0.225343	0.168673	0.168071	0.130582	0.124351
			298.2	0.538599	0.538572	0.4988	0.498774	0.430493	0.42948	0.396339	0.396777		298.2	0.0937752	0.0925821	0.0737839	0.0738135	0.0418298	0.0410552	0.0242308	0.0251684		298.2	0.271301	0.268766	0.227159	0.225364	0.169113	0.16808	0.130325	0.124351
			298.4	0.539006	0.538612	0.499232	0.498806	0.43062	0.429507	0.396561	0.396803		298.4	0.0939054	0.0925991	0.0741792	0.0738297	0.0419922	0.0410643	0.0245201	0.0251737		298.4	0.271933	0.268792	0.227249	0.225384	0.169633	0.168089	0.129827	0.124351
			298.6	0.53956	0.538652	0.49953	0.498838	0.430615	0.429533	0.396432	0.39683		298.6	0.0942325	0.0926161	0.074449	0.0738458	0.0419163	0.0410734	0.0247953	0.025179		298.6	0.271731	0.268817	0.226899	0.225404	0.169638	0.168098	0.129333	0.124351
			298.8	0.539926	0.538692	0.499714	0.498871	0.430806	0.42956	0.39619	0.396857		298.8	0.0943722	0.0926331	0.0745514	0.0738619	0.042462	0.0410826	0.0253078	0.0251843		298.8	0.271292	0.268843	0.226491	0.225425	0.169517	0.168107	0.1284	0.124351
			299	0.540655	0.538733	0.500037	0.498903	0.431464	0.429587	0.396038	0.396883		299	0.0941549	0.0926501	0.0744002	0.073878	0.0422114	0.0410917	0.0252213	0.0251896		299	0.271521	0.268869	0.226296	0.225445	0.16952	0.168116	0.128056	0.124351
			299.2	0.540578	0.538773	0.500314	0.498935	0.431725	0.429614	0.396419	0.39691		299.2	0.0938696	0.092667	0.0748104	0.0738941	0.0420919	0.0411008	0.0252612	0.0251949		299.2	0.270982	0.268894	0.226535	0.225465	0.169548	0.168126	0.127818	0.124351
			299.4	0.540129	0.538813	0.500314	0.498967	0.431847	0.42964	0.396543	0.396936		299.4	0.0942727	0.092684	0.0751879	0.0739103	0.0424196	0.04111	0.0255279	0.0252002		299.4	0.27113	0.26892	0.227155	0.225485	0.169348	0.168135	0.127359	0.124351
			299.6	0.540036	0.538853	0.500369	0.498999	0.431707	0.429667	0.396693	0.396962		299.6	0.0941376	0.092701	0.0750925	0.0739264	0.042492	0.0411191	0.0255091	0.0252055		299.6	0.271218	0.268945	0.227307	0.225506	0.169175	0.168144	0.126496	0.124351
			299.8	0.539886	0.538893	0.500295	0.499032	0.431718	0.429694	0.396561	0.396989		299.8	0.0941247	0.0927179	0.0748766	0.0739425	0.0425082	0.0411282	0.0251292	0.0252108		299.8	0.271191	0.268971	0.227313	0.225526	0.169023	0.168153	0.126088	0.124351
			300	0.539802	0.538933	0.500501	0.499064	0.431429	0.42972	0.396524	0.397015		300	0.0937451	0.0927349	0.074832	0.0739586	0.0423266	0.0411374	0.0251593	0.025216		300	0.271476	0.268996	0.22719	0.225546	0.168718	0.168162	0.126441	0.124351
			300.2	0.53941	0.538973	0.500245	0.499096	0.431251	0.429747	0.395987	0.397041		300.2	0.09386	0.0927518	0.0751051	0.0739747	0.0420387	0.0411465	0.0254189	0.0252213		300.2	0.271654	0.269022	0.227558	0.225566	0.169086	0.168171	0.126924	0.124351
			300.4	0.539071	0.539013	0.499859	0.499128	0.430624	0.429774	0.395806	0.397068		300.4	0.0934795	0.0927688	0.0752219	0.0739907	0.0418661	0.0411556	0.0254833	0.0252266		300.4	0.271094	0.269047	0.227283	0.225586	0.16902	0.16818	0.126402	0.124351
			300.6	0.538982	0.539053	0.499855	0.49916	0.43053	0.4298	0.396454	0.397094		300.6	0.0932115	0.0927857	0.0750437	0.0740068	0.0414624	0.0411647	0.0254485	0.0252319		300.6	0.270522	0.269073	0.22691	0.225606	0.16861	0.168189	0.126498	0.124351
			300.8	0.538466	0.539093	0.499753	0.499192	0.430445	0.429827	0.396457	0.39712		300.8	0.0929949	0.0928027	0.0748417	0.0740229	0.0414718	0.0411739	0.0256257	0.0252372		300.8	0.27049	0.269098	0.226607	0.225626	0.168362	0.168198	0.127038	0.124351
			301	0.538541	0.539133	0.500282	0.499224	0.43086	0.429853	0.396862	0.397146		301	0.0924483	0.0928196	0.0749544	0.074039	0.0409453	0.041183	0.0253684	0.0252425		301	0.270094	0.269123	0.226023	0.225647	0.167934	0.168207	0.126863	0.124351
			301.2	0.538476	0.539173	0.50038	0.499256	0.430742	0.42988	0.396892	0.397172		301.2	0.0922589	0.0928365	0.0748443	0.0740551	0.0401953	0.0411921	0.0254336	0.0252478		301.2	0.270137	0.269149	0.226314	0.225667	0.168244	0.168216	0.127012	0.124351
			301.4	0.538362	0.539213	0.500437	0.499289	0.430863	0.429907	0.396423	0.397199		301.4	0.0925931	0.0928534	0.0749159	0.0740711	0.039732	0.0412012	0.0253144	0.0252531		301.4	0.269971	0.269174	0.226195	0.225687	0.168804	0.168226	0.127096	0.124351
			301.6	0.538161	0.539253	0.499839	0.499321	0.430548	0.429933	0.395929	0.397225		301.6	0.0921435	0.0928703	0.0750501	0.0740872	0.039663	0.0412104	0.0250306	0.0252583		301.6	0.270065	0.2692	0.226557	0.225707	0.168833	0.168235	0.126983	0.124351
			301.8	0.537982	0.539293	0.499874	0.499353	0.43037	0.42996	0.396308	0.397251		301.8	0.0917442	0.0928872	0.0745303	0.0741033	0.0399368	0.0412195	0.0248066	0.0252636		301.8	0.269743	0.269225	0.22663	0.225727	0.168602	0.168244	0.126574	0.124351
			302	0.538163	0.539333	0.500206	0.499385	0.430445	0.429986	0.396746	0.397277		302	0.0917524	0.0929041	0.0741111	0.0741193	0.0399342	0.0412286	0.0246168	0.0252689		302	0.268917	0.26925	0.226019	0.225747	0.167898	0.168253	0.125953	0.124351
			302.2	0.538659	0.539372	0.500471	0.499417	0.430815	0.430013	0.397358	0.397303		302.2	0.0919332	0.092921	0.074259	0.0741354	0.0402939	0.0412377	0.0247193	0.0252742		302.2	0.269104	0.269276	0.226278	0.225767	0.168555	0.168262	0.125932	0.124351
			302.4	0.53921	0.539412	0.500859	0.499449	0.430722	0.430039	0.397589	0.397329		302.4	0.0917356	0.0929379	0.074213	0.0741514	0.0401929	0.0412468	0.0244077	0.0252795		302.4	0.269032	0.269301	0.226439	0.225787	0.168782	0.168271	0.125916	0.124351
			302.6	0.539918	0.539452	0.501139	0.499481	0.430774	0.430066	0.397553	0.397355		302.6	0.0916026	0.0929548	0.0739025	0.0741675	0.0402831	0.0412559	0.0244339	0.0252848		302.6	0.268743	0.269326	0.226789	0.225807	0.168525	0.168279	0.126082	0.124351
			302.8	0.540147	0.539492	0.501262	0.499513	0.431077	0.430093	0.397859	0.39738		302.8	0.0912046	0.0929716	0.0730022	0.0741835	0.040596	0.041265	0.0242585	0.0252901		302.8	0.269251	0.269351	0.226847	0.225827	0.168589	0.168288	0.126388	0.124351
			303	0.540422	0.539532	0.501137	0.499545	0.431491	0.430119	0.39777	0.397406		303	0.0915423	0.0929885	0.0728138	0.0741996	0.040883	0.0412741	0.0246229	0.0252953		303	0.269562	0.269377	0.226874	0.225847	0.168428	0.168297	0.126705	0.124351
			303.2	0.540131	0.539571	0.500993	0.499577	0.43145	0.430146	0.397826	0.397432		303.2	0.0917611	0.0930054	0.0730148	0.0742156	0.0408492	0.0412833	0.0249279	0.0253006		303.2	0.269371	0.269402	0.226773	0.225867	0.168011	0.168306	0.126473	0.124351
			303.4	0.539921	0.539611	0.501032	0.499609	0.431313	0.430172	0.397626	0.397458		303.4	0.0922896	0.0930222	0.0730028	0.0742316	0.0410317	0.0412924	0.0251809	0.0253059		303.4	0.26949	0.269427	0.227049	0.225887	0.167841	0.168315	0.126168	0.124351
			303.6	0.540085	0.539651	0.501448	0.499641	0.431221	0.430199	0.397658	0.397484		303.6	0.0926175	0.0930391	0.0733034	0.0742476	0.0415543	0.0413015	0.0252678	0.0253112		303.6	0.269712	0.269452	0.226713	0.225907	0.167938	0.168324	0.12634	0.124351
			303.8	0.53984	0.53969	0.501144	0.499673	0.430879	0.430225	0.39722	0.397509		303.8	0.0926411	0.0930559	0.0735077	0.0742637	0.0417293	0.0413106	0.0251284	0.0253165		303.8	0.269733	0.269477	0.226303	0.225927	0.167679	0.168333	0.126599	0.124351
			304	0.539585	0.53973	0.500607	0.499704	0.430466	0.430251	0.397318	0.397535		304	0.0928776	0.0930728	0.0738006	0.0742797	0.0415078	0.0413197	0.0255598	0.0253218		304	0.269588	0.269503	0.225823	0.225947	0.167462	0.168342	0.126964	0.124351
			304.2	0.539699	0.53977	0.500658	0.499736	0.430523	0.430278	0.397874	0.397561		304.2	0.0932014	0.0930896	0.0736705	0.0742957	0.0412151	0.0413288	0.0259994	0.025327		304.2	0.269589	0.269528	0.22555	0.225966	0.16739	0.168351	0.12718	0.124351
			304.4	0.539446	0.539809	0.500376	0.499768	0.430629	0.430304	0.397886	0.397586		304.4	0.0929325	0.0931064	0.0734983	0.0743117	0.0413955	0.0413379	0.0258724	0.0253323		304.4	0.26958	0.269553	0.225616	0.225986	0.167357	0.16836	0.127394	0.124351
			304.6	0.539271	0.539849	0.500096	0.4998	0.430332	0.430331	0.397801	0.397612		304.6	0.0934683	0.0931232	0.0736522	0.0743277	0.0412238	0.041347	0.0258646	0.0253376		304.6	0.269507	0.269578	0.225647	0.226006	0.16711	0.168369	0.127811	0.124351
			304.8	0.538762	0.539889	0.500214	0.499832	0.430341	0.430357	0.397165	0.397638		304.8	0.0935834	0.0931401	0.0735841	0.0743437	0.0410944	0.0413561	0.0260406	0.0253429		304.8	0.269634	0.269603	0.225561	0.226026	0.167379	0.168378	0.128364	0.124351
			305	0.538474	0.539928	0.500294	0.499864	0.430262	0.430384	0.396908	0.397663		305	0.0934203	0.0931569	0.0737119	0.0743597	0.0408364	0.0413652	0.0255748	0.0253482		305	0.269609	0.269628	0.225505	0.226046	0.167414	0.168386	0.128371	0.124351
			305.2	0.538214	0.539968	0.499966	0.499896	0.42962	0.43041	0.396128	0.397689		305.2	0.0936101	0.0931737	0.0741498	0.0743757	0.0412159	0.0413743	0.025852	0.0253535		305.2	0.269624	0.269653	0.225798	0.226066	0.168086	0.168395	0.128801	0.124351
			305.4	0.53847	0.540007	0.500002	0.499928	0.42941	0.430437	0.396169	0.397714		305.4	0.0934344	0.0931905	0.0740348	0.0743917	0.0408932	0.0413834	0.0249817	0.0253587		305.4	0.269284	0.269678	0.226137	0.226085	0.168418	0.168404	0.128679	0.124351
			305.6	0.538292	0.540047	0.499843	0.49996	0.429012	0.430463	0.39592	0.39774		305.6	0.0929844	0.0932073	0.0739632	0.0744077	0.0406556	0.0413924	0.0245175	0.025364		305.6	0.269172	0.269703	0.226134	0.226105	0.167986	0.168413	0.128415	0.124351
			305.8	0.53833	0.540086	0.499903	0.499991	0.428801	0.430489	0.396008	0.397765		305.8	0.0928184	0.0932241	0.0738396	0.0744237	0.0409458	0.0414015	0.0241579	0.0253693		305.8	0.268904	0.269728	0.226373	0.226125	0.168673	0.168422	0.128511	0.124351
			306	0.5386	0.540126	0.500113	0.500023	0.428757	0.430516	0.395718	0.39779		306	0.0926295	0.0932408	0.0738308	0.0744397	0.040847	0.0414106	0.0240787	0.0253746		306	0.268756	0.269753	0.226211	0.226145	0.169054	0.16843	0.12837	0.124351
			306.2	0.539205	0.540165	0.500045	0.500055	0.42881	0.430542	0.395629	0.397816		306.2	0.092951	0.0932576	0.0744472	0.0744556	0.0414357	0.0414197	0.0242329	0.0253799		306.2	0.269399	0.269778	0.226658	0.226165	0.169396	0.168439	0.128701	0.124351
			306.4	0.539679	0.540205	0.500306	0.500087	0.429082	0.430568	0.395529	0.397841		306.4	0.092692	0.0932744	0.074603	0.0744716	0.0413623	0.0414288	0.0237954	0.0253851		306.4	0.269601	0.269803	0.226769	0.226184	0.169603	0.168448	0.129015	0.124351
			306.6	0.540091	0.540244	0.500453	0.500119	0.429312	0.430595	0.39563	0.397866		306.6	0.0929358	0.0932912	0.07442	0.0744876	0.0414838	0.0414379	0.0238643	0.0253904		306.6	0.270058	0.269828	0.226931	0.226204	0.169856	0.168457	0.129335	0.124351
			306.8	0.540395	0.540283	0.500724	0.50015	0.429808	0.430621	0.395716	0.397892		306.8	0.0931029	0.0933079	0.0743123	0.0745036	0.0418672	0.041447	0.024021	0.0253957		306.8	0.270334	0.269853	0.226803	0.226224	0.170212	0.168466	0.129537	0.124351
			307	0.540431	0.540323	0.501094	0.500182	0.430474	0.430648	0.395418	0.397917		307	0.0935378	0.0933247	0.0746535	0.0745195	0.0419827	0.0414561	0.0245858	0.025401		307	0.270221	0.269878	0.226341	0.226243	0.170023	0.168474	0.12899	0.124352
			307.2	0.540496	0.540362	0.501301	0.500214	0.430762	0.430674	0.395818	0.397942		307.2	0.0932923	0.0933414	0.0743712	0.0745355	0.0416679	0.0414651	0.0243581	0.0254063		307.2	0.269681	0.269903	0.225656	0.226263	0.169868	0.168483	0.128087	0.124352
			307.4	0.54044	0.540401	0.50156	0.500246	0.431043	0.4307	0.396314	0.397967		307.4	0.0933625	0.0933582	0.0747882	0.0745514	0.0422103	0.0414742	0.0245887	0.0254115		307.4	0.269452	0.269927	0.225708	0.226283	0.169627	0.168492	0.127723	0.124352
			307.6	0.540544	0.540441	0.501853	0.500277	0.431493	0.430726	0.396735	0.397993		307.6	0.0935989	0.0933749	0.0751977	0.0745674	0.0425463	0.0414833	0.0248056	0.0254168		307.6	0.26973	0.269952	0.225365	0.226302	0.169742	0.168501	0.127773	0.124352
			307.8	0.540821	0.54048	0.50163	0.500309	0.431707	0.430753	0.397236	0.398018		307.8	0.0936276	0.0933916	0.0749949	0.0745833	0.0424247	0.0414924	0.024679	0.0254221		307.8	0.269522	0.269977	0.225527	0.226322	0.169253	0.168509	0.127721	0.124352
			308	0.540884	0.540519	0.501823	0.500341	0.43176	0.430779	0.398223	0.398043		308	0.093787	0.0934084	0.0748062	0.0745993	0.0420868	0.0415015	0.0249916	0.0254274		308	0.269736	0.270002	0.225838	0.226342	0.169082	0.168518	0.127346	0.124352
			308.2	0.541276	0.540558	0.50202	0.500372	0.432178	0.430805	0.398598	0.398068		308.2	0.0936891	0.0934251	0.0748585	0.0746152	0.0418768	0.0415105	0.025109	0.0254327		308.2	0.26967	0.270027	0.225762	0.226361	0.168197	0.168527	0.126719	0.124352
			308.4	0.540948	0.540598	0.501529	0.500404	0.43219	0.430832	0.398172	0.398093		308.4	0.0934173	0.0934418	0.0746091	0.0746311	0.0415128	0.0415196	0.0245539	0.0254379		308.4	0.269487	0.270051	0.2264	0.226381	0.167284	0.168535	0.126336	0.124352
			308.6	0.541057	0.540637	0.501872	0.500436	0.432265	0.430858	0.398297	0.398118		308.6	0.0934389	0.0934585	0.0744525	0.0746471	0.0410608	0.0415287	0.0242736	0.0254432		308.6	0.268838	0.270076	0.225973	0.2264	0.166856	0.168544	0.125602	0.124352
			308.8	0.540893	0.540676	0.501945	0.500467	0.432409	0.430884	0.398451	0.398143		308.8	0.0932784	0.0934752	0.0744026	0.074663	0.0408973	0.0415377	0.0237193	0.0254485		308.8	0.268604	0.270101	0.226056	0.22642	0.166826	0.168553	0.125594	0.124352
			309	0.540732	0.540715	0.501797	0.500499	0.431936	0.43091	0.398232	0.398168		309	0.0929973	0.0934919	0.0748215	0.0746789	0.0408733	0.0415468	0.0230269	0.0254538		309	0.268766	0.270126	0.226676	0.226439	0.166554	0.168561	0.125462	0.124352
			309.2	0.540993	0.540754	0.501633	0.500531	0.431371	0.430937	0.397996	0.398193		309.2	0.0929395	0.0935086	0.0753576	0.0746948	0.0406307	0.0415559	0.023173	0.025459		309.2	0.269194	0.27015	0.227211	0.226459	0.16657	0.16857	0.125774	0.124352
			309.4	0.541536	0.540794	0.501872	0.500562	0.431433	0.430963	0.398054	0.398218		309.4	0.0927697	0.0935253	0.0753302	0.0747107	0.0401657	0.041565	0.0225225	0.0254643		309.4	0.269549	0.270175	0.227482	0.226479	0.166403	0.168579	0.12628	0.124352
			309.6	0.541308	0.540833	0.501491	0.500594	0.431504	0.430989	0.397241	0.398243		309.6	0.0928946	0.093542	0.0758863	0.0747267	0.0401788	0.041574	0.0224192	0.0254696		309.6	0.269816	0.2702	0.227452	0.226498	0.166225	0.168587	0.126236	0.124352
			309.8	0.541081	0.540872	0.500955	0.500626	0.431049	0.431015	0.396657	0.398267		309.8	0.0928424	0.0935586	0.0762916	0.0747426	0.0406497	0.0415831	0.0223707	0.0254749		309.8	0.270127	0.270224	0.227941	0.226518	0.166604	0.168596	0.12646	0.124352
			310	0.541336	0.540911	0.501577	0.500657	0.431245	0.431042	0.396552	0.398292		310	0.0931246	0.0935753	0.0762971	0.0747585	0.0407959	0.0415922	0.0228653	0.0254801		310	0.270111	0.270249	0.227748	0.226537	0.166829	0.168604	0.126264	0.124352
			310.2	0.541229	0.54095	0.501444	0.500689	0.431335	0.431068	0.396633	0.398317		310.2	0.0936707	0.093592	0.0761857	0.0747744	0.0407838	0.0416012	0.0224165	0.0254854		310.2	0.270853	0.270274	0.228176	0.226557	0.167632	0.168613	0.127002	0.124352
			310.4	0.541204	0.540989	0.501785	0.50072	0.43183	0.431094	0.396768	0.398342		310.4	0.0935837	0.0936086	0.0758599	0.0747903	0.0404976	0.0416103	0.0220518	0.0254907		310.4	0.271027	0.270298	0.228693	0.226576	0.168279	0.168622	0.127655	0.124352
			310.6	0.541305	0.541028	0.502133	0.500752	0.431849	0.43112	0.396947	0.398366		310.6	0.0938885	0.0936253	0.0752361	0.0748062	0.0405789	0.0416193	0.0226592	0.025496		310.6	0.271458	0.270323	0.229142	0.226595	0.168841	0.16863	0.128368	0.124352
			310.8	0.541123	0.541067	0.502113	0.500783	0.432236	0.431146	0.39673	0.398391		310.8	0.0940012	0.0936419	0.0752892	0.074822	0.0409838	0.0416284	0.0233304	0.0255012		310.8	0.271554	0.270347	0.229352	0.226615	0.168993	0.168639	0.128527	0.124352
			311	0.540942	0.541106	0.502245	0.500815	0.432149	0.431172	0.396709	0.398416		311	0.0943935	0.0936586	0.0748466	0.0748379	0.0410777	0.0416374	0.0236875	0.0255065		311	0.271456	0.270372	0.22885	0.226634	0.168603	0.168647	0.12814	0.124352
			311.2	0.541161	0.541145	0.50209	0.500847	0.432076	0.431199	0.397286	0.39844		311.2	0.0945071	0.0936752	0.0745328	0.0748538	0.0413483	0.0416465	0.0243166	0.0255118		311.2	0.271533	0.270396	0.229013	0.226654	0.16959	0.168656	0.128534	0.124352
			311.4	0.540834	0.541184	0.50193	0.500878	0.431744	0.431225	0.397297	0.398465		311.4	0.094922	0.0936918	0.0747952	0.0748697	0.0420644	0.0416556	0.0254345	0.0255171		311.4	0.271382	0.270421	0.228664	0.226673	0.169773	0.168664	0.128616	0.124352
			311.6	0.540968	0.541223	0.501992	0.50091	0.431387	0.431251	0.397507	0.39849		311.6	0.0955276	0.0937085	0.0745548	0.0748856	0.0421395	0.0416646	0.0259454	0.0255223		311.6	0.271491	0.270445	0.228182	0.226692	0.169653	0.168673	0.128607	0.124352
			311.8	0.54122	0.541262	0.50174	0.500941	0.431688	0.431277	0.398393	0.398514		311.8	0.0953473	0.0937251	0.0740498	0.0749014	0.0419301	0.0416737	0.026458	0.0255276		311.8	0.271835	0.27047	0.228508	0.226712	0.169795	0.168682	0.128857	0.124352
			312	0.541084	0.5413	0.501784	0.500973	0.431431	0.431303	0.398658	0.398539		312	0.0951758	0.0937417	0.074047	0.0749173	0.0419926	0.0416827	0.0268213	0.0255329		312	0.272032	0.270494	0.228545	0.226731	0.169493	0.16869	0.128552	0.124352
			312.2	0.541157	0.541339	0.501562	0.501004	0.431261	0.431329	0.398684	0.398563		312.2	0.0949881	0.0937583	0.0738416	0.0749331	0.0422581	0.0416918	0.0269254	0.0255382		312.2	0.271796	0.270519	0.228706	0.22675	0.168929	0.168699	0.12843	0.124352
			312.4	0.540932	0.541378	0.501595	0.501035	0.431423	0.431355	0.399124	0.398588		312.4	0.0945048	0.0937749	0.0735949	0.074949	0.0419076	0.0417008	0.0266591	0.0255434		312.4	0.271716	0.270543	0.22926	0.22677	0.168913	0.168707	0.128596	0.124352
			312.6	0.540978	0.541417	0.501952	0.501067	0.431498	0.431381	0.399275	0.398612		312.6	0.0943053	0.0937915	0.0735599	0.0749649	0.0418193	0.0417099	0.0263201	0.0255487		312.6	0.271412	0.270568	0.228839	0.226789	0.169533	0.168715	0.128324	0.124352
			312.8	0.540614	0.541456	0.501589	0.501098	0.431445	0.431408	0.398884	0.398637		312.8	0.0942227	0.0938081	0.0737795	0.0749807	0.0418816	0.0417189	0.0258517	0.025554		312.8	0.271771	0.270592	0.229069	0.226808	0.169748	0.168724	0.128386	0.124352
			313	0.540692	0.541495	0.501981	0.50113	0.431445	0.431434	0.398864	0.398661		313	0.0940033	0.0938247	0.0741123	0.0749965	0.04173	0.041728	0.0258001	0.0255592		313	0.271901	0.270616	0.22916	0.226828	0.169628	0.168732	0.128137	0.124352
			313.2	0.540953	0.541533	0.502381	0.501161	0.431558	0.43146	0.399199	0.398685		313.2	0.0938471	0.0938413	0.074355	0.0750124	0.0417056	0.041737	0.0258667	0.0255645		313.2	0.272519	0.270641	0.22905	0.226847	0.169617	0.168741	0.128656	0.124352
			313.4	0.541069	0.541572	0.502316	0.501193	0.431877	0.431486	0.399168	0.39871		313.4	0.0938643	0.0938578	0.0744429	0.0750282	0.042032	0.041746	0.0252625	0.0255698		313.4	0.272485	0.270665	0.229244	0.226866	0.169412	0.168749	0.129032	0.124352
			313.6	0.541051	0.541611	0.502321	0.501224	0.43228	0.431512	0.398945	0.398734		313.6	0.0940779	0.0938744	0.0747186	0.0750441	0.042319	0.0417551	0.0250578	0.0255751		313.6	0.272458	0.270689	0.229116	0.226885	0.169482	0.168758	0.128807	0.124352
			313.8	0.540826	0.541649	0.502481	0.501255	0.432139	0.431538	0.398949	0.398758		313.8	0.0939876	0.093891	0.0748433	0.0750599	0.042323	0.0417641	0.0248884	0.0255803		313.8	0.272159	0.270714	0.228924	0.226905	0.169307	0.168766	0.128602	0.124352
			314	0.541067	0.541688	0.502867	0.501287	0.432369	0.431564	0.398703	0.398783		314	0.0940522	0.0939075	0.0748854	0.0750757	0.0426024	0.0417732	0.0248067	0.0255856		314	0.271649	0.270738	0.228654	0.226924	0.168962	0.168775	0.12819	0.124352
			314.2	0.540645	0.541727	0.502865	0.501318	0.432609	0.43159	0.398202	0.398807		314.2	0.0938776	0.0939241	0.0747098	0.0750915	0.0423401	0.0417822	0.02417	0.0255909		314.2	0.271488	0.270762	0.228736	0.226943	0.169074	0.168783	0.128358	0.124352
			314.4	0.540708	0.541765	0.503004	0.50135	0.432715	0.431616	0.397804	0.398831		314.4	0.0936418	0.0939406	0.0746545	0.0751074	0.0420911	0.0417912	0.0239725	0.0255961		314.4	0.270985	0.270787	0.228385	0.226962	0.168865	0.168791	0.12763	0.124352
			314.6	0.54111	0.541804	0.50309	0.501381	0.432692	0.431642	0.397539	0.398855		314.6	0.0940729	0.0939572	0.0747582	0.0751232	0.042387	0.0418003	0.0244241	0.0256014		314.6	0.271063	0.270811	0.228213	0.226981	0.168701	0.1688	0.127407	0.124352
			314.8	0.541417	0.541843	0.503025	0.501412	0.433172	0.431668	0.397451	0.398879		314.8	0.0941133	0.0939737	0.0753928	0.075139	0.0426197	0.0418093	0.024883	0.0256067		314.8	0.270515	0.270835	0.227536	0.227001	0.168217	0.168808	0.126687	0.124352
			315	0.542062	0.541881	0.50336	0.501444	0.433321	0.431694	0.397863	0.398904		315	0.0946017	0.0939902	0.0756576	0.0751548	0.0425119	0.0418183	0.0252518	0.025612		315	0.270438	0.270859	0.226797	0.22702	0.168189	0.168817	0.126229	0.124352
			315.2	0.54267	0.54192	0.503297	0.501475	0.433451	0.43172	0.398253	0.398928		315.2	0.0949251	0.0940068	0.0762108	0.0751706	0.0428999	0.0418274	0.0260932	0.0256172		315.2	0.270379	0.270884	0.226339	0.227039	0.168837	0.168825	0.126231	0.124352
			315.4	0.542623	0.541958	0.503024	0.501506	0.43301	0.431746	0.398085	0.398952		315.4	0.0952977	0.0940233	0.0762742	0.0751864	0.0431506	0.0418364	0.0264379	0.0256225		315.4	0.270265	0.270908	0.225712	0.227058	0.168509	0.168833	0.126003	0.124352
			315.6	0.54289	0.541997	0.503018	0.501537	0.433187	0.431772	0.398211	0.398976		315.6	0.0950851	0.0940398	0.0763193	0.0752022	0.0428219	0.0418454	0.0261893	0.0256278		315.6	0.270656	0.270932	0.225823	0.227077	0.168366	0.168842	0.126345	0.124352
			315.8	0.543171	0.542035	0.502467	0.501569	0.433213	0.431798	0.398625	0.399		315.8	0.0948421	0.0940563	0.0767786	0.075218	0.0426271	0.0418544	0.0260324	0.025633		315.8	0.270949	0.270956	0.225548	0.227096	0.168696	0.16885	0.126692	0.124352
			316	0.543099	0.542074	0.502315	0.5016	0.432934	0.431824	0.398569	0.399024		316	0.0946527	0.0940728	0.0770851	0.0752338	0.0428456	0.0418635	0.0260533	0.0256383		316	0.270464	0.27098	0.225173	0.227115	0.16789	0.168858	0.126951	0.124352
			316.2	0.542998	0.542112	0.502333	0.501631	0.432725	0.43185	0.39882	0.399048		316.2	0.0945137	0.0940893	0.0769126	0.0752496	0.0426786	0.0418725	0.0259361	0.0256436		316.2	0.27048	0.271004	0.224946	0.227134	0.168049	0.168867	0.126841	0.124352
			316.4	0.543095	0.542151	0.502847	0.501662	0.432762	0.431876	0.399233	0.399072		316.4	0.09433	0.0941058	0.0770329	0.0752653	0.0420672	0.0418815	0.0252188	0.0256488		316.4	0.270644	0.271028	0.224996	0.227153	0.168437	0.168875	0.127235	0.124352
			316.6	0.543024	0.542189	0.502722	0.501694	0.432611	0.431902	0.399009	0.399096		316.6	0.0943455	0.0941223	0.0768864	0.0752811	0.0417121	0.0418905	0.0249789	0.0256541		316.6	0.270362	0.271052	0.224347	0.227172	0.16813	0.168883	0.126799	0.124352
			316.8	0.54286	0.542228	0.50232	0.501725	0.432422	0.431928	0.399285	0.39912		316.8	0.094513	0.0941388	0.0769023	0.0752969	0.0418015	0.0418995	0.0251946	0.0256594		316.8	0.270594	0.271077	0.224395	0.227191	0.168497	0.168891	0.127073	0.124352
			317	0.542769	0.542266	0.502082	0.501756	0.432071	0.431954	0.399842	0.399143		317	0.0942825	0.0941552	0.076953	0.0753126	0.0417119	0.0419086	0.0252296	0.0256646		317	0.271113	0.271101	0.224732	0.22721	0.168439	0.1689	0.127656	0.124352
			317.2	0.542668	0.542304	0.501743	0.501787	0.431988	0.431979	0.399858	0.399167		317.2	0.0943772	0.0941717	0.0770842	0.0753284	0.0419385	0.0419176	0.0250785	0.0256699		317.2	0.271978	0.271125	0.225542	0.227229	0.168619	0.168908	0.128562	0.124352
			317.4	0.54246	0.542343	0.501043	0.501818	0.431703	0.432005	0.399712	0.399191		317.4	0.0942715	0.0941882	0.0767007	0.0753442	0.0419788	0.0419266	0.0247746	0.0256752		317.4	0.272327	0.271149	0.225565	0.227248	0.168367	0.168916	0.129167	0.124352
			317.6	0.542285	0.542381	0.500864	0.50185	0.431751	0.432031	0.399731	0.399215		317.6	0.0940858	0.0942046	0.0768398	0.0753599	0.0419704	0.0419356	0.0249488	0.0256804		317.6	0.272709	0.271173	0.22592	0.227267	0.168635	0.168924	0.129199	0.124352
			317.8	0.542352	0.542419	0.500514	0.501881	0.431706	0.432057	0.3996	0.399239		317.8	0.0941283	0.0942211	0.0770891	0.0753757	0.0423954	0.0419446	0.0249485	0.0256857		317.8	0.272691	0.271197	0.226579	0.227286	0.168015	0.168933	0.129065	0.124352
			318	0.542277	0.542458	0.50051	0.501912	0.431904	0.432083	0.399068	0.399262		318	0.0940591	0.0942375	0.0770328	0.0753914	0.0423525	0.0419536	0.0249236	0.025691		318	0.272875	0.271221	0.226826	0.227305	0.167829	0.168941	0.128983	0.124352
			318.2	0.542148	0.542496	0.500661	0.501943	0.432135	0.432109	0.399007	0.399286		318.2	0.0941099	0.094254	0.0765679	0.0754072	0.0420964	0.0419626	0.024788	0.0256962		318.2	0.272942	0.271245	0.226856	0.227324	0.167998	0.168949	0.128493	0.124352
[truncated: 8,408 more rows]

## Sheet: Figure 5
panel b						panel b						panel e												panel f
[truncated: 10,001 more rows]

## Sheet: Supplementary Figure 4
panel a			panel b				panel c
residue no.	R2(R1rho) (s-1)		residue no.	R2b [s-1]	R1*R2b		residue no.	tc [ns]
645	6.5201		645	29.2261	66.768		645	3.56898e-09
[truncated: 75 more rows]

## Sheet: Supplementary Figure 7
panel a			panel b			panel c			panel d				panel e			panel f			panel d
[truncated: 77 more rows]

[truncated: 3 more sheets: Supplementary Figure 8, Supplementary Figure 9, Supplementary Figure 10]
